# Supplementary material for: Transcriptome Analysis and Differential Gene Expression on the Testis of Orange Mud Crab, Scylla olivacea, during Sexual Maturation
Source: PLoS One. 2017 Jan 30;12(1):e0171095. doi: 10.1371/journal.pone.0171095 (PMC5279790; doi:10.1371/journal.pone.0171095)
Supplement: S1 Appendix — (XLSX) [file pone.0171095.s001.xlsx]

## Sheet: SNP_Calling
		UMT_I	UMT_M	UMT_R
	Total Number of Reference Transcripts	160569	160569	160569
	SNPs identified	59224	38851	58106
	Number of Reference Transcripts containing SNPs	19350	12581	19565
	Transition SNPs (A to G) identified	10061	6314	9717
	Transition SNPs (G to A) identified	10453	7243	10228
	Transition SNPs (C to T) identified	10490	7342	10351
	Transition SNPs (T to C) identified	9656	6249	9619
	Transition SNPs (total) identified	40660	27148	39915
	Transversion SNPs (A to C) identified	2243	1414	2190
	Transversion SNPs (C toA) identified	2293	1520	2212
	Transversion SNPs (A to T) identified	2432	1575	2365
	Transversion SNPs (T to A) identified	2614	1469	2399
	Transversion SNPs (C to G) identified	2173	1398	2210
	Transversion SNPs (G to C) identified	2223	1424	2313
	Transversion SNPs (G to T) identified	2298	1499	2254
	Transversion SNPs (T to G) identified	2288	1404	2248
	Transversion SNPs (total) identified	18564	11703	18191
	Table 13: Statistics of SNPs identified in Crab transcriptome data sets.

## Sheet: UMT_I_SNP_Calling
##INFO=<ID=DP,Number=1,Type=Integer,Description="Raw read depth">
##INFO=<ID=VDB,Number=1,Type=Float,Description="Variant Distance Bias for filtering splice-site artefacts in RNA-seq data (bigger is better)",Version="3">
##INFO=<ID=RPB,Number=1,Type=Float,Description="Mann-Whitney U test of Read Position Bias (bigger is better)">
##INFO=<ID=MQB,Number=1,Type=Float,Description="Mann-Whitney U test of Mapping Quality Bias (bigger is better)">
##INFO=<ID=BQB,Number=1,Type=Float,Description="Mann-Whitney U test of Base Quality Bias (bigger is better)">
##INFO=<ID=MQSB,Number=1,Type=Float,Description="Mann-Whitney U test of Mapping Quality vs Strand Bias (bigger is better)">
##INFO=<ID=SGB,Number=1,Type=Float,Description="Segregation based metric.">
##INFO=<ID=MQ0F,Number=1,Type=Float,Description="Fraction of MQ0 reads (smaller is better)">
##FORMAT=<ID=PL,Number=G,Type=Integer,Description="List of Phred-scaled genotype likelihoods">
##FORMAT=<ID=GT,Number=1,Type=String,Description="Genotype">
##INFO=<ID=ICB,Number=1,Type=Float,Description="Inbreeding Coefficient Binomial test (bigger is better)">
##INFO=<ID=HOB,Number=1,Type=Float,Description="Bias in the number of HOMs number (smaller is better)">
##INFO=<ID=AC,Number=A,Type=Integer,Description="Allele count in genotypes for each ALT allele, in the same order as listed">
##INFO=<ID=AN,Number=1,Type=Integer,Description="Total number of alleles in called genotypes">
##INFO=<ID=DP4,Number=4,Type=Integer,Description="Number of high-quality ref-forward , ref-reverse, alt-forward and alt-reverse bases">
##INFO=<ID=MQ,Number=1,Type=Integer,Description="Average mapping quality">
#CHROM	POS	REF	ALT	QUAL	INFO	FORMAT
Ref_Crab_Transcript_48_416	233	A	G	58	DP=12;VDB=0.984372;SGB=-0.651104;RPB=0.878264;MQB=1;MQSB=0.95494;BQB=0.968069;MQ0F=0;ICB=1;HOB=0.5;AC=1;AN=2;DP4=2,2,3,5;MQ=20	GT:PL	0/1:91,0,39
Ref_Crab_Transcript_56_362	250	G	A	31.0957	DP=19;VDB=0.669559;SGB=-0.636426;RPB=1;MQB=1;MQSB=1;BQB=0.294546;MQ0F=0;ICB=1;HOB=0.5;AC=1;AN=2;DP4=3,9,3,4;MQ=20	GT:PL	0/1:64,0,106
Ref_Crab_Transcript_80_343	122	A	G	38.2279	DP=10;VDB=0.000904524;SGB=-0.616816;RPB=0.0559863;MQB=1.00775;MQSB=1.00775;BQB=0.559863;MQ0F=0;ICB=1;HOB=0.5;AC=1;AN=2;DP4=2,2,4,2;MQ=20	GT:PL	0/1:71,0,45
Ref_Crab_Transcript_131_331	149	G	A	52	DP=13;VDB=0.888218;SGB=-0.651104;RPB=0.342519;MQB=1;MQSB=0.961166;BQB=0.547344;MQ0F=0;ICB=1;HOB=0.5;AC=1;AN=2;DP4=3,2,4,4;MQ=20	GT:PL	0/1:85,0,51
Ref_Crab_Transcript_140_1057	967	A	G	57	DP=13;VDB=0.49048;SGB=-0.651104;RPB=0.989343;MQB=1;MQSB=1;BQB=0.50373;MQ0F=0;ICB=1;HOB=0.5;AC=1;AN=2;DP4=1,4,4,4;MQ=20	GT:PL	0/1:90,0,48
Ref_Crab_Transcript_146_648	1	T	G	45.4007	DP=46;VDB=3.02639e-15;SGB=-0.692976;RPB=0.0633913;MQB=1;MQSB=1;BQB=0.0367566;MQ0F=0;ICB=1;HOB=0.5;AC=1;AN=2;DP4=1,19,23,3;MQ=20	GT:PL	0/1:78,0,72
Ref_Crab_Transcript_146_648	3	T	C	43.384	DP=51;VDB=2.92131e-15;SGB=-0.692562;RPB=0.297859;MQB=1;MQSB=1;BQB=0.0312286;MQ0F=0;ICB=1;HOB=0.5;AC=1;AN=2;DP4=5,20,20,2;MQ=20	GT:PL	0/1:76,0,123
Ref_Crab_Transcript_146_648	4	A	T	49.3285	DP=53;VDB=6.67397e-26;SGB=-0.693145;RPB=0.930026;MQB=1;MQSB=1;BQB=0.0210764;MQ0F=0;ICB=1;HOB=0.5;AC=1;AN=2;DP4=4,7,23,18;MQ=20	GT:PL	0/1:84,2,65
Ref_Crab_Transcript_146_648	351	T	A	124	DP=249;VDB=0.541426;SGB=-0.693147;RPB=0.0800398;MQB=1;MQSB=1;BQB=0.393587;MQ0F=0;ICB=1;HOB=0.5;AC=1;AN=2;DP4=53,63,46,77;MQ=20	GT:PL	0/1:157,0,146
Ref_Crab_Transcript_163_795	16	C	A	43.3786	DP=16;VDB=0.00146887;SGB=-0.636426;RPB=0.531709;MQB=0.961166;MQSB=0.961166;BQB=0.0102252;MQ0F=0;ICB=1;HOB=0.5;AC=1;AN=2;DP4=5,1,2,5;MQ=20	GT:PL	0/1:76,0,57
Ref_Crab_Transcript_163_795	17	A	G	46.3404	DP=16;VDB=0.000751702;SGB=-0.651104;RPB=0.399018;MQB=1;MQSB=0.966012;BQB=0.0672055;MQ0F=0;ICB=1;HOB=0.5;AC=1;AN=2;DP4=5,1,2,6;MQ=20	GT:PL	0/1:79,0,55
Ref_Crab_Transcript_163_795	25	G	C	161	DP=23;VDB=1.25075e-07;SGB=-0.692352;RPB=-;MQB=-;MQSB=1;BQB=-;MQ0F=0;ICB=-;HOB=-;AC=2;AN=2;DP4=0,0,11,10;MQ=20	GT:PL	1/1:188,63,0
Ref_Crab_Transcript_165_615	1	A	C	43.9644	DP=27;VDB=3.00802e-15;SGB=-0.692352;RPB=0.782784;MQB=1;MQSB=1;BQB=0.973156;MQ0F=0;ICB=1;HOB=0.5;AC=1;AN=2;DP4=2,4,15,6;MQ=20	GT:PL	0/1:89,12,53
Ref_Crab_Transcript_165_615	2	A	G	52	DP=59;VDB=2.96039e-15;SGB=-0.692717;RPB=0.375581;MQB=1;MQSB=1;BQB=0.969645;MQ0F=0;ICB=1;HOB=0.5;AC=1;AN=2;DP4=5,3,16,7;MQ=20	GT:PL	0/1:104,22,81
Ref_Crab_Transcript_165_615	121	T	G	117	DP=197;VDB=0.000415298;SGB=-0.693147;RPB=0.857696;MQB=1;MQSB=1;BQB=0.251728;MQ0F=0;ICB=1;HOB=0.5;AC=1;AN=2;DP4=27,63,43,60;MQ=20	GT:PL	0/1:150,0,144
Ref_Crab_Transcript_165_615	241	G	A	75	DP=62;VDB=0.163008;SGB=-0.692831;RPB=0.484871;MQB=1;MQSB=1;BQB=0.00696017;MQ0F=0;ICB=1;HOB=0.5;AC=1;AN=2;DP4=25,12,14,10;MQ=20	GT:PL	0/1:108,0,132
Ref_Crab_Transcript_208_832	299	C	T	62	DP=41;VDB=0.0830043;SGB=-0.691153;RPB=0.682939;MQB=1;MQSB=1;BQB=0.873005;MQ0F=0;ICB=1;HOB=0.5;AC=1;AN=2;DP4=14,7,14,4;MQ=20	GT:PL	0/1:95,0,122
Ref_Crab_Transcript_219_384	120	C	T	52	DP=83;VDB=0.0212779;SGB=-0.693132;RPB=0.223293;MQB=1;MQSB=1;BQB=0.495369;MQ0F=0;ICB=1;HOB=0.5;AC=1;AN=2;DP4=39,10,28,6;MQ=20	GT:PL	0/1:85,0,113
Ref_Crab_Transcript_221_395	211	G	A	117	DP=92;VDB=0.977183;SGB=-0.693147;RPB=0.805987;MQB=1;MQSB=1;BQB=0.87288;MQ0F=0;ICB=1;HOB=0.5;AC=1;AN=2;DP4=15,27,18,31;MQ=20	GT:PL	0/1:150,0,138
Ref_Crab_Transcript_228_739	586	G	C	31.3177	DP=16;VDB=0.320361;SGB=-0.616816;RPB=0.625784;MQB=1;MQSB=1;BQB=0.991701;MQ0F=0;ICB=1;HOB=0.5;AC=1;AN=2;DP4=5,3,3,3;MQ=20	GT:PL	0/1:64,0,85
Ref_Crab_Transcript_277_995	935	A	G	48.2827	DP=12;VDB=0.0992599;SGB=-0.636426;RPB=0.760054;MQB=0.95494;MQSB=1;BQB=0.13642;MQ0F=0;ICB=1;HOB=0.5;AC=1;AN=2;DP4=0,5,3,4;MQ=20	GT:PL	0/1:81,0,42
Ref_Crab_Transcript_291_441	414	C	T	44.4518	DP=11;VDB=0.000736396;SGB=-0.651104;RPB=0.920044;MQB=1;MQSB=1;BQB=0.360295;MQ0F=0;ICB=1;HOB=0.5;AC=1;AN=2;DP4=1,2,1,7;MQ=20	GT:PL	0/1:78,0,25
Ref_Crab_Transcript_297_938	360	A	G	90	DP=155;VDB=0.075843;SGB=-0.693147;RPB=0.784767;MQB=1;MQSB=1;BQB=0.968503;MQ0F=0;ICB=1;HOB=0.5;AC=1;AN=2;DP4=32,53,29,33;MQ=20	GT:PL	0/1:123,0,151
Ref_Crab_Transcript_297_938	773	T	C	44.1941	DP=26;VDB=0.2421;SGB=-0.662043;RPB=0.00307112;MQB=1;MQSB=1;BQB=0.399651;MQ0F=0;ICB=1;HOB=0.5;AC=1;AN=2;DP4=4,10,5,4;MQ=20	GT:PL	0/1:77,0,116
Ref_Crab_Transcript_316_715	109	T	C	42.2821	DP=12;VDB=0.996188;SGB=-0.636426;RPB=0.40926;MQB=0.95494;MQSB=0.95494;BQB=0.838008;MQ0F=0;ICB=1;HOB=0.5;AC=1;AN=2;DP4=2,3,5,2;MQ=20	GT:PL	0/1:75,0,55
Ref_Crab_Transcript_316_715	182	C	A	69	DP=21;VDB=0.024461;SGB=-0.680642;RPB=0.0235003;MQB=1;MQSB=1;BQB=0.207131;MQ0F=0;ICB=1;HOB=0.5;AC=1;AN=2;DP4=5,3,5,7;MQ=20	GT:PL	0/1:102,0,71
Ref_Crab_Transcript_317_903	749	C	T	36.355	DP=12;VDB=0.827357;SGB=-0.636426;RPB=0.838008;MQB=0.95494;MQSB=0.982603;BQB=0.13642;MQ0F=0;ICB=1;HOB=0.5;AC=1;AN=2;DP4=2,3,4,3;MQ=20	GT:PL	0/1:69,0,55
Ref_Crab_Transcript_345_575	198	T	C	63	DP=11;VDB=0.0760875;SGB=-0.651104;RPB=0.5625;MQB=1;MQSB=0.916482;BQB=0.875;MQ0F=0;ICB=1;HOB=0.5;AC=1;AN=2;DP4=0,2,3,5;MQ=20	GT:PL	0/1:95,0,8
Ref_Crab_Transcript_349_873	112	T	C	85	DP=10;VDB=0.358583;SGB=-0.662043;RPB=1;MQB=1;MQSB=1.00775;BQB=1;MQ0F=0;ICB=-;HOB=-;AC=2;AN=2;DP4=1,0,5,4;MQ=20	GT:PL	1/1:112,10,0
Ref_Crab_Transcript_401_1434	1401	C	T	33.8058	DP=53;VDB=2.42228e-06;SGB=-0.690438;RPB=0.425667;MQB=1;MQSB=1;BQB=0.887883;MQ0F=0;ICB=1;HOB=0.5;AC=1;AN=2;DP4=8,27,3,14;MQ=20	GT:PL	0/1:67,0,142
Ref_Crab_Transcript_462_464	101	G	A	30.3544	DP=10;VDB=0.181959;SGB=-0.590765;RPB=0.162433;MQB=0.974597;MQSB=0.924584;BQB=0.649731;MQ0F=0;ICB=1;HOB=0.5;AC=1;AN=2;DP4=1,3,2,3;MQ=20	GT:PL	0/1:63,0,46
Ref_Crab_Transcript_575_373	36	T	A	58	DP=11;VDB=0.00513213;SGB=-0.616816;RPB=-;MQB=-;MQSB=1;BQB=-;MQ0F=0;ICB=-;HOB=-;AC=2;AN=2;DP4=0,0,5,1;MQ=20	GT:PL	1/1:85,18,0
Ref_Crab_Transcript_581_344	119	C	T	76	DP=11;VDB=0.193383;SGB=-0.670168;RPB=1;MQB=1;MQSB=1;BQB=1;MQ0F=0;ICB=-;HOB=-;AC=2;AN=2;DP4=1,0,7,3;MQ=20	GT:PL	1/1:103,13,0
Ref_Crab_Transcript_672_370	113	T	C	59	DP=34;VDB=0.754011;SGB=-0.690438;RPB=0.999852;MQB=1;MQSB=1;BQB=0.555114;MQ0F=0;ICB=1;HOB=0.5;AC=1;AN=2;DP4=12,5,14,3;MQ=20	GT:PL	0/1:92,0,108
Ref_Crab_Transcript_725_373	249	T	C	109	DP=37;VDB=0.0136664;SGB=-0.693021;RPB=0.00216277;MQB=1;MQSB=1;BQB=0.973096;MQ0F=0;ICB=-;HOB=-;AC=2;AN=2;DP4=0,5,17,10;MQ=20	GT:PL	1/1:136,11,0
Ref_Crab_Transcript_725_373	253	A	G	109	DP=31;VDB=0.00085135;SGB=-0.692067;RPB=0.00312216;MQB=1;MQSB=1;BQB=0.846427;MQ0F=0;ICB=1;HOB=0.5;AC=1;AN=2;DP4=0,5,10,10;MQ=20	GT:PL	0/1:139,0,5
Ref_Crab_Transcript_725_373	254	G	T	107	DP=29;VDB=0.000936341;SGB=-0.692067;RPB=0.00312216;MQB=1;MQSB=1;BQB=0.736982;MQ0F=0;ICB=1;HOB=0.5;AC=1;AN=2;DP4=0,5,10,10;MQ=20	GT:PL	0/1:139,0,8
Ref_Crab_Transcript_725_373	259	T	A	106	DP=29;VDB=0.000936341;SGB=-0.692067;RPB=0.00127263;MQB=1;MQSB=1;BQB=0.83095;MQ0F=0;ICB=1;HOB=0.5;AC=1;AN=2;DP4=1,5,10,10;MQ=20	GT:PL	0/1:140,0,26
Ref_Crab_Transcript_725_373	270	T	A	104	DP=24;VDB=0.0427703;SGB=-0.69168;RPB=0.0286491;MQB=1;MQSB=1;BQB=0.926426;MQ0F=0;ICB=1;HOB=0.5;AC=1;AN=2;DP4=0,5,9,10;MQ=20	GT:PL	0/1:136,0,9
Ref_Crab_Transcript_725_373	275	A	G	86	DP=20;VDB=0.0467126;SGB=-0.683931;RPB=0.0854765;MQB=1;MQSB=1;BQB=0.957217;MQ0F=0;ICB=1;HOB=0.5;AC=1;AN=2;DP4=0,5,7,6;MQ=20	GT:PL	0/1:120,0,27
Ref_Crab_Transcript_725_373	276	G	C	74	DP=20;VDB=2.60425e-05;SGB=-0.676189;RPB=0.00229059;MQB=1;MQSB=1;BQB=0.32741;MQ0F=0;ICB=1;HOB=0.5;AC=1;AN=2;DP4=1,6,6,5;MQ=20	GT:PL	0/1:107,0,57
Ref_Crab_Transcript_725_373	280	A	G	74	DP=18;VDB=2.39019e-05;SGB=-0.676189;RPB=0.00229059;MQB=1;MQSB=1;BQB=0.743558;MQ0F=0;ICB=1;HOB=0.5;AC=1;AN=2;DP4=1,6,6,5;MQ=20	GT:PL	0/1:107,0,57
Ref_Crab_Transcript_725_373	286	C	T	69	DP=18;VDB=9.08162e-05;SGB=-0.670168;RPB=0.0029283;MQB=1;MQSB=1;BQB=0.0997826;MQ0F=0;ICB=1;HOB=0.5;AC=1;AN=2;DP4=1,6,5,5;MQ=20	GT:PL	0/1:102,0,59
Ref_Crab_Transcript_725_373	298	T	A	49.0752	DP=13;VDB=0.539658;SGB=-0.636426;RPB=0.562708;MQB=0.964642;MQSB=0.964642;BQB=0.241161;MQ0F=0;ICB=1;HOB=0.5;AC=1;AN=2;DP4=0,4,4,3;MQ=20	GT:PL	0/1:82,0,33
Ref_Crab_Transcript_813_1287	688	C	T	90	DP=17;VDB=0.443537;SGB=-0.683931;RPB=0.30215;MQB=1;MQSB=1;BQB=0.945009;MQ0F=0;ICB=1;HOB=0.5;AC=1;AN=2;DP4=1,2,5,8;MQ=20	GT:PL	0/1:123,0,10
Ref_Crab_Transcript_815_672	344	A	G	119	DP=33;VDB=0.378423;SGB=-0.693054;RPB=0.98872;MQB=1;MQSB=1;BQB=0.694693;MQ0F=0;ICB=-;HOB=-;AC=2;AN=2;DP4=3,2,13,15;MQ=20	GT:PL	1/1:146,5,0
Ref_Crab_Transcript_890_360	90	T	A	97	DP=30;VDB=0.110461;SGB=-0.691153;RPB=0.686212;MQB=1;MQSB=1;BQB=0.957043;MQ0F=0;ICB=1;HOB=0.5;AC=1;AN=2;DP4=4,8,10,8;MQ=20	GT:PL	0/1:130,0,90
Ref_Crab_Transcript_935_595	307	T	C	77	DP=15;VDB=0.28694;SGB=-0.676189;RPB=0.981007;MQB=1;MQSB=1;BQB=0.900862;MQ0F=0;ICB=1;HOB=0.5;AC=1;AN=2;DP4=3,1,6,5;MQ=20	GT:PL	0/1:111,0,28
Ref_Crab_Transcript_940_442	200	C	T	48.3893	DP=17;VDB=0.00864413;SGB=-0.651104;RPB=0.377804;MQB=1;MQSB=1;BQB=0.743567;MQ0F=0;ICB=1;HOB=0.5;AC=1;AN=2;DP4=6,3,3,5;MQ=20	GT:PL	0/1:81,0,87
Ref_Crab_Transcript_984_762	536	C	T	109	DP=82;VDB=0.166393;SGB=-0.693145;RPB=0.0672055;MQB=1;MQSB=1;BQB=0.999955;MQ0F=0;ICB=1;HOB=0.5;AC=1;AN=2;DP4=21,19,18,23;MQ=20	GT:PL	0/1:142,0,137
Ref_Crab_Transcript_994_686	320	C	T	44.1276	DP=11;VDB=0.385886;SGB=-0.636426;RPB=0.964642;MQB=0.964642;MQSB=0.950952;BQB=0.562708;MQ0F=0;ICB=1;HOB=0.5;AC=1;AN=2;DP4=2,2,4,3;MQ=20	GT:PL	0/1:77,0,42
Ref_Crab_Transcript_994_686	328	C	T	35.3609	DP=11;VDB=0.19611;SGB=-0.616816;RPB=0.950952;MQB=0.950952;MQSB=0.950952;BQB=0.8618;MQ0F=0;ICB=1;HOB=0.5;AC=1;AN=2;DP4=2,3,4,2;MQ=20	GT:PL	0/1:68,0,55
Ref_Crab_Transcript_1022_570	464	T	C	36.2704	DP=10;VDB=0.904054;SGB=-0.616816;RPB=0.895781;MQB=1.00775;MQSB=1.00775;BQB=0.727822;MQ0F=0;ICB=1;HOB=0.5;AC=1;AN=2;DP4=3,1,3,3;MQ=20	GT:PL	0/1:69,0,42
Ref_Crab_Transcript_1030_400	265	G	A	37.2356	DP=10;VDB=0.0321945;SGB=-0.616816;RPB=0.727822;MQB=1.00775;MQSB=0.916482;BQB=1.00775;MQ0F=0;ICB=1;HOB=0.5;AC=1;AN=2;DP4=3,1,4,2;MQ=20	GT:PL	0/1:70,0,42
Ref_Crab_Transcript_1084_725	523	T	A	92	DP=88;VDB=0.546468;SGB=-0.693141;RPB=0.997644;MQB=1;MQSB=1;BQB=0.46076;MQ0F=0;ICB=1;HOB=0.5;AC=1;AN=2;DP4=29,21,19,18;MQ=20	GT:PL	0/1:125,0,141
Ref_Crab_Transcript_1218_359	96	T	G	44.2108	DP=23;VDB=0.626335;SGB=-0.662043;RPB=0.941746;MQB=1;MQSB=1;BQB=0.987676;MQ0F=0;ICB=1;HOB=0.5;AC=1;AN=2;DP4=11,3,5,4;MQ=20	GT:PL	0/1:77,0,98
Ref_Crab_Transcript_1315_655	171	G	T	31.4065	DP=12;VDB=0.625428;SGB=-0.616816;RPB=0.304946;MQB=0.982603;MQSB=1;BQB=0.304946;MQ0F=0;ICB=1;HOB=0.5;AC=1;AN=2;DP4=4,2,4,2;MQ=20	GT:PL	0/1:64,0,66
Ref_Crab_Transcript_1456_398	207	T	C	89	DP=62;VDB=0.459449;SGB=-0.693054;RPB=0.0624534;MQB=1;MQSB=1;BQB=0.321525;MQ0F=0;ICB=1;HOB=0.5;AC=1;AN=2;DP4=16,18,7,21;MQ=20	GT:PL	0/1:122,0,146
Ref_Crab_Transcript_1474_322	129	T	C	88	DP=12;VDB=0.0862644;SGB=-0.676189;RPB=1;MQB=1;MQSB=1;BQB=1;MQ0F=0;ICB=-;HOB=-;AC=2;AN=2;DP4=1,0,8,3;MQ=20	GT:PL	1/1:115,16,0
Ref_Crab_Transcript_1474_322	137	G	C	80	DP=14;VDB=0.0934132;SGB=-0.676189;RPB=1;MQB=1;MQSB=1;BQB=1;MQ0F=0;ICB=-;HOB=-;AC=2;AN=2;DP4=1,0,8,3;MQ=20	GT:PL	1/1:107,13,0
Ref_Crab_Transcript_1474_322	151	G	A	65	DP=15;VDB=0.251242;SGB=-0.676189;RPB=0.0632055;MQB=1;MQSB=1;BQB=0.966484;MQ0F=0;ICB=1;HOB=0.5;AC=1;AN=2;DP4=2,2,8,3;MQ=20	GT:PL	0/1:99,0,31
Ref_Crab_Transcript_1474_322	161	C	T	48.8946	DP=12;VDB=0.49286;SGB=-0.651104;RPB=0.397295;MQB=1;MQSB=1;BQB=0.968069;MQ0F=0;ICB=1;HOB=0.5;AC=1;AN=2;DP4=2,2,6,2;MQ=20	GT:PL	0/1:82,0,39
Ref_Crab_Transcript_1474_322	165	T	G	50	DP=12;VDB=0.552214;SGB=-0.651104;RPB=0.716531;MQB=1;MQSB=0.964642;BQB=0.655816;MQ0F=0;ICB=1;HOB=0.5;AC=1;AN=2;DP4=1,2,6,2;MQ=20	GT:PL	0/1:84,0,25
Ref_Crab_Transcript_1474_322	170	C	A	44.0695	DP=11;VDB=0.442059;SGB=-0.636426;RPB=0.562708;MQB=0.964642;MQSB=0.964642;BQB=0.924449;MQ0F=0;ICB=1;HOB=0.5;AC=1;AN=2;DP4=2,2,5,2;MQ=20	GT:PL	0/1:77,0,42
Ref_Crab_Transcript_1474_322	181	G	C	36.0402	DP=11;VDB=0.539658;SGB=-0.636426;RPB=0.562708;MQB=0.964642;MQSB=1;BQB=0.803868;MQ0F=0;ICB=1;HOB=0.5;AC=1;AN=2;DP4=2,2,6,1;MQ=20	GT:PL	0/1:69,0,40
Ref_Crab_Transcript_1583_439	160	G	A	93	DP=135;VDB=0.162152;SGB=-0.693147;RPB=0.942368;MQB=1;MQSB=1;BQB=0.643189;MQ0F=0;ICB=1;HOB=0.5;AC=1;AN=2;DP4=34,41,28,29;MQ=20	GT:PL	0/1:126,0,148
Ref_Crab_Transcript_1595_675	116	T	C	44.458	DP=48;VDB=0.117524;SGB=-0.693127;RPB=0.468186;MQB=1;MQSB=1;BQB=0.348719;MQ0F=0;ICB=1;HOB=0.5;AC=1;AN=2;DP4=12,1,30,3;MQ=20	GT:PL	0/1:78,0,33
Ref_Crab_Transcript_1608_395	242	T	C	34.1858	DP=22;VDB=0.145738;SGB=-0.636426;RPB=0.663573;MQB=1;MQSB=1;BQB=0.995907;MQ0F=0;ICB=1;HOB=0.5;AC=1;AN=2;DP4=8,3,3,4;MQ=20	GT:PL	0/1:67,0,96
Ref_Crab_Transcript_1608_395	252	A	G	83	DP=24;VDB=0.650735;SGB=-0.689466;RPB=0.912219;MQB=1;MQSB=1;BQB=0.992528;MQ0F=0;ICB=1;HOB=0.5;AC=1;AN=2;DP4=5,3,11,5;MQ=20	GT:PL	0/1:116,0,61
Ref_Crab_Transcript_1637_307	158	G	A	90	DP=49;VDB=0.0516043;SGB=-0.692717;RPB=0.851252;MQB=1;MQSB=1;BQB=0.9698;MQ0F=0;ICB=1;HOB=0.5;AC=1;AN=2;DP4=12,13,14,9;MQ=20	GT:PL	0/1:123,0,137
Ref_Crab_Transcript_1792_370	253	T	C	44.1121	DP=11;VDB=0.618522;SGB=-0.636426;RPB=0.924449;MQB=0.964642;MQSB=0.950952;BQB=0.803868;MQ0F=0;ICB=1;HOB=0.5;AC=1;AN=2;DP4=3,1,2,5;MQ=20	GT:PL	0/1:77,0,39
Ref_Crab_Transcript_1795_425	401	T	A	81	DP=58;VDB=1.14323e-06;SGB=-0.692831;RPB=0.0196073;MQB=1;MQSB=1;BQB=0.0103836;MQ0F=0;ICB=1;HOB=0.5;AC=1;AN=2;DP4=17,16,10,14;MQ=20	GT:PL	0/1:114,0,145
Ref_Crab_Transcript_1795_425	407	C	A	35.6099	DP=52;VDB=1.33125e-05;SGB=-0.683931;RPB=0.89835;MQB=1;MQSB=1;BQB=0.175689;MQ0F=0;ICB=1;HOB=0.5;AC=1;AN=2;DP4=15,16,7,6;MQ=20	GT:PL	0/1:69,0,147
Ref_Crab_Transcript_1904_970	126	A	G	44.0695	DP=11;VDB=0.159342;SGB=-0.636426;RPB=0.361741;MQB=0.964642;MQSB=0.964642;BQB=0.200967;MQ0F=0;ICB=1;HOB=0.5;AC=1;AN=2;DP4=2,2,5,2;MQ=20	GT:PL	0/1:77,0,42
Ref_Crab_Transcript_1924_638	187	C	G	40.3852	DP=15;VDB=0.168254;SGB=-0.636426;RPB=0.651439;MQB=1;MQSB=1;BQB=0.720273;MQ0F=0;ICB=1;HOB=0.5;AC=1;AN=2;DP4=5,3,4,3;MQ=20	GT:PL	0/1:73,0,83
Ref_Crab_Transcript_1954_561	169	T	C	61	DP=11;VDB=0.529033;SGB=-0.662043;RPB=0.333333;MQB=1;MQSB=0.950952;BQB=0.666667;MQ0F=0;ICB=1;HOB=0.5;AC=1;AN=2;DP4=1,1,4,5;MQ=20	GT:PL	0/1:93,0,7
Ref_Crab_Transcript_2002_558	457	A	G	49.0695	DP=11;VDB=0.0307263;SGB=-0.636426;RPB=0.0803868;MQB=0.964642;MQSB=0.950952;BQB=0.964642;MQ0F=0;ICB=1;HOB=0.5;AC=1;AN=2;DP4=2,2,4,3;MQ=20	GT:PL	0/1:82,0,42
Ref_Crab_Transcript_2161_594	327	G	A	66	DP=21;VDB=0.260266;SGB=-0.676189;RPB=0.939898;MQB=1;MQSB=1;BQB=0.869825;MQ0F=0;ICB=1;HOB=0.5;AC=1;AN=2;DP4=5,5,4,7;MQ=20	GT:PL	0/1:99,0,93
Ref_Crab_Transcript_2204_385	106	T	C	31.2308	DP=10;VDB=0.479322;SGB=-0.616816;RPB=0.895781;MQB=1.00775;MQSB=1;BQB=0.279932;MQ0F=0;ICB=1;HOB=0.5;AC=1;AN=2;DP4=3,1,5,1;MQ=20	GT:PL	0/1:64,0,42
Ref_Crab_Transcript_2268_506	139	G	C	38.4047	DP=15;VDB=0.281405;SGB=-0.636426;RPB=0.966012;MQB=0.966012;MQSB=1;BQB=0.30295;MQ0F=0;ICB=1;HOB=0.5;AC=1;AN=2;DP4=3,4,5,2;MQ=20	GT:PL	0/1:71,0,77
Ref_Crab_Transcript_2288_956	429	A	T	106	DP=30;VDB=0.898955;SGB=-0.692067;RPB=0.904586;MQB=1;MQSB=1;BQB=0.977751;MQ0F=0;ICB=1;HOB=0.5;AC=1;AN=2;DP4=3,6,10,10;MQ=20	GT:PL	0/1:139,0,62
Ref_Crab_Transcript_2288_956	832	G	C	52	DP=12;VDB=0.809098;SGB=-0.662043;RPB=0.444444;MQB=1;MQSB=1;BQB=0.5;MQ0F=0;ICB=1;HOB=0.5;AC=1;AN=2;DP4=0,2,1,8;MQ=20	GT:PL	0/1:82,0,5
Ref_Crab_Transcript_2308_475	197	C	T	53	DP=10;VDB=0.85525;SGB=-0.636426;RPB=0.571429;MQB=1;MQSB=0.974597;BQB=0.285714;MQ0F=0;ICB=1;HOB=0.5;AC=1;AN=2;DP4=0,2,4,3;MQ=20	GT:PL	0/1:84,0,7
Ref_Crab_Transcript_2363_623	523	T	G	59	DP=12;VDB=0.195999;SGB=-0.662043;RPB=0.962269;MQB=1;MQSB=1;BQB=0.811069;MQ0F=0;ICB=1;HOB=0.5;AC=1;AN=2;DP4=0,3,2,7;MQ=20	GT:PL	0/1:93,0,18
Ref_Crab_Transcript_2436_928	320	T	C	70	DP=16;VDB=0.00341848;SGB=-0.670168;RPB=0.948436;MQB=1;MQSB=1;BQB=0.522814;MQ0F=0;ICB=1;HOB=0.5;AC=1;AN=2;DP4=5,1,5,5;MQ=20	GT:PL	0/1:103,0,49
Ref_Crab_Transcript_2472_898	210	G	C	117	DP=55;VDB=1.93997e-15;SGB=-0.693147;RPB=0.68579;MQB=1;MQSB=1;BQB=0.813784;MQ0F=0;ICB=-;HOB=-;AC=2;AN=2;DP4=2,1,41,10;MQ=20	GT:PL	1/1:144,102,0
Ref_Crab_Transcript_2473_715	519	T	C	49.3047	DP=28;VDB=0.29105;SGB=-0.676189;RPB=0.599223;MQB=1;MQSB=1;BQB=0.999663;MQ0F=0;ICB=1;HOB=0.5;AC=1;AN=2;DP4=8,7,8,3;MQ=20	GT:PL	0/1:82,0,121
Ref_Crab_Transcript_2477_943	450	A	G	107	DP=57;VDB=0.00162722;SGB=-0.693145;RPB=0.651323;MQB=1;MQSB=1;BQB=0.081468;MQ0F=0;ICB=1;HOB=0.5;AC=1;AN=2;DP4=4,11,21,19;MQ=20	GT:PL	0/1:141,0,56
Ref_Crab_Transcript_2493_613	354	G	A	30.3052	DP=10;VDB=0.974085;SGB=-0.616816;RPB=0.783809;MQB=1.00775;MQSB=0.952347;BQB=0.167959;MQ0F=0;ICB=1;HOB=0.5;AC=1;AN=2;DP4=1,3,4,2;MQ=20	GT:PL	0/1:63,0,43
Ref_Crab_Transcript_2510_1916	1328	C	T	40.3852	DP=15;VDB=0.768686;SGB=-0.636426;RPB=0.993326;MQB=1;MQSB=1;BQB=0.351229;MQ0F=0;ICB=1;HOB=0.5;AC=1;AN=2;DP4=5,3,4,3;MQ=20	GT:PL	0/1:73,0,83
Ref_Crab_Transcript_2588_648	247	T	A	38.3663	DP=16;VDB=0.0114744;SGB=-0.636426;RPB=0.965592;MQB=1;MQSB=1;BQB=0.892753;MQ0F=0;ICB=1;HOB=0.5;AC=1;AN=2;DP4=4,5,4,3;MQ=20	GT:PL	0/1:71,0,86
Ref_Crab_Transcript_2626_535	165	C	T	37.6667	DP=43;VDB=0.592507;SGB=-0.683931;RPB=0.208132;MQB=1;MQSB=1;BQB=0.938264;MQ0F=0;ICB=1;HOB=0.5;AC=1;AN=2;DP4=23,7,7,6;MQ=20	GT:PL	0/1:71,0,115
Ref_Crab_Transcript_2652_362	288	G	A	40.9491	DP=12;VDB=0.000815903;SGB=-0.651104;RPB=0.0249144;MQB=1;MQSB=1;BQB=0.838046;MQ0F=0;ICB=1;HOB=0.5;AC=1;AN=2;DP4=1,3,1,7;MQ=20	GT:PL	0/1:74,0,38
Ref_Crab_Transcript_2652_362	291	T	C	39.0703	DP=12;VDB=0.00212669;SGB=-0.636426;RPB=0.0401934;MQB=0.964642;MQSB=1;BQB=0.924449;MQ0F=0;ICB=1;HOB=0.5;AC=1;AN=2;DP4=1,3,1,6;MQ=20	GT:PL	0/1:72,0,40
Ref_Crab_Transcript_2652_362	292	G	A	39.0703	DP=12;VDB=0.00212669;SGB=-0.636426;RPB=0.0401934;MQB=0.964642;MQSB=1;BQB=0.763675;MQ0F=0;ICB=1;HOB=0.5;AC=1;AN=2;DP4=1,3,1,6;MQ=20	GT:PL	0/1:72,0,40
Ref_Crab_Transcript_2652_362	298	T	C	33.2294	DP=11;VDB=0.00794932;SGB=-0.616816;RPB=0.0559863;MQB=1.00775;MQSB=1;BQB=0.111973;MQ0F=0;ICB=1;HOB=0.5;AC=1;AN=2;DP4=1,3,1,5;MQ=20	GT:PL	0/1:66,0,43
Ref_Crab_Transcript_2824_784	229	T	C	41.2276	DP=10;VDB=0.177551;SGB=-0.616816;RPB=0.895781;MQB=1.00775;MQSB=0.952347;BQB=0.895781;MQ0F=0;ICB=1;HOB=0.5;AC=1;AN=2;DP4=2,2,3,3;MQ=20	GT:PL	0/1:74,0,45
Ref_Crab_Transcript_2831_375	291	A	G	30.3868	DP=13;VDB=0.0389458;SGB=-0.616816;RPB=0.470358;MQB=0.961166;MQSB=0.961166;BQB=0.531709;MQ0F=0;ICB=1;HOB=0.5;AC=1;AN=2;DP4=2,5,4,2;MQ=20	GT:PL	0/1:63,0,74
Ref_Crab_Transcript_2897_416	93	C	T	62	DP=37;VDB=0.756117;SGB=-0.69311;RPB=0.974648;MQB=1;MQSB=1;BQB=0.01471;MQ0F=0;ICB=-;HOB=-;AC=2;AN=2;DP4=6,0,27,4;MQ=20	GT:PL	1/1:89,10,0
Ref_Crab_Transcript_2897_416	117	C	A	49.3965	DP=39;VDB=0.389632;SGB=-0.69168;RPB=0.899824;MQB=1;MQSB=1;BQB=0.588434;MQ0F=0;ICB=1;HOB=0.5;AC=1;AN=2;DP4=14,3,17,2;MQ=20	GT:PL	0/1:82,0,89
Ref_Crab_Transcript_3129_440	272	C	G	62	DP=26;VDB=0.453287;SGB=-0.676189;RPB=0.598107;MQB=1;MQSB=1;BQB=0.615676;MQ0F=0;ICB=1;HOB=0.5;AC=1;AN=2;DP4=5,8,4,7;MQ=20	GT:PL	0/1:95,0,113
Ref_Crab_Transcript_3168_484	292	T	C	46.3785	DP=13;VDB=0.250641;SGB=-0.636426;RPB=0.961166;MQB=0.961166;MQSB=0.961166;BQB=0.828239;MQ0F=0;ICB=1;HOB=0.5;AC=1;AN=2;DP4=3,3,3,4;MQ=20	GT:PL	0/1:79,0,66
Ref_Crab_Transcript_3205_328	184	G	T	31.3716	DP=11;VDB=0.311141;SGB=-0.616816;RPB=0.683497;MQB=0.950952;MQSB=1;BQB=0.683497;MQ0F=0;ICB=1;HOB=0.5;AC=1;AN=2;DP4=0,5,1,5;MQ=20	GT:PL	0/1:64,0,44
Ref_Crab_Transcript_3205_328	196	A	C	31.3716	DP=11;VDB=0.311141;SGB=-0.616816;RPB=0.683497;MQB=0.950952;MQSB=1;BQB=0.475476;MQ0F=0;ICB=1;HOB=0.5;AC=1;AN=2;DP4=0,5,1,5;MQ=20	GT:PL	0/1:64,0,44
Ref_Crab_Transcript_3205_328	212	G	A	31.3716	DP=11;VDB=0.323459;SGB=-0.616816;RPB=0.683497;MQB=0.950952;MQSB=1;BQB=0.148586;MQ0F=0;ICB=1;HOB=0.5;AC=1;AN=2;DP4=0,5,1,5;MQ=20	GT:PL	0/1:64,0,44
Ref_Crab_Transcript_3205_328	213	A	G	31.3716	DP=11;VDB=0.323459;SGB=-0.616816;RPB=0.683497;MQB=0.950952;MQSB=1;BQB=0.148586;MQ0F=0;ICB=1;HOB=0.5;AC=1;AN=2;DP4=0,5,1,5;MQ=20	GT:PL	0/1:64,0,44
Ref_Crab_Transcript_3258_760	103	T	C	74	DP=30;VDB=0.417754;SGB=-0.686358;RPB=0.932405;MQB=1;MQSB=1;BQB=0.70778;MQ0F=0;ICB=1;HOB=0.5;AC=1;AN=2;DP4=9,7,8,6;MQ=20	GT:PL	0/1:107,0,120
Ref_Crab_Transcript_3309_774	323	C	T	30.4041	DP=12;VDB=0.706942;SGB=-0.616816;RPB=0.931779;MQB=0.982603;MQSB=1;BQB=0.660716;MQ0F=0;ICB=1;HOB=0.5;AC=1;AN=2;DP4=5,1,3,3;MQ=20	GT:PL	0/1:63,0,59
Ref_Crab_Transcript_3474_448	1	T	C	69	DP=12;VDB=2.26006e-08;SGB=-0.676189;RPB=1;MQB=1;MQSB=1;BQB=1;MQ0F=0;ICB=-;HOB=-;AC=2;AN=2;DP4=0,1,2,9;MQ=20	GT:PL	1/1:100,15,4
Ref_Crab_Transcript_3474_448	2	G	C	38.6443	DP=17;VDB=2.8314e-08;SGB=-0.676189;RPB=0.823708;MQB=1;MQSB=1;BQB=0.599223;MQ0F=0;ICB=1;HOB=0.5;AC=1;AN=2;DP4=0,3,2,9;MQ=20	GT:PL	0/1:72,0,16
Ref_Crab_Transcript_3485_487	86	C	T	138	DP=34;VDB=0.265275;SGB=-0.693132;RPB=-;MQB=-;MQSB=1;BQB=-;MQ0F=0;ICB=-;HOB=-;AC=2;AN=2;DP4=0,0,26,8;MQ=20	GT:PL	1/1:165,102,0
Ref_Crab_Transcript_3485_487	96	G	A	139	DP=40;VDB=0.705884;SGB=-0.693143;RPB=0.368421;MQB=1;MQSB=1;BQB=0.842105;MQ0F=0;ICB=-;HOB=-;AC=2;AN=2;DP4=1,1,26,12;MQ=20	GT:PL	1/1:166,79,0
Ref_Crab_Transcript_3485_487	112	C	T	99	DP=40;VDB=0.609423;SGB=-0.693097;RPB=0.979601;MQB=1;MQSB=1;BQB=0.830699;MQ0F=0;ICB=1;HOB=0.5;AC=1;AN=2;DP4=6,4,19,11;MQ=20	GT:PL	0/1:133,0,45
Ref_Crab_Transcript_3485_487	128	T	A	64	DP=33;VDB=0.106561;SGB=-0.680642;RPB=0.204741;MQB=1;MQSB=1;BQB=0.242449;MQ0F=0;ICB=1;HOB=0.5;AC=1;AN=2;DP4=8,7,7,5;MQ=20	GT:PL	0/1:97,0,118
Ref_Crab_Transcript_3485_487	130	A	G	64	DP=35;VDB=0.106561;SGB=-0.680642;RPB=0.979058;MQB=1;MQSB=1;BQB=0.799679;MQ0F=0;ICB=1;HOB=0.5;AC=1;AN=2;DP4=8,6,7,5;MQ=20	GT:PL	0/1:97,0,114
Ref_Crab_Transcript_3485_487	275	T	G	35.5498	DP=81;VDB=0.0417375;SGB=-0.692717;RPB=0.705972;MQB=1;MQSB=1;BQB=0.999308;MQ0F=0;ICB=1;HOB=0.5;AC=1;AN=2;DP4=26,31,12,11;MQ=20	GT:PL	0/1:69,0,136
Ref_Crab_Transcript_3485_487	336	C	T	105	DP=74;VDB=0.000224185;SGB=-0.693147;RPB=0.910227;MQB=1;MQSB=1;BQB=0.998026;MQ0F=0;ICB=1;HOB=0.5;AC=1;AN=2;DP4=6,13,17,37;MQ=20	GT:PL	0/1:139,0,52
Ref_Crab_Transcript_3485_487	383	A	G	79	DP=41;VDB=6.27327e-08;SGB=-0.692352;RPB=0.610742;MQB=1;MQSB=1;BQB=0.040184;MQ0F=0;ICB=1;HOB=0.5;AC=1;AN=2;DP4=2,8,3,18;MQ=20	GT:PL	0/1:112,0,61
Ref_Crab_Transcript_3540_930	828	T	G	51	DP=73;VDB=2.53974e-07;SGB=-0.692562;RPB=2.38383e-10;MQB=1;MQSB=1;BQB=0.646798;MQ0F=0;ICB=1;HOB=0.5;AC=1;AN=2;DP4=8,39,12,10;MQ=20	GT:PL	0/1:84,0,137
Ref_Crab_Transcript_3557_340	313	T	C	36.2677	DP=18;VDB=0.00575495;SGB=-0.636426;RPB=0.148858;MQB=1;MQSB=1;BQB=0.650664;MQ0F=0;ICB=1;HOB=0.5;AC=1;AN=2;DP4=4,6,3,4;MQ=20	GT:PL	0/1:69,0,101
Ref_Crab_Transcript_3557_340	316	C	T	67	DP=18;VDB=0.000228073;SGB=-0.670168;RPB=0.437414;MQB=1;MQSB=1;BQB=0.76338;MQ0F=0;ICB=1;HOB=0.5;AC=1;AN=2;DP4=2,3,4,6;MQ=20	GT:PL	0/1:100,0,46
Ref_Crab_Transcript_3568_521	327	G	A	36.0711	DP=11;VDB=0.00611948;SGB=-0.636426;RPB=0.562708;MQB=0.964642;MQSB=1;BQB=0.562708;MQ0F=0;ICB=1;HOB=0.5;AC=1;AN=2;DP4=3,1,6,1;MQ=20	GT:PL	0/1:69,0,39
Ref_Crab_Transcript_3582_829	215	T	C	33.2776	DP=10;VDB=0.168702;SGB=-0.616816;RPB=0.559863;MQB=1.00775;MQSB=1.00775;BQB=0.895781;MQ0F=0;ICB=1;HOB=0.5;AC=1;AN=2;DP4=2,2,2,4;MQ=20	GT:PL	0/1:66,0,45
Ref_Crab_Transcript_3594_300	178	T	C	38.3687	DP=11;VDB=0.320361;SGB=-0.616816;RPB=0.0297172;MQB=0.950952;MQSB=0.950952;BQB=0.8618;MQ0F=0;ICB=1;HOB=0.5;AC=1;AN=2;DP4=3,2,3,3;MQ=20	GT:PL	0/1:71,0,57
Ref_Crab_Transcript_3597_438	192	G	T	42.1511	DP=17;VDB=0.17274;SGB=-0.670168;RPB=0.948436;MQB=1;MQSB=1;BQB=0.779947;MQ0F=0;ICB=1;HOB=0.5;AC=1;AN=2;DP4=1,5,1,9;MQ=20	GT:PL	0/1:75,0,52
Ref_Crab_Transcript_3602_722	131	G	A	51	DP=16;VDB=0.920438;SGB=-0.651104;RPB=0.998622;MQB=1;MQSB=1;BQB=0.819936;MQ0F=0;ICB=1;HOB=0.5;AC=1;AN=2;DP4=4,4,4,4;MQ=20	GT:PL	0/1:84,0,84
Ref_Crab_Transcript_3615_404	205	G	T	74	DP=18;VDB=0.253803;SGB=-0.676189;RPB=0.817948;MQB=1;MQSB=1;BQB=0.883327;MQ0F=0;ICB=1;HOB=0.5;AC=1;AN=2;DP4=3,4,5,6;MQ=20	GT:PL	0/1:107,0,67
Ref_Crab_Transcript_3615_404	293	G	A	34.1858	DP=18;VDB=0.551097;SGB=-0.636426;RPB=0.998975;MQB=1;MQSB=1;BQB=0.990815;MQ0F=0;ICB=1;HOB=0.5;AC=1;AN=2;DP4=6,5,3,4;MQ=20	GT:PL	0/1:67,0,107
Ref_Crab_Transcript_3671_491	185	G	A	67	DP=17;VDB=0.38593;SGB=-0.670168;RPB=0.836992;MQB=1;MQSB=1;BQB=0.749585;MQ0F=0;ICB=1;HOB=0.5;AC=1;AN=2;DP4=4,2,6,4;MQ=20	GT:PL	0/1:100,0,56
Ref_Crab_Transcript_3671_491	197	T	A	74	DP=17;VDB=0.830722;SGB=-0.676189;RPB=0.833753;MQB=1;MQSB=1;BQB=0.833753;MQ0F=0;ICB=1;HOB=0.5;AC=1;AN=2;DP4=3,3,5,6;MQ=20	GT:PL	0/1:107,0,51
Ref_Crab_Transcript_3675_819	74	G	C	42.2822	DP=12;VDB=0.81988;SGB=-0.636426;RPB=0.760054;MQB=0.95494;MQSB=1;BQB=0.253351;MQ0F=0;ICB=1;HOB=0.5;AC=1;AN=2;DP4=4,1,5,2;MQ=20	GT:PL	0/1:75,0,49
Ref_Crab_Transcript_3718_421	120	A	G	81	DP=23;VDB=0.129975;SGB=-0.683931;RPB=0.855757;MQB=1;MQSB=1;BQB=0.22142;MQ0F=0;ICB=1;HOB=0.5;AC=1;AN=2;DP4=5,5,7,6;MQ=20	GT:PL	0/1:114,0,89
Ref_Crab_Transcript_3729_344	244	G	A	63	DP=10;VDB=0.30506;SGB=-0.616816;RPB=-;MQB=-;MQSB=1;BQB=-;MQ0F=0;ICB=-;HOB=-;AC=2;AN=2;DP4=0,0,4,2;MQ=20	GT:PL	1/1:90,18,0
Ref_Crab_Transcript_3843_543	156	C	T	53	DP=22;VDB=0.0807262;SGB=-0.676189;RPB=0.885602;MQB=1;MQSB=1;BQB=0.818054;MQ0F=0;ICB=1;HOB=0.5;AC=1;AN=2;DP4=6,4,8,3;MQ=20	GT:PL	0/1:86,0,91
Ref_Crab_Transcript_3923_1026	487	A	G	31.879	DP=27;VDB=0.390068;SGB=-0.662043;RPB=0.81328;MQB=1;MQSB=1;BQB=0.197825;MQ0F=0;ICB=1;HOB=0.5;AC=1;AN=2;DP4=9,9,3,6;MQ=20	GT:PL	0/1:65,0,135
Ref_Crab_Transcript_3945_789	421	A	G	126	DP=53;VDB=0.235605;SGB=-0.693079;RPB=0.802547;MQB=0.817081;MQSB=0.993844;BQB=0.741265;MQ0F=0;ICB=1;HOB=0.5;AC=1;AN=2;DP4=11,12,11,18;MQ=20	GT:PL	0/1:159,0,124
Ref_Crab_Transcript_3975_3769	1184	T	C	41.9528	DP=41;VDB=0.254982;SGB=-0.680642;RPB=0.99263;MQB=1;MQSB=1;BQB=0.775867;MQ0F=0;ICB=1;HOB=0.5;AC=1;AN=2;DP4=11,12,8,4;MQ=20	GT:PL	0/1:75,0,144
Ref_Crab_Transcript_3975_3769	1211	C	G	105	DP=41;VDB=0.748172;SGB=-0.692717;RPB=0.574205;MQB=1;MQSB=1;BQB=0.947531;MQ0F=0;ICB=1;HOB=0.5;AC=1;AN=2;DP4=13,4,12,11;MQ=20	GT:PL	0/1:138,0,91
Ref_Crab_Transcript_3992_419	274	G	T	38.2283	DP=10;VDB=0.688859;SGB=-0.616816;RPB=0.895781;MQB=1.00775;MQSB=0.916482;BQB=0.559863;MQ0F=0;ICB=1;HOB=0.5;AC=1;AN=2;DP4=3,1,4,2;MQ=20	GT:PL	0/1:71,0,42
Ref_Crab_Transcript_3997_1995	96	C	A	49.0022	DP=43;VDB=0.34069;SGB=-0.686358;RPB=0.844546;MQB=1;MQSB=1;BQB=0.952518;MQ0F=0;ICB=1;HOB=0.5;AC=1;AN=2;DP4=17,9,9,5;MQ=20	GT:PL	0/1:82,0,131
Ref_Crab_Transcript_3997_1995	97	A	G	44.8928	DP=45;VDB=0.34069;SGB=-0.686358;RPB=0.654635;MQB=1;MQSB=1;BQB=0.999911;MQ0F=0;ICB=1;HOB=0.5;AC=1;AN=2;DP4=17,11,9,5;MQ=20	GT:PL	0/1:78,0,138
Ref_Crab_Transcript_3997_1995	431	G	A	35.6696	DP=77;VDB=0.584918;SGB=-0.692717;RPB=0.301264;MQB=1;MQSB=1;BQB=0.45817;MQ0F=0;ICB=1;HOB=0.5;AC=1;AN=2;DP4=32,21,15,8;MQ=20	GT:PL	0/1:69,0,131
Ref_Crab_Transcript_3997_1995	458	G	A	74	DP=90;VDB=0.279802;SGB=-0.693132;RPB=0.0404149;MQB=1;MQSB=1;BQB=0.695119;MQ0F=0;ICB=1;HOB=0.5;AC=1;AN=2;DP4=32,23,20,14;MQ=20	GT:PL	0/1:107,0,139
Ref_Crab_Transcript_3997_1995	1266	G	A	41.1154	DP=3290;VDB=0.254333;SGB=-0.693147;RPB=0.9479;MQB=1;MQSB=1;BQB=0.284406;MQ0F=0;ICB=1;HOB=0.5;AC=1;AN=2;DP4=1015,998,563,636;MQ=20	GT:PL	0/1:74,0,134
Ref_Crab_Transcript_3999_504	161	G	A	71	DP=35;VDB=0.712723;SGB=-0.69168;RPB=0.999399;MQB=1;MQSB=1;BQB=0.429186;MQ0F=0;ICB=1;HOB=0.5;AC=1;AN=2;DP4=12,3,15,4;MQ=20	GT:PL	0/1:104,0,86
Ref_Crab_Transcript_4031_303	1	A	C	74	DP=14;VDB=2.26006e-08;SGB=-0.680642;RPB=1;MQB=1;MQSB=1;BQB=0.166667;MQ0F=0;ICB=-;HOB=-;AC=2;AN=2;DP4=0,2,4,8;MQ=20	GT:PL	1/1:101,0,1
Ref_Crab_Transcript_4064_2087	1812	A	G	105	DP=247;VDB=0.498146;SGB=-0.693147;RPB=0.254232;MQB=1;MQSB=1;BQB=0.996155;MQ0F=0;ICB=1;HOB=0.5;AC=1;AN=2;DP4=68,61,60,54;MQ=20	GT:PL	0/1:138,0,149
Ref_Crab_Transcript_4073_902	439	C	T	49.2448	DP=3300;VDB=0.383306;SGB=-0.693147;RPB=0.842869;MQB=1;MQSB=1;BQB=0;MQ0F=0;ICB=1;HOB=0.5;AC=1;AN=2;DP4=1048,863,685,630;MQ=20	GT:PL	0/1:82,0,135
Ref_Crab_Transcript_4076_384	34	G	A	104	DP=12;VDB=1.06637e-05;SGB=-0.676189;RPB=-;MQB=-;MQSB=0.954207;BQB=-;MQ0F=0;ICB=-;HOB=-;AC=2;AN=2;DP4=0,0,8,3;MQ=20	GT:PL	1/1:131,33,0
Ref_Crab_Transcript_4076_384	37	C	T	123	DP=13;VDB=1.45452e-05;SGB=-0.683931;RPB=-;MQB=-;MQSB=0.935229;BQB=-;MQ0F=0;ICB=-;HOB=-;AC=2;AN=2;DP4=0,0,8,5;MQ=20	GT:PL	1/1:150,39,0
Ref_Crab_Transcript_4076_384	57	G	T	127	DP=15;VDB=0.000167995;SGB=-0.686358;RPB=-;MQB=-;MQSB=0.945959;BQB=-;MQ0F=0;ICB=-;HOB=-;AC=2;AN=2;DP4=0,0,9,5;MQ=20	GT:PL	1/1:154,42,0
Ref_Crab_Transcript_4098_974	478	T	A	48.7179	DP=96;VDB=0.206138;SGB=-0.692352;RPB=0.993655;MQB=1;MQSB=1;BQB=0.0585038;MQ0F=0;ICB=1;HOB=0.5;AC=1;AN=2;DP4=20,27,9,12;MQ=20	GT:PL	0/1:82,0,147
Ref_Crab_Transcript_4141_959	493	G	A	66	DP=648;VDB=0.954849;SGB=-0.693147;RPB=0.435449;MQB=1;MQSB=1;BQB=0.939828;MQ0F=0;ICB=1;HOB=0.5;AC=1;AN=2;DP4=119,239,87,183;MQ=20	GT:PL	0/1:99,0,156
Ref_Crab_Transcript_4168_565	138	C	T	84	DP=143;VDB=0.00854305;SGB=-0.693147;RPB=0.00392743;MQB=1;MQSB=1;BQB=0.0804073;MQ0F=0;ICB=1;HOB=0.5;AC=1;AN=2;DP4=37,14,65,20;MQ=20	GT:PL	0/1:117,0,85
Ref_Crab_Transcript_4178_413	130	T	A	117	DP=24;VDB=0.702467;SGB=-0.691153;RPB=0.664254;MQB=1;MQSB=1;BQB=0.85832;MQ0F=0;ICB=-;HOB=-;AC=2;AN=2;DP4=0,3,8,10;MQ=20	GT:PL	1/1:144,8,0
Ref_Crab_Transcript_4197_311	193	T	C	111	DP=200;VDB=0.519839;SGB=-0.693147;RPB=0.932837;MQB=1;MQSB=1;BQB=0.611739;MQ0F=0;ICB=1;HOB=0.5;AC=1;AN=2;DP4=36,69,25,65;MQ=20	GT:PL	0/1:144,0,157
Ref_Crab_Transcript_4227_1699	1334	C	A	46.0327	DP=33;VDB=0.972873;SGB=-0.680642;RPB=0.991458;MQB=1;MQSB=1;BQB=0.532458;MQ0F=0;ICB=1;HOB=0.5;AC=1;AN=2;DP4=8,13,7,5;MQ=20	GT:PL	0/1:79,0,140
Ref_Crab_Transcript_4238_859	382	G	T	51	DP=20;VDB=0.166412;SGB=-0.662043;RPB=0.901319;MQB=1;MQSB=1;BQB=0.901319;MQ0F=0;ICB=1;HOB=0.5;AC=1;AN=2;DP4=9,2,5,4;MQ=20	GT:PL	0/1:84,0,85
Ref_Crab_Transcript_4241_469	3	T	A	65	DP=19;VDB=2.26006e-08;SGB=-0.676189;RPB=0.0161635;MQB=1;MQSB=1;BQB=0.948127;MQ0F=0;ICB=1;HOB=0.5;AC=1;AN=2;DP4=1,3,8,3;MQ=20	GT:PL	0/1:99,0,29
Ref_Crab_Transcript_4245_338	4	G	A	67	DP=16;VDB=9.50611e-05;SGB=-0.636426;RPB=1;MQB=1;MQSB=0.900802;BQB=1;MQ0F=0;ICB=-;HOB=-;AC=2;AN=2;DP4=1,0,4,3;MQ=20	GT:PL	1/1:94,9,0
Ref_Crab_Transcript_4259_398	92	A	G	36.677	DP=59;VDB=0.991993;SGB=-0.690438;RPB=0.985773;MQB=1;MQSB=1;BQB=0.725057;MQ0F=0;ICB=1;HOB=0.5;AC=1;AN=2;DP4=21,18,11,6;MQ=20	GT:PL	0/1:70,0,143
Ref_Crab_Transcript_4333_453	212	A	G	91	DP=57;VDB=0.11186;SGB=-0.692831;RPB=0.794204;MQB=1;MQSB=1;BQB=0.590309;MQ0F=0;ICB=1;HOB=0.5;AC=1;AN=2;DP4=12,19,9,15;MQ=20	GT:PL	0/1:124,0,146
Ref_Crab_Transcript_4337_1364	809	C	A	55	DP=117;VDB=0.618008;SGB=-0.693147;RPB=0.529341;MQB=1;MQSB=1;BQB=2.64448e-15;MQ0F=0;ICB=1;HOB=0.5;AC=1;AN=2;DP4=21,29,24,28;MQ=20	GT:PL	0/1:88,0,140
Ref_Crab_Transcript_4361_858	230	A	T	61	DP=16;VDB=0.726018;SGB=-0.662043;RPB=0.476686;MQB=1;MQSB=1;BQB=0.965592;MQ0F=0;ICB=1;HOB=0.5;AC=1;AN=2;DP4=1,6,4,5;MQ=20	GT:PL	0/1:94,0,62
Ref_Crab_Transcript_4387_1278	722	T	C	77	DP=42;VDB=0.625679;SGB=-0.69168;RPB=0.92151;MQB=1;MQSB=1;BQB=0.862779;MQ0F=0;ICB=1;HOB=0.5;AC=1;AN=2;DP4=7,16,5,14;MQ=20	GT:PL	0/1:110,0,134
Ref_Crab_Transcript_4410_520	25	A	T	65	DP=15;VDB=0.00189695;SGB=-0.636426;RPB=-;MQB=-;MQSB=1;BQB=-;MQ0F=0;ICB=-;HOB=-;AC=2;AN=2;DP4=0,0,1,6;MQ=20	GT:PL	1/1:92,21,0
Ref_Crab_Transcript_4410_520	26	A	T	30.2054	DP=16;VDB=0.0649539;SGB=-0.511536;RPB=-;MQB=-;MQSB=1;BQB=-;MQ0F=0;ICB=-;HOB=-;AC=2;AN=2;DP4=0,0,1,2;MQ=20	GT:PL	1/1:57,9,0
Ref_Crab_Transcript_4439_697	274	A	G	70	DP=15;VDB=0.814818;SGB=-0.670168;RPB=0.816687;MQB=1;MQSB=1;BQB=0.913931;MQ0F=0;ICB=1;HOB=0.5;AC=1;AN=2;DP4=2,2,3,7;MQ=20	GT:PL	0/1:103,0,34
Ref_Crab_Transcript_4476_610	344	G	A	31.3177	DP=14;VDB=0.266887;SGB=-0.616816;RPB=0.94925;MQB=1;MQSB=1;BQB=0.625784;MQ0F=0;ICB=1;HOB=0.5;AC=1;AN=2;DP4=5,3,3,3;MQ=20	GT:PL	0/1:64,0,85
Ref_Crab_Transcript_4528_441	313	A	G	59	DP=12;VDB=0.405689;SGB=-0.651104;RPB=0.793923;MQB=1;MQSB=0.982603;BQB=0.087379;MQ0F=0;ICB=1;HOB=0.5;AC=1;AN=2;DP4=2,2,4,4;MQ=20	GT:PL	0/1:92,0,39
Ref_Crab_Transcript_4580_428	113	G	A	52	DP=18;VDB=0.228571;SGB=-0.662043;RPB=0.975928;MQB=1;MQSB=1;BQB=0.151535;MQ0F=0;ICB=1;HOB=0.5;AC=1;AN=2;DP4=5,4,5,4;MQ=20	GT:PL	0/1:85,0,89
Ref_Crab_Transcript_4587_421	1	A	G	44.4616	DP=10;VDB=1.33331e-05;SGB=-0.651104;RPB=1;MQB=1;MQSB=1;BQB=0.5625;MQ0F=0;ICB=1;HOB=0.5;AC=1;AN=2;DP4=2,0,6,2;MQ=20	GT:PL	0/1:77,0,10
Ref_Crab_Transcript_4597_543	202	A	T	33.406	DP=12;VDB=0.106656;SGB=-0.616816;RPB=0.931779;MQB=0.982603;MQSB=1;BQB=0.47436;MQ0F=0;ICB=1;HOB=0.5;AC=1;AN=2;DP4=4,2,4,2;MQ=20	GT:PL	0/1:66,0,66
Ref_Crab_Transcript_4621_337	159	T	A	60	DP=11;VDB=0.00350122;SGB=-0.651104;RPB=0.829029;MQB=1;MQSB=0.950952;BQB=0.655816;MQ0F=0;ICB=1;HOB=0.5;AC=1;AN=2;DP4=2,1,4,4;MQ=20	GT:PL	0/1:94,0,25
Ref_Crab_Transcript_4621_337	198	A	G	41.3851	DP=15;VDB=0.136063;SGB=-0.636426;RPB=0.785785;MQB=1;MQSB=1;BQB=0.720273;MQ0F=0;ICB=1;HOB=0.5;AC=1;AN=2;DP4=4,4,3,4;MQ=20	GT:PL	0/1:74,0,86
Ref_Crab_Transcript_4621_337	234	T	C	47.0703	DP=11;VDB=0.0219768;SGB=-0.636426;RPB=0.763675;MQB=0.964642;MQSB=0.950952;BQB=0.924449;MQ0F=0;ICB=1;HOB=0.5;AC=1;AN=2;DP4=3,1,2,5;MQ=20	GT:PL	0/1:80,0,39
Ref_Crab_Transcript_4633_331	206	A	G	35.3693	DP=11;VDB=0.0411825;SGB=-0.616816;RPB=0.742931;MQB=0.950952;MQSB=0.950952;BQB=0.683497;MQ0F=0;ICB=1;HOB=0.5;AC=1;AN=2;DP4=2,3,4,2;MQ=20	GT:PL	0/1:68,0,57
Ref_Crab_Transcript_4684_998	460	T	C	43.0484	DP=10;VDB=0.00396583;SGB=-0.651104;RPB=0.25;MQB=1;MQSB=1;BQB=0.875;MQ0F=0;ICB=1;HOB=0.5;AC=1;AN=2;DP4=2,0,7,1;MQ=20	GT:PL	0/1:75,0,8
Ref_Crab_Transcript_4719_404	173	A	T	33.3826	DP=13;VDB=0.902575;SGB=-0.616816;RPB=0.623736;MQB=0.961166;MQSB=1;BQB=0.0715762;MQ0F=0;ICB=1;HOB=0.5;AC=1;AN=2;DP4=5,2,3,3;MQ=20	GT:PL	0/1:66,0,73
Ref_Crab_Transcript_4747_572	171	C	T	50	DP=11;VDB=0.836419;SGB=-0.636426;RPB=0.361741;MQB=0.964642;MQSB=0.950952;BQB=0.643095;MQ0F=0;ICB=1;HOB=0.5;AC=1;AN=2;DP4=2,2,3,4;MQ=20	GT:PL	0/1:83,0,42
Ref_Crab_Transcript_4765_834	152	T	A	48.2583	DP=23;VDB=0.548442;SGB=-0.662043;RPB=0.666074;MQB=1;MQSB=1;BQB=0.973056;MQ0F=0;ICB=1;HOB=0.5;AC=1;AN=2;DP4=6,7,4,5;MQ=20	GT:PL	0/1:81,0,117
Ref_Crab_Transcript_4790_408	265	T	C	126	DP=25;VDB=1.11667e-12;SGB=-0.692562;RPB=0.027864;MQB=1;MQSB=1;BQB=0.112442;MQ0F=0;ICB=-;HOB=-;AC=2;AN=2;DP4=1,2,7,15;MQ=20	GT:PL	1/1:153,16,0
Ref_Crab_Transcript_4790_408	268	C	T	99	DP=26;VDB=1.55564e-13;SGB=-0.692352;RPB=0.122456;MQB=1;MQSB=1;BQB=0.114498;MQ0F=0;ICB=1;HOB=0.5;AC=1;AN=2;DP4=2,3,6,15;MQ=20	GT:PL	0/1:133,0,15
Ref_Crab_Transcript_4790_408	269	A	G	99	DP=26;VDB=1.11667e-12;SGB=-0.692562;RPB=0.328363;MQB=1;MQSB=1;BQB=0.346027;MQ0F=0;ICB=-;HOB=-;AC=2;AN=2;DP4=1,3,7,15;MQ=20	GT:PL	1/1:126,0,0
Ref_Crab_Transcript_4790_408	270	T	C	126	DP=26;VDB=2.24387e-12;SGB=-0.692562;RPB=0.027864;MQB=1;MQSB=1;BQB=0.342733;MQ0F=0;ICB=-;HOB=-;AC=2;AN=2;DP4=1,2,7,15;MQ=20	GT:PL	1/1:153,16,0
Ref_Crab_Transcript_4790_408	275	T	C	97	DP=27;VDB=1.06364e-11;SGB=-0.692067;RPB=0.314263;MQB=1;MQSB=1;BQB=0.642527;MQ0F=0;ICB=1;HOB=0.5;AC=1;AN=2;DP4=3,4,5,15;MQ=20	GT:PL	0/1:131,0,43
Ref_Crab_Transcript_4790_408	280	G	A	128	DP=27;VDB=6.32294e-12;SGB=-0.692717;RPB=0.0269349;MQB=1;MQSB=1;BQB=0.332121;MQ0F=0;ICB=-;HOB=-;AC=2;AN=2;DP4=1,2,7,16;MQ=20	GT:PL	1/1:155,19,0
Ref_Crab_Transcript_4790_408	284	C	T	102	DP=28;VDB=2.30677e-12;SGB=-0.692352;RPB=0.097468;MQB=1;MQSB=1;BQB=0.0371602;MQ0F=0;ICB=1;HOB=0.5;AC=1;AN=2;DP4=2,4,6,15;MQ=20	GT:PL	0/1:136,0,27
Ref_Crab_Transcript_4790_408	297	C	T	102	DP=32;VDB=1.55564e-13;SGB=-0.692352;RPB=0.114244;MQB=1;MQSB=1;BQB=0.480854;MQ0F=0;ICB=1;HOB=0.5;AC=1;AN=2;DP4=5,6,6,15;MQ=20	GT:PL	0/1:135,0,78
Ref_Crab_Transcript_4790_408	309	G	T	163	DP=33;VDB=3.96791e-05;SGB=-0.69311;RPB=0.0322581;MQB=1;MQSB=1;BQB=0.225806;MQ0F=0;ICB=-;HOB=-;AC=2;AN=2;DP4=0,2,11,20;MQ=20	GT:PL	1/1:190,60,0
Ref_Crab_Transcript_4790_408	333	A	G	96	DP=31;VDB=1.0085e-11;SGB=-0.692067;RPB=0.0113362;MQB=1;MQSB=1;BQB=0.986456;MQ0F=0;ICB=1;HOB=0.5;AC=1;AN=2;DP4=5,6,5,15;MQ=20	GT:PL	0/1:129,0,81
Ref_Crab_Transcript_4790_408	339	C	T	97	DP=31;VDB=1.0085e-11;SGB=-0.692067;RPB=0.00012341;MQB=1;MQSB=1;BQB=0.218469;MQ0F=0;ICB=1;HOB=0.5;AC=1;AN=2;DP4=4,5,5,15;MQ=20	GT:PL	0/1:130,0,63
Ref_Crab_Transcript_4790_408	348	T	A	101	DP=30;VDB=1.45252e-13;SGB=-0.692352;RPB=0.000106735;MQB=1;MQSB=1;BQB=0.00340054;MQ0F=0;ICB=1;HOB=0.5;AC=1;AN=2;DP4=4,5,6,15;MQ=20	GT:PL	0/1:134,0,61
Ref_Crab_Transcript_4800_690	80	G	A	35.3698	DP=11;VDB=0.0044139;SGB=-0.616816;RPB=0.8618;MQB=0.950952;MQSB=1;BQB=0.891517;MQ0F=0;ICB=1;HOB=0.5;AC=1;AN=2;DP4=5,0,4,2;MQ=20	GT:PL	0/1:68,0,44
Ref_Crab_Transcript_4826_3313	770	A	G	44.0345	DP=28;VDB=0.690639;SGB=-0.670168;RPB=0.901464;MQB=1;MQSB=1;BQB=0.47359;MQ0F=0;ICB=1;HOB=0.5;AC=1;AN=2;DP4=13,5,4,6;MQ=20	GT:PL	0/1:77,0,116
Ref_Crab_Transcript_4826_3313	978	C	T	57	DP=103;VDB=0.593748;SGB=-0.693141;RPB=0.35956;MQB=1;MQSB=1;BQB=0.731963;MQ0F=0;ICB=1;HOB=0.5;AC=1;AN=2;DP4=40,25,25,12;MQ=20	GT:PL	0/1:90,0,132
Ref_Crab_Transcript_4860_742	666	A	G	69	DP=24;VDB=0.00197483;SGB=-0.680642;RPB=0.898803;MQB=1;MQSB=1;BQB=0.913101;MQ0F=0;ICB=1;HOB=0.5;AC=1;AN=2;DP4=3,6,8,4;MQ=20	GT:PL	0/1:102,0,81
Ref_Crab_Transcript_4951_608	484	T	C	36.6272	DP=10;VDB=0.0140848;SGB=-0.636426;RPB=0.274945;MQB=0.916482;MQSB=1;BQB=0.824834;MQ0F=0;ICB=1;HOB=0.5;AC=1;AN=2;DP4=2,1,6,1;MQ=20	GT:PL	0/1:70,0,26
Ref_Crab_Transcript_4959_676	338	T	C	99	DP=94;VDB=0.00519322;SGB=-0.693147;RPB=0.404143;MQB=0.159384;MQSB=0.992431;BQB=0.0471458;MQ0F=0;ICB=1;HOB=0.5;AC=1;AN=2;DP4=24,18,32,20;MQ=21	GT:PL	0/1:132,0,203
Ref_Crab_Transcript_4978_495	181	G	A	38.2279	DP=10;VDB=0.824688;SGB=-0.616816;RPB=0.503877;MQB=1.00775;MQSB=1.00775;BQB=1.00775;MQ0F=0;ICB=1;HOB=0.5;AC=1;AN=2;DP4=2,2,4,2;MQ=20	GT:PL	0/1:71,0,45
Ref_Crab_Transcript_5161_1036	568	C	T	38.4047	DP=14;VDB=0.150745;SGB=-0.636426;RPB=0.777382;MQB=0.966012;MQSB=1;BQB=0.148617;MQ0F=0;ICB=1;HOB=0.5;AC=1;AN=2;DP4=5,2,5,2;MQ=20	GT:PL	0/1:71,0,71
Ref_Crab_Transcript_5185_410	175	T	C	53	DP=10;VDB=0.86488;SGB=-0.636426;RPB=0.641538;MQB=0.916482;MQSB=1.00775;BQB=0.916482;MQ0F=0;ICB=1;HOB=0.5;AC=1;AN=2;DP4=1,2,3,4;MQ=20	GT:PL	0/1:86,0,28
Ref_Crab_Transcript_5185_410	176	G	C	53	DP=10;VDB=0.86488;SGB=-0.636426;RPB=0.641538;MQB=0.916482;MQSB=1.00775;BQB=0.824834;MQ0F=0;ICB=1;HOB=0.5;AC=1;AN=2;DP4=1,2,3,4;MQ=20	GT:PL	0/1:86,0,28
Ref_Crab_Transcript_5185_410	199	C	G	41.2278	DP=10;VDB=0.831298;SGB=-0.616816;RPB=1.00775;MQB=1.00775;MQSB=1.00775;BQB=0.895781;MQ0F=0;ICB=1;HOB=0.5;AC=1;AN=2;DP4=1,3,3,3;MQ=20	GT:PL	0/1:74,0,43
Ref_Crab_Transcript_5205_759	117	C	G	33.406	DP=12;VDB=0.799073;SGB=-0.616816;RPB=0.542126;MQB=0.982603;MQSB=1;BQB=0.931779;MQ0F=0;ICB=1;HOB=0.5;AC=1;AN=2;DP4=4,2,4,2;MQ=20	GT:PL	0/1:66,0,66
Ref_Crab_Transcript_5205_759	142	C	A	45.3726	DP=13;VDB=0.973779;SGB=-0.636426;RPB=0.828239;MQB=0.961166;MQSB=1;BQB=0.777113;MQ0F=0;ICB=1;HOB=0.5;AC=1;AN=2;DP4=4,2,4,3;MQ=20	GT:PL	0/1:78,0,62
Ref_Crab_Transcript_5227_425	142	T	A	45.2944	DP=23;VDB=0.759714;SGB=-0.670168;RPB=0.300616;MQB=1;MQSB=1;BQB=0.95306;MQ0F=0;ICB=1;HOB=0.5;AC=1;AN=2;DP4=8,5,3,7;MQ=20	GT:PL	0/1:78,0,110
Ref_Crab_Transcript_5278_1211	208	G	A	30.3542	DP=10;VDB=0.320361;SGB=-0.590765;RPB=0.730948;MQB=0.974597;MQSB=0.974597;BQB=0.649731;MQ0F=0;ICB=1;HOB=0.5;AC=1;AN=2;DP4=2,2,2,3;MQ=20	GT:PL	0/1:63,0,48
Ref_Crab_Transcript_5512_564	261	T	C	33.3377	DP=16;VDB=0.47641;SGB=-0.636426;RPB=0.994413;MQB=1;MQSB=1;BQB=0.914264;MQ0F=0;ICB=1;HOB=0.5;AC=1;AN=2;DP4=6,3,5,2;MQ=20	GT:PL	0/1:66,0,89
Ref_Crab_Transcript_5912_403	341	T	C	52	DP=11;VDB=0.0149391;SGB=-0.651104;RPB=0.0497871;MQB=1;MQSB=0.964642;BQB=0.472367;MQ0F=0;ICB=1;HOB=0.5;AC=1;AN=2;DP4=2,1,5,3;MQ=20	GT:PL	0/1:85,0,25
Ref_Crab_Transcript_6042_344	138	G	A	76	DP=17;VDB=0.462868;SGB=-0.683931;RPB=0.36729;MQB=1;MQSB=1;BQB=0.762744;MQ0F=0;ICB=1;HOB=0.5;AC=1;AN=2;DP4=3,1,9,4;MQ=20	GT:PL	0/1:110,0,23
Ref_Crab_Transcript_6073_328	108	A	T	47.3397	DP=22;VDB=0.227032;SGB=-0.670168;RPB=0.924723;MQB=1;MQSB=1;BQB=0.494431;MQ0F=0;ICB=1;HOB=0.5;AC=1;AN=2;DP4=9,3,3,7;MQ=20	GT:PL	0/1:80,0,94
Ref_Crab_Transcript_6089_525	311	T	C	88	DP=11;VDB=0.000125511;SGB=-0.676189;RPB=-;MQB=-;MQSB=1;BQB=-;MQ0F=0;ICB=-;HOB=-;AC=2;AN=2;DP4=0,0,1,10;MQ=20	GT:PL	1/1:115,33,0
Ref_Crab_Transcript_6089_525	317	T	C	88	DP=11;VDB=0.000125511;SGB=-0.676189;RPB=-;MQB=-;MQSB=1;BQB=-;MQ0F=0;ICB=-;HOB=-;AC=2;AN=2;DP4=0,0,1,10;MQ=20	GT:PL	1/1:115,33,0
Ref_Crab_Transcript_6089_525	318	C	T	88	DP=11;VDB=0.000125511;SGB=-0.676189;RPB=-;MQB=-;MQSB=1;BQB=-;MQ0F=0;ICB=-;HOB=-;AC=2;AN=2;DP4=0,0,1,10;MQ=20	GT:PL	1/1:115,33,0
Ref_Crab_Transcript_6089_525	319	C	A	88	DP=11;VDB=0.000125511;SGB=-0.676189;RPB=-;MQB=-;MQSB=1;BQB=-;MQ0F=0;ICB=-;HOB=-;AC=2;AN=2;DP4=0,0,1,10;MQ=20	GT:PL	1/1:115,33,0
Ref_Crab_Transcript_6089_525	340	T	A	88	DP=11;VDB=0.000199345;SGB=-0.676189;RPB=-;MQB=-;MQSB=1;BQB=-;MQ0F=0;ICB=-;HOB=-;AC=2;AN=2;DP4=0,0,1,10;MQ=20	GT:PL	1/1:115,33,0
Ref_Crab_Transcript_6124_359	130	T	C	67	DP=16;VDB=0.10087;SGB=-0.670168;RPB=0.0337682;MQB=1;MQSB=1;BQB=0.522814;MQ0F=0;ICB=1;HOB=0.5;AC=1;AN=2;DP4=3,3,6,4;MQ=20	GT:PL	0/1:100,0,58
Ref_Crab_Transcript_6159_971	574	A	C	55	DP=67;VDB=0.319433;SGB=-0.692562;RPB=0.98784;MQB=1;MQSB=1;BQB=0.965434;MQ0F=0;ICB=1;HOB=0.5;AC=1;AN=2;DP4=24,20,12,10;MQ=20	GT:PL	0/1:88,0,142
Ref_Crab_Transcript_6252_485	139	C	A	95	DP=12;VDB=0.356497;SGB=-0.670168;RPB=1;MQB=1;MQSB=0.950952;BQB=1;MQ0F=0;ICB=-;HOB=-;AC=2;AN=2;DP4=0,1,5,5;MQ=20	GT:PL	1/1:122,13,0
Ref_Crab_Transcript_6252_485	140	A	G	95	DP=12;VDB=0.348463;SGB=-0.670168;RPB=1;MQB=1;MQSB=0.950952;BQB=1;MQ0F=0;ICB=-;HOB=-;AC=2;AN=2;DP4=0,1,5,5;MQ=20	GT:PL	1/1:122,13,0
Ref_Crab_Transcript_6278_679	328	G	A	57	DP=13;VDB=0.452509;SGB=-0.651104;RPB=0.461115;MQB=1;MQSB=0.961166;BQB=0.461115;MQ0F=0;ICB=1;HOB=0.5;AC=1;AN=2;DP4=2,3,4,4;MQ=20	GT:PL	0/1:90,0,52
Ref_Crab_Transcript_6285_2053	949	T	A	33.3803	DP=13;VDB=0.348672;SGB=-0.616816;RPB=0.695312;MQB=0.961166;MQSB=0.961166;BQB=0.899815;MQ0F=0;ICB=1;HOB=0.5;AC=1;AN=2;DP4=3,4,3,3;MQ=20	GT:PL	0/1:66,0,79
Ref_Crab_Transcript_6285_2053	950	T	A	33.3803	DP=13;VDB=0.348672;SGB=-0.616816;RPB=0.695312;MQB=0.961166;MQSB=0.961166;BQB=0.961166;MQ0F=0;ICB=1;HOB=0.5;AC=1;AN=2;DP4=3,4,3,3;MQ=20	GT:PL	0/1:66,0,79
Ref_Crab_Transcript_6349_1011	750	C	T	31.0957	DP=20;VDB=0.0408989;SGB=-0.636426;RPB=0.447727;MQB=1;MQSB=1;BQB=0.222931;MQ0F=0;ICB=1;HOB=0.5;AC=1;AN=2;DP4=6,6,3,4;MQ=20	GT:PL	0/1:64,0,114
Ref_Crab_Transcript_6403_303	240	A	G	35.4053	DP=12;VDB=0.0137686;SGB=-0.616816;RPB=0.186356;MQB=0.982603;MQSB=0.95494;BQB=0.931779;MQ0F=0;ICB=1;HOB=0.5;AC=1;AN=2;DP4=3,3,2,4;MQ=20	GT:PL	0/1:68,0,69
Ref_Crab_Transcript_6426_523	409	C	T	50	DP=29;VDB=0.0345988;SGB=-0.676189;RPB=0.904971;MQB=1;MQSB=1;BQB=0.514728;MQ0F=0;ICB=1;HOB=0.5;AC=1;AN=2;DP4=15,2,7,4;MQ=20	GT:PL	0/1:83,0,88
Ref_Crab_Transcript_6431_608	476	A	C	59	DP=13;VDB=0.283405;SGB=-0.651104;RPB=0.793923;MQB=1;MQSB=0.982603;BQB=0.697274;MQ0F=0;ICB=1;HOB=0.5;AC=1;AN=2;DP4=2,2,4,4;MQ=20	GT:PL	0/1:92,0,39
Ref_Crab_Transcript_6518_538	380	C	T	44.4015	DP=14;VDB=0.405339;SGB=-0.636426;RPB=0.925999;MQB=0.966012;MQSB=0.966012;BQB=0.966012;MQ0F=0;ICB=1;HOB=0.5;AC=1;AN=2;DP4=4,3,3,4;MQ=20	GT:PL	0/1:77,0,71
Ref_Crab_Transcript_6587_947	182	T	G	43.4044	DP=14;VDB=0.0536475;SGB=-0.636426;RPB=0.966012;MQB=0.966012;MQSB=0.966012;BQB=0.571605;MQ0F=0;ICB=1;HOB=0.5;AC=1;AN=2;DP4=3,4,4,3;MQ=20	GT:PL	0/1:76,0,77
Ref_Crab_Transcript_6718_438	125	T	C	67	DP=20;VDB=0.056073;SGB=-0.676189;RPB=0.850154;MQB=1;MQSB=1;BQB=0.943233;MQ0F=0;ICB=1;HOB=0.5;AC=1;AN=2;DP4=7,2,7,4;MQ=20	GT:PL	0/1:100,0,74
Ref_Crab_Transcript_6718_438	279	C	T	40.2403	DP=22;VDB=0.915158;SGB=-0.662043;RPB=0.964954;MQB=1;MQSB=1;BQB=0.800143;MQ0F=0;ICB=1;HOB=0.5;AC=1;AN=2;DP4=5,8,6,3;MQ=20	GT:PL	0/1:73,0,116
Ref_Crab_Transcript_6765_400	291	G	A	39.0501	DP=25;VDB=0.453107;SGB=-0.662043;RPB=0.913799;MQB=1;MQSB=1;BQB=0.646425;MQ0F=0;ICB=1;HOB=0.5;AC=1;AN=2;DP4=4,12,3,6;MQ=20	GT:PL	0/1:72,0,120
Ref_Crab_Transcript_6766_1151	820	A	G	31.3712	DP=13;VDB=0.40105;SGB=-0.616816;RPB=0.297172;MQB=0.950952;MQSB=1;BQB=0.208021;MQ0F=0;ICB=1;HOB=0.5;AC=1;AN=2;DP4=2,3,1,5;MQ=20	GT:PL	0/1:64,0,57
Ref_Crab_Transcript_6842_769	162	A	G	61	DP=13;VDB=0.245164;SGB=-0.662043;RPB=0.898672;MQB=1;MQSB=1;BQB=0.760709;MQ0F=0;ICB=1;HOB=0.5;AC=1;AN=2;DP4=3,0,6,3;MQ=20	GT:PL	0/1:95,0,18
Ref_Crab_Transcript_6925_1117	354	T	G	34.3451	DP=14;VDB=0.839009;SGB=-0.651104;RPB=0.811936;MQB=1;MQSB=1;BQB=0.927743;MQ0F=0;ICB=1;HOB=0.5;AC=1;AN=2;DP4=3,3,7,1;MQ=20	GT:PL	0/1:67,0,64
Ref_Crab_Transcript_6925_1117	394	G	A	43.3504	DP=19;VDB=0.85857;SGB=-0.651104;RPB=0.800884;MQB=1;MQSB=1;BQB=0.46131;MQ0F=0;ICB=1;HOB=0.5;AC=1;AN=2;DP4=6,4,5,3;MQ=20	GT:PL	0/1:76,0,97
Ref_Crab_Transcript_6965_547	88	T	C	33.3803	DP=13;VDB=0.189016;SGB=-0.616816;RPB=0.695312;MQB=0.961166;MQSB=0.961166;BQB=0.961166;MQ0F=0;ICB=1;HOB=0.5;AC=1;AN=2;DP4=4,3,3,3;MQ=20	GT:PL	0/1:66,0,78
Ref_Crab_Transcript_6979_464	310	T	A	34.1858	DP=19;VDB=0.887002;SGB=-0.636426;RPB=0.793985;MQB=1;MQSB=1;BQB=0.974693;MQ0F=0;ICB=1;HOB=0.5;AC=1;AN=2;DP4=5,6,3,4;MQ=20	GT:PL	0/1:67,0,109
Ref_Crab_Transcript_6979_464	311	A	T	34.1858	DP=19;VDB=0.887002;SGB=-0.636426;RPB=0.793985;MQB=1;MQSB=1;BQB=0.86274;MQ0F=0;ICB=1;HOB=0.5;AC=1;AN=2;DP4=5,6,3,4;MQ=20	GT:PL	0/1:67,0,109
Ref_Crab_Transcript_6981_502	153	T	C	38.4047	DP=14;VDB=0.695271;SGB=-0.636426;RPB=0.714506;MQB=0.966012;MQSB=1;BQB=0.834543;MQ0F=0;ICB=1;HOB=0.5;AC=1;AN=2;DP4=6,1,5,2;MQ=20	GT:PL	0/1:71,0,63
Ref_Crab_Transcript_6982_371	160	A	G	46.3148	DP=20;VDB=0.542761;SGB=-0.651104;RPB=0.703221;MQB=1;MQSB=1;BQB=0.811936;MQ0F=0;ICB=1;HOB=0.5;AC=1;AN=2;DP4=3,3,6,2;MQ=20	GT:PL	0/1:79,0,64
Ref_Crab_Transcript_6990_458	418	G	A	37.8999	DP=33;VDB=0.00199164;SGB=-0.676189;RPB=0.993459;MQB=1;MQSB=1;BQB=0.997087;MQ0F=0;ICB=1;HOB=0.5;AC=1;AN=2;DP4=5,17,3,8;MQ=20	GT:PL	0/1:71,0,129
Ref_Crab_Transcript_7028_403	127	A	G	74	DP=97;VDB=0.000970787;SGB=-0.693139;RPB=0.986597;MQB=1;MQSB=1;BQB=0.461674;MQ0F=0;ICB=1;HOB=0.5;AC=1;AN=2;DP4=30,31,18,18;MQ=20	GT:PL	0/1:107,0,142
Ref_Crab_Transcript_7029_473	402	T	A	32.3684	DP=18;VDB=0.0313397;SGB=-0.651104;RPB=0.99606;MQB=1;MQSB=1;BQB=0.175382;MQ0F=0;ICB=1;HOB=0.5;AC=1;AN=2;DP4=6,4,1,7;MQ=20	GT:PL	0/1:65,0,94
Ref_Crab_Transcript_7062_411	126	C	T	56	DP=18;VDB=0.466689;SGB=-0.662043;RPB=0.999026;MQB=1;MQSB=1;BQB=0.996109;MQ0F=0;ICB=1;HOB=0.5;AC=1;AN=2;DP4=5,4,5,4;MQ=20	GT:PL	0/1:89,0,89
Ref_Crab_Transcript_7167_574	180	G	A	46.3893	DP=18;VDB=0.528538;SGB=-0.651104;RPB=0.457304;MQB=1;MQSB=1;BQB=0.658478;MQ0F=0;ICB=1;HOB=0.5;AC=1;AN=2;DP4=8,1,5,3;MQ=20	GT:PL	0/1:79,0,70
Ref_Crab_Transcript_7176_830	496	G	A	110	DP=53;VDB=0.993551;SGB=-0.69312;RPB=0.88191;MQB=1;MQSB=1;BQB=0.818641;MQ0F=0;ICB=1;HOB=0.5;AC=1;AN=2;DP4=6,8,13,19;MQ=20	GT:PL	0/1:143,0,75
Ref_Crab_Transcript_7205_1309	905	C	T	34.8499	DP=101;VDB=0.0222012;SGB=-0.693127;RPB=0.569723;MQB=1;MQSB=1;BQB=0.403778;MQ0F=0;ICB=1;HOB=0.5;AC=1;AN=2;DP4=45,23,24,9;MQ=20	GT:PL	0/1:68,0,123
Ref_Crab_Transcript_7205_1309	1001	G	A	100	DP=81;VDB=0.189862;SGB=-0.693139;RPB=9.58922e-05;MQB=1;MQSB=1;BQB=0.999135;MQ0F=0;ICB=1;HOB=0.5;AC=1;AN=2;DP4=13,27,9,27;MQ=20	GT:PL	0/1:133,0,146
Ref_Crab_Transcript_7205_1309	1002	G	A	105	DP=79;VDB=0.0358152;SGB=-0.693145;RPB=0.0149898;MQB=1;MQSB=1;BQB=0.923479;MQ0F=0;ICB=1;HOB=0.5;AC=1;AN=2;DP4=12,21,8,32;MQ=20	GT:PL	0/1:138,0,132
Ref_Crab_Transcript_7205_1309	1004	G	A	61	DP=78;VDB=0.302048;SGB=-0.693021;RPB=0.0178174;MQB=1;MQSB=1;BQB=0.785648;MQ0F=0;ICB=1;HOB=0.5;AC=1;AN=2;DP4=15,34,8,19;MQ=20	GT:PL	0/1:94,0,151
Ref_Crab_Transcript_7205_1309	1014	G	A	62	DP=74;VDB=0.0733724;SGB=-0.692717;RPB=0.770934;MQB=1;MQSB=1;BQB=0.242589;MQ0F=0;ICB=1;HOB=0.5;AC=1;AN=2;DP4=14,25,5,18;MQ=20	GT:PL	0/1:95,0,152
Ref_Crab_Transcript_7205_1309	1016	G	A	101	DP=69;VDB=0.0378512;SGB=-0.693147;RPB=0.53552;MQB=1;MQSB=1;BQB=0.275924;MQ0F=0;ICB=1;HOB=0.5;AC=1;AN=2;DP4=4,7,14,35;MQ=20	GT:PL	0/1:131,0,5
Ref_Crab_Transcript_7205_1309	1110	G	A	69	DP=89;VDB=0.418328;SGB=-0.69311;RPB=0.0460863;MQB=1;MQSB=1;BQB=0.491217;MQ0F=0;ICB=1;HOB=0.5;AC=1;AN=2;DP4=22,35,12,19;MQ=20	GT:PL	0/1:102,0,149
Ref_Crab_Transcript_7211_362	2	C	G	30.4141	DP=274;VDB=1.4013e-45;SGB=-0.693147;RPB=0.120002;MQB=1;MQSB=1;BQB=0.00108544;MQ0F=0;ICB=1;HOB=0.5;AC=1;AN=2;DP4=6,57,2,67;MQ=20	GT:PL	0/1:63,0,117
Ref_Crab_Transcript_7248_370	208	G	C	36.4051	DP=12;VDB=0.773942;SGB=-0.616816;RPB=0.813189;MQB=0.982603;MQSB=0.95494;BQB=0.186356;MQ0F=0;ICB=1;HOB=0.5;AC=1;AN=2;DP4=2,4,3,3;MQ=20	GT:PL	0/1:69,0,68
Ref_Crab_Transcript_7300_312	97	G	T	129	DP=16;VDB=0.0281716;SGB=-0.688148;RPB=1;MQB=1;MQSB=1;BQB=1;MQ0F=0;ICB=-;HOB=-;AC=2;AN=2;DP4=1,0,6,9;MQ=20	GT:PL	1/1:156,28,0
Ref_Crab_Transcript_7300_312	104	A	G	127	DP=12;VDB=0.394296;SGB=-0.680642;RPB=-;MQB=-;MQSB=0.95494;BQB=-;MQ0F=0;ICB=-;HOB=-;AC=2;AN=2;DP4=0,0,5,7;MQ=20	GT:PL	1/1:154,36,0
Ref_Crab_Transcript_7300_312	119	A	G	63	DP=12;VDB=0.525142;SGB=-0.662043;RPB=0.596251;MQB=1;MQSB=1;BQB=0.707404;MQ0F=0;ICB=1;HOB=0.5;AC=1;AN=2;DP4=1,2,3,6;MQ=20	GT:PL	0/1:97,0,22
Ref_Crab_Transcript_7300_312	124	A	G	54	DP=12;VDB=0.55693;SGB=-0.651104;RPB=0.360295;MQB=1;MQSB=0.964642;BQB=0.920044;MQ0F=0;ICB=1;HOB=0.5;AC=1;AN=2;DP4=1,2,3,5;MQ=20	GT:PL	0/1:87,0,25
Ref_Crab_Transcript_7300_312	125	G	C	56	DP=11;VDB=0.55693;SGB=-0.651104;RPB=0.360295;MQB=1;MQSB=0.964642;BQB=0.979382;MQ0F=0;ICB=1;HOB=0.5;AC=1;AN=2;DP4=1,2,3,5;MQ=20	GT:PL	0/1:90,0,22
Ref_Crab_Transcript_7335_661	215	G	A	45.3945	DP=22;VDB=0.972931;SGB=-0.670168;RPB=0.984624;MQB=1;MQSB=1;BQB=0.370932;MQ0F=0;ICB=1;HOB=0.5;AC=1;AN=2;DP4=9,2,8,2;MQ=20	GT:PL	0/1:78,0,83
Ref_Crab_Transcript_7382_423	146	T	A	41.228	DP=10;VDB=0.730264;SGB=-0.616816;RPB=0.727822;MQB=1.00775;MQSB=1.00775;BQB=0.279932;MQ0F=0;ICB=1;HOB=0.5;AC=1;AN=2;DP4=3,1,3,3;MQ=20	GT:PL	0/1:74,0,42
Ref_Crab_Transcript_7393_952	498	G	A	98	DP=255;VDB=0.0249404;SGB=-0.693147;RPB=0.89574;MQB=1;MQSB=1;BQB=0.552469;MQ0F=0;ICB=1;HOB=0.5;AC=1;AN=2;DP4=60,41,100,41;MQ=20	GT:PL	0/1:131,0,112
Ref_Crab_Transcript_7400_1037	313	G	C	52	DP=15;VDB=0.50952;SGB=-0.651104;RPB=0.941512;MQB=1;MQSB=1;BQB=0.322486;MQ0F=0;ICB=1;HOB=0.5;AC=1;AN=2;DP4=5,2,3,5;MQ=20	GT:PL	0/1:85,0,69
Ref_Crab_Transcript_7400_1037	317	A	C	52	DP=15;VDB=0.50952;SGB=-0.651104;RPB=0.941512;MQB=1;MQSB=1;BQB=0.616426;MQ0F=0;ICB=1;HOB=0.5;AC=1;AN=2;DP4=5,2,3,5;MQ=20	GT:PL	0/1:85,0,69
Ref_Crab_Transcript_7433_530	198	G	T	79	DP=28;VDB=0.58437;SGB=-0.686358;RPB=0.102342;MQB=1;MQSB=1;BQB=0.125315;MQ0F=0;ICB=1;HOB=0.5;AC=1;AN=2;DP4=10,3,8,6;MQ=20	GT:PL	0/1:112,0,90
Ref_Crab_Transcript_7448_335	84	G	T	30.1576	DP=13;VDB=0.0279572;SGB=-0.511536;RPB=-;MQB=-;MQSB=1;BQB=-;MQ0F=0;ICB=-;HOB=-;AC=2;AN=2;DP4=0,0,1,2;MQ=20	GT:PL	1/1:57,9,0
Ref_Crab_Transcript_7448_335	85	T	A	30.1576	DP=13;VDB=0.0279572;SGB=-0.511536;RPB=-;MQB=-;MQSB=1;BQB=-;MQ0F=0;ICB=-;HOB=-;AC=2;AN=2;DP4=0,0,1,2;MQ=20	GT:PL	1/1:57,9,0
Ref_Crab_Transcript_7448_335	101	C	T	78	DP=56;VDB=1.65336e-08;SGB=-0.692976;RPB=-;MQB=-;MQSB=1;BQB=-;MQ0F=0;ICB=-;HOB=-;AC=2;AN=2;DP4=0,0,1,25;MQ=20	GT:PL	1/1:105,78,0
Ref_Crab_Transcript_7459_669	18	C	T	30.2368	DP=74;VDB=1.96235e-06;SGB=-0.676189;RPB=0.0018289;MQB=1;MQSB=1;BQB=0.0315299;MQ0F=0;ICB=1;HOB=0.5;AC=1;AN=2;DP4=8,10,5,6;MQ=20	GT:PL	0/1:63,0,83
Ref_Crab_Transcript_7459_669	25	G	A	160	DP=102;VDB=8.10024e-28;SGB=-0.693147;RPB=0.209091;MQB=1;MQSB=1;BQB=0.690909;MQ0F=0;ICB=-;HOB=-;AC=2;AN=2;DP4=1,1,22,33;MQ=20	GT:PL	1/1:187,131,0
Ref_Crab_Transcript_7594_2037	1691	G	A	62	DP=149;VDB=0.755946;SGB=-0.693147;RPB=0.0151028;MQB=1;MQSB=1;BQB=0.283712;MQ0F=0;ICB=1;HOB=0.5;AC=1;AN=2;DP4=47,47,27,27;MQ=20	GT:PL	0/1:95,0,138
Ref_Crab_Transcript_7619_484	231	A	G	71	DP=12;VDB=0.839156;SGB=-0.670168;RPB=0.4;MQB=1;MQSB=1;BQB=1;MQ0F=0;ICB=-;HOB=-;AC=2;AN=2;DP4=2,0,7,3;MQ=20	GT:PL	1/1:99,0,2
Ref_Crab_Transcript_7626_742	399	A	G	91	DP=1912;VDB=0.274283;SGB=-0.693147;RPB=0.759774;MQB=1;MQSB=1;BQB=0.157308;MQ0F=0;ICB=-;HOB=-;AC=2;AN=2;DP4=246,208,743,690;MQ=20	GT:PL	1/1:119,84,0
Ref_Crab_Transcript_7643_863	749	G	C	117	DP=1110;VDB=9.93231e-12;SGB=-0.693147;RPB=0.985685;MQB=1;MQSB=1;BQB=0.794955;MQ0F=0;ICB=1;HOB=0.5;AC=1;AN=2;DP4=130,500,92,349;MQ=20	GT:PL	0/1:150,0,170
Ref_Crab_Transcript_7645_304	60	T	C	97	DP=43;VDB=4.49955e-06;SGB=-0.692831;RPB=0.00589442;MQB=1;MQSB=1;BQB=0.382893;MQ0F=0;ICB=1;HOB=0.5;AC=1;AN=2;DP4=1,4,7,17;MQ=20	GT:PL	0/1:129,0,8
Ref_Crab_Transcript_7645_304	65	C	G	119	DP=82;VDB=3.44825e-05;SGB=-0.693079;RPB=0.683261;MQB=1;MQSB=1;BQB=0.828109;MQ0F=0;ICB=-;HOB=-;AC=2;AN=2;DP4=2,1,7,22;MQ=20	GT:PL	1/1:146,32,0
Ref_Crab_Transcript_7645_304	66	T	A	98	DP=85;VDB=7.71479e-06;SGB=-0.693097;RPB=0.293106;MQB=1;MQSB=1;BQB=0.576229;MQ0F=0;ICB=1;HOB=0.5;AC=1;AN=2;DP4=4,5,8,22;MQ=20	GT:PL	0/1:132,0,33
Ref_Crab_Transcript_7645_304	67	C	A	98	DP=86;VDB=1.17628e-05;SGB=-0.693097;RPB=0.153336;MQB=1;MQSB=1;BQB=0.896053;MQ0F=0;ICB=1;HOB=0.5;AC=1;AN=2;DP4=4,6,8,22;MQ=20	GT:PL	0/1:132,0,47
Ref_Crab_Transcript_7645_304	70	G	A	77	DP=101;VDB=8.89512e-27;SGB=-0.693147;RPB=0.0059919;MQB=1;MQSB=1;BQB=1.0386e-07;MQ0F=0;ICB=1;HOB=0.5;AC=1;AN=2;DP4=6,19,29,25;MQ=20	GT:PL	0/1:110,0,77
Ref_Crab_Transcript_7645_304	80	G	C	145	DP=179;VDB=3.39068e-25;SGB=-0.693147;RPB=0.0206075;MQB=1;MQSB=1;BQB=0.000605805;MQ0F=0;ICB=-;HOB=-;AC=2;AN=2;DP4=5,4,51,56;MQ=20	GT:PL	1/1:172,184,0
Ref_Crab_Transcript_7645_304	83	C	T	85	DP=204;VDB=1.83211e-25;SGB=-0.693147;RPB=0.531315;MQB=1;MQSB=1;BQB=0.0193509;MQ0F=0;ICB=1;HOB=0.5;AC=1;AN=2;DP4=19,45,35,20;MQ=20	GT:PL	0/1:118,0,150
Ref_Crab_Transcript_7645_304	104	T	C	113	DP=388;VDB=4.57094e-28;SGB=-0.693147;RPB=0.0218021;MQB=1;MQSB=1;BQB=0.0021525;MQ0F=0;ICB=-;HOB=-;AC=2;AN=2;DP4=47,38,131,159;MQ=20	GT:PL	1/1:141,144,0
Ref_Crab_Transcript_7645_304	141	C	T	41.9588	DP=667;VDB=5.43011e-12;SGB=-0.693147;RPB=0.675787;MQB=0.907716;MQSB=0.962022;BQB=0.008292;MQ0F=0;ICB=1;HOB=0.5;AC=1;AN=2;DP4=257,174,111,115;MQ=20	GT:PL	0/1:75,0,110
Ref_Crab_Transcript_7645_304	160	T	C	32.5622	DP=639;VDB=1.75587e-15;SGB=-0.693147;RPB=0.636283;MQB=0.968052;MQSB=0.949525;BQB=0.0909925;MQ0F=0;ICB=1;HOB=0.5;AC=1;AN=2;DP4=256,159,83,87;MQ=20	GT:PL	0/1:66,0,105
Ref_Crab_Transcript_7645_304	193	G	C	84	DP=673;VDB=6.01392e-26;SGB=-0.693147;RPB=0;MQB=0.900548;MQSB=0.932595;BQB=0.496054;MQ0F=0;ICB=1;HOB=0.5;AC=1;AN=2;DP4=120,117,225,137;MQ=20	GT:PL	0/1:117,0,74
Ref_Crab_Transcript_7645_304	203	T	A	40.0828	DP=636;VDB=1.05671e-13;SGB=-0.693147;RPB=1.26869e-26;MQB=0.831184;MQSB=0.965049;BQB=0.000406444;MQ0F=0;ICB=1;HOB=0.5;AC=1;AN=2;DP4=209,154,136,75;MQ=20	GT:PL	0/1:73,0,126
Ref_Crab_Transcript_7645_304	208	G	A	99	DP=589;VDB=3.78974e-21;SGB=-0.693147;RPB=0;MQB=0.784696;MQSB=0.939308;BQB=1.8448e-07;MQ0F=0;ICB=1;HOB=0.5;AC=1;AN=2;DP4=141,118,159,94;MQ=20	GT:PL	0/1:132,0,137
Ref_Crab_Transcript_7645_304	218	C	A	37.1568	DP=484;VDB=0.797632;SGB=-0.693147;RPB=1.14229e-39;MQB=0.837048;MQSB=0.930782;BQB=1.69101e-13;MQ0F=0;ICB=1;HOB=0.5;AC=1;AN=2;DP4=128,116,101,85;MQ=20	GT:PL	0/1:70,0,130
Ref_Crab_Transcript_7649_2256	52	G	A	76	DP=22;VDB=0.000296712;SGB=-0.680642;RPB=0.973721;MQB=1;MQSB=1;BQB=0.553304;MQ0F=0;ICB=1;HOB=0.5;AC=1;AN=2;DP4=5,5,5,7;MQ=20	GT:PL	0/1:109,0,89
Ref_Crab_Transcript_7649_2256	81	A	G	83	DP=22;VDB=0.000297149;SGB=-0.683931;RPB=0.0882048;MQB=1;MQSB=1;BQB=0.686045;MQ0F=0;ICB=1;HOB=0.5;AC=1;AN=2;DP4=7,2,5,8;MQ=20	GT:PL	0/1:116,0,69
Ref_Crab_Transcript_7651_2315	1566	T	C	110	DP=279;VDB=0.00121401;SGB=-0.693147;RPB=0.993823;MQB=1;MQSB=1;BQB=0.820635;MQ0F=0;ICB=1;HOB=0.5;AC=1;AN=2;DP4=66,78,63,66;MQ=20	GT:PL	0/1:143,0,155
Ref_Crab_Transcript_7652_2704	782	A	G	35.9081	DP=33;VDB=0.0232599;SGB=-0.670168;RPB=0.780561;MQB=1;MQSB=1;BQB=0.780561;MQ0F=0;ICB=1;HOB=0.5;AC=1;AN=2;DP4=8,12,3,7;MQ=20	GT:PL	0/1:69,0,132
Ref_Crab_Transcript_7660_2437	1	T	C	98	DP=90;VDB=1.12104e-44;SGB=-0.693147;RPB=0.683926;MQB=1;MQSB=1;BQB=0.00187401;MQ0F=0;ICB=1;HOB=0.5;AC=1;AN=2;DP4=3,24,25,38;MQ=20	GT:PL	0/1:131,0,70
Ref_Crab_Transcript_7660_2437	2	T	C	34.7648	DP=143;VDB=1.42356e-19;SGB=-0.693143;RPB=0.999891;MQB=1;MQSB=1;BQB=0.384838;MQ0F=0;ICB=1;HOB=0.5;AC=1;AN=2;DP4=19,40,10,28;MQ=20	GT:PL	0/1:68,0,136
Ref_Crab_Transcript_7660_2437	3	G	T	65	DP=153;VDB=9.80909e-45;SGB=-0.693147;RPB=0.653679;MQB=1;MQSB=1;BQB=0.78454;MQ0F=0;ICB=1;HOB=0.5;AC=1;AN=2;DP4=9,56,24,34;MQ=20	GT:PL	0/1:98,0,121
Ref_Crab_Transcript_7665_2382	2260	G	T	96	DP=46;VDB=0.287109;SGB=-0.692562;RPB=0.994437;MQB=1;MQSB=1;BQB=0.961107;MQ0F=0;ICB=1;HOB=0.5;AC=1;AN=2;DP4=5,17,7,15;MQ=20	GT:PL	0/1:129,0,120
Ref_Crab_Transcript_7674_415	16	G	A	57	DP=20;VDB=7.55713e-05;SGB=-0.662043;RPB=0.742584;MQB=1;MQSB=0.961166;BQB=0.988166;MQ0F=0;ICB=1;HOB=0.5;AC=1;AN=2;DP4=4,0,3,6;MQ=20	GT:PL	0/1:90,0,28
Ref_Crab_Transcript_7692_484	163	A	G	119	DP=89;VDB=0.265137;SGB=-0.693147;RPB=0.817427;MQB=1;MQSB=1;BQB=0.675817;MQ0F=0;ICB=1;HOB=0.5;AC=1;AN=2;DP4=16,15,18,35;MQ=20	GT:PL	0/1:152,0,105
Ref_Crab_Transcript_7728_465	214	G	A	159	DP=54;VDB=0.0786087;SGB=-0.693147;RPB=0.720768;MQB=1;MQSB=1;BQB=0.826378;MQ0F=0;ICB=-;HOB=-;AC=2;AN=2;DP4=3,0,24,21;MQ=20	GT:PL	1/1:186,91,0
Ref_Crab_Transcript_7813_465	161	G	A	110	DP=27;VDB=7.79246e-13;SGB=-0.692831;RPB=0.395833;MQB=1;MQSB=1;BQB=0.625;MQ0F=0;ICB=-;HOB=-;AC=2;AN=2;DP4=1,1,3,21;MQ=20	GT:PL	1/1:137,38,0
Ref_Crab_Transcript_7834_413	168	C	T	49.3359	DP=16;VDB=0.00134056;SGB=-0.662043;RPB=0.965592;MQB=1;MQSB=1;BQB=0.146993;MQ0F=0;ICB=1;HOB=0.5;AC=1;AN=2;DP4=4,3,7,2;MQ=20	GT:PL	0/1:82,0,71
Ref_Crab_Transcript_7834_413	173	C	A	49.3359	DP=16;VDB=0.00134056;SGB=-0.662043;RPB=0.965592;MQB=1;MQSB=1;BQB=0.0144553;MQ0F=0;ICB=1;HOB=0.5;AC=1;AN=2;DP4=4,3,7,2;MQ=20	GT:PL	0/1:82,0,71
Ref_Crab_Transcript_7834_413	181	T	A	50	DP=15;VDB=0.00178347;SGB=-0.662043;RPB=0.939413;MQB=1;MQSB=1;BQB=0.0346967;MQ0F=0;ICB=1;HOB=0.5;AC=1;AN=2;DP4=3,3,7,2;MQ=20	GT:PL	0/1:83,0,61
Ref_Crab_Transcript_7834_413	185	G	T	50	DP=15;VDB=0.00235576;SGB=-0.662043;RPB=0.939413;MQB=1;MQSB=1;BQB=0.0815169;MQ0F=0;ICB=1;HOB=0.5;AC=1;AN=2;DP4=3,3,7,2;MQ=20	GT:PL	0/1:83,0,61
Ref_Crab_Transcript_7834_413	193	T	G	46.3148	DP=14;VDB=0.000538717;SGB=-0.651104;RPB=1;MQB=1;MQSB=1;BQB=0.981425;MQ0F=0;ICB=1;HOB=0.5;AC=1;AN=2;DP4=3,3,6,2;MQ=20	GT:PL	0/1:79,0,64
Ref_Crab_Transcript_7834_413	194	T	A	43.3405	DP=14;VDB=0.000538717;SGB=-0.651104;RPB=1;MQB=1;MQSB=1;BQB=0.991701;MQ0F=0;ICB=1;HOB=0.5;AC=1;AN=2;DP4=3,3,6,2;MQ=20	GT:PL	0/1:76,0,64
Ref_Crab_Transcript_7834_413	206	T	C	44.385	DP=15;VDB=0.000637039;SGB=-0.651104;RPB=0.898397;MQB=1;MQSB=1;BQB=0.477935;MQ0F=0;ICB=1;HOB=0.5;AC=1;AN=2;DP4=3,4,6,2;MQ=20	GT:PL	0/1:77,0,74
Ref_Crab_Transcript_7834_413	211	G	A	42.3932	DP=15;VDB=0.000692184;SGB=-0.651104;RPB=0.87319;MQB=1;MQSB=1;BQB=0.97357;MQ0F=0;ICB=1;HOB=0.5;AC=1;AN=2;DP4=3,4,6,2;MQ=20	GT:PL	0/1:75,0,74
Ref_Crab_Transcript_7855_1252	63	C	T	56	DP=84;VDB=0.000735796;SGB=-0.693146;RPB=0.791896;MQB=1;MQSB=1;BQB=0.121327;MQ0F=0;ICB=1;HOB=0.5;AC=1;AN=2;DP4=34,7,37,5;MQ=20	GT:PL	0/1:89,0,101
Ref_Crab_Transcript_7857_1087	123	C	T	52	DP=52;VDB=0.547624;SGB=-0.69168;RPB=0.385209;MQB=1;MQSB=1;BQB=0.000260648;MQ0F=0;ICB=1;HOB=0.5;AC=1;AN=2;DP4=12,9,11,8;MQ=20	GT:PL	0/1:85,0,129
Ref_Crab_Transcript_7879_430	2	G	T	85	DP=15;VDB=3.97707e-08;SGB=-0.680642;RPB=-;MQB=-;MQSB=0.95494;BQB=-;MQ0F=0;ICB=-;HOB=-;AC=2;AN=2;DP4=0,0,5,7;MQ=20	GT:PL	1/1:118,33,6
Ref_Crab_Transcript_7879_430	4	A	T	69	DP=17;VDB=4.13851e-08;SGB=-0.676189;RPB=1;MQB=1;MQSB=0.95494;BQB=1;MQ0F=0;ICB=-;HOB=-;AC=2;AN=2;DP4=1,0,4,7;MQ=20	GT:PL	1/1:96,11,0
Ref_Crab_Transcript_7879_430	253	C	T	56	DP=195;VDB=0.000870605;SGB=-0.693147;RPB=0.749199;MQB=1;MQSB=1;BQB=0.9904;MQ0F=0;ICB=1;HOB=0.5;AC=1;AN=2;DP4=47,78,20,49;MQ=20	GT:PL	0/1:89,0,141
Ref_Crab_Transcript_7924_847	414	T	C	60	DP=13;VDB=0.6331;SGB=-0.651104;RPB=0.920044;MQB=1;MQSB=0.950952;BQB=0.472367;MQ0F=0;ICB=1;HOB=0.5;AC=1;AN=2;DP4=1,2,4,4;MQ=20	GT:PL	0/1:94,0,25
Ref_Crab_Transcript_7946_1823	1715	G	A	42.649	DP=70;VDB=0.709389;SGB=-0.692352;RPB=0.721177;MQB=1;MQSB=1;BQB=0.993136;MQ0F=0;ICB=1;HOB=0.5;AC=1;AN=2;DP4=12,36,8,13;MQ=20	GT:PL	0/1:76,0,145
Ref_Crab_Transcript_7946_1823	1772	C	A	51	DP=36;VDB=0.00463645;SGB=-0.683931;RPB=0.891863;MQB=1;MQSB=1;BQB=0.834039;MQ0F=0;ICB=1;HOB=0.5;AC=1;AN=2;DP4=4,17,3,10;MQ=20	GT:PL	0/1:84,0,118
Ref_Crab_Transcript_7951_1634	1084	C	T	109	DP=149;VDB=0.171395;SGB=-0.693147;RPB=0.997265;MQB=1;MQSB=1;BQB=0.373065;MQ0F=0;ICB=1;HOB=0.5;AC=1;AN=2;DP4=20,31,33,65;MQ=20	GT:PL	0/1:142,0,86
Ref_Crab_Transcript_7969_678	127	G	A	76	DP=22;VDB=0.586032;SGB=-0.688148;RPB=0.82972;MQB=1;MQSB=1;BQB=0.0761357;MQ0F=0;ICB=1;HOB=0.5;AC=1;AN=2;DP4=4,1,11,4;MQ=20	GT:PL	0/1:110,0,28
Ref_Crab_Transcript_7969_678	151	A	G	83	DP=20;VDB=0.395505;SGB=-0.689466;RPB=0.995546;MQB=1;MQSB=1;BQB=0.751477;MQ0F=0;ICB=1;HOB=0.5;AC=1;AN=2;DP4=3,1,11,5;MQ=20	GT:PL	0/1:117,0,14
Ref_Crab_Transcript_7985_354	82	C	T	79	DP=18;VDB=0.00427538;SGB=-0.680642;RPB=0.173013;MQB=1;MQSB=1;BQB=0.99018;MQ0F=0;ICB=1;HOB=0.5;AC=1;AN=2;DP4=6,0,7,5;MQ=20	GT:PL	0/1:112,0,37
Ref_Crab_Transcript_8097_3179	1155	C	A	64	DP=148;VDB=0.00164697;SGB=-0.693147;RPB=0.641347;MQB=1;MQSB=1;BQB=0.826923;MQ0F=0;ICB=1;HOB=0.5;AC=1;AN=2;DP4=47,43,29,24;MQ=20	GT:PL	0/1:97,0,138
Ref_Crab_Transcript_8131_708	420	A	C	67	DP=19;VDB=0.983556;SGB=-0.670168;RPB=0.99606;MQB=1;MQSB=1;BQB=0.965097;MQ0F=0;ICB=1;HOB=0.5;AC=1;AN=2;DP4=5,3,5,5;MQ=20	GT:PL	0/1:100,0,76
Ref_Crab_Transcript_8138_325	301	G	A	149	DP=14;VDB=2.45767e-06;SGB=-0.686358;RPB=-;MQB=-;MQSB=0.967216;BQB=-;MQ0F=0;ICB=-;HOB=-;AC=2;AN=2;DP4=0,0,6,8;MQ=21	GT:PL	1/1:176,42,0
Ref_Crab_Transcript_8138_325	309	C	G	38.1543	DP=14;VDB=0.00766117;SGB=-0.556411;RPB=-;MQB=-;MQSB=-;BQB=-;MQ0F=0;ICB=-;HOB=-;AC=2;AN=2;DP4=0,0,0,4;MQ=21	GT:PL	1/1:65,12,0
Ref_Crab_Transcript_8170_828	180	A	G	54	DP=25;VDB=0.859382;SGB=-0.670168;RPB=0.452744;MQB=1;MQSB=1;BQB=0.403791;MQ0F=0;ICB=1;HOB=0.5;AC=1;AN=2;DP4=8,6,5,5;MQ=20	GT:PL	0/1:87,0,116
Ref_Crab_Transcript_8205_316	146	G	C	34.4097	DP=13;VDB=0.69274;SGB=-0.636426;RPB=0.777113;MQB=0.961166;MQSB=0.961166;BQB=0.828239;MQ0F=0;ICB=1;HOB=0.5;AC=1;AN=2;DP4=2,4,4,3;MQ=20	GT:PL	0/1:67,0,65
Ref_Crab_Transcript_8218_965	117	G	T	31.3253	DP=14;VDB=0.293058;SGB=-0.616816;RPB=0.927743;MQB=1;MQSB=1;BQB=0.94925;MQ0F=0;ICB=1;HOB=0.5;AC=1;AN=2;DP4=5,3,3,3;MQ=20	GT:PL	0/1:64,0,84
Ref_Crab_Transcript_8234_1034	398	G	A	30.0966	DP=19;VDB=0.347872;SGB=-0.636426;RPB=0.944459;MQB=1;MQSB=1;BQB=0.724465;MQ0F=0;ICB=1;HOB=0.5;AC=1;AN=2;DP4=5,7,4,3;MQ=20	GT:PL	0/1:63,0,114
Ref_Crab_Transcript_8315_377	47	A	G	48.282	DP=12;VDB=0.0568693;SGB=-0.636426;RPB=0.253351;MQB=0.95494;MQSB=0.982603;BQB=0.6821;MQ0F=0;ICB=1;HOB=0.5;AC=1;AN=2;DP4=3,2,3,4;MQ=20	GT:PL	0/1:81,0,54
Ref_Crab_Transcript_8316_830	134	T	C	33.3377	DP=16;VDB=0.293704;SGB=-0.636426;RPB=0.86931;MQB=1;MQSB=1;BQB=0.933674;MQ0F=0;ICB=1;HOB=0.5;AC=1;AN=2;DP4=4,5,5,2;MQ=20	GT:PL	0/1:66,0,94
Ref_Crab_Transcript_8360_1080	378	T	A	96	DP=65;VDB=0.0706749;SGB=-0.693097;RPB=0.916706;MQB=1;MQSB=1;BQB=0.48045;MQ0F=0;ICB=1;HOB=0.5;AC=1;AN=2;DP4=17,17,16,14;MQ=20	GT:PL	0/1:129,0,143
Ref_Crab_Transcript_8539_2191	1841	C	A	38.3953	DP=27;VDB=8.66831e-05;SGB=-0.662043;RPB=0.00167033;MQB=1;MQSB=1;BQB=0.116133;MQ0F=0;ICB=1;HOB=0.5;AC=1;AN=2;DP4=7,2,5,4;MQ=20	GT:PL	0/1:71,0,72
Ref_Crab_Transcript_8539_2191	1843	C	A	30.2536	DP=22;VDB=0.000110774;SGB=-0.651104;RPB=0.00180754;MQB=1;MQSB=1;BQB=0.00449879;MQ0F=0;ICB=1;HOB=0.5;AC=1;AN=2;DP4=8,2,4,4;MQ=20	GT:PL	0/1:63,0,83
Ref_Crab_Transcript_8586_640	103	G	A	41.2276	DP=10;VDB=0.679639;SGB=-0.616816;RPB=0.727822;MQB=1.00775;MQSB=0.952347;BQB=0.895781;MQ0F=0;ICB=1;HOB=0.5;AC=1;AN=2;DP4=2,2,3,3;MQ=20	GT:PL	0/1:74,0,45
Ref_Crab_Transcript_8609_2055	977	G	C	33.3803	DP=13;VDB=0.155969;SGB=-0.616816;RPB=0.695312;MQB=0.961166;MQSB=0.961166;BQB=0.531709;MQ0F=0;ICB=1;HOB=0.5;AC=1;AN=2;DP4=4,3,3,3;MQ=20	GT:PL	0/1:66,0,78
Ref_Crab_Transcript_8631_417	224	A	G	35.4053	DP=13;VDB=0.0820477;SGB=-0.616816;RPB=0.813189;MQB=0.982603;MQSB=0.95494;BQB=0.931779;MQ0F=0;ICB=1;HOB=0.5;AC=1;AN=2;DP4=3,3,2,4;MQ=20	GT:PL	0/1:68,0,69
Ref_Crab_Transcript_8668_933	617	T	A	38.8735	DP=10;VDB=0.293058;SGB=-0.616816;RPB=0.346719;MQB=0.924584;MQSB=0.974597;BQB=0.577865;MQ0F=0;ICB=1;HOB=0.5;AC=1;AN=2;DP4=1,2,4,2;MQ=20	GT:PL	0/1:72,0,29
Ref_Crab_Transcript_8700_409	138	G	T	92	DP=38;VDB=0.690688;SGB=-0.692067;RPB=0.89224;MQB=1;MQSB=1;BQB=0.254038;MQ0F=0;ICB=1;HOB=0.5;AC=1;AN=2;DP4=12,4,11,9;MQ=20	GT:PL	0/1:125,0,95
Ref_Crab_Transcript_8725_351	198	C	A	34.3994	DP=22;VDB=0.000350984;SGB=-0.651104;RPB=0.00524752;MQB=1;MQSB=1;BQB=0.0211283;MQ0F=0;ICB=1;HOB=0.5;AC=1;AN=2;DP4=5,2,1,7;MQ=20	GT:PL	0/1:67,0,69
Ref_Crab_Transcript_8757_2830	844	A	G	51	DP=29;VDB=0.0200047;SGB=-0.676189;RPB=0.808662;MQB=1;MQSB=1;BQB=0.505186;MQ0F=0;ICB=1;HOB=0.5;AC=1;AN=2;DP4=9,9,4,7;MQ=20	GT:PL	0/1:84,0,133
Ref_Crab_Transcript_8808_615	158	T	C	36.2427	DP=10;VDB=0.948809;SGB=-0.616816;RPB=0.895781;MQB=1.00775;MQSB=0.952347;BQB=0.335918;MQ0F=0;ICB=1;HOB=0.5;AC=1;AN=2;DP4=1,3,4,2;MQ=20	GT:PL	0/1:69,0,43
Ref_Crab_Transcript_8896_402	189	G	C	86	DP=104;VDB=0.204043;SGB=-0.693147;RPB=0.713877;MQB=1;MQSB=1;BQB=0.638805;MQ0F=0;ICB=1;HOB=0.5;AC=1;AN=2;DP4=15,12,40,32;MQ=20	GT:PL	0/1:120,0,51
Ref_Crab_Transcript_8947_308	182	G	A	32.4062	DP=12;VDB=0.0744703;SGB=-0.616816;RPB=0.220239;MQB=0.982603;MQSB=0.95494;BQB=0.542126;MQ0F=0;ICB=1;HOB=0.5;AC=1;AN=2;DP4=3,3,4,2;MQ=20	GT:PL	0/1:65,0,69
Ref_Crab_Transcript_8985_528	429	G	A	41.228	DP=10;VDB=0.175312;SGB=-0.616816;RPB=0.279932;MQB=1.00775;MQSB=1.00775;BQB=0.727822;MQ0F=0;ICB=1;HOB=0.5;AC=1;AN=2;DP4=3,1,3,3;MQ=20	GT:PL	0/1:74,0,42
Ref_Crab_Transcript_9145_582	248	G	A	48.4043	DP=16;VDB=0.0397095;SGB=-0.651104;RPB=0.671368;MQB=1;MQSB=1;BQB=0.819936;MQ0F=0;ICB=1;HOB=0.5;AC=1;AN=2;DP4=4,4,5,3;MQ=20	GT:PL	0/1:81,0,84
Ref_Crab_Transcript_9171_477	376	T	A	30.0966	DP=19;VDB=0.321601;SGB=-0.636426;RPB=0.795669;MQB=1;MQSB=1;BQB=0.177538;MQ0F=0;ICB=1;HOB=0.5;AC=1;AN=2;DP4=7,5,4,3;MQ=20	GT:PL	0/1:63,0,111
Ref_Crab_Transcript_9171_477	436	C	T	112	DP=12;VDB=0.0011084;SGB=-0.670168;RPB=-;MQB=-;MQSB=0.952347;BQB=-;MQ0F=0;ICB=-;HOB=-;AC=2;AN=2;DP4=0,0,5,5;MQ=20	GT:PL	1/1:139,30,0
Ref_Crab_Transcript_9177_536	166	T	C	47.0695	DP=11;VDB=0.522441;SGB=-0.636426;RPB=0.924449;MQB=0.964642;MQSB=0.964642;BQB=0.803868;MQ0F=0;ICB=1;HOB=0.5;AC=1;AN=2;DP4=2,2,2,5;MQ=20	GT:PL	0/1:80,0,42
Ref_Crab_Transcript_9181_504	365	C	T	53	DP=32;VDB=0.917614;SGB=-0.680642;RPB=0.999811;MQB=1;MQSB=1;BQB=0.482859;MQ0F=0;ICB=1;HOB=0.5;AC=1;AN=2;DP4=11,9,6,6;MQ=20	GT:PL	0/1:86,0,135
Ref_Crab_Transcript_9227_448	3	G	A	30.2479	DP=20;VDB=0.0221621;SGB=-0.511536;RPB=-;MQB=-;MQSB=1;BQB=-;MQ0F=0;ICB=-;HOB=-;AC=2;AN=2;DP4=0,0,1,2;MQ=20	GT:PL	1/1:57,9,0
Ref_Crab_Transcript_9227_448	7	G	A	51	DP=26;VDB=0.00408963;SGB=-0.616816;RPB=1;MQB=1;MQSB=1;BQB=1;MQ0F=0;ICB=-;HOB=-;AC=2;AN=2;DP4=1,0,4,2;MQ=20	GT:PL	1/1:78,2,0
Ref_Crab_Transcript_9272_396	176	T	C	32.8137	DP=29;VDB=0.27856;SGB=-0.662043;RPB=0.863812;MQB=1;MQSB=1;BQB=0.137439;MQ0F=0;ICB=1;HOB=0.5;AC=1;AN=2;DP4=5,14,4,5;MQ=20	GT:PL	0/1:66,0,130
Ref_Crab_Transcript_9421_1455	509	C	A	107	DP=6163;VDB=0.818263;SGB=-0.693147;RPB=0.000193329;MQB=1;MQSB=1;BQB=0.974987;MQ0F=0;ICB=1;HOB=0.5;AC=1;AN=2;DP4=1962,1067,1966,937;MQ=20	GT:PL	0/1:140,0,139
Ref_Crab_Transcript_9489_625	405	T	A	73	DP=42;VDB=0.991005;SGB=-0.691153;RPB=0.959107;MQB=1;MQSB=1;BQB=0.436703;MQ0F=0;ICB=1;HOB=0.5;AC=1;AN=2;DP4=11,12,12,6;MQ=20	GT:PL	0/1:106,0,139
Ref_Crab_Transcript_9498_929	207	G	A	33.7936	DP=90;VDB=0.586032;SGB=-0.693097;RPB=0.910815;MQB=1;MQSB=1;BQB=0.0299328;MQ0F=0;ICB=1;HOB=0.5;AC=1;AN=2;DP4=43,17,21,9;MQ=20	GT:PL	0/1:67,0,117
Ref_Crab_Transcript_9590_556	83	A	G	45.3786	DP=13;VDB=0.171907;SGB=-0.636426;RPB=0.245404;MQB=0.961166;MQSB=0.961166;BQB=0.961166;MQ0F=0;ICB=1;HOB=0.5;AC=1;AN=2;DP4=3,3,4,3;MQ=20	GT:PL	0/1:78,0,66
Ref_Crab_Transcript_9590_556	116	T	C	36.4051	DP=12;VDB=0.348672;SGB=-0.616816;RPB=0.864013;MQB=0.982603;MQSB=0.982603;BQB=0.931779;MQ0F=0;ICB=1;HOB=0.5;AC=1;AN=2;DP4=3,3,3,3;MQ=20	GT:PL	0/1:69,0,69
Ref_Crab_Transcript_9669_420	153	C	T	65	DP=28;VDB=0.772703;SGB=-0.683931;RPB=0.624404;MQB=1;MQSB=1;BQB=0.697274;MQ0F=0;ICB=1;HOB=0.5;AC=1;AN=2;DP4=11,3,9,4;MQ=20	GT:PL	0/1:98,0,94
Ref_Crab_Transcript_9771_430	202	G	T	61	DP=11;VDB=0.732531;SGB=-0.651104;RPB=1;MQB=1;MQSB=0.964642;BQB=0.221971;MQ0F=0;ICB=1;HOB=0.5;AC=1;AN=2;DP4=0,3,4,4;MQ=20	GT:PL	0/1:94,0,20
Ref_Crab_Transcript_9820_449	275	A	C	66	DP=17;VDB=0.0284488;SGB=-0.670168;RPB=0.0720956;MQB=1;MQSB=1;BQB=0.887766;MQ0F=0;ICB=1;HOB=0.5;AC=1;AN=2;DP4=4,3,6,4;MQ=20	GT:PL	0/1:99,0,68
Ref_Crab_Transcript_9827_459	198	T	C	61	DP=61;VDB=0.897488;SGB=-0.692352;RPB=0.478391;MQB=1;MQSB=1;BQB=0.687765;MQ0F=0;ICB=1;HOB=0.5;AC=1;AN=2;DP4=21,19,10,11;MQ=20	GT:PL	0/1:94,0,144
Ref_Crab_Transcript_9852_381	25	G	A	91	DP=10;VDB=0.00498595;SGB=-0.662043;RPB=-;MQB=-;MQSB=0.924584;BQB=-;MQ0F=0;ICB=-;HOB=-;AC=2;AN=2;DP4=0,0,6,3;MQ=20	GT:PL	1/1:118,27,0
Ref_Crab_Transcript_9861_547	55	G	A	62	DP=8007;VDB=0;SGB=-0.693147;RPB=0.0611109;MQB=1;MQSB=1;BQB=2.73037e-15;MQ0F=0;ICB=1;HOB=0.5;AC=1;AN=2;DP4=3366,229,4092,280;MQ=20	GT:PL	0/1:95,0,78
Ref_Crab_Transcript_9934_811	297	G	A	85	DP=35;VDB=0.0108879;SGB=-0.691153;RPB=0.658358;MQB=1;MQSB=1;BQB=0.647959;MQ0F=0;ICB=1;HOB=0.5;AC=1;AN=2;DP4=6,10,11,7;MQ=20	GT:PL	0/1:118,0,112
Ref_Crab_Transcript_9958_439	324	G	A	54	DP=22;VDB=0.0581053;SGB=-0.670168;RPB=0.000553084;MQB=1;MQSB=1;BQB=0.699755;MQ0F=0;ICB=1;HOB=0.5;AC=1;AN=2;DP4=8,3,5,5;MQ=20	GT:PL	0/1:87,0,91
Ref_Crab_Transcript_9958_439	357	T	G	41.4086	DP=17;VDB=0.342481;SGB=-0.651104;RPB=0.0891522;MQB=1;MQSB=1;BQB=0.381255;MQ0F=0;ICB=1;HOB=0.5;AC=1;AN=2;DP4=2,5,4,4;MQ=20	GT:PL	0/1:74,0,72
Ref_Crab_Transcript_9958_439	382	G	A	50	DP=11;VDB=0.0827521;SGB=-0.636426;RPB=0.12058;MQB=0.964642;MQSB=0.950952;BQB=0.803868;MQ0F=0;ICB=1;HOB=0.5;AC=1;AN=2;DP4=2,2,3,4;MQ=20	GT:PL	0/1:83,0,42
Ref_Crab_Transcript_9978_550	291	A	T	31.3177	DP=15;VDB=0.0630446;SGB=-0.616816;RPB=0.153355;MQB=1;MQSB=0.966012;BQB=0.875173;MQ0F=0;ICB=1;HOB=0.5;AC=1;AN=2;DP4=4,4,3,3;MQ=20	GT:PL	0/1:64,0,88
Ref_Crab_Transcript_10074_1289	1183	A	G	38.3687	DP=11;VDB=0.59895;SGB=-0.616816;RPB=0.950952;MQB=0.950952;MQSB=0.950952;BQB=0.891517;MQ0F=0;ICB=1;HOB=0.5;AC=1;AN=2;DP4=3,2,3,3;MQ=20	GT:PL	0/1:71,0,57
Ref_Crab_Transcript_10098_823	432	T	C	92	DP=89;VDB=0.0321513;SGB=-0.693139;RPB=0.909408;MQB=1;MQSB=1;BQB=0.166231;MQ0F=0;ICB=1;HOB=0.5;AC=1;AN=2;DP4=25,24,12,24;MQ=20	GT:PL	0/1:125,0,142
Ref_Crab_Transcript_10129_594	543	A	G	51	DP=10;VDB=0.00911605;SGB=-0.636426;RPB=0.641538;MQB=0.916482;MQSB=0.952347;BQB=0.824834;MQ0F=0;ICB=1;HOB=0.5;AC=1;AN=2;DP4=1,2,4,3;MQ=20	GT:PL	0/1:84,0,28
Ref_Crab_Transcript_10180_372	61	T	C	72	DP=15;VDB=0.00501405;SGB=-0.670168;RPB=0.544711;MQB=1;MQSB=1;BQB=0.728422;MQ0F=0;ICB=1;HOB=0.5;AC=1;AN=2;DP4=4,1,5,5;MQ=20	GT:PL	0/1:105,0,41
Ref_Crab_Transcript_10186_312	288	T	A	62	DP=10;VDB=0.000959691;SGB=-0.651104;RPB=-;MQB=-;MQSB=1;BQB=-;MQ0F=0;ICB=-;HOB=-;AC=2;AN=2;DP4=0,0,7,1;MQ=20	GT:PL	1/1:89,24,0
Ref_Crab_Transcript_10301_851	304	C	T	51	DP=11;VDB=0.447761;SGB=-0.636426;RPB=0.916482;MQB=0.916482;MQSB=1.00775;BQB=0.916482;MQ0F=0;ICB=1;HOB=0.5;AC=1;AN=2;DP4=1,2,3,4;MQ=20	GT:PL	0/1:84,0,28
Ref_Crab_Transcript_10325_1109	342	C	A	47.2821	DP=12;VDB=0.0931079;SGB=-0.636426;RPB=0.95494;MQB=0.95494;MQSB=1;BQB=0.896474;MQ0F=0;ICB=1;HOB=0.5;AC=1;AN=2;DP4=4,1,4,3;MQ=20	GT:PL	0/1:80,0,49
Ref_Crab_Transcript_10443_1027	833	A	G	83	DP=58;VDB=0.40589;SGB=-0.692914;RPB=0.989581;MQB=1;MQSB=1;BQB=0.593682;MQ0F=0;ICB=1;HOB=0.5;AC=1;AN=2;DP4=7,25,6,19;MQ=20	GT:PL	0/1:116,0,135
Ref_Crab_Transcript_10464_1090	839	A	T	77	DP=49;VDB=0.0424788;SGB=-0.69168;RPB=0.277037;MQB=1;MQSB=1;BQB=0.650354;MQ0F=0;ICB=1;HOB=0.5;AC=1;AN=2;DP4=11,18,8,11;MQ=20	GT:PL	0/1:110,0,148
Ref_Crab_Transcript_10526_485	106	T	C	45.3504	DP=18;VDB=0.862543;SGB=-0.651104;RPB=0.800884;MQB=1;MQSB=1;BQB=0.800884;MQ0F=0;ICB=1;HOB=0.5;AC=1;AN=2;DP4=4,6,3,5;MQ=20	GT:PL	0/1:78,0,99
Ref_Crab_Transcript_10668_704	669	C	T	94	DP=10;VDB=0.00194067;SGB=-0.651104;RPB=-;MQB=-;MQSB=0.900802;BQB=-;MQ0F=0;ICB=-;HOB=-;AC=2;AN=2;DP4=0,0,3,5;MQ=20	GT:PL	1/1:121,24,0
Ref_Crab_Transcript_10668_704	671	A	G	53	DP=10;VDB=0.00513213;SGB=-0.616816;RPB=1;MQB=1;MQSB=1;BQB=1;MQ0F=0;ICB=-;HOB=-;AC=2;AN=2;DP4=0,1,2,4;MQ=20	GT:PL	1/1:80,1,0
Ref_Crab_Transcript_10673_674	440	C	T	98	DP=22;VDB=0.433204;SGB=-0.691153;RPB=0.372912;MQB=1;MQSB=1;BQB=0.0948007;MQ0F=0;ICB=1;HOB=0.5;AC=1;AN=2;DP4=3,1,8,10;MQ=20	GT:PL	0/1:130,0,8
Ref_Crab_Transcript_10718_928	230	C	T	33.406	DP=12;VDB=0.572009;SGB=-0.616816;RPB=0.813189;MQB=0.982603;MQSB=0.95494;BQB=0.47436;MQ0F=0;ICB=1;HOB=0.5;AC=1;AN=2;DP4=3,3,4,2;MQ=20	GT:PL	0/1:66,0,69
Ref_Crab_Transcript_10719_1897	549	G	A	33.406	DP=13;VDB=0.817917;SGB=-0.616816;RPB=0.931779;MQB=0.982603;MQSB=0.95494;BQB=0.660716;MQ0F=0;ICB=1;HOB=0.5;AC=1;AN=2;DP4=3,3,4,2;MQ=20	GT:PL	0/1:66,0,69
Ref_Crab_Transcript_10721_568	1	A	C	62	DP=19;VDB=2.26006e-08;SGB=-0.686358;RPB=1;MQB=1;MQSB=1;BQB=0.760115;MQ0F=0;ICB=1;HOB=0.5;AC=1;AN=2;DP4=4,1,11,3;MQ=20	GT:PL	0/1:95,0,34
Ref_Crab_Transcript_10721_568	3	G	A	60	DP=26;VDB=2.26006e-08;SGB=-0.676189;RPB=0.916401;MQB=1;MQSB=1;BQB=0.954874;MQ0F=0;ICB=1;HOB=0.5;AC=1;AN=2;DP4=8,1,8,3;MQ=20	GT:PL	0/1:93,0,65
Ref_Crab_Transcript_10721_568	284	T	A	62	DP=127;VDB=0.0745084;SGB=-0.693146;RPB=0.21875;MQB=1;MQSB=1;BQB=0.767338;MQ0F=0;ICB=1;HOB=0.5;AC=1;AN=2;DP4=30,48,9,35;MQ=20	GT:PL	0/1:95,0,146
Ref_Crab_Transcript_10739_880	336	T	G	33.6487	DP=91;VDB=0.120371;SGB=-0.693021;RPB=0.97511;MQB=1;MQSB=1;BQB=0.983051;MQ0F=0;ICB=1;HOB=0.5;AC=1;AN=2;DP4=40,23,17,10;MQ=20	GT:PL	0/1:67,0,123
Ref_Crab_Transcript_10750_304	133	A	G	46.1122	DP=12;VDB=0.00992398;SGB=-0.556411;RPB=-;MQB=-;MQSB=1;BQB=-;MQ0F=0;ICB=-;HOB=-;AC=2;AN=2;DP4=0,0,2,2;MQ=20	GT:PL	1/1:73,12,0
Ref_Crab_Transcript_10750_304	137	T	G	46.1857	DP=16;VDB=0.00992398;SGB=-0.556411;RPB=-;MQB=-;MQSB=1;BQB=-;MQ0F=0;ICB=-;HOB=-;AC=2;AN=2;DP4=0,0,2,2;MQ=20	GT:PL	1/1:73,12,0
Ref_Crab_Transcript_10750_304	140	G	A	46.2108	DP=18;VDB=0.00992398;SGB=-0.556411;RPB=-;MQB=-;MQSB=1;BQB=-;MQ0F=0;ICB=-;HOB=-;AC=2;AN=2;DP4=0,0,2,2;MQ=20	GT:PL	1/1:73,12,0
Ref_Crab_Transcript_10750_304	141	A	G	46.2108	DP=18;VDB=0.00992398;SGB=-0.556411;RPB=-;MQB=-;MQSB=1;BQB=-;MQ0F=0;ICB=-;HOB=-;AC=2;AN=2;DP4=0,0,2,2;MQ=20	GT:PL	1/1:73,12,0
Ref_Crab_Transcript_10761_553	182	A	G	101	DP=29;VDB=0.993135;SGB=-0.691153;RPB=0.531893;MQB=1;MQSB=1;BQB=0.96429;MQ0F=0;ICB=1;HOB=0.5;AC=1;AN=2;DP4=5,6,7,11;MQ=20	GT:PL	0/1:134,0,86
Ref_Crab_Transcript_10800_689	632	G	T	96	DP=20;VDB=0.0120014;SGB=-0.688148;RPB=0.149382;MQB=1;MQSB=1;BQB=0.486752;MQ0F=0;ICB=1;HOB=0.5;AC=1;AN=2;DP4=3,1,6,9;MQ=20	GT:PL	0/1:130,0,17
Ref_Crab_Transcript_10800_689	647	C	G	72	DP=17;VDB=0.00641762;SGB=-0.670168;RPB=0.76338;MQB=1;MQSB=1;BQB=0.655816;MQ0F=0;ICB=1;HOB=0.5;AC=1;AN=2;DP4=3,2,5,5;MQ=20	GT:PL	0/1:105,0,46
Ref_Crab_Transcript_10800_689	658	C	T	58	DP=12;VDB=0.00194067;SGB=-0.651104;RPB=0.184981;MQB=1;MQSB=1;BQB=0.774755;MQ0F=0;ICB=1;HOB=0.5;AC=1;AN=2;DP4=3,0,5,3;MQ=20	GT:PL	0/1:91,0,20
Ref_Crab_Transcript_10800_689	659	C	T	44.0703	DP=12;VDB=0.00411761;SGB=-0.636426;RPB=0.643095;MQB=0.964642;MQSB=1;BQB=0.803868;MQ0F=0;ICB=1;HOB=0.5;AC=1;AN=2;DP4=3,1,5,2;MQ=20	GT:PL	0/1:77,0,39
Ref_Crab_Transcript_10810_729	670	G	C	35.4054	DP=12;VDB=0.302039;SGB=-0.616816;RPB=0.47436;MQB=0.982603;MQSB=1;BQB=0.931779;MQ0F=0;ICB=1;HOB=0.5;AC=1;AN=2;DP4=0,6,2,4;MQ=20	GT:PL	0/1:68,0,50
Ref_Crab_Transcript_10870_530	293	A	G	35.4053	DP=12;VDB=0.747124;SGB=-0.616816;RPB=0.931779;MQB=0.982603;MQSB=0.982603;BQB=0.47436;MQ0F=0;ICB=1;HOB=0.5;AC=1;AN=2;DP4=4,2,2,4;MQ=20	GT:PL	0/1:68,0,66
Ref_Crab_Transcript_10897_1319	137	C	T	70	DP=44;VDB=0.0507886;SGB=-0.692352;RPB=0.8473;MQB=1;MQSB=1;BQB=0.957784;MQ0F=0;ICB=1;HOB=0.5;AC=1;AN=2;DP4=22,1,16,5;MQ=20	GT:PL	0/1:103,0,69
Ref_Crab_Transcript_10913_2177	1857	A	C	31.6746	DP=34;VDB=0.372756;SGB=-0.670168;RPB=0.369955;MQB=1;MQSB=1;BQB=0.411907;MQ0F=0;ICB=1;HOB=0.5;AC=1;AN=2;DP4=16,7,4,6;MQ=20	GT:PL	0/1:65,0,125
Ref_Crab_Transcript_10914_1810	1188	C	T	52	DP=79;VDB=0.59527;SGB=-0.692831;RPB=0.75557;MQB=1;MQSB=1;BQB=0.11666;MQ0F=0;ICB=1;HOB=0.5;AC=1;AN=2;DP4=35,17,11,13;MQ=20	GT:PL	0/1:85,0,126
Ref_Crab_Transcript_10959_382	270	G	A	80	DP=34;VDB=0.466024;SGB=-0.690438;RPB=0.50373;MQB=1;MQSB=1;BQB=0.798072;MQ0F=0;ICB=1;HOB=0.5;AC=1;AN=2;DP4=6,11,5,12;MQ=20	GT:PL	0/1:113,0,121
Ref_Crab_Transcript_10968_402	218	G	A	68	DP=41;VDB=0.0365144;SGB=-0.690438;RPB=0.254683;MQB=1;MQSB=1;BQB=0.982989;MQ0F=0;ICB=1;HOB=0.5;AC=1;AN=2;DP4=23,1,11,6;MQ=20	GT:PL	0/1:101,0,70
Ref_Crab_Transcript_10968_402	279	C	G	78	DP=65;VDB=0.274289;SGB=-0.692976;RPB=0.533543;MQB=1;MQSB=1;BQB=0.722364;MQ0F=0;ICB=1;HOB=0.5;AC=1;AN=2;DP4=20,18,16,10;MQ=20	GT:PL	0/1:111,0,145
Ref_Crab_Transcript_10968_402	317	C	T	38.5709	DP=62;VDB=0.326003;SGB=-0.691153;RPB=0.963843;MQB=1;MQSB=1;BQB=0.304067;MQ0F=0;ICB=1;HOB=0.5;AC=1;AN=2;DP4=18,26,9,9;MQ=20	GT:PL	0/1:72,0,145
Ref_Crab_Transcript_11016_2204	1916	A	G	66	DP=93;VDB=0.000666319;SGB=-0.693139;RPB=0.0961738;MQB=1;MQSB=1;BQB=0.418426;MQ0F=0;ICB=1;HOB=0.5;AC=1;AN=2;DP4=33,23,25,11;MQ=20	GT:PL	0/1:99,0,139
Ref_Crab_Transcript_11022_839	292	C	T	40.3548	DP=79;VDB=0.46428;SGB=-0.693127;RPB=1.21222e-06;MQB=1;MQSB=1;BQB=0.609551;MQ0F=0;ICB=1;HOB=0.5;AC=1;AN=2;DP4=35,6,30,3;MQ=20	GT:PL	0/1:73,0,100
Ref_Crab_Transcript_11023_855	71	A	G	63	DP=357;VDB=3.2022e-38;SGB=-0.693147;RPB=3.83093e-25;MQB=1;MQSB=1;BQB=2.74428e-22;MQ0F=0;ICB=1;HOB=0.5;AC=1;AN=2;DP4=90,4,18,45;MQ=20	GT:PL	0/1:96,0,73
Ref_Crab_Transcript_11024_1089	1081	G	T	43.4075	DP=248;VDB=4.3301e-10;SGB=-0.690438;RPB=-;MQB=-;MQSB=-;BQB=-;MQ0F=0;ICB=-;HOB=-;AC=2;AN=2;DP4=0,0,17,0;MQ=20	GT:PL	1/1:70,51,0
Ref_Crab_Transcript_11101_1268	161	A	C	65	DP=135;VDB=0.527683;SGB=-0.693147;RPB=0.90598;MQB=1;MQSB=1;BQB=0.0268125;MQ0F=0;ICB=1;HOB=0.5;AC=1;AN=2;DP4=52,29,30,19;MQ=20	GT:PL	0/1:98,0,128
Ref_Crab_Transcript_11104_924	3	T	C	119	DP=29;VDB=2.38838e-11;SGB=-0.690438;RPB=1;MQB=1;MQSB=1;BQB=1;MQ0F=0;ICB=-;HOB=-;AC=2;AN=2;DP4=1,0,5,12;MQ=20	GT:PL	1/1:146,31,0
Ref_Crab_Transcript_11134_687	137	C	T	49.3359	DP=16;VDB=0.490055;SGB=-0.662043;RPB=0.97784;MQB=1;MQSB=1;BQB=0.198087;MQ0F=0;ICB=1;HOB=0.5;AC=1;AN=2;DP4=6,1,7,2;MQ=20	GT:PL	0/1:82,0,59
Ref_Crab_Transcript_11134_687	157	C	T	49.227	DP=25;VDB=0.397567;SGB=-0.670168;RPB=0.771052;MQB=1;MQSB=1;BQB=0.44315;MQ0F=0;ICB=1;HOB=0.5;AC=1;AN=2;DP4=14,1,6,4;MQ=20	GT:PL	0/1:82,0,77
Ref_Crab_Transcript_11141_712	374	C	T	87	DP=74;VDB=0.0622459;SGB=-0.69312;RPB=0.321533;MQB=1;MQSB=1;BQB=0.741925;MQ0F=0;ICB=1;HOB=0.5;AC=1;AN=2;DP4=23,18,19,13;MQ=20	GT:PL	0/1:120,0,141
Ref_Crab_Transcript_11164_426	156	C	T	59	DP=12;VDB=0.0663569;SGB=-0.651104;RPB=0.594978;MQB=1;MQSB=0.982603;BQB=0.968069;MQ0F=0;ICB=1;HOB=0.5;AC=1;AN=2;DP4=2,2,4,4;MQ=20	GT:PL	0/1:92,0,39
Ref_Crab_Transcript_11179_403	186	C	T	44.3857	DP=23;VDB=0.00320224;SGB=-0.670168;RPB=0.853271;MQB=1;MQSB=1;BQB=0.900548;MQ0F=0;ICB=1;HOB=0.5;AC=1;AN=2;DP4=3,8,2,8;MQ=20	GT:PL	0/1:77,0,97
Ref_Crab_Transcript_11213_903	191	C	T	79	DP=24;VDB=0.251288;SGB=-0.686358;RPB=0.591555;MQB=1;MQSB=1;BQB=0.202967;MQ0F=0;ICB=1;HOB=0.5;AC=1;AN=2;DP4=7,3,9,5;MQ=20	GT:PL	0/1:112,0,79
Ref_Crab_Transcript_11213_903	223	C	G	72	DP=35;VDB=0.407466;SGB=-0.688148;RPB=0.757263;MQB=1;MQSB=1;BQB=0.99985;MQ0F=0;ICB=1;HOB=0.5;AC=1;AN=2;DP4=15,4,9,6;MQ=20	GT:PL	0/1:105,0,104
Ref_Crab_Transcript_11213_903	306	C	G	53	DP=46;VDB=0.270422;SGB=-0.689466;RPB=0.917512;MQB=1;MQSB=1;BQB=0.573116;MQ0F=0;ICB=1;HOB=0.5;AC=1;AN=2;DP4=16,13,10,6;MQ=20	GT:PL	0/1:86,0,142
Ref_Crab_Transcript_11213_903	361	A	G	100	DP=104;VDB=0.300868;SGB=-0.693147;RPB=0.759844;MQB=1;MQSB=1;BQB=0.598577;MQ0F=0;ICB=1;HOB=0.5;AC=1;AN=2;DP4=25,17,39,21;MQ=20	GT:PL	0/1:133,0,115
Ref_Crab_Transcript_11253_1373	434	A	G	30.3542	DP=11;VDB=0.41821;SGB=-0.590765;RPB=0.89338;MQB=0.974597;MQSB=0.974597;BQB=0.89338;MQ0F=0;ICB=1;HOB=0.5;AC=1;AN=2;DP4=2,2,2,3;MQ=20	GT:PL	0/1:63,0,48
Ref_Crab_Transcript_11338_693	631	G	A	175	DP=25;VDB=0.00659148;SGB=-0.692914;RPB=-;MQB=-;MQSB=1;BQB=-;MQ0F=0;ICB=-;HOB=-;AC=2;AN=2;DP4=0,0,9,16;MQ=20	GT:PL	1/1:202,75,0
Ref_Crab_Transcript_11338_693	644	G	T	117	DP=15;VDB=0.00165356;SGB=-0.683931;RPB=1;MQB=1;MQSB=1;BQB=1;MQ0F=0;ICB=-;HOB=-;AC=2;AN=2;DP4=0,1,5,8;MQ=20	GT:PL	1/1:144,22,0
Ref_Crab_Transcript_11338_693	649	T	G	114	DP=14;VDB=0.000408428;SGB=-0.680642;RPB=-;MQB=-;MQSB=1;BQB=-;MQ0F=0;ICB=-;HOB=-;AC=2;AN=2;DP4=0,0,3,9;MQ=20	GT:PL	1/1:141,36,0
Ref_Crab_Transcript_11338_693	651	C	G	117	DP=14;VDB=0.000428428;SGB=-0.683931;RPB=-;MQB=-;MQSB=1;BQB=-;MQ0F=0;ICB=-;HOB=-;AC=2;AN=2;DP4=0,0,3,10;MQ=20	GT:PL	1/1:144,39,0
Ref_Crab_Transcript_11338_693	656	T	C	109	DP=12;VDB=0.000146104;SGB=-0.670168;RPB=-;MQB=-;MQSB=0.916482;BQB=-;MQ0F=0;ICB=-;HOB=-;AC=2;AN=2;DP4=0,0,3,7;MQ=20	GT:PL	1/1:136,30,0
Ref_Crab_Transcript_11338_693	659	A	G	109	DP=10;VDB=0.000146104;SGB=-0.670168;RPB=-;MQB=-;MQSB=0.916482;BQB=-;MQ0F=0;ICB=-;HOB=-;AC=2;AN=2;DP4=0,0,3,7;MQ=20	GT:PL	1/1:136,30,0
Ref_Crab_Transcript_11338_693	663	A	T	95	DP=10;VDB=0.000545198;SGB=-0.662043;RPB=-;MQB=-;MQSB=1;BQB=-;MQ0F=0;ICB=-;HOB=-;AC=2;AN=2;DP4=0,0,2,7;MQ=20	GT:PL	1/1:122,27,0
Ref_Crab_Transcript_11345_514	351	G	A	36.4051	DP=12;VDB=0.987954;SGB=-0.616816;RPB=0.864013;MQB=0.982603;MQSB=0.982603;BQB=0.71154;MQ0F=0;ICB=1;HOB=0.5;AC=1;AN=2;DP4=3,3,3,3;MQ=20	GT:PL	0/1:69,0,69
Ref_Crab_Transcript_11381_2087	213	T	A	31.2304	DP=10;VDB=0.82691;SGB=-0.616816;RPB=0.783809;MQB=1.00775;MQSB=0.916482;BQB=0.895781;MQ0F=0;ICB=1;HOB=0.5;AC=1;AN=2;DP4=2,2,5,1;MQ=20	GT:PL	0/1:64,0,45
Ref_Crab_Transcript_11530_671	560	A	G	45.755	DP=69;VDB=0.281035;SGB=-0.692352;RPB=0.41966;MQB=1;MQSB=1;BQB=0.152451;MQ0F=0;ICB=1;HOB=0.5;AC=1;AN=2;DP4=14,32,6,15;MQ=20	GT:PL	0/1:79,0,149
Ref_Crab_Transcript_11531_1162	502	T	C	47.2583	DP=23;VDB=0.00385174;SGB=-0.662043;RPB=0.544971;MQB=1;MQSB=1;BQB=0.834768;MQ0F=0;ICB=1;HOB=0.5;AC=1;AN=2;DP4=7,6,5,4;MQ=20	GT:PL	0/1:80,0,115
Ref_Crab_Transcript_11573_654	253	C	G	47.1745	DP=320;VDB=0.123262;SGB=-0.693147;RPB=0.574691;MQB=1;MQSB=1;BQB=0.969314;MQ0F=0;ICB=1;HOB=0.5;AC=1;AN=2;DP4=102,87,60,59;MQ=20	GT:PL	0/1:80,0,136
Ref_Crab_Transcript_11582_755	126	T	A	33.391	DP=16;VDB=0.80389;SGB=-0.616816;RPB=0.31698;MQB=0.961166;MQSB=0.961166;BQB=0.777113;MQ0F=0;ICB=1;HOB=0.5;AC=1;AN=2;DP4=4,3,3,3;MQ=20	GT:PL	0/1:66,0,75
Ref_Crab_Transcript_11586_1458	990	C	T	119	DP=112;VDB=0.917007;SGB=-0.693147;RPB=0.116557;MQB=1;MQSB=1;BQB=0.0156276;MQ0F=0;ICB=1;HOB=0.5;AC=1;AN=2;DP4=12,36,20,42;MQ=20	GT:PL	0/1:152,0,130
Ref_Crab_Transcript_11699_388	271	T	C	31.2699	DP=17;VDB=0.949127;SGB=-0.636426;RPB=0.943335;MQB=1;MQSB=1;BQB=0.252539;MQ0F=0;ICB=1;HOB=0.5;AC=1;AN=2;DP4=5,5,5,2;MQ=20	GT:PL	0/1:64,0,102
Ref_Crab_Transcript_11881_753	45	A	C	76	DP=42;VDB=4.92509e-05;SGB=-0.692562;RPB=0.195101;MQB=1;MQSB=1;BQB=0.960076;MQ0F=0;ICB=1;HOB=0.5;AC=1;AN=2;DP4=5,13,17,5;MQ=20	GT:PL	0/1:109,0,112
Ref_Crab_Transcript_11963_438	131	T	C	31.2308	DP=10;VDB=0.241952;SGB=-0.616816;RPB=0.727822;MQB=1.00775;MQSB=1;BQB=0.895781;MQ0F=0;ICB=1;HOB=0.5;AC=1;AN=2;DP4=3,1,5,1;MQ=20	GT:PL	0/1:64,0,42
Ref_Crab_Transcript_12159_723	335	A	G	35.4053	DP=12;VDB=0.861911;SGB=-0.616816;RPB=0.71154;MQB=0.982603;MQSB=0.982603;BQB=0.931779;MQ0F=0;ICB=1;HOB=0.5;AC=1;AN=2;DP4=4,2,2,4;MQ=20	GT:PL	0/1:68,0,66
Ref_Crab_Transcript_12159_723	431	G	C	46.3785	DP=13;VDB=0.966469;SGB=-0.636426;RPB=0.920266;MQB=0.961166;MQSB=0.961166;BQB=0.623736;MQ0F=0;ICB=1;HOB=0.5;AC=1;AN=2;DP4=3,3,3,4;MQ=20	GT:PL	0/1:79,0,66
Ref_Crab_Transcript_12169_395	194	A	G	53	DP=10;VDB=0.989881;SGB=-0.636426;RPB=0.916482;MQB=0.916482;MQSB=0.952347;BQB=0.733186;MQ0F=0;ICB=1;HOB=0.5;AC=1;AN=2;DP4=2,1,3,4;MQ=20	GT:PL	0/1:86,0,28
Ref_Crab_Transcript_12177_342	1	T	G	38.2178	DP=35;VDB=1.91941e-15;SGB=-0.692976;RPB=0.765648;MQB=1;MQSB=1;BQB=0.905086;MQ0F=0;ICB=1;HOB=0.5;AC=1;AN=2;DP4=1,7,22,4;MQ=20	GT:PL	0/1:74,3,49
Ref_Crab_Transcript_12177_342	2	T	C	45.3184	DP=60;VDB=1.97623e-15;SGB=-0.692831;RPB=0.363449;MQB=1;MQSB=1;BQB=0.19277;MQ0F=0;ICB=1;HOB=0.5;AC=1;AN=2;DP4=4,20,21,3;MQ=20	GT:PL	0/1:78,0,111
Ref_Crab_Transcript_12177_342	4	T	C	55	DP=89;VDB=2.18554e-11;SGB=-0.69168;RPB=0.972542;MQB=1;MQSB=1;BQB=0.755426;MQ0F=0;ICB=1;HOB=0.5;AC=1;AN=2;DP4=11,19,14,5;MQ=20	GT:PL	0/1:88,0,149
Ref_Crab_Transcript_12178_422	316	C	T	65	DP=32;VDB=0.0381783;SGB=-0.688148;RPB=0.823561;MQB=1;MQSB=1;BQB=0.492881;MQ0F=0;ICB=1;HOB=0.5;AC=1;AN=2;DP4=4,13,3,12;MQ=20	GT:PL	0/1:98,0,114
Ref_Crab_Transcript_12295_359	91	T	C	100	DP=168;VDB=0.797032;SGB=-0.693147;RPB=0.703367;MQB=1;MQSB=1;BQB=0.746352;MQ0F=0;ICB=1;HOB=0.5;AC=1;AN=2;DP4=42,46,36,38;MQ=20	GT:PL	0/1:133,0,147
Ref_Crab_Transcript_12384_909	795	T	A	43.7285	DP=52;VDB=0.832487;SGB=-0.690438;RPB=0.639192;MQB=1;MQSB=1;BQB=0.994261;MQ0F=0;ICB=1;HOB=0.5;AC=1;AN=2;DP4=11,24,8,9;MQ=20	GT:PL	0/1:77,0,146
Ref_Crab_Transcript_12402_325	236	A	G	95	DP=23;VDB=0.152765;SGB=-0.688148;RPB=0.0365184;MQB=1;MQSB=1;BQB=0.780011;MQ0F=0;ICB=1;HOB=0.5;AC=1;AN=2;DP4=2,5,7,8;MQ=20	GT:PL	0/1:128,0,54
Ref_Crab_Transcript_12402_325	254	A	G	31.0957	DP=19;VDB=0.909978;SGB=-0.636426;RPB=0.968368;MQB=1;MQSB=1;BQB=0.356243;MQ0F=0;ICB=1;HOB=0.5;AC=1;AN=2;DP4=5,7,3,4;MQ=20	GT:PL	0/1:64,0,114
Ref_Crab_Transcript_12404_401	55	T	A	95	DP=29;VDB=0.000768577;SGB=-0.691153;RPB=0.785318;MQB=1;MQSB=1;BQB=0.858978;MQ0F=0;ICB=1;HOB=0.5;AC=1;AN=2;DP4=5,5,11,7;MQ=20	GT:PL	0/1:128,0,77
Ref_Crab_Transcript_12431_1414	184	T	A	60	DP=88;VDB=2.4262e-07;SGB=-0.693143;RPB=0.879485;MQB=1;MQSB=1;BQB=0.966672;MQ0F=0;ICB=1;HOB=0.5;AC=1;AN=2;DP4=34,10,32,6;MQ=20	GT:PL	0/1:93,0,116
Ref_Crab_Transcript_12432_1340	100	A	G	73	DP=17;VDB=0.000681569;SGB=-0.670168;RPB=0.79189;MQB=0.79189;MQSB=0.995381;BQB=0.0573643;MQ0F=0;ICB=1;HOB=0.5;AC=1;AN=2;DP4=5,2,3,7;MQ=23	GT:PL	0/1:106,0,100
Ref_Crab_Transcript_12520_408	121	T	A	48.4043	DP=17;VDB=0.188618;SGB=-0.651104;RPB=0.978183;MQB=1;MQSB=1;BQB=0.978183;MQ0F=0;ICB=1;HOB=0.5;AC=1;AN=2;DP4=6,2,5,3;MQ=20	GT:PL	0/1:81,0,75
Ref_Crab_Transcript_12550_664	572	T	G	95	DP=40;VDB=2.17536e-09;SGB=-0.692352;RPB=0.0189303;MQB=0.999175;MQSB=0.820377;BQB=0.999633;MQ0F=0;ICB=1;HOB=0.5;AC=1;AN=2;DP4=6,13,11,10;MQ=20	GT:PL	0/1:128,0,119
Ref_Crab_Transcript_12550_664	600	T	G	107	DP=33;VDB=3.7214e-10;SGB=-0.692914;RPB=0.472641;MQB=0.96203;MQSB=0.82403;BQB=0.97553;MQ0F=0;ICB=-;HOB=-;AC=2;AN=2;DP4=2,3,13,12;MQ=20	GT:PL	1/1:137,0,4
Ref_Crab_Transcript_12550_664	603	A	G	95	DP=31;VDB=3.72517e-08;SGB=-0.690438;RPB=0.55113;MQB=0.999213;MQSB=0.818731;BQB=0.774721;MQ0F=0;ICB=1;HOB=0.5;AC=1;AN=2;DP4=6,8,9,8;MQ=20	GT:PL	0/1:128,0,103
Ref_Crab_Transcript_12550_664	628	T	G	148	DP=30;VDB=6.21263e-10;SGB=-0.692976;RPB=0.326923;MQB=0.5;MQSB=0.942064;BQB=1;MQ0F=0;ICB=-;HOB=-;AC=2;AN=2;DP4=1,1,12,14;MQ=20	GT:PL	1/1:175,42,0
Ref_Crab_Transcript_12550_664	631	A	G	94	DP=30;VDB=3.51113e-07;SGB=-0.691153;RPB=0.979753;MQB=0.921439;MQSB=0.947838;BQB=0.0929206;MQ0F=0;ICB=1;HOB=0.5;AC=1;AN=2;DP4=3,8,11,7;MQ=20	GT:PL	0/1:127,0,79
Ref_Crab_Transcript_12560_304	62	T	A	36.6722	DP=11;VDB=0.0181343;SGB=-0.636426;RPB=0.733186;MQB=0.916482;MQSB=1;BQB=0.916482;MQ0F=0;ICB=1;HOB=0.5;AC=1;AN=2;DP4=2,1,6,1;MQ=20	GT:PL	0/1:70,0,28
Ref_Crab_Transcript_12608_654	140	T	A	57	DP=13;VDB=0.424295;SGB=-0.651104;RPB=0.723173;MQB=1;MQSB=0.961166;BQB=0.591555;MQ0F=0;ICB=1;HOB=0.5;AC=1;AN=2;DP4=3,2,4,4;MQ=20	GT:PL	0/1:90,0,51
Ref_Crab_Transcript_12689_463	345	T	G	30.3559	DP=10;VDB=0.114666;SGB=-0.590765;RPB=0.89338;MQB=0.974597;MQSB=1;BQB=0.649731;MQ0F=0;ICB=1;HOB=0.5;AC=1;AN=2;DP4=0,4,2,3;MQ=20	GT:PL	0/1:63,0,38
Ref_Crab_Transcript_12827_1336	164	T	C	35.0706	DP=86;VDB=0.967112;SGB=-0.69311;RPB=0.7321;MQB=1;MQSB=1;BQB=0.925833;MQ0F=0;ICB=1;HOB=0.5;AC=1;AN=2;DP4=43,11,26,5;MQ=20	GT:PL	0/1:68,0,112
Ref_Crab_Transcript_12827_1336	622	C	T	112	DP=145;VDB=0.486905;SGB=-0.693147;RPB=0.56149;MQB=1;MQSB=1;BQB=0.0888548;MQ0F=0;ICB=1;HOB=0.5;AC=1;AN=2;DP4=34,35,30,42;MQ=20	GT:PL	0/1:145,0,138
Ref_Crab_Transcript_12839_410	400	G	A	54	DP=28;VDB=5.49563e-08;SGB=-0.688148;RPB=1;MQB=1;MQSB=1;BQB=1;MQ0F=0;ICB=-;HOB=-;AC=2;AN=2;DP4=1,0,0,15;MQ=20	GT:PL	1/1:81,28,0
Ref_Crab_Transcript_12882_912	218	G	A	34.0966	DP=22;VDB=0.78101;SGB=-0.651104;RPB=0.532578;MQB=1;MQSB=1;BQB=0.0205064;MQ0F=0;ICB=1;HOB=0.5;AC=1;AN=2;DP4=6,7,4,4;MQ=20	GT:PL	0/1:67,0,118
Ref_Crab_Transcript_12929_1768	603	C	T	47.1034	DP=11;VDB=0.6902;SGB=-0.636426;RPB=0.964642;MQB=0.964642;MQSB=0.964642;BQB=0.361741;MQ0F=0;ICB=1;HOB=0.5;AC=1;AN=2;DP4=1,3,3,4;MQ=20	GT:PL	0/1:80,0,40
Ref_Crab_Transcript_12940_410	209	C	G	72	DP=41;VDB=0.0407111;SGB=-0.690438;RPB=0.881262;MQB=1;MQSB=1;BQB=0.729697;MQ0F=0;ICB=1;HOB=0.5;AC=1;AN=2;DP4=4,20,6,11;MQ=20	GT:PL	0/1:105,0,118
Ref_Crab_Transcript_13019_522	148	C	A	50	DP=11;VDB=0.0505719;SGB=-0.636426;RPB=0.361741;MQB=0.964642;MQSB=0.964642;BQB=0.964642;MQ0F=0;ICB=1;HOB=0.5;AC=1;AN=2;DP4=1,3,3,4;MQ=20	GT:PL	0/1:83,0,40
Ref_Crab_Transcript_13021_528	115	T	C	52	DP=13;VDB=0.0377075;SGB=-0.651104;RPB=0.876998;MQB=0.50373;MQSB=0.961166;BQB=0.997325;MQ0F=0;ICB=1;HOB=0.5;AC=1;AN=2;DP4=4,1,3,5;MQ=21	GT:PL	0/1:85,0,52
Ref_Crab_Transcript_13021_528	132	C	T	66	DP=15;VDB=0.067912;SGB=-0.662043;RPB=0.984496;MQB=0.431591;MQSB=0.845852;BQB=0.745722;MQ0F=0;ICB=1;HOB=0.5;AC=1;AN=2;DP4=4,2,3,6;MQ=22	GT:PL	0/1:99,0,91
Ref_Crab_Transcript_13037_678	325	G	A	33.2319	DP=13;VDB=0.625428;SGB=-0.616816;RPB=0.279932;MQB=1.00775;MQSB=0.952347;BQB=0.0559863;MQ0F=0;ICB=1;HOB=0.5;AC=1;AN=2;DP4=4,0,1,5;MQ=20	GT:PL	0/1:66,0,36
Ref_Crab_Transcript_13235_736	661	C	A	46.9562	DP=11;VDB=0.0096619;SGB=-0.636426;RPB=0.442128;MQB=0.964642;MQSB=1;BQB=0.0401934;MQ0F=0;ICB=1;HOB=0.5;AC=1;AN=2;DP4=1,3,2,5;MQ=20	GT:PL	0/1:80,0,35
Ref_Crab_Transcript_13241_493	149	T	C	38.3687	DP=11;VDB=0.210772;SGB=-0.616816;RPB=0.891517;MQB=0.950952;MQSB=0.950952;BQB=0.683497;MQ0F=0;ICB=1;HOB=0.5;AC=1;AN=2;DP4=3,2,3,3;MQ=20	GT:PL	0/1:71,0,57
Ref_Crab_Transcript_13304_300	208	C	G	31.4059	DP=12;VDB=0.888498;SGB=-0.616816;RPB=0.660716;MQB=0.982603;MQSB=1;BQB=0.813189;MQ0F=0;ICB=1;HOB=0.5;AC=1;AN=2;DP4=1,5,3,3;MQ=20	GT:PL	0/1:64,0,60
Ref_Crab_Transcript_13379_409	142	A	G	38.2203	DP=11;VDB=0.434785;SGB=-0.616816;RPB=0.895781;MQB=1.00775;MQSB=1;BQB=0.895781;MQ0F=0;ICB=1;HOB=0.5;AC=1;AN=2;DP4=4,0,4,2;MQ=20	GT:PL	0/1:71,0,35
Ref_Crab_Transcript_13379_409	164	G	A	47.2821	DP=12;VDB=0.166446;SGB=-0.636426;RPB=0.896474;MQB=0.95494;MQSB=1;BQB=0.760054;MQ0F=0;ICB=1;HOB=0.5;AC=1;AN=2;DP4=4,1,4,3;MQ=20	GT:PL	0/1:80,0,49
Ref_Crab_Transcript_13386_968	164	A	G	107	DP=10;VDB=0.882136;SGB=-0.670168;RPB=-;MQB=-;MQSB=1.00775;BQB=-;MQ0F=0;ICB=-;HOB=-;AC=2;AN=2;DP4=0,0,6,4;MQ=20	GT:PL	1/1:134,30,0
Ref_Crab_Transcript_13440_1104	638	G	T	68	DP=171;VDB=1;SGB=-0.693147;RPB=0.84207;MQB=1;MQSB=1;BQB=0.659132;MQ0F=0;ICB=1;HOB=0.5;AC=1;AN=2;DP4=17,29,59,64;MQ=20	GT:PL	0/1:102,0,28
Ref_Crab_Transcript_13445_318	119	T	C	52	DP=15;VDB=0.0168362;SGB=-0.651104;RPB=0.511891;MQB=1;MQSB=1;BQB=0.993326;MQ0F=0;ICB=1;HOB=0.5;AC=1;AN=2;DP4=4,3,3,5;MQ=20	GT:PL	0/1:85,0,73
Ref_Crab_Transcript_13445_318	128	T	C	54	DP=14;VDB=0.0168362;SGB=-0.651104;RPB=0.740818;MQB=1;MQSB=1;BQB=0.902954;MQ0F=0;ICB=1;HOB=0.5;AC=1;AN=2;DP4=3,3,3,5;MQ=20	GT:PL	0/1:87,0,64
Ref_Crab_Transcript_13445_318	129	G	A	54	DP=14;VDB=0.0168362;SGB=-0.651104;RPB=0.740818;MQB=1;MQSB=1;BQB=0.586646;MQ0F=0;ICB=1;HOB=0.5;AC=1;AN=2;DP4=3,3,3,5;MQ=20	GT:PL	0/1:87,0,64
Ref_Crab_Transcript_13457_340	224	C	A	55	DP=26;VDB=0.00737407;SGB=-0.676189;RPB=0.662021;MQB=1;MQSB=1;BQB=0.0543603;MQ0F=0;ICB=1;HOB=0.5;AC=1;AN=2;DP4=10,5,7,4;MQ=20	GT:PL	0/1:88,0,113
Ref_Crab_Transcript_13457_340	245	A	T	71	DP=33;VDB=0.874256;SGB=-0.683931;RPB=0.214711;MQB=1;MQSB=1;BQB=0.0416237;MQ0F=0;ICB=1;HOB=0.5;AC=1;AN=2;DP4=9,7,6,7;MQ=20	GT:PL	0/1:104,0,122
Ref_Crab_Transcript_13457_340	323	G	A	87	DP=10;VDB=0.000196491;SGB=-0.662043;RPB=-;MQB=-;MQSB=1;BQB=-;MQ0F=0;ICB=-;HOB=-;AC=2;AN=2;DP4=0,0,1,8;MQ=20	GT:PL	1/1:114,27,0
Ref_Crab_Transcript_13508_808	724	G	T	53	DP=49;VDB=0.0108834;SGB=-0.69168;RPB=0.934064;MQB=1;MQSB=1;BQB=0.998107;MQ0F=0;ICB=1;HOB=0.5;AC=1;AN=2;DP4=5,25,3,16;MQ=20	GT:PL	0/1:86,0,127
Ref_Crab_Transcript_13535_1530	90	G	T	82	DP=91;VDB=0.976723;SGB=-0.693147;RPB=0.355791;MQB=1;MQSB=1;BQB=0.387404;MQ0F=0;ICB=1;HOB=0.5;AC=1;AN=2;DP4=21,6,43,16;MQ=20	GT:PL	0/1:115,0,58
Ref_Crab_Transcript_13568_869	609	T	C	36.3899	DP=17;VDB=0.169891;SGB=-0.651104;RPB=0.934676;MQB=1;MQSB=1;BQB=0.313653;MQ0F=0;ICB=1;HOB=0.5;AC=1;AN=2;DP4=3,5,3,5;MQ=20	GT:PL	0/1:69,0,83
Ref_Crab_Transcript_13599_486	391	G	C	38.2283	DP=10;VDB=0.5;SGB=-0.616816;RPB=0.559863;MQB=1.00775;MQSB=0.916482;BQB=0.895781;MQ0F=0;ICB=1;HOB=0.5;AC=1;AN=2;DP4=3,1,4,2;MQ=20	GT:PL	0/1:71,0,42
Ref_Crab_Transcript_13702_651	497	T	C	42.9282	DP=10;VDB=0.215799;SGB=-0.616816;RPB=0.231146;MQB=0.924584;MQSB=0.924584;BQB=0.809011;MQ0F=0;ICB=1;HOB=0.5;AC=1;AN=2;DP4=0,3,3,3;MQ=20	GT:PL	0/1:76,0,26
Ref_Crab_Transcript_13716_300	252	A	T	33.2068	DP=11;VDB=0.0459681;SGB=-0.616816;RPB=0.895781;MQB=1.00775;MQSB=0.916482;BQB=0.279932;MQ0F=0;ICB=1;HOB=0.5;AC=1;AN=2;DP4=2,2,1,5;MQ=20	GT:PL	0/1:66,0,43
Ref_Crab_Transcript_13744_467	175	C	A	72	DP=21;VDB=0.470998;SGB=-0.680642;RPB=0.604728;MQB=1;MQSB=1;BQB=0.881841;MQ0F=0;ICB=1;HOB=0.5;AC=1;AN=2;DP4=7,1,8,4;MQ=20	GT:PL	0/1:105,0,58
Ref_Crab_Transcript_13744_467	214	A	C	66	DP=27;VDB=0.153225;SGB=-0.680642;RPB=0.988166;MQB=1;MQSB=1;BQB=0.887472;MQ0F=0;ICB=1;HOB=0.5;AC=1;AN=2;DP4=9,5,6,6;MQ=20	GT:PL	0/1:99,0,110
Ref_Crab_Transcript_13747_487	138	C	T	46.9218	DP=119;VDB=0.406074;SGB=-0.693144;RPB=0.727573;MQB=1;MQSB=1;BQB=0.956472;MQ0F=0;ICB=1;HOB=0.5;AC=1;AN=2;DP4=47,29,25,14;MQ=20	GT:PL	0/1:80,0,126
Ref_Crab_Transcript_13797_3284	2131	G	A	30.8225	DP=435;VDB=0.867196;SGB=-0.693147;RPB=0.964394;MQB=1;MQSB=1;BQB=0.999997;MQ0F=0;ICB=1;HOB=0.5;AC=1;AN=2;DP4=145,147,67,72;MQ=20	GT:PL	0/1:64,0,127
Ref_Crab_Transcript_13810_357	186	A	T	45.3786	DP=13;VDB=0.96311;SGB=-0.636426;RPB=0.920266;MQB=0.961166;MQSB=1;BQB=0.0511259;MQ0F=0;ICB=1;HOB=0.5;AC=1;AN=2;DP4=1,5,4,3;MQ=20	GT:PL	0/1:78,0,59
Ref_Crab_Transcript_13815_311	82	C	G	40.3788	DP=14;VDB=0.0260456;SGB=-0.636426;RPB=0.828239;MQB=0.961166;MQSB=1;BQB=0.623736;MQ0F=0;ICB=1;HOB=0.5;AC=1;AN=2;DP4=5,1,5,2;MQ=20	GT:PL	0/1:73,0,57
Ref_Crab_Transcript_13815_311	95	G	A	52	DP=17;VDB=0.414654;SGB=-0.662043;RPB=0.869318;MQB=1;MQSB=1;BQB=1;MQ0F=0;ICB=1;HOB=0.5;AC=1;AN=2;DP4=5,3,5,4;MQ=20	GT:PL	0/1:85,0,79
Ref_Crab_Transcript_13815_311	130	G	A	41.4045	DP=14;VDB=0.960104;SGB=-0.636426;RPB=0.948864;MQB=0.966012;MQSB=1;BQB=0.428703;MQ0F=0;ICB=1;HOB=0.5;AC=1;AN=2;DP4=3,4,2,5;MQ=20	GT:PL	0/1:74,0,77
Ref_Crab_Transcript_13842_506	280	G	A	42.9041	DP=10;VDB=0.824688;SGB=-0.616816;RPB=0.346719;MQB=0.924584;MQSB=0.974597;BQB=0.809011;MQ0F=0;ICB=1;HOB=0.5;AC=1;AN=2;DP4=1,2,3,3;MQ=20	GT:PL	0/1:76,0,31
Ref_Crab_Transcript_13904_764	190	C	T	45.366	DP=13;VDB=0.766482;SGB=-0.636426;RPB=0.695312;MQB=0.961166;MQSB=1;BQB=0.961166;MQ0F=0;ICB=1;HOB=0.5;AC=1;AN=2;DP4=4,2,4,3;MQ=20	GT:PL	0/1:78,0,60
Ref_Crab_Transcript_13928_926	593	G	C	120	DP=134;VDB=0.950303;SGB=-0.693147;RPB=0.451477;MQB=1;MQSB=1;BQB=0.954585;MQ0F=0;ICB=1;HOB=0.5;AC=1;AN=2;DP4=14,46,23,48;MQ=20	GT:PL	0/1:153,0,139
Ref_Crab_Transcript_13969_364	226	T	C	57	DP=10;VDB=0.224313;SGB=-0.651104;RPB=1;MQB=1;MQSB=1;BQB=1;MQ0F=0;ICB=-;HOB=-;AC=2;AN=2;DP4=1,0,1,7;MQ=20	GT:PL	1/1:84,7,0
Ref_Crab_Transcript_13974_406	2	T	A	65	DP=40;VDB=3.27321e-13;SGB=-0.692067;RPB=0.820745;MQB=1;MQSB=1;BQB=0.940317;MQ0F=0;ICB=1;HOB=0.5;AC=1;AN=2;DP4=13,5,10,10;MQ=20	GT:PL	0/1:98,0,104
Ref_Crab_Transcript_13974_406	3	T	C	61	DP=41;VDB=3.27321e-13;SGB=-0.692067;RPB=0.711532;MQB=1;MQSB=1;BQB=0.386128;MQ0F=0;ICB=1;HOB=0.5;AC=1;AN=2;DP4=13,7,11,9;MQ=20	GT:PL	0/1:94,0,117
Ref_Crab_Transcript_13974_406	25	G	A	68	DP=87;VDB=4.03125e-08;SGB=-0.693079;RPB=4.68381e-05;MQB=1;MQSB=1;BQB=0.000280024;MQ0F=0;ICB=1;HOB=0.5;AC=1;AN=2;DP4=35,19,11,18;MQ=20	GT:PL	0/1:101,0,131
Ref_Crab_Transcript_13974_406	55	A	G	111	DP=137;VDB=5.58035e-10;SGB=-0.693147;RPB=5.52083e-09;MQB=1;MQSB=1;BQB=0.2978;MQ0F=0;ICB=1;HOB=0.5;AC=1;AN=2;DP4=42,24,26,40;MQ=20	GT:PL	0/1:144,0,131
Ref_Crab_Transcript_13974_406	58	G	T	111	DP=140;VDB=2.6621e-08;SGB=-0.693147;RPB=1.44383e-08;MQB=1;MQSB=1;BQB=0.192969;MQ0F=0;ICB=1;HOB=0.5;AC=1;AN=2;DP4=41,21,29,40;MQ=20	GT:PL	0/1:144,0,125
Ref_Crab_Transcript_13974_406	66	G	A	114	DP=147;VDB=2.06788e-06;SGB=-0.693147;RPB=1.2516e-10;MQB=1;MQSB=1;BQB=0.0708885;MQ0F=0;ICB=1;HOB=0.5;AC=1;AN=2;DP4=42,25,33,42;MQ=20	GT:PL	0/1:147,0,127
Ref_Crab_Transcript_14007_616	465	A	G	45.282	DP=12;VDB=0.391417;SGB=-0.636426;RPB=0.331306;MQB=0.95494;MQSB=1;BQB=0.838008;MQ0F=0;ICB=1;HOB=0.5;AC=1;AN=2;DP4=2,3,2,5;MQ=20	GT:PL	0/1:78,0,55
Ref_Crab_Transcript_14120_852	261	C	T	51	DP=10;VDB=0.682525;SGB=-0.636426;RPB=0.733186;MQB=0.916482;MQSB=0.952347;BQB=0.733186;MQ0F=0;ICB=1;HOB=0.5;AC=1;AN=2;DP4=1,2,4,3;MQ=20	GT:PL	0/1:84,0,28
Ref_Crab_Transcript_14302_791	596	T	C	49.0695	DP=12;VDB=0.825506;SGB=-0.636426;RPB=0.964642;MQB=0.964642;MQSB=0.950952;BQB=0.924449;MQ0F=0;ICB=1;HOB=0.5;AC=1;AN=2;DP4=2,2,4,3;MQ=20	GT:PL	0/1:82,0,42
Ref_Crab_Transcript_14339_549	203	C	T	79	DP=72;VDB=0.0402296;SGB=-0.693079;RPB=0.254136;MQB=1;MQSB=1;BQB=0.97432;MQ0F=0;ICB=1;HOB=0.5;AC=1;AN=2;DP4=26,16,18,11;MQ=20	GT:PL	0/1:112,0,137
Ref_Crab_Transcript_14386_1093	580	T	C	45.4043	DP=17;VDB=0.299782;SGB=-0.651104;RPB=0.544441;MQB=1;MQSB=1;BQB=0.792156;MQ0F=0;ICB=1;HOB=0.5;AC=1;AN=2;DP4=4,4,2,6;MQ=20	GT:PL	0/1:78,0,84
Ref_Crab_Transcript_14436_1512	1114	A	G	30.406	DP=13;VDB=0.448427;SGB=-0.616816;RPB=0.660716;MQB=0.982603;MQSB=1;BQB=0.931779;MQ0F=0;ICB=1;HOB=0.5;AC=1;AN=2;DP4=4,2,4,2;MQ=20	GT:PL	0/1:63,0,66
Ref_Crab_Transcript_14488_446	193	T	A	37.3689	DP=11;VDB=0.031576;SGB=-0.616816;RPB=0.0297172;MQB=0.950952;MQSB=0.950952;BQB=0.891517;MQ0F=0;ICB=1;HOB=0.5;AC=1;AN=2;DP4=4,1,2,4;MQ=20	GT:PL	0/1:70,0,52
Ref_Crab_Transcript_14522_357	83	C	T	41.2303	DP=10;VDB=0.551573;SGB=-0.616816;RPB=0.727822;MQB=1.00775;MQSB=0.916482;BQB=0.727822;MQ0F=0;ICB=1;HOB=0.5;AC=1;AN=2;DP4=4,0,3,3;MQ=20	GT:PL	0/1:74,0,36
Ref_Crab_Transcript_14620_816	498	T	C	58	DP=175;VDB=0.996273;SGB=-0.693147;RPB=0.0193281;MQB=1;MQSB=1;BQB=0.169063;MQ0F=0;ICB=1;HOB=0.5;AC=1;AN=2;DP4=54,58,24,38;MQ=20	GT:PL	0/1:91,0,136
Ref_Crab_Transcript_14676_304	186	A	G	57	DP=16;VDB=0.588772;SGB=-0.662043;RPB=0.933674;MQB=1;MQSB=1;BQB=0.667136;MQ0F=0;ICB=1;HOB=0.5;AC=1;AN=2;DP4=4,3,4,5;MQ=20	GT:PL	0/1:90,0,69
Ref_Crab_Transcript_14695_1334	383	C	T	57	DP=13;VDB=0.999115;SGB=-0.651104;RPB=1;MQB=1;MQSB=1;BQB=0.0209031;MQ0F=0;ICB=1;HOB=0.5;AC=1;AN=2;DP4=4,1,4,4;MQ=20	GT:PL	0/1:90,0,47
Ref_Crab_Transcript_14819_404	125	A	C	48.385	DP=15;VDB=0.0504289;SGB=-0.651104;RPB=0.785785;MQB=1;MQSB=1;BQB=0.993326;MQ0F=0;ICB=1;HOB=0.5;AC=1;AN=2;DP4=0,7,2,6;MQ=20	GT:PL	0/1:81,0,52
Ref_Crab_Transcript_14937_329	25	C	G	107	DP=12;VDB=0.00024733;SGB=-0.670168;RPB=-;MQB=-;MQSB=1.00775;BQB=-;MQ0F=0;ICB=-;HOB=-;AC=2;AN=2;DP4=0,0,6,4;MQ=20	GT:PL	1/1:134,30,0
Ref_Crab_Transcript_14937_329	26	C	T	107	DP=12;VDB=0.00024733;SGB=-0.670168;RPB=-;MQB=-;MQSB=1.00775;BQB=-;MQ0F=0;ICB=-;HOB=-;AC=2;AN=2;DP4=0,0,6,4;MQ=20	GT:PL	1/1:134,30,0
Ref_Crab_Transcript_14937_329	28	C	T	107	DP=12;VDB=0.00024733;SGB=-0.670168;RPB=-;MQB=-;MQSB=1.00775;BQB=-;MQ0F=0;ICB=-;HOB=-;AC=2;AN=2;DP4=0,0,6,4;MQ=20	GT:PL	1/1:134,30,0
Ref_Crab_Transcript_14991_2004	476	T	G	97	DP=3985;VDB=0.750507;SGB=-0.693147;RPB=0.0070629;MQB=1;MQSB=1;BQB=0.0725924;MQ0F=0;ICB=1;HOB=0.5;AC=1;AN=2;DP4=1258,846,1151,611;MQ=20	GT:PL	0/1:130,0,147
Ref_Crab_Transcript_14993_1055	894	G	A	51	DP=30;VDB=0.0603829;SGB=-0.680642;RPB=0.551509;MQB=1;MQSB=1;BQB=0.523708;MQ0F=0;ICB=1;HOB=0.5;AC=1;AN=2;DP4=3,13,3,9;MQ=20	GT:PL	0/1:84,0,108
Ref_Crab_Transcript_15089_886	165	C	T	38.2279	DP=10;VDB=0.28128;SGB=-0.616816;RPB=1.00775;MQB=1.00775;MQSB=1.00775;BQB=0.167959;MQ0F=0;ICB=1;HOB=0.5;AC=1;AN=2;DP4=2,2,4,2;MQ=20	GT:PL	0/1:71,0,45
Ref_Crab_Transcript_15089_886	195	T	C	61	DP=13;VDB=0.230053;SGB=-0.662043;RPB=0.826565;MQB=1;MQSB=1;BQB=0.988166;MQ0F=0;ICB=1;HOB=0.5;AC=1;AN=2;DP4=2,2,6,3;MQ=20	GT:PL	0/1:94,0,37
Ref_Crab_Transcript_15089_886	200	C	G	40.3788	DP=13;VDB=0.427859;SGB=-0.636426;RPB=0.245404;MQB=0.961166;MQSB=1;BQB=0.920266;MQ0F=0;ICB=1;HOB=0.5;AC=1;AN=2;DP4=3,3,5,2;MQ=20	GT:PL	0/1:73,0,66
Ref_Crab_Transcript_15089_886	207	C	G	61	DP=13;VDB=0.230053;SGB=-0.662043;RPB=0.133734;MQB=1;MQSB=1;BQB=0.864302;MQ0F=0;ICB=1;HOB=0.5;AC=1;AN=2;DP4=2,2,6,3;MQ=20	GT:PL	0/1:94,0,37
Ref_Crab_Transcript_15118_512	60	C	T	36.0761	DP=11;VDB=0.159342;SGB=-0.636426;RPB=0.562708;MQB=0.964642;MQSB=1;BQB=0.200967;MQ0F=0;ICB=1;HOB=0.5;AC=1;AN=2;DP4=4,0,6,1;MQ=20	GT:PL	0/1:69,0,33
Ref_Crab_Transcript_15153_396	247	C	T	37.7239	DP=43;VDB=0.460588;SGB=-0.683931;RPB=0.976591;MQB=1;MQSB=1;BQB=0.892839;MQ0F=0;ICB=1;HOB=0.5;AC=1;AN=2;DP4=9,20,4,9;MQ=20	GT:PL	0/1:71,0,147
Ref_Crab_Transcript_15153_396	297	T	A	65	DP=27;VDB=0.716595;SGB=-0.651104;RPB=1;MQB=1;MQSB=1;BQB=1;MQ0F=0;ICB=-;HOB=-;AC=2;AN=2;DP4=0,1,1,7;MQ=20	GT:PL	1/1:92,12,0
Ref_Crab_Transcript_15159_497	357	C	A	113	DP=60;VDB=0.0840147;SGB=-0.693136;RPB=0.983943;MQB=1;MQSB=1;BQB=0.804423;MQ0F=0;ICB=1;HOB=0.5;AC=1;AN=2;DP4=7,18,10,25;MQ=20	GT:PL	0/1:146,0,116
Ref_Crab_Transcript_15188_586	244	G	A	60	DP=16;VDB=0.774083;SGB=-0.662043;RPB=0.95083;MQB=1;MQSB=1;BQB=0.817356;MQ0F=0;ICB=1;HOB=0.5;AC=1;AN=2;DP4=4,3,5,4;MQ=20	GT:PL	0/1:93,0,68
Ref_Crab_Transcript_15250_907	331	A	G	44.1407	DP=26;VDB=0.0199125;SGB=-0.670168;RPB=0.99446;MQB=1;MQSB=1;BQB=0.99446;MQ0F=0;ICB=1;HOB=0.5;AC=1;AN=2;DP4=3,13,6,4;MQ=20	GT:PL	0/1:77,0,110
Ref_Crab_Transcript_15255_775	117	G	A	39.2672	DP=22;VDB=0.437652;SGB=-0.662043;RPB=1;MQB=1;MQSB=1;BQB=0.588055;MQ0F=0;ICB=1;HOB=0.5;AC=1;AN=2;DP4=7,5,6,3;MQ=20	GT:PL	0/1:72,0,108
Ref_Crab_Transcript_15297_925	754	T	C	48.6714	DP=10;VDB=0.643019;SGB=-0.636426;RPB=0.916482;MQB=0.916482;MQSB=1.00775;BQB=0.274945;MQ0F=0;ICB=1;HOB=0.5;AC=1;AN=2;DP4=2,1,2,5;MQ=20	GT:PL	0/1:82,0,28
Ref_Crab_Transcript_15370_2043	14	T	G	46.0861	DP=11;VDB=0.00671048;SGB=-0.556411;RPB=-;MQB=-;MQSB=1;BQB=-;MQ0F=0;ICB=-;HOB=-;AC=2;AN=2;DP4=0,0,2,2;MQ=20	GT:PL	1/1:73,12,0
Ref_Crab_Transcript_15370_2043	15	G	A	46.1538	DP=14;VDB=0.00671048;SGB=-0.556411;RPB=-;MQB=-;MQSB=1;BQB=-;MQ0F=0;ICB=-;HOB=-;AC=2;AN=2;DP4=0,0,2,2;MQ=20	GT:PL	1/1:73,12,0
Ref_Crab_Transcript_15370_2043	16	T	G	46.1538	DP=14;VDB=0.00671048;SGB=-0.556411;RPB=-;MQB=-;MQSB=1;BQB=-;MQ0F=0;ICB=-;HOB=-;AC=2;AN=2;DP4=0,0,2,2;MQ=20	GT:PL	1/1:73,12,0
Ref_Crab_Transcript_15396_1561	1456	C	T	60	DP=35;VDB=0.0250631;SGB=-0.683931;RPB=0.85466;MQB=1;MQSB=1;BQB=0.998199;MQ0F=0;ICB=1;HOB=0.5;AC=1;AN=2;DP4=5,13,4,9;MQ=20	GT:PL	0/1:93,0,124
Ref_Crab_Transcript_15421_344	146	T	C	37.9149	DP=10;VDB=0.234846;SGB=-0.636426;RPB=0.916482;MQB=0.916482;MQSB=0.916482;BQB=0.274945;MQ0F=0;ICB=1;HOB=0.5;AC=1;AN=2;DP4=1,2,2,5;MQ=20	GT:PL	0/1:71,0,29
Ref_Crab_Transcript_15444_314	3	G	A	57	DP=23;VDB=2.87225e-11;SGB=-0.689466;RPB=0.104346;MQB=1;MQSB=1;BQB=0.443252;MQ0F=0;ICB=1;HOB=0.5;AC=1;AN=2;DP4=2,2,10,6;MQ=20	GT:PL	0/1:91,0,24
Ref_Crab_Transcript_15707_913	385	A	T	110	DP=247;VDB=0.998015;SGB=-0.693147;RPB=0.34156;MQB=1;MQSB=1;BQB=0.0458215;MQ0F=0;ICB=1;HOB=0.5;AC=1;AN=2;DP4=57,64,51,61;MQ=20	GT:PL	0/1:143,0,152
Ref_Crab_Transcript_15763_953	720	G	A	54	DP=12;VDB=0.538025;SGB=-0.651104;RPB=0.746718;MQB=1;MQSB=1;BQB=0.98568;MQ0F=0;ICB=1;HOB=0.5;AC=1;AN=2;DP4=2,2,2,6;MQ=20	GT:PL	0/1:87,0,39
Ref_Crab_Transcript_15780_419	98	T	G	32.3808	DP=13;VDB=0.572009;SGB=-0.616816;RPB=0.920266;MQB=0.961166;MQSB=1;BQB=0.899815;MQ0F=0;ICB=1;HOB=0.5;AC=1;AN=2;DP4=2,5,2,4;MQ=20	GT:PL	0/1:65,0,76
Ref_Crab_Transcript_15832_617	321	G	T	50	DP=11;VDB=0.399755;SGB=-0.636426;RPB=0.924449;MQB=0.964642;MQSB=0.950952;BQB=0.0401934;MQ0F=0;ICB=1;HOB=0.5;AC=1;AN=2;DP4=2,2,3,4;MQ=20	GT:PL	0/1:83,0,42
Ref_Crab_Transcript_15855_1809	392	T	C	31.4329	DP=89;VDB=0.912922;SGB=-0.689466;RPB=0.616875;MQB=1;MQSB=1;BQB=0.506958;MQ0F=0;ICB=1;HOB=0.5;AC=1;AN=2;DP4=23,19,7,9;MQ=20	GT:PL	0/1:65,0,138
Ref_Crab_Transcript_15855_1809	656	A	G	34.7149	DP=132;VDB=0.975054;SGB=-0.693145;RPB=0.827485;MQB=1;MQSB=1;BQB=0.949993;MQ0F=0;ICB=1;HOB=0.5;AC=1;AN=2;DP4=45,45,19,21;MQ=20	GT:PL	0/1:68,0,125
Ref_Crab_Transcript_15867_393	196	G	C	50	DP=20;VDB=0.320998;SGB=-0.662043;RPB=0.0732898;MQB=1;MQSB=1;BQB=0.76338;MQ0F=0;ICB=1;HOB=0.5;AC=1;AN=2;DP4=6,4,6,3;MQ=20	GT:PL	0/1:83,0,95
Ref_Crab_Transcript_15908_465	223	C	T	73	DP=394;VDB=0.814372;SGB=-0.693147;RPB=0.434474;MQB=1;MQSB=1;BQB=0.557814;MQ0F=0;ICB=1;HOB=0.5;AC=1;AN=2;DP4=110,125,77,76;MQ=20	GT:PL	0/1:106,0,151
Ref_Crab_Transcript_15911_485	159	A	G	50	DP=11;VDB=0.168254;SGB=-0.636426;RPB=0.763675;MQB=0.964642;MQSB=0.950952;BQB=0.924449;MQ0F=0;ICB=1;HOB=0.5;AC=1;AN=2;DP4=2,2,3,4;MQ=20	GT:PL	0/1:83,0,42
Ref_Crab_Transcript_15975_347	126	C	T	91	DP=11;VDB=0.955501;SGB=-0.670168;RPB=1;MQB=1;MQSB=0.950952;BQB=1;MQ0F=0;ICB=-;HOB=-;AC=2;AN=2;DP4=0,1,6,4;MQ=20	GT:PL	1/1:118,13,0
Ref_Crab_Transcript_16035_311	87	G	A	68	DP=12;VDB=0.176359;SGB=-0.662043;RPB=0.962269;MQB=1;MQSB=0.95494;BQB=0.25042;MQ0F=0;ICB=1;HOB=0.5;AC=1;AN=2;DP4=1,2,4,5;MQ=20	GT:PL	0/1:102,0,22
Ref_Crab_Transcript_16061_454	231	C	T	46.1021	DP=28;VDB=0.491369;SGB=-0.670168;RPB=0.794751;MQB=1;MQSB=1;BQB=0.931552;MQ0F=0;ICB=1;HOB=0.5;AC=1;AN=2;DP4=7,10,4,6;MQ=20	GT:PL	0/1:79,0,132
Ref_Crab_Transcript_16061_454	256	T	C	33.8943	DP=31;VDB=0.2421;SGB=-0.662043;RPB=0.527181;MQB=1;MQSB=1;BQB=0.163516;MQ0F=0;ICB=1;HOB=0.5;AC=1;AN=2;DP4=7,11,3,6;MQ=20	GT:PL	0/1:67,0,136
Ref_Crab_Transcript_16082_346	77	G	T	36.4051	DP=12;VDB=0.906964;SGB=-0.616816;RPB=0.982603;MQB=0.982603;MQSB=1;BQB=0.931779;MQ0F=0;ICB=1;HOB=0.5;AC=1;AN=2;DP4=1,5,3,3;MQ=20	GT:PL	0/1:69,0,62
Ref_Crab_Transcript_16089_464	383	A	T	183	DP=28;VDB=0.00035392;SGB=-0.693021;RPB=-;MQB=-;MQSB=0.927416;BQB=-;MQ0F=0;ICB=-;HOB=-;AC=2;AN=2;DP4=0,0,13,14;MQ=21	GT:PL	1/1:210,81,0
Ref_Crab_Transcript_16110_547	326	T	A	51	DP=26;VDB=0.543076;SGB=-0.670168;RPB=0.937067;MQB=1;MQSB=1;BQB=0.367738;MQ0F=0;ICB=1;HOB=0.5;AC=1;AN=2;DP4=8,7,5,5;MQ=20	GT:PL	0/1:84,0,122
Ref_Crab_Transcript_16264_476	107	G	A	41.3188	DP=19;VDB=0.263557;SGB=-0.651104;RPB=0.0833066;MQB=1;MQSB=1;BQB=0.996597;MQ0F=0;ICB=1;HOB=0.5;AC=1;AN=2;DP4=7,4,5,3;MQ=20	GT:PL	0/1:74,0,98
Ref_Crab_Transcript_16330_1695	3	A	T	56	DP=42;VDB=8.49811e-07;SGB=-0.670168;RPB=0.566419;MQB=1;MQSB=1;BQB=0.938795;MQ0F=0;ICB=1;HOB=0.5;AC=1;AN=2;DP4=3,5,2,8;MQ=20	GT:PL	0/1:89,0,78
Ref_Crab_Transcript_16398_300	103	G	A	32.9841	DP=23;VDB=0.387294;SGB=-0.651104;RPB=0.875173;MQB=1;MQSB=1;BQB=0.567118;MQ0F=0;ICB=1;HOB=0.5;AC=1;AN=2;DP4=7,8,3,5;MQ=20	GT:PL	0/1:66,0,127
Ref_Crab_Transcript_16401_1269	110	G	T	35.3572	DP=28;VDB=0.39866;SGB=-0.683931;RPB=0.774988;MQB=1;MQSB=1;BQB=0.409709;MQ0F=0;ICB=1;HOB=0.5;AC=1;AN=2;DP4=11,4,12,1;MQ=20	GT:PL	0/1:68,0,103
Ref_Crab_Transcript_16401_1269	124	G	C	44.1667	DP=40;VDB=0.213899;SGB=-0.688148;RPB=0.997399;MQB=1;MQSB=1;BQB=0.422062;MQ0F=0;ICB=1;HOB=0.5;AC=1;AN=2;DP4=19,5,12,3;MQ=20	GT:PL	0/1:77,0,110
Ref_Crab_Transcript_16453_1357	1123	A	T	74	DP=60;VDB=0.543918;SGB=-0.692831;RPB=0.915489;MQB=1;MQSB=1;BQB=0.997359;MQ0F=0;ICB=1;HOB=0.5;AC=1;AN=2;DP4=14,19,5,19;MQ=20	GT:PL	0/1:107,0,149
Ref_Crab_Transcript_16472_920	547	A	G	59	DP=12;VDB=0.992538;SGB=-0.651104;RPB=0.996401;MQB=1;MQSB=0.95494;BQB=0.94394;MQ0F=0;ICB=1;HOB=0.5;AC=1;AN=2;DP4=3,1,4,4;MQ=20	GT:PL	0/1:92,0,37
Ref_Crab_Transcript_16540_349	254	C	G	85	DP=10;VDB=0.441507;SGB=-0.662043;RPB=1;MQB=1;MQSB=1.00775;BQB=1;MQ0F=0;ICB=-;HOB=-;AC=2;AN=2;DP4=1,0,3,6;MQ=20	GT:PL	1/1:112,10,0
Ref_Crab_Transcript_16561_436	294	G	A	47.282	DP=12;VDB=0.250641;SGB=-0.636426;RPB=0.838008;MQB=0.95494;MQSB=0.95494;BQB=0.838008;MQ0F=0;ICB=1;HOB=0.5;AC=1;AN=2;DP4=3,2,4,3;MQ=20	GT:PL	0/1:80,0,54
Ref_Crab_Transcript_16581_377	227	C	T	35.8274	DP=36;VDB=0.000631523;SGB=-0.676189;RPB=0.047755;MQB=1;MQSB=1;BQB=0.110641;MQ0F=0;ICB=1;HOB=0.5;AC=1;AN=2;DP4=7,16,3,8;MQ=20	GT:PL	0/1:69,0,140
Ref_Crab_Transcript_16610_1292	488	A	G	51	DP=10;VDB=0.946823;SGB=-0.636426;RPB=0.857143;MQB=1;MQSB=0.924584;BQB=0.785714;MQ0F=0;ICB=1;HOB=0.5;AC=1;AN=2;DP4=1,1,2,5;MQ=20	GT:PL	0/1:84,0,13
Ref_Crab_Transcript_16639_615	269	G	A	38.1513	DP=21;VDB=0.476212;SGB=-0.651104;RPB=0.909914;MQB=1;MQSB=1;BQB=0.936543;MQ0F=0;ICB=1;HOB=0.5;AC=1;AN=2;DP4=4,9,4,4;MQ=20	GT:PL	0/1:71,0,114
Ref_Crab_Transcript_16646_744	314	T	C	30.3415	DP=11;VDB=0.176043;SGB=-0.590765;RPB=0.974597;MQB=0.974597;MQSB=0.974597;BQB=0.162433;MQ0F=0;ICB=1;HOB=0.5;AC=1;AN=2;DP4=2,2,2,3;MQ=20	GT:PL	0/1:63,0,46
Ref_Crab_Transcript_16647_1171	180	C	T	31.3864	DP=12;VDB=0.551573;SGB=-0.616816;RPB=0.564628;MQB=0.950952;MQSB=1;BQB=0.475476;MQ0F=0;ICB=1;HOB=0.5;AC=1;AN=2;DP4=5,0,4,2;MQ=20	GT:PL	0/1:64,0,44
Ref_Crab_Transcript_16658_626	406	T	C	45.7237	DP=10;VDB=0.422204;SGB=-0.636426;RPB=0.274945;MQB=0.916482;MQSB=1;BQB=0.916482;MQ0F=0;ICB=1;HOB=0.5;AC=1;AN=2;DP4=3,0,5,2;MQ=20	GT:PL	0/1:79,0,23
Ref_Crab_Transcript_16682_320	99	G	A	31.0957	DP=19;VDB=0.391417;SGB=-0.636426;RPB=0.944459;MQB=1;MQSB=1;BQB=0.496585;MQ0F=0;ICB=1;HOB=0.5;AC=1;AN=2;DP4=9,3,3,4;MQ=20	GT:PL	0/1:64,0,98
Ref_Crab_Transcript_16690_829	507	C	A	38.3364	DP=16;VDB=0.983294;SGB=-0.636426;RPB=0.987474;MQB=1;MQSB=1;BQB=1;MQ0F=0;ICB=1;HOB=0.5;AC=1;AN=2;DP4=4,5,4,3;MQ=20	GT:PL	0/1:71,0,94
Ref_Crab_Transcript_16690_829	512	C	A	38.3423	DP=16;VDB=0.983294;SGB=-0.636426;RPB=0.987474;MQB=1;MQSB=1;BQB=0.817356;MQ0F=0;ICB=1;HOB=0.5;AC=1;AN=2;DP4=4,5,4,3;MQ=20	GT:PL	0/1:71,0,92
Ref_Crab_Transcript_16740_877	706	A	G	43.385	DP=14;VDB=0.672169;SGB=-0.636426;RPB=0.899815;MQB=0.961166;MQSB=0.961166;BQB=0.899815;MQ0F=0;ICB=1;HOB=0.5;AC=1;AN=2;DP4=3,3,3,4;MQ=20	GT:PL	0/1:76,0,65
Ref_Crab_Transcript_16746_703	642	C	T	61	DP=15;VDB=0.106182;SGB=-0.662043;RPB=0.840624;MQB=1;MQSB=1;BQB=0.499352;MQ0F=0;ICB=1;HOB=0.5;AC=1;AN=2;DP4=2,4,3,6;MQ=20	GT:PL	0/1:94,0,60
Ref_Crab_Transcript_16777_362	247	C	T	46.2631	DP=10;VDB=0.15523;SGB=-0.651104;RPB=0.25;MQB=1;MQSB=1;BQB=0.9375;MQ0F=0;ICB=1;HOB=0.5;AC=1;AN=2;DP4=1,1,1,7;MQ=20	GT:PL	0/1:79,0,10
Ref_Crab_Transcript_16785_420	59	A	G	31.6536	DP=136;VDB=0.419815;SGB=-0.693144;RPB=0.742177;MQB=1;MQSB=1;BQB=0.899695;MQ0F=0;ICB=1;HOB=0.5;AC=1;AN=2;DP4=22,69,14,25;MQ=20	GT:PL	0/1:65,0,138
Ref_Crab_Transcript_16884_1251	431	C	G	55	DP=23;VDB=0.515549;SGB=-0.676189;RPB=0.104951;MQB=1;MQSB=1;BQB=0.671527;MQ0F=0;ICB=1;HOB=0.5;AC=1;AN=2;DP4=6,6,8,3;MQ=20	GT:PL	0/1:88,0,107
Ref_Crab_Transcript_16934_520	370	C	T	85	DP=24;VDB=0.0871592;SGB=-0.686358;RPB=0.993166;MQB=1;MQSB=1;BQB=0.403791;MQ0F=0;ICB=1;HOB=0.5;AC=1;AN=2;DP4=5,5,5,9;MQ=20	GT:PL	0/1:118,0,87
Ref_Crab_Transcript_16946_578	117	C	T	37.8217	DP=68;VDB=0.339736;SGB=-0.692562;RPB=0.506305;MQB=1;MQSB=1;BQB=0.510181;MQ0F=0;ICB=1;HOB=0.5;AC=1;AN=2;DP4=37,9,16,6;MQ=20	GT:PL	0/1:71,0,107
Ref_Crab_Transcript_16993_352	328	A	G	61	DP=14;VDB=0.000651479;SGB=-0.670168;RPB=0.105399;MQB=1;MQSB=1;BQB=0.655406;MQ0F=0;ICB=1;HOB=0.5;AC=1;AN=2;DP4=3,1,2,8;MQ=20	GT:PL	0/1:94,0,31
Ref_Crab_Transcript_17093_702	134	T	G	48.3857	DP=21;VDB=0.456924;SGB=-0.670168;RPB=0.335079;MQB=1;MQSB=1;BQB=0.951033;MQ0F=0;ICB=1;HOB=0.5;AC=1;AN=2;DP4=8,3,7,3;MQ=20	GT:PL	0/1:81,0,91
Ref_Crab_Transcript_17094_687	418	G	A	33.406	DP=12;VDB=0.631962;SGB=-0.616816;RPB=0.931779;MQB=0.982603;MQSB=0.982603;BQB=0.931779;MQ0F=0;ICB=1;HOB=0.5;AC=1;AN=2;DP4=2,4,4,2;MQ=20	GT:PL	0/1:66,0,68
Ref_Crab_Transcript_17114_309	69	C	A	49.0575	DP=17;VDB=0.0704613;SGB=-0.676189;RPB=0.922371;MQB=0.902783;MQSB=-;BQB=0.85832;MQ0F=0;ICB=1;HOB=0.5;AC=1;AN=2;DP4=6,0,11,0;MQ=22	GT:PL	0/1:82,0,56
Ref_Crab_Transcript_17131_629	212	T	C	38.3687	DP=11;VDB=0.0303686;SGB=-0.616816;RPB=0.208021;MQB=0.950952;MQSB=0.950952;BQB=0.683497;MQ0F=0;ICB=1;HOB=0.5;AC=1;AN=2;DP4=3,2,3,3;MQ=20	GT:PL	0/1:71,0,57
Ref_Crab_Transcript_17203_383	288	C	T	42.2685	DP=10;VDB=0.0347691;SGB=-0.616816;RPB=1;MQB=1;MQSB=1;BQB=1;MQ0F=0;ICB=-;HOB=-;AC=2;AN=2;DP4=0,1,5,1;MQ=20	GT:PL	1/1:69,1,0
Ref_Crab_Transcript_17224_352	162	A	G	58	DP=10;VDB=0.171405;SGB=-0.651104;RPB=0.4375;MQB=1;MQSB=1.00775;BQB=0.375;MQ0F=0;ICB=1;HOB=0.5;AC=1;AN=2;DP4=2,0,2,6;MQ=20	GT:PL	0/1:90,0,8
Ref_Crab_Transcript_17262_419	221	C	T	70	DP=13;VDB=0.918911;SGB=-0.670168;RPB=0.944459;MQB=1;MQSB=1;BQB=0.748798;MQ0F=0;ICB=1;HOB=0.5;AC=1;AN=2;DP4=1,2,3,7;MQ=20	GT:PL	0/1:104,0,19
Ref_Crab_Transcript_17282_530	270	T	C	61	DP=19;VDB=0.00567744;SGB=-0.670168;RPB=0.199222;MQB=1;MQSB=1;BQB=0.360295;MQ0F=0;ICB=1;HOB=0.5;AC=1;AN=2;DP4=7,2,3,7;MQ=20	GT:PL	0/1:94,0,76
Ref_Crab_Transcript_17301_1407	997	A	G	63	DP=116;VDB=0.396781;SGB=-0.693144;RPB=0.874052;MQB=1;MQSB=1;BQB=0.621098;MQ0F=0;ICB=1;HOB=0.5;AC=1;AN=2;DP4=43,29,20,19;MQ=20	GT:PL	0/1:96,0,132
Ref_Crab_Transcript_17359_1123	339	T	C	91	DP=107;VDB=0.873629;SGB=-0.693146;RPB=0.685028;MQB=1;MQSB=1;BQB=0.974782;MQ0F=0;ICB=1;HOB=0.5;AC=1;AN=2;DP4=31,26,25,19;MQ=20	GT:PL	0/1:124,0,141
Ref_Crab_Transcript_17365_365	166	T	C	30.3822	DP=13;VDB=0.936955;SGB=-0.616816;RPB=0.961166;MQB=0.961166;MQSB=1;BQB=0.0511259;MQ0F=0;ICB=1;HOB=0.5;AC=1;AN=2;DP4=4,3,4,2;MQ=20	GT:PL	0/1:63,0,78
Ref_Crab_Transcript_17365_365	167	T	C	30.3822	DP=13;VDB=0.936955;SGB=-0.616816;RPB=0.961166;MQB=0.961166;MQSB=1;BQB=0.0306755;MQ0F=0;ICB=1;HOB=0.5;AC=1;AN=2;DP4=4,3,4,2;MQ=20	GT:PL	0/1:63,0,78
Ref_Crab_Transcript_17372_711	195	C	T	45.7237	DP=11;VDB=0.0872424;SGB=-0.636426;RPB=0.916482;MQB=0.916482;MQSB=1;BQB=0.183296;MQ0F=0;ICB=1;HOB=0.5;AC=1;AN=2;DP4=3,0,5,2;MQ=20	GT:PL	0/1:79,0,23
Ref_Crab_Transcript_17443_332	142	C	T	51	DP=10;VDB=0.447761;SGB=-0.636426;RPB=0.641538;MQB=0.916482;MQSB=1.00775;BQB=0.366593;MQ0F=0;ICB=1;HOB=0.5;AC=1;AN=2;DP4=2,1,4,3;MQ=20	GT:PL	0/1:84,0,28
Ref_Crab_Transcript_17457_385	142	C	T	51	DP=10;VDB=0.556801;SGB=-0.636426;RPB=0.641538;MQB=0.916482;MQSB=0.952347;BQB=0.916482;MQ0F=0;ICB=1;HOB=0.5;AC=1;AN=2;DP4=1,2,4,3;MQ=20	GT:PL	0/1:84,0,28
Ref_Crab_Transcript_17466_361	230	T	C	32.3879	DP=11;VDB=0.724522;SGB=-0.616816;RPB=0.950952;MQB=0.950952;MQSB=0.950952;BQB=0.950952;MQ0F=0;ICB=1;HOB=0.5;AC=1;AN=2;DP4=3,2,2,4;MQ=20	GT:PL	0/1:65,0,57
Ref_Crab_Transcript_17574_622	242	C	T	95	DP=20;VDB=0.637244;SGB=-0.688148;RPB=0.252729;MQB=1;MQSB=1;BQB=0.938795;MQ0F=0;ICB=-;HOB=-;AC=2;AN=2;DP4=3,0,9,6;MQ=20	GT:PL	1/1:122,0,1
Ref_Crab_Transcript_17684_434	297	C	T	41.2276	DP=10;VDB=0.00915276;SGB=-0.616816;RPB=0.895781;MQB=1.00775;MQSB=0.952347;BQB=0.167959;MQ0F=0;ICB=1;HOB=0.5;AC=1;AN=2;DP4=2,2,3,3;MQ=20	GT:PL	0/1:74,0,45
Ref_Crab_Transcript_17752_853	37	T	C	47.282	DP=12;VDB=0.0302289;SGB=-0.636426;RPB=0.760054;MQB=0.95494;MQSB=0.95494;BQB=0.6821;MQ0F=0;ICB=1;HOB=0.5;AC=1;AN=2;DP4=3,2,4,3;MQ=20	GT:PL	0/1:80,0,54
Ref_Crab_Transcript_17752_853	81	A	G	47.2578	DP=27;VDB=0.0128723;SGB=-0.676189;RPB=0.885367;MQB=1;MQSB=1;BQB=0.863017;MQ0F=0;ICB=1;HOB=0.5;AC=1;AN=2;DP4=10,6,8,3;MQ=20	GT:PL	0/1:80,0,118
Ref_Crab_Transcript_17758_335	197	A	T	53	DP=10;VDB=0.827357;SGB=-0.636426;RPB=0.366593;MQB=0.916482;MQSB=1.00775;BQB=0.916482;MQ0F=0;ICB=1;HOB=0.5;AC=1;AN=2;DP4=1,2,3,4;MQ=20	GT:PL	0/1:86,0,28
Ref_Crab_Transcript_17781_558	446	C	A	44.8686	DP=95;VDB=0.940215;SGB=-0.693097;RPB=0.933331;MQB=1;MQSB=1;BQB=0.00494238;MQ0F=0;ICB=1;HOB=0.5;AC=1;AN=2;DP4=37,24,20,10;MQ=20	GT:PL	0/1:78,0,131
Ref_Crab_Transcript_17859_466	324	C	T	54	DP=11;VDB=0.0946644;SGB=-0.651104;RPB=0.263597;MQB=1;MQSB=1;BQB=0.152558;MQ0F=0;ICB=1;HOB=0.5;AC=1;AN=2;DP4=1,2,2,6;MQ=20	GT:PL	0/1:88,0,25
Ref_Crab_Transcript_17861_490	191	G	A	103	DP=91;VDB=0.130967;SGB=-0.693146;RPB=0.414642;MQB=1;MQSB=1;BQB=0.653647;MQ0F=0;ICB=1;HOB=0.5;AC=1;AN=2;DP4=22,22,24,20;MQ=20	GT:PL	0/1:136,0,139
Ref_Crab_Transcript_17908_602	423	T	C	57	DP=13;VDB=0.929713;SGB=-0.651104;RPB=0.958048;MQB=1;MQSB=1;BQB=0.908075;MQ0F=0;ICB=1;HOB=0.5;AC=1;AN=2;DP4=0,5,4,4;MQ=20	GT:PL	0/1:90,0,39
Ref_Crab_Transcript_18021_661	209	T	A	53	DP=10;VDB=0.17561;SGB=-0.636426;RPB=0.641538;MQB=0.916482;MQSB=1.00775;BQB=0.916482;MQ0F=0;ICB=1;HOB=0.5;AC=1;AN=2;DP4=1,2,3,4;MQ=20	GT:PL	0/1:86,0,28
Ref_Crab_Transcript_18203_808	383	G	A	50	DP=16;VDB=0.749902;SGB=-0.651104;RPB=0.898397;MQB=1;MQSB=1;BQB=0.959011;MQ0F=0;ICB=1;HOB=0.5;AC=1;AN=2;DP4=4,3,5,3;MQ=20	GT:PL	0/1:83,0,73
Ref_Crab_Transcript_18211_335	295	A	G	149	DP=16;VDB=0.00035155;SGB=-0.689466;RPB=-;MQB=-;MQSB=1;BQB=-;MQ0F=0;ICB=-;HOB=-;AC=2;AN=2;DP4=0,0,7,9;MQ=20	GT:PL	1/1:176,48,0
Ref_Crab_Transcript_18211_335	298	A	T	130	DP=16;VDB=0.00471463;SGB=-0.683931;RPB=-;MQB=-;MQSB=1;BQB=-;MQ0F=0;ICB=-;HOB=-;AC=2;AN=2;DP4=0,0,5,8;MQ=20	GT:PL	1/1:157,39,0
Ref_Crab_Transcript_18211_335	312	T	A	126	DP=12;VDB=0.000157264;SGB=-0.680642;RPB=-;MQB=-;MQSB=0.982603;BQB=-;MQ0F=0;ICB=-;HOB=-;AC=2;AN=2;DP4=0,0,6,6;MQ=20	GT:PL	1/1:153,36,0
Ref_Crab_Transcript_18238_1843	1376	T	C	126	DP=356;VDB=0.245667;SGB=-0.693147;RPB=0.823958;MQB=1;MQSB=1;BQB=0.999672;MQ0F=0;ICB=1;HOB=0.5;AC=1;AN=2;DP4=62,78,75,132;MQ=20	GT:PL	0/1:159,0,116
Ref_Crab_Transcript_18243_850	442	T	C	83	DP=7947;VDB=0.109593;SGB=-0.693147;RPB=0.00315238;MQB=1;MQSB=1;BQB=0.0875951;MQ0F=0;ICB=1;HOB=0.5;AC=1;AN=2;DP4=2835,1685,2103,1165;MQ=20	GT:PL	0/1:116,0,149
Ref_Crab_Transcript_18272_521	296	C	A	32.1315	DP=10;VDB=0.870455;SGB=-0.590765;RPB=0.450401;MQB=0.900802;MQSB=0.900802;BQB=0.900802;MQ0F=0;ICB=1;HOB=0.5;AC=1;AN=2;DP4=1,2,2,3;MQ=20	GT:PL	0/1:65,0,34
Ref_Crab_Transcript_18272_521	425	T	C	70	DP=13;VDB=0.918911;SGB=-0.670168;RPB=0.968368;MQB=1;MQSB=0.961166;BQB=0.699673;MQ0F=0;ICB=1;HOB=0.5;AC=1;AN=2;DP4=0,3,6,4;MQ=20	GT:PL	0/1:104,0,15
Ref_Crab_Transcript_18318_1679	1395	G	A	120	DP=2090;VDB=0.0950214;SGB=-0.693147;RPB=0.628089;MQB=1;MQSB=1;BQB=0.73035;MQ0F=0;ICB=1;HOB=0.5;AC=1;AN=2;DP4=336,539,454,726;MQ=20	GT:PL	0/1:153,0,105
Ref_Crab_Transcript_18482_1849	611	G	C	72	DP=177;VDB=0.464862;SGB=-0.693147;RPB=0.964314;MQB=1;MQSB=1;BQB=0.509444;MQ0F=0;ICB=1;HOB=0.5;AC=1;AN=2;DP4=68,32,46,25;MQ=20	GT:PL	0/1:105,0,131
Ref_Crab_Transcript_18484_524	67	T	C	58	DP=22;VDB=0.0313847;SGB=-0.670168;RPB=0.408591;MQB=1;MQSB=1;BQB=0.990132;MQ0F=0;ICB=1;HOB=0.5;AC=1;AN=2;DP4=5,6,6,4;MQ=20	GT:PL	0/1:91,0,103
Ref_Crab_Transcript_18484_524	72	G	T	51	DP=22;VDB=0.0444992;SGB=-0.670168;RPB=0.447846;MQB=1;MQSB=1;BQB=0.428034;MQ0F=0;ICB=1;HOB=0.5;AC=1;AN=2;DP4=5,6,7,3;MQ=20	GT:PL	0/1:84,0,103
Ref_Crab_Transcript_18657_647	313	G	A	70	DP=21;VDB=0.399491;SGB=-0.680642;RPB=0.111069;MQB=1;MQSB=1;BQB=0.311207;MQ0F=0;ICB=1;HOB=0.5;AC=1;AN=2;DP4=6,3,8,4;MQ=20	GT:PL	0/1:103,0,78
Ref_Crab_Transcript_18830_395	232	T	C	37.3721	DP=11;VDB=0.883497;SGB=-0.616816;RPB=0.8618;MQB=0.950952;MQSB=0.950952;BQB=0.208021;MQ0F=0;ICB=1;HOB=0.5;AC=1;AN=2;DP4=2,3,3,3;MQ=20	GT:PL	0/1:70,0,57
Ref_Crab_Transcript_18836_685	2	T	A	48.967	DP=32;VDB=3.3753e-15;SGB=-0.692562;RPB=0.644112;MQB=1;MQSB=1;BQB=0.853544;MQ0F=0;ICB=1;HOB=0.5;AC=1;AN=2;DP4=7,1,18,4;MQ=20	GT:PL	0/1:82,0,43
Ref_Crab_Transcript_18836_685	3	T	C	35.1808	DP=32;VDB=3.48182e-15;SGB=-0.692352;RPB=0.997698;MQB=1;MQSB=1;BQB=0.781897;MQ0F=0;ICB=1;HOB=0.5;AC=1;AN=2;DP4=7,2,18,3;MQ=20	GT:PL	0/1:68,0,58
Ref_Crab_Transcript_18881_446	298	G	A	45.1276	DP=11;VDB=0.00102666;SGB=-0.636426;RPB=0.0803868;MQB=0.964642;MQSB=0.950952;BQB=0.924449;MQ0F=0;ICB=1;HOB=0.5;AC=1;AN=2;DP4=2,2,3,4;MQ=20	GT:PL	0/1:78,0,42
Ref_Crab_Transcript_18881_446	299	A	C	50	DP=11;VDB=0.00102666;SGB=-0.636426;RPB=0.0803868;MQB=0.964642;MQSB=0.950952;BQB=0.241161;MQ0F=0;ICB=1;HOB=0.5;AC=1;AN=2;DP4=2,2,3,4;MQ=20	GT:PL	0/1:83,0,42
Ref_Crab_Transcript_18950_897	378	C	T	30.0984	DP=7992;VDB=0.138704;SGB=-0.693147;RPB=0.59068;MQB=1;MQSB=1;BQB=3.47211e-05;MQ0F=0;ICB=1;HOB=0.5;AC=1;AN=2;DP4=2261,2737,1252,1650;MQ=20	GT:PL	0/1:63,0,128
Ref_Crab_Transcript_19037_402	79	A	G	41.8216	DP=10;VDB=0.469001;SGB=-0.616816;RPB=0.833333;MQB=1;MQSB=1;BQB=0.833333;MQ0F=0;ICB=1;HOB=0.5;AC=1;AN=2;DP4=2,0,4,2;MQ=20	GT:PL	0/1:75,0,14
Ref_Crab_Transcript_19211_616	252	T	C	70	DP=16;VDB=0.134903;SGB=-0.670168;RPB=0.836992;MQB=1;MQSB=1;BQB=0.930476;MQ0F=0;ICB=1;HOB=0.5;AC=1;AN=2;DP4=5,1,4,6;MQ=20	GT:PL	0/1:103,0,50
Ref_Crab_Transcript_19230_443	259	G	A	32.24	DP=27;VDB=0.132302;SGB=-0.676189;RPB=0.425278;MQB=1;MQSB=1;BQB=0.94986;MQ0F=0;ICB=1;HOB=0.5;AC=1;AN=2;DP4=4,12,1,10;MQ=20	GT:PL	0/1:65,0,118
Ref_Crab_Transcript_19476_725	219	G	A	30.5603	DP=38;VDB=0.509155;SGB=-0.676189;RPB=0.409783;MQB=1;MQSB=1;BQB=0.28831;MQ0F=0;ICB=1;HOB=0.5;AC=1;AN=2;DP4=14,13,5,6;MQ=20	GT:PL	0/1:64,0,145
Ref_Crab_Transcript_19495_488	212	T	C	55	DP=14;VDB=0.630851;SGB=-0.651104;RPB=0.902954;MQB=1;MQSB=1;BQB=0.927743;MQ0F=0;ICB=1;HOB=0.5;AC=1;AN=2;DP4=2,4,4,4;MQ=20	GT:PL	0/1:88,0,62
Ref_Crab_Transcript_19498_306	256	A	T	78	DP=11;VDB=0.00520153;SGB=-0.662043;RPB=1;MQB=1;MQSB=1;BQB=1;MQ0F=0;ICB=-;HOB=-;AC=2;AN=2;DP4=0,1,2,7;MQ=20	GT:PL	1/1:105,10,0
Ref_Crab_Transcript_19498_306	257	G	C	78	DP=11;VDB=0.00520153;SGB=-0.662043;RPB=1;MQB=1;MQSB=1;BQB=1;MQ0F=0;ICB=-;HOB=-;AC=2;AN=2;DP4=0,1,2,7;MQ=20	GT:PL	1/1:105,10,0
Ref_Crab_Transcript_19498_306	258	G	T	78	DP=11;VDB=0.00520153;SGB=-0.662043;RPB=1;MQB=1;MQSB=1;BQB=1;MQ0F=0;ICB=-;HOB=-;AC=2;AN=2;DP4=0,1,2,7;MQ=20	GT:PL	1/1:105,10,0
Ref_Crab_Transcript_19498_306	264	T	C	78	DP=10;VDB=0.00520153;SGB=-0.662043;RPB=1;MQB=1;MQSB=1;BQB=1;MQ0F=0;ICB=-;HOB=-;AC=2;AN=2;DP4=0,1,2,7;MQ=20	GT:PL	1/1:105,10,0
Ref_Crab_Transcript_19498_306	266	A	G	71	DP=10;VDB=0.0122479;SGB=-0.651104;RPB=1;MQB=1;MQSB=1;BQB=1;MQ0F=0;ICB=-;HOB=-;AC=2;AN=2;DP4=0,1,2,6;MQ=20	GT:PL	1/1:98,7,0
Ref_Crab_Transcript_19537_490	271	C	T	58	DP=40;VDB=0.143652;SGB=-0.692067;RPB=0.999901;MQB=1;MQSB=1;BQB=0.903885;MQ0F=0;ICB=1;HOB=0.5;AC=1;AN=2;DP4=10,9,17,3;MQ=20	GT:PL	0/1:91,0,124
Ref_Crab_Transcript_19605_1273	97	T	C	51	DP=55;VDB=9.84163e-06;SGB=-0.690438;RPB=0.162993;MQB=1;MQSB=1;BQB=0.382351;MQ0F=0;ICB=1;HOB=0.5;AC=1;AN=2;DP4=6,14,14,3;MQ=20	GT:PL	0/1:84,0,128
Ref_Crab_Transcript_19623_462	155	G	C	40.2521	DP=22;VDB=0.226103;SGB=-0.651104;RPB=0.381255;MQB=1;MQSB=1;BQB=0.401938;MQ0F=0;ICB=1;HOB=0.5;AC=1;AN=2;DP4=9,3,3,5;MQ=20	GT:PL	0/1:73,0,95
Ref_Crab_Transcript_19703_400	3	C	G	65	DP=14;VDB=5.52906e-06;SGB=-0.662043;RPB=1;MQB=1;MQSB=0.95494;BQB=0.983051;MQ0F=0;ICB=1;HOB=0.5;AC=1;AN=2;DP4=2,1,3,6;MQ=20	GT:PL	0/1:99,0,22
Ref_Crab_Transcript_19755_403	4	T	A	37.2457	DP=26;VDB=1.33331e-05;SGB=-0.651104;RPB=0.0474718;MQB=1;MQSB=1;BQB=0.97357;MQ0F=0;ICB=1;HOB=0.5;AC=1;AN=2;DP4=6,6,5,3;MQ=20	GT:PL	0/1:70,0,107
Ref_Crab_Transcript_19856_1450	367	G	A	55	DP=18;VDB=0.565813;SGB=-0.662043;RPB=0.848133;MQB=1;MQSB=1;BQB=0.939528;MQ0F=0;ICB=1;HOB=0.5;AC=1;AN=2;DP4=5,4,3,6;MQ=20	GT:PL	0/1:88,0,89
Ref_Crab_Transcript_19893_360	39	G	T	104	DP=31;VDB=0.000514655;SGB=-0.692067;RPB=0.49387;MQB=1;MQSB=1;BQB=0.991328;MQ0F=0;ICB=1;HOB=0.5;AC=1;AN=2;DP4=5,5,10,10;MQ=20	GT:PL	0/1:137,0,72
Ref_Crab_Transcript_19999_805	713	C	G	33.2687	DP=17;VDB=0.640324;SGB=-0.636426;RPB=0.865847;MQB=1;MQSB=1;BQB=0.252539;MQ0F=0;ICB=1;HOB=0.5;AC=1;AN=2;DP4=1,9,2,5;MQ=20	GT:PL	0/1:66,0,79
Ref_Crab_Transcript_20023_710	494	T	C	66	DP=12;VDB=0.466689;SGB=-0.662043;RPB=0.995736;MQB=1;MQSB=1;BQB=0.995736;MQ0F=0;ICB=1;HOB=0.5;AC=1;AN=2;DP4=3,0,5,4;MQ=20	GT:PL	0/1:100,0,18
Ref_Crab_Transcript_20062_1003	520	G	A	74	DP=27;VDB=0.131193;SGB=-0.683931;RPB=0.909669;MQB=1;MQSB=1;BQB=0.970489;MQ0F=0;ICB=1;HOB=0.5;AC=1;AN=2;DP4=6,6,8,5;MQ=20	GT:PL	0/1:107,0,103
Ref_Crab_Transcript_20093_1154	327	T	A	59	DP=20;VDB=0.960168;SGB=-0.670168;RPB=0.437922;MQB=1;MQSB=1;BQB=0.416862;MQ0F=0;ICB=1;HOB=0.5;AC=1;AN=2;DP4=5,5,3,7;MQ=20	GT:PL	0/1:92,0,96
Ref_Crab_Transcript_20123_405	284	C	A	35.4053	DP=12;VDB=0.182083;SGB=-0.616816;RPB=0.660716;MQB=0.982603;MQSB=0.95494;BQB=0.71154;MQ0F=0;ICB=1;HOB=0.5;AC=1;AN=2;DP4=5,1,2,4;MQ=20	GT:PL	0/1:68,0,59
Ref_Crab_Transcript_20228_372	239	A	G	78	DP=12;VDB=0.746049;SGB=-0.670168;RPB=0.4;MQB=1;MQSB=0.95494;BQB=0.75;MQ0F=0;ICB=-;HOB=-;AC=2;AN=2;DP4=0,2,5,5;MQ=20	GT:PL	1/1:106,0,2
Ref_Crab_Transcript_20246_327	189	T	G	58	DP=11;VDB=0.232635;SGB=-0.636426;RPB=1;MQB=1;MQSB=0.992367;BQB=1;MQ0F=0;ICB=-;HOB=-;AC=2;AN=2;DP4=1,0,3,4;MQ=20	GT:PL	1/1:85,4,0
Ref_Crab_Transcript_20270_453	1	G	A	53	DP=15;VDB=1.33331e-05;SGB=-0.651104;RPB=0.898397;MQB=1;MQSB=1;BQB=0.546428;MQ0F=0;ICB=1;HOB=0.5;AC=1;AN=2;DP4=1,6,4,4;MQ=20	GT:PL	0/1:86,0,64
Ref_Crab_Transcript_20270_453	2	G	A	59	DP=16;VDB=6.61497e-06;SGB=-0.662043;RPB=0.729697;MQB=1;MQSB=1;BQB=0.446318;MQ0F=0;ICB=1;HOB=0.5;AC=1;AN=2;DP4=2,5,3,6;MQ=20	GT:PL	0/1:92,0,69
Ref_Crab_Transcript_20270_453	4	G	A	47.2583	DP=27;VDB=5.52906e-06;SGB=-0.662043;RPB=0.955854;MQB=1;MQSB=1;BQB=0.997773;MQ0F=0;ICB=1;HOB=0.5;AC=1;AN=2;DP4=0,13,5,4;MQ=20	GT:PL	0/1:80,0,64
Ref_Crab_Transcript_20303_1184	1070	G	T	69	DP=18;VDB=0.97902;SGB=-0.670168;RPB=0.621145;MQB=1;MQSB=1;BQB=0.342519;MQ0F=0;ICB=1;HOB=0.5;AC=1;AN=2;DP4=0,7,5,5;MQ=20	GT:PL	0/1:102,0,48
Ref_Crab_Transcript_20309_598	494	T	G	80	DP=25;VDB=0.0445127;SGB=-0.683931;RPB=0.769328;MQB=1;MQSB=1;BQB=0.719678;MQ0F=0;ICB=1;HOB=0.5;AC=1;AN=2;DP4=5,6,5,8;MQ=20	GT:PL	0/1:113,0,97
Ref_Crab_Transcript_20405_871	4	G	A	42.0804	DP=14;VDB=8.49811e-07;SGB=-0.670168;RPB=0.816687;MQB=1;MQSB=0.966012;BQB=0.977751;MQ0F=0;ICB=1;HOB=0.5;AC=1;AN=2;DP4=3,1,4,6;MQ=20	GT:PL	0/1:75,0,35
Ref_Crab_Transcript_20551_539	394	T	C	31.1052	DP=23;VDB=0.827357;SGB=-0.636426;RPB=0.996435;MQB=1;MQSB=1;BQB=0.378204;MQ0F=0;ICB=1;HOB=0.5;AC=1;AN=2;DP4=4,8,3,4;MQ=20	GT:PL	0/1:64,0,110
Ref_Crab_Transcript_20594_712	292	A	C	87	DP=73;VDB=0.355454;SGB=-0.693147;RPB=0.987393;MQB=1;MQSB=1;BQB=0.30248;MQ0F=0;ICB=1;HOB=0.5;AC=1;AN=2;DP4=13,8,34,13;MQ=20	GT:PL	0/1:120,0,73
Ref_Crab_Transcript_20594_712	306	C	A	89	DP=80;VDB=0.340967;SGB=-0.693147;RPB=0.984989;MQB=1;MQSB=1;BQB=0.949632;MQ0F=0;ICB=1;HOB=0.5;AC=1;AN=2;DP4=16,9,37,17;MQ=20	GT:PL	0/1:122,0,76
Ref_Crab_Transcript_20720_384	60	C	T	62	DP=46;VDB=0.0349496;SGB=-0.69168;RPB=0.952396;MQB=1;MQSB=1;BQB=0.905254;MQ0F=0;ICB=1;HOB=0.5;AC=1;AN=2;DP4=21,6,14,5;MQ=20	GT:PL	0/1:95,0,113
Ref_Crab_Transcript_20746_375	212	G	A	53	DP=10;VDB=0.26936;SGB=-0.636426;RPB=0.824834;MQB=0.916482;MQSB=0.952347;BQB=0.458241;MQ0F=0;ICB=1;HOB=0.5;AC=1;AN=2;DP4=2,1,3,4;MQ=20	GT:PL	0/1:86,0,28
Ref_Crab_Transcript_20807_329	270	C	G	101	DP=17;VDB=1.09637e-07;SGB=-0.689466;RPB=1;MQB=1;MQSB=0.733333;BQB=1;MQ0F=0;ICB=-;HOB=-;AC=2;AN=2;DP4=0,1,2,14;MQ=20	GT:PL	1/1:128,28,0
Ref_Crab_Transcript_20808_349	62	C	T	90	DP=13;VDB=0.000418467;SGB=-0.680642;RPB=1;MQB=1;MQSB=1;BQB=1;MQ0F=0;ICB=-;HOB=-;AC=2;AN=2;DP4=0,1,9,3;MQ=20	GT:PL	1/1:117,19,0
Ref_Crab_Transcript_20808_349	66	G	C	90	DP=15;VDB=0.000418467;SGB=-0.680642;RPB=1;MQB=1;MQSB=1;BQB=1;MQ0F=0;ICB=-;HOB=-;AC=2;AN=2;DP4=0,1,9,3;MQ=20	GT:PL	1/1:117,19,0
Ref_Crab_Transcript_20852_403	187	A	G	36.3919	DP=14;VDB=0.922194;SGB=-0.636426;RPB=0.920266;MQB=0.961166;MQSB=1;BQB=0.623736;MQ0F=0;ICB=1;HOB=0.5;AC=1;AN=2;DP4=4,2,5,2;MQ=20	GT:PL	0/1:69,0,63
Ref_Crab_Transcript_20883_337	1	A	C	118	DP=30;VDB=1.30483e-15;SGB=-0.693054;RPB=0.5;MQB=1;MQSB=1;BQB=0.857143;MQ0F=0;ICB=-;HOB=-;AC=2;AN=2;DP4=1,1,7,21;MQ=20	GT:PL	1/1:145,33,0
Ref_Crab_Transcript_20883_337	3	T	C	102	DP=42;VDB=1.29641e-11;SGB=-0.69168;RPB=0.743137;MQB=1;MQSB=1;BQB=0.561295;MQ0F=0;ICB=1;HOB=0.5;AC=1;AN=2;DP4=2,10,7,12;MQ=20	GT:PL	0/1:135,0,76
Ref_Crab_Transcript_20887_513	450	T	C	60	DP=11;VDB=0.0367379;SGB=-0.651104;RPB=0.994805;MQB=1;MQSB=0.950952;BQB=0.979382;MQ0F=0;ICB=1;HOB=0.5;AC=1;AN=2;DP4=1,2,4,4;MQ=20	GT:PL	0/1:94,0,25
Ref_Crab_Transcript_20976_409	83	A	C	53	DP=15;VDB=0.396463;SGB=-0.651104;RPB=0.959011;MQB=1;MQSB=1;BQB=0.753577;MQ0F=0;ICB=1;HOB=0.5;AC=1;AN=2;DP4=6,1,4,4;MQ=20	GT:PL	0/1:86,0,61
Ref_Crab_Transcript_21005_500	227	G	A	34.9714	DP=43;VDB=0.345875;SGB=-0.688148;RPB=0.702176;MQB=1;MQSB=1;BQB=0.964838;MQ0F=0;ICB=1;HOB=0.5;AC=1;AN=2;DP4=12,16,12,3;MQ=20	GT:PL	0/1:68,0,149
Ref_Crab_Transcript_21021_505	286	C	T	34.1858	DP=18;VDB=0.276556;SGB=-0.636426;RPB=0.743558;MQB=1;MQSB=1;BQB=0.974693;MQ0F=0;ICB=1;HOB=0.5;AC=1;AN=2;DP4=1,10,3,4;MQ=20	GT:PL	0/1:67,0,81
Ref_Crab_Transcript_21100_451	161	T	C	61	DP=14;VDB=0.246704;SGB=-0.662043;RPB=0.651439;MQB=1;MQSB=0.961166;BQB=0.898397;MQ0F=0;ICB=1;HOB=0.5;AC=1;AN=2;DP4=2,2,5,4;MQ=20	GT:PL	0/1:94,0,37
Ref_Crab_Transcript_21100_451	186	C	T	57	DP=13;VDB=0.0479989;SGB=-0.651104;RPB=0.0643861;MQB=1;MQSB=0.961166;BQB=0.50373;MQ0F=0;ICB=1;HOB=0.5;AC=1;AN=2;DP4=3,2,4,4;MQ=20	GT:PL	0/1:90,0,51
Ref_Crab_Transcript_21103_533	191	G	C	69	DP=11;VDB=0.993834;SGB=-0.662043;RPB=1;MQB=1;MQSB=0.964642;BQB=0.111111;MQ0F=0;ICB=1;HOB=0.5;AC=1;AN=2;DP4=1,1,3,6;MQ=20	GT:PL	0/1:101,0,7
Ref_Crab_Transcript_21292_1377	712	A	G	31.7047	DP=127;VDB=0.492433;SGB=-0.693145;RPB=0.995311;MQB=1;MQSB=1;BQB=0.402269;MQ0F=0;ICB=1;HOB=0.5;AC=1;AN=2;DP4=47,39,21,19;MQ=20	GT:PL	0/1:65,0,122
Ref_Crab_Transcript_21352_371	92	T	G	41.2948	DP=19;VDB=0.229708;SGB=-0.651104;RPB=0.758709;MQB=1;MQSB=1;BQB=0.440857;MQ0F=0;ICB=1;HOB=0.5;AC=1;AN=2;DP4=9,2,5,3;MQ=20	GT:PL	0/1:74,0,86
Ref_Crab_Transcript_21352_371	101	G	C	41.1942	DP=23;VDB=0.320998;SGB=-0.662043;RPB=0.998018;MQB=1;MQSB=1;BQB=0.998018;MQ0F=0;ICB=1;HOB=0.5;AC=1;AN=2;DP4=12,2,6,3;MQ=20	GT:PL	0/1:74,0,89
Ref_Crab_Transcript_21352_371	163	T	G	33.8214	DP=31;VDB=0.25534;SGB=-0.670168;RPB=0.85994;MQB=1;MQSB=1;BQB=0.661845;MQ0F=0;ICB=1;HOB=0.5;AC=1;AN=2;DP4=12,9,3,7;MQ=20	GT:PL	0/1:67,0,137
Ref_Crab_Transcript_21352_371	172	C	G	55	DP=29;VDB=0.68905;SGB=-0.680642;RPB=0.85797;MQB=1;MQSB=1;BQB=0.1435;MQ0F=0;ICB=1;HOB=0.5;AC=1;AN=2;DP4=5,12,8,4;MQ=20	GT:PL	0/1:88,0,124
Ref_Crab_Transcript_21352_371	193	C	G	82	DP=25;VDB=0.0158592;SGB=-0.686358;RPB=0.996634;MQB=1;MQSB=1;BQB=0.761015;MQ0F=0;ICB=1;HOB=0.5;AC=1;AN=2;DP4=5,6,5,9;MQ=20	GT:PL	0/1:115,0,95
Ref_Crab_Transcript_21356_327	220	G	C	56	DP=13;VDB=0.718612;SGB=-0.651104;RPB=0.122456;MQB=1;MQSB=1;BQB=0.84246;MQ0F=0;ICB=1;HOB=0.5;AC=1;AN=2;DP4=2,3,3,5;MQ=20	GT:PL	0/1:89,0,52
Ref_Crab_Transcript_21407_676	465	C	T	62	DP=16;VDB=0.296895;SGB=-0.662043;RPB=0.499352;MQB=1;MQSB=1;BQB=0.605479;MQ0F=0;ICB=1;HOB=0.5;AC=1;AN=2;DP4=6,0,5,4;MQ=20	GT:PL	0/1:95,0,44
Ref_Crab_Transcript_21411_399	285	A	G	36.4051	DP=15;VDB=0.706942;SGB=-0.616816;RPB=0.813189;MQB=0.982603;MQSB=0.95494;BQB=0.186356;MQ0F=0;ICB=1;HOB=0.5;AC=1;AN=2;DP4=2,4,3,3;MQ=20	GT:PL	0/1:69,0,68
Ref_Crab_Transcript_21411_399	292	G	A	41.393	DP=13;VDB=0.816067;SGB=-0.636426;RPB=0.623736;MQB=0.961166;MQSB=1;BQB=0.0511259;MQ0F=0;ICB=1;HOB=0.5;AC=1;AN=2;DP4=2,4,3,4;MQ=20	GT:PL	0/1:74,0,65
Ref_Crab_Transcript_21411_399	310	A	C	43.3739	DP=13;VDB=0.810254;SGB=-0.636426;RPB=0.623736;MQB=0.961166;MQSB=1;BQB=0.899815;MQ0F=0;ICB=1;HOB=0.5;AC=1;AN=2;DP4=2,4,3,4;MQ=20	GT:PL	0/1:76,0,60
Ref_Crab_Transcript_21414_655	117	A	G	44.385	DP=15;VDB=0.94832;SGB=-0.651104;RPB=0.161524;MQB=1;MQSB=1;BQB=0.295105;MQ0F=0;ICB=1;HOB=0.5;AC=1;AN=2;DP4=4,3,6,2;MQ=20	GT:PL	0/1:77,0,73
Ref_Crab_Transcript_21416_478	172	C	T	30.3822	DP=13;VDB=0.335973;SGB=-0.616816;RPB=0.531709;MQB=0.961166;MQSB=1;BQB=0.777113;MQ0F=0;ICB=1;HOB=0.5;AC=1;AN=2;DP4=5,2,4,2;MQ=20	GT:PL	0/1:63,0,73
Ref_Crab_Transcript_21429_306	138	C	T	112	DP=12;VDB=0.771728;SGB=-0.676189;RPB=-;MQB=-;MQSB=0.964642;BQB=-;MQ0F=0;ICB=-;HOB=-;AC=2;AN=2;DP4=0,0,7,4;MQ=20	GT:PL	1/1:139,33,0
Ref_Crab_Transcript_21429_306	218	G	C	67	DP=24;VDB=0.716396;SGB=-0.676189;RPB=0.823185;MQB=1;MQSB=1;BQB=1;MQ0F=0;ICB=1;HOB=0.5;AC=1;AN=2;DP4=4,7,6,5;MQ=20	GT:PL	0/1:100,0,100
Ref_Crab_Transcript_21435_393	96	A	C	33.406	DP=12;VDB=0.660869;SGB=-0.616816;RPB=0.931779;MQB=0.982603;MQSB=0.95494;BQB=0.931779;MQ0F=0;ICB=1;HOB=0.5;AC=1;AN=2;DP4=3,3,4,2;MQ=20	GT:PL	0/1:66,0,69
Ref_Crab_Transcript_21444_693	25	C	G	112	DP=10;VDB=0.000502908;SGB=-0.670168;RPB=-;MQB=-;MQSB=0.952347;BQB=-;MQ0F=0;ICB=-;HOB=-;AC=2;AN=2;DP4=0,0,5,5;MQ=20	GT:PL	1/1:139,30,0
Ref_Crab_Transcript_21447_334	243	C	A	30.3544	DP=10;VDB=0.0249921;SGB=-0.590765;RPB=0.406082;MQB=0.974597;MQSB=0.924584;BQB=0.89338;MQ0F=0;ICB=1;HOB=0.5;AC=1;AN=2;DP4=1,3,2,3;MQ=20	GT:PL	0/1:63,0,46
Ref_Crab_Transcript_21447_334	266	A	G	39.228	DP=10;VDB=0.200927;SGB=-0.616816;RPB=0.783809;MQB=1.00775;MQSB=0.916482;BQB=1.00775;MQ0F=0;ICB=1;HOB=0.5;AC=1;AN=2;DP4=1,3,2,4;MQ=20	GT:PL	0/1:72,0,43
Ref_Crab_Transcript_21449_2087	1198	G	A	69	DP=11;VDB=0.113527;SGB=-0.662043;RPB=0;MQB=1;MQSB=0.964642;BQB=0.666667;MQ0F=0;ICB=1;HOB=0.5;AC=1;AN=2;DP4=1,1,3,6;MQ=20	GT:PL	0/1:101,0,7
Ref_Crab_Transcript_21465_370	258	T	C	47.3607	DP=20;VDB=0.246704;SGB=-0.662043;RPB=0.522385;MQB=1;MQSB=1;BQB=0.850154;MQ0F=0;ICB=1;HOB=0.5;AC=1;AN=2;DP4=8,3,6,3;MQ=20	GT:PL	0/1:80,0,93
Ref_Crab_Transcript_21469_683	151	C	T	30.3822	DP=13;VDB=0.164385;SGB=-0.616816;RPB=0.695312;MQB=0.961166;MQSB=1;BQB=0.777113;MQ0F=0;ICB=1;HOB=0.5;AC=1;AN=2;DP4=6,1,4,2;MQ=20	GT:PL	0/1:63,0,65
Ref_Crab_Transcript_21476_332	59	G	T	58	DP=23;VDB=0.139876;SGB=-0.662043;RPB=1;MQB=1;MQSB=1;BQB=1;MQ0F=0;ICB=-;HOB=-;AC=2;AN=2;DP4=1,0,1,8;MQ=20	GT:PL	1/1:85,10,0
Ref_Crab_Transcript_21476_332	69	G	T	137	DP=25;VDB=0.00251445;SGB=-0.69168;RPB=1;MQB=1;MQSB=1;BQB=1;MQ0F=0;ICB=-;HOB=-;AC=2;AN=2;DP4=1,0,10,9;MQ=20	GT:PL	1/1:164,42,0
Ref_Crab_Transcript_21476_332	179	G	T	60	DP=42;VDB=0.962183;SGB=-0.690438;RPB=0.918846;MQB=1;MQSB=1;BQB=0.612309;MQ0F=0;ICB=1;HOB=0.5;AC=1;AN=2;DP4=9,11,8,9;MQ=20	GT:PL	0/1:93,0,131
Ref_Crab_Transcript_21478_1183	614	G	A	82	DP=95;VDB=0.16556;SGB=-0.693141;RPB=0.887933;MQB=1;MQSB=1;BQB=0.54438;MQ0F=0;ICB=1;HOB=0.5;AC=1;AN=2;DP4=29,28,17,20;MQ=20	GT:PL	0/1:115,0,144
Ref_Crab_Transcript_21499_531	324	T	G	112	DP=13;VDB=0.0856353;SGB=-0.676189;RPB=-;MQB=-;MQSB=0.964642;BQB=-;MQ0F=0;ICB=-;HOB=-;AC=2;AN=2;DP4=0,0,7,4;MQ=20	GT:PL	1/1:139,33,0
Ref_Crab_Transcript_21503_473	58	A	G	53	DP=16;VDB=0.195133;SGB=-0.651104;RPB=0.651439;MQB=1;MQSB=1;BQB=0.68614;MQ0F=0;ICB=1;HOB=0.5;AC=1;AN=2;DP4=3,4,4,4;MQ=20	GT:PL	0/1:86,0,74
Ref_Crab_Transcript_21512_570	149	A	G	42.1582	DP=37;VDB=0.201873;SGB=-0.676189;RPB=0.733929;MQB=1;MQSB=1;BQB=0.30051;MQ0F=0;ICB=1;HOB=0.5;AC=1;AN=2;DP4=14,4,8,3;MQ=20	GT:PL	0/1:75,0,105
Ref_Crab_Transcript_21512_570	225	G	C	30.896	DP=24;VDB=0.811382;SGB=-0.651104;RPB=0.710548;MQB=1;MQSB=1;BQB=0.899903;MQ0F=0;ICB=1;HOB=0.5;AC=1;AN=2;DP4=6,10,4,4;MQ=20	GT:PL	0/1:64,0,130
Ref_Crab_Transcript_21514_357	111	C	T	34.7966	DP=50;VDB=0.999064;SGB=-0.688148;RPB=0.914729;MQB=1;MQSB=1;BQB=0.927502;MQ0F=0;ICB=1;HOB=0.5;AC=1;AN=2;DP4=20,12,11,4;MQ=20	GT:PL	0/1:68,0,137
Ref_Crab_Transcript_21519_356	92	A	C	50	DP=11;VDB=0.301201;SGB=-0.636426;RPB=0.442128;MQB=0.964642;MQSB=0.964642;BQB=0.924449;MQ0F=0;ICB=1;HOB=0.5;AC=1;AN=2;DP4=4,0,3,4;MQ=20	GT:PL	0/1:83,0,33
Ref_Crab_Transcript_21519_356	97	G	A	46.1251	DP=11;VDB=0.293704;SGB=-0.636426;RPB=0.442128;MQB=0.964642;MQSB=0.964642;BQB=0.924449;MQ0F=0;ICB=1;HOB=0.5;AC=1;AN=2;DP4=4,0,3,4;MQ=20	GT:PL	0/1:79,0,33
Ref_Crab_Transcript_21532_365	258	A	G	33.406	DP=14;VDB=0.0697235;SGB=-0.616816;RPB=0.186356;MQB=0.982603;MQSB=0.95494;BQB=0.813189;MQ0F=0;ICB=1;HOB=0.5;AC=1;AN=2;DP4=3,3,4,2;MQ=20	GT:PL	0/1:66,0,69
Ref_Crab_Transcript_21566_363	310	A	G	62	DP=15;VDB=0.00229481;SGB=-0.670168;RPB=0.852144;MQB=1;MQSB=1;BQB=0.236928;MQ0F=0;ICB=1;HOB=0.5;AC=1;AN=2;DP4=1,3,2,8;MQ=20	GT:PL	0/1:95,0,32
Ref_Crab_Transcript_21578_1641	134	C	A	50	DP=11;VDB=0.464927;SGB=-0.636426;RPB=0.924449;MQB=0.964642;MQSB=0.950952;BQB=0.562708;MQ0F=0;ICB=1;HOB=0.5;AC=1;AN=2;DP4=3,1,3,4;MQ=20	GT:PL	0/1:83,0,39
Ref_Crab_Transcript_21581_395	226	T	C	49.2469	DP=26;VDB=0.439806;SGB=-0.670168;RPB=0.540433;MQB=1;MQSB=1;BQB=0.975685;MQ0F=0;ICB=1;HOB=0.5;AC=1;AN=2;DP4=9,6,6,4;MQ=20	GT:PL	0/1:82,0,118
Ref_Crab_Transcript_21588_1570	769	G	T	77	DP=13;VDB=0.698224;SGB=-0.670168;RPB=0.3;MQB=1;MQSB=0.982603;BQB=0.35;MQ0F=0;ICB=1;HOB=0.5;AC=1;AN=2;DP4=1,1,5,5;MQ=20	GT:PL	0/1:107,0,4
Ref_Crab_Transcript_21600_521	106	C	G	86	DP=13;VDB=0.672885;SGB=-0.676189;RPB=0.636364;MQB=1;MQSB=1;BQB=0.545455;MQ0F=0;ICB=-;HOB=-;AC=2;AN=2;DP4=1,1,4,7;MQ=20	GT:PL	1/1:113,0,1
Ref_Crab_Transcript_21602_712	377	G	T	39.3853	DP=15;VDB=0.619542;SGB=-0.651104;RPB=0.144386;MQB=1;MQSB=1;BQB=0.651439;MQ0F=0;ICB=1;HOB=0.5;AC=1;AN=2;DP4=3,4,1,7;MQ=20	GT:PL	0/1:72,0,74
Ref_Crab_Transcript_21619_827	737	C	T	56	DP=13;VDB=0.0362608;SGB=-0.651104;RPB=0.0897512;MQB=1;MQSB=1;BQB=0.908075;MQ0F=0;ICB=1;HOB=0.5;AC=1;AN=2;DP4=1,4,3,5;MQ=20	GT:PL	0/1:89,0,48
Ref_Crab_Transcript_21636_717	152	C	T	65	DP=15;VDB=0.987188;SGB=-0.676189;RPB=0.808101;MQB=1;MQSB=1;BQB=0.841487;MQ0F=0;ICB=1;HOB=0.5;AC=1;AN=2;DP4=2,2,8,3;MQ=20	GT:PL	0/1:99,0,31
Ref_Crab_Transcript_21642_754	381	C	A	36.6722	DP=11;VDB=0.0402698;SGB=-0.636426;RPB=0.183296;MQB=0.916482;MQSB=1;BQB=0.274945;MQ0F=0;ICB=1;HOB=0.5;AC=1;AN=2;DP4=2,1,6,1;MQ=20	GT:PL	0/1:70,0,28
Ref_Crab_Transcript_21654_992	9	G	A	36.715	DP=10;VDB=0.0124503;SGB=-0.590765;RPB=1;MQB=1;MQSB=1;BQB=1;MQ0F=0;ICB=-;HOB=-;AC=2;AN=2;DP4=1,0,3,2;MQ=20	GT:PL	1/1:65,0,2
Ref_Crab_Transcript_21654_992	225	G	A	73	DP=131;VDB=0.0022331;SGB=-0.693147;RPB=0.821025;MQB=1;MQSB=1;BQB=0.619581;MQ0F=0;ICB=1;HOB=0.5;AC=1;AN=2;DP4=51,28,31,21;MQ=20	GT:PL	0/1:106,0,131
Ref_Crab_Transcript_21657_302	135	G	A	41.228	DP=12;VDB=0.973026;SGB=-0.616816;RPB=0.559863;MQB=1.00775;MQSB=1.00775;BQB=0.895781;MQ0F=0;ICB=1;HOB=0.5;AC=1;AN=2;DP4=3,1,3,3;MQ=20	GT:PL	0/1:74,0,42
Ref_Crab_Transcript_21687_594	335	G	A	41.3913	DP=13;VDB=0.115226;SGB=-0.636426;RPB=0.245404;MQB=0.961166;MQSB=1;BQB=0.899815;MQ0F=0;ICB=1;HOB=0.5;AC=1;AN=2;DP4=5,1,3,4;MQ=20	GT:PL	0/1:74,0,57
Ref_Crab_Transcript_21693_903	209	A	G	51	DP=10;VDB=0.750734;SGB=-0.636426;RPB=0.916482;MQB=0.916482;MQSB=1.00775;BQB=0.824834;MQ0F=0;ICB=1;HOB=0.5;AC=1;AN=2;DP4=2,1,4,3;MQ=20	GT:PL	0/1:84,0,28
Ref_Crab_Transcript_21757_470	144	A	G	33.3803	DP=13;VDB=0.956478;SGB=-0.616816;RPB=0.828239;MQB=0.961166;MQSB=0.961166;BQB=0.0511259;MQ0F=0;ICB=1;HOB=0.5;AC=1;AN=2;DP4=4,3,3,3;MQ=20	GT:PL	0/1:66,0,78
Ref_Crab_Transcript_21760_368	201	T	A	53	DP=10;VDB=0.01488;SGB=-0.636426;RPB=0.0916482;MQB=0.916482;MQSB=1.00775;BQB=0.733186;MQ0F=0;ICB=1;HOB=0.5;AC=1;AN=2;DP4=1,2,3,4;MQ=20	GT:PL	0/1:86,0,28
Ref_Crab_Transcript_21760_368	202	T	C	51	DP=10;VDB=0.01488;SGB=-0.636426;RPB=0.0916482;MQB=0.916482;MQSB=1.00775;BQB=0.916482;MQ0F=0;ICB=1;HOB=0.5;AC=1;AN=2;DP4=1,2,3,4;MQ=20	GT:PL	0/1:84,0,28
Ref_Crab_Transcript_21769_393	326	T	C	69	DP=17;VDB=0.0169832;SGB=-0.670168;RPB=0.92664;MQB=1;MQSB=1;BQB=0.79189;MQ0F=0;ICB=1;HOB=0.5;AC=1;AN=2;DP4=3,4,5,5;MQ=20	GT:PL	0/1:102,0,69
Ref_Crab_Transcript_21788_679	257	G	A	63	DP=15;VDB=0.0917263;SGB=-0.662043;RPB=0.64118;MQB=1;MQSB=1;BQB=0.569783;MQ0F=0;ICB=1;HOB=0.5;AC=1;AN=2;DP4=2,4,4,5;MQ=20	GT:PL	0/1:96,0,60
Ref_Crab_Transcript_21803_573	114	A	G	84	DP=23;VDB=0.792118;SGB=-0.683931;RPB=0.955854;MQB=1;MQSB=1;BQB=0.800143;MQ0F=0;ICB=1;HOB=0.5;AC=1;AN=2;DP4=5,4,6,7;MQ=20	GT:PL	0/1:117,0,80
Ref_Crab_Transcript_21832_1055	281	G	A	41.228	DP=10;VDB=0.784201;SGB=-0.616816;RPB=0.895781;MQB=1.00775;MQSB=1.00775;BQB=0.895781;MQ0F=0;ICB=1;HOB=0.5;AC=1;AN=2;DP4=3,1,3,3;MQ=20	GT:PL	0/1:74,0,42
Ref_Crab_Transcript_21894_679	308	C	T	64	DP=20;VDB=0.886355;SGB=-0.670168;RPB=0.979382;MQB=1;MQSB=1;BQB=0.403532;MQ0F=0;ICB=1;HOB=0.5;AC=1;AN=2;DP4=2,7,4,6;MQ=20	GT:PL	0/1:97,0,80
Ref_Crab_Transcript_21904_399	113	A	G	31.2304	DP=10;VDB=0.241952;SGB=-0.616816;RPB=0.335918;MQB=1.00775;MQSB=0.916482;BQB=0.559863;MQ0F=0;ICB=1;HOB=0.5;AC=1;AN=2;DP4=2,2,5,1;MQ=20	GT:PL	0/1:64,0,45
Ref_Crab_Transcript_21904_399	231	A	G	35.4053	DP=13;VDB=0.355087;SGB=-0.616816;RPB=0.186356;MQB=0.982603;MQSB=0.982603;BQB=0.542126;MQ0F=0;ICB=1;HOB=0.5;AC=1;AN=2;DP4=4,2,2,4;MQ=20	GT:PL	0/1:68,0,66
Ref_Crab_Transcript_21905_710	430	A	G	40.3166	DP=12;VDB=0.439212;SGB=-0.636426;RPB=0.506703;MQB=0.95494;MQSB=1;BQB=0.896474;MQ0F=0;ICB=1;HOB=0.5;AC=1;AN=2;DP4=2,3,2,5;MQ=20	GT:PL	0/1:73,0,55
Ref_Crab_Transcript_21913_842	266	G	A	55	DP=33;VDB=0.928309;SGB=-0.680642;RPB=0.968499;MQB=1;MQSB=1;BQB=0.34461;MQ0F=0;ICB=1;HOB=0.5;AC=1;AN=2;DP4=12,8,6,6;MQ=20	GT:PL	0/1:88,0,132
Ref_Crab_Transcript_21915_1236	378	A	G	30.8578	DP=118;VDB=0.00439003;SGB=-0.693143;RPB=0.97202;MQB=1;MQSB=1;BQB=0.756496;MQ0F=0;ICB=1;HOB=0.5;AC=1;AN=2;DP4=66,12,28,10;MQ=20	GT:PL	0/1:64,0,95
Ref_Crab_Transcript_21915_1236	843	G	T	68	DP=23;VDB=0.868083;SGB=-0.676189;RPB=0.595731;MQB=1;MQSB=1;BQB=0.369137;MQ0F=0;ICB=1;HOB=0.5;AC=1;AN=2;DP4=7,4,5,6;MQ=20	GT:PL	0/1:101,0,96
Ref_Crab_Transcript_21934_668	319	A	G	54	DP=13;VDB=0.853153;SGB=-0.651104;RPB=0.765017;MQB=1;MQSB=1;BQB=0.591555;MQ0F=0;ICB=1;HOB=0.5;AC=1;AN=2;DP4=3,2,5,3;MQ=20	GT:PL	0/1:87,0,51
Ref_Crab_Transcript_21946_435	282	A	T	42.3894	DP=13;VDB=0.209095;SGB=-0.636426;RPB=0.695312;MQB=0.961166;MQSB=0.961166;BQB=0.470358;MQ0F=0;ICB=1;HOB=0.5;AC=1;AN=2;DP4=3,3,3,4;MQ=20	GT:PL	0/1:75,0,66
Ref_Crab_Transcript_21959_797	686	G	A	53	DP=19;VDB=0.403259;SGB=-0.662043;RPB=0.76338;MQB=1;MQSB=1;BQB=0.0962474;MQ0F=0;ICB=1;HOB=0.5;AC=1;AN=2;DP4=4,6,3,6;MQ=20	GT:PL	0/1:86,0,97
Ref_Crab_Transcript_21978_754	511	C	T	69	DP=12;VDB=0.296895;SGB=-0.662043;RPB=0.777778;MQB=1;MQSB=0.950952;BQB=0.277778;MQ0F=0;ICB=1;HOB=0.5;AC=1;AN=2;DP4=1,1,5,4;MQ=20	GT:PL	0/1:101,0,7
Ref_Crab_Transcript_21992_1453	652	G	A	46.2338	DP=33;VDB=0.00243008;SGB=-0.686358;RPB=0.0405792;MQB=1;MQSB=1;BQB=0.627577;MQ0F=0;ICB=1;HOB=0.5;AC=1;AN=2;DP4=13,6,11,3;MQ=20	GT:PL	0/1:79,0,119
Ref_Crab_Transcript_22018_356	21	A	T	53	DP=11;VDB=0.00325824;SGB=-0.651104;RPB=1;MQB=1;MQSB=1;BQB=1;MQ0F=0;ICB=-;HOB=-;AC=2;AN=2;DP4=1,0,7,1;MQ=20	GT:PL	1/1:80,7,0
Ref_Crab_Transcript_22018_356	24	T	C	54	DP=11;VDB=0.00350122;SGB=-0.651104;RPB=1;MQB=1;MQSB=1;BQB=1;MQ0F=0;ICB=-;HOB=-;AC=2;AN=2;DP4=1,0,7,1;MQ=20	GT:PL	1/1:81,7,0
Ref_Crab_Transcript_22018_356	40	A	T	76	DP=11;VDB=0.0015167;SGB=-0.670168;RPB=-;MQB=-;MQSB=1;BQB=-;MQ0F=0;ICB=-;HOB=-;AC=2;AN=2;DP4=0,0,9,1;MQ=20	GT:PL	1/1:103,30,0
Ref_Crab_Transcript_22020_380	19	A	G	45.5815	DP=11;VDB=0.000327359;SGB=-0.662043;RPB=0.888889;MQB=1;MQSB=1;BQB=0.944444;MQ0F=0;ICB=1;HOB=0.5;AC=1;AN=2;DP4=2,0,8,1;MQ=20	GT:PL	0/1:76,0,5
Ref_Crab_Transcript_22021_432	102	T	C	35.3658	DP=11;VDB=0.0769344;SGB=-0.616816;RPB=0.742931;MQB=0.950952;MQSB=1;BQB=0.564628;MQ0F=0;ICB=1;HOB=0.5;AC=1;AN=2;DP4=5,0,4,2;MQ=20	GT:PL	0/1:68,0,43
Ref_Crab_Transcript_22032_361	127	C	T	38.3687	DP=12;VDB=0.0459681;SGB=-0.616816;RPB=0.8618;MQB=0.950952;MQSB=0.950952;BQB=0.891517;MQ0F=0;ICB=1;HOB=0.5;AC=1;AN=2;DP4=3,2,3,3;MQ=20	GT:PL	0/1:71,0,57
Ref_Crab_Transcript_22033_623	500	G	A	31.3177	DP=15;VDB=0.12166;SGB=-0.616816;RPB=0.997919;MQB=1;MQSB=1;BQB=0.509156;MQ0F=0;ICB=1;HOB=0.5;AC=1;AN=2;DP4=5,3,3,3;MQ=20	GT:PL	0/1:64,0,85
Ref_Crab_Transcript_22047_1183	742	C	T	33.2292	DP=12;VDB=0.844031;SGB=-0.616816;RPB=0.503877;MQB=1.00775;MQSB=0.916482;BQB=0.895781;MQ0F=0;ICB=1;HOB=0.5;AC=1;AN=2;DP4=2,2,1,5;MQ=20	GT:PL	0/1:66,0,45
Ref_Crab_Transcript_22079_307	3	T	A	87	DP=35;VDB=2.89569e-08;SGB=-0.676189;RPB=1;MQB=1;MQSB=0.95494;BQB=1;MQ0F=0;ICB=-;HOB=-;AC=2;AN=2;DP4=1,0,4,7;MQ=20	GT:PL	1/1:114,13,0
Ref_Crab_Transcript_22096_625	389	A	G	104	DP=11;VDB=0.44694;SGB=-0.676189;RPB=-;MQB=-;MQSB=1;BQB=-;MQ0F=0;ICB=-;HOB=-;AC=2;AN=2;DP4=0,0,2,9;MQ=20	GT:PL	1/1:131,33,0
Ref_Crab_Transcript_22112_636	399	A	T	40.8267	DP=37;VDB=0.960352;SGB=-0.676189;RPB=0.621367;MQB=1;MQSB=1;BQB=0.891802;MQ0F=0;ICB=1;HOB=0.5;AC=1;AN=2;DP4=8,15,5,6;MQ=20	GT:PL	0/1:74,0,143
Ref_Crab_Transcript_22113_1328	880	T	A	36.4044	DP=12;VDB=0.233931;SGB=-0.616816;RPB=0.71154;MQB=0.982603;MQSB=0.982603;BQB=0.931779;MQ0F=0;ICB=1;HOB=0.5;AC=1;AN=2;DP4=3,3,3,3;MQ=20	GT:PL	0/1:69,0,67
Ref_Crab_Transcript_22127_545	387	G	A	52	DP=53;VDB=0.223209;SGB=-0.690438;RPB=0.957319;MQB=1;MQSB=1;BQB=0.965041;MQ0F=0;ICB=1;HOB=0.5;AC=1;AN=2;DP4=17,19,8,9;MQ=20	GT:PL	0/1:85,0,148
Ref_Crab_Transcript_22132_593	528	A	G	112	DP=10;VDB=0.0109076;SGB=-0.670168;RPB=-;MQB=-;MQSB=0.952347;BQB=-;MQ0F=0;ICB=-;HOB=-;AC=2;AN=2;DP4=0,0,5,5;MQ=20	GT:PL	1/1:139,30,0
Ref_Crab_Transcript_22163_462	53	G	T	33.3377	DP=16;VDB=0.00249078;SGB=-0.636426;RPB=0.360231;MQB=1;MQSB=1;BQB=0.476686;MQ0F=0;ICB=1;HOB=0.5;AC=1;AN=2;DP4=6,3,5,2;MQ=20	GT:PL	0/1:66,0,89
Ref_Crab_Transcript_22163_462	223	G	A	56	DP=16;VDB=0.10981;SGB=-0.662043;RPB=0.892753;MQB=1;MQSB=1;BQB=0.994413;MQ0F=0;ICB=1;HOB=0.5;AC=1;AN=2;DP4=4,3,6,3;MQ=20	GT:PL	0/1:89,0,71
Ref_Crab_Transcript_22185_2102	1608	C	T	66	DP=95;VDB=0.347196;SGB=-0.693141;RPB=0.884562;MQB=1;MQSB=1;BQB=0.807487;MQ0F=0;ICB=1;HOB=0.5;AC=1;AN=2;DP4=30,27,26,11;MQ=20	GT:PL	0/1:99,0,142
Ref_Crab_Transcript_22230_953	2	C	T	30.4115	DP=19;VDB=6.61497e-06;SGB=-0.662043;RPB=0.711573;MQB=1;MQSB=1;BQB=0.810528;MQ0F=0;ICB=1;HOB=0.5;AC=1;AN=2;DP4=3,3,4,5;MQ=20	GT:PL	0/1:63,0,63
Ref_Crab_Transcript_22241_346	244	T	C	30.5666	DP=14;VDB=0.000502908;SGB=-0.670168;RPB=0.778801;MQB=1;MQSB=-;BQB=0.485537;MQ0F=0;ICB=1;HOB=0.5;AC=1;AN=2;DP4=4,0,10,0;MQ=20	GT:PL	0/1:64,0,26
Ref_Crab_Transcript_22243_903	404	T	C	33.2163	DP=18;VDB=0.968052;SGB=-0.636426;RPB=0.86274;MQB=1;MQSB=1;BQB=0.743558;MQ0F=0;ICB=1;HOB=0.5;AC=1;AN=2;DP4=6,5,4,3;MQ=20	GT:PL	0/1:66,0,104
Ref_Crab_Transcript_22261_852	107	A	G	35.3168	DP=20;VDB=0.346875;SGB=-0.651104;RPB=0.395294;MQB=1;MQSB=1;BQB=0.711124;MQ0F=0;ICB=1;HOB=0.5;AC=1;AN=2;DP4=6,5,6,2;MQ=20	GT:PL	0/1:68,0,101
Ref_Crab_Transcript_22275_323	89	G	A	33.406	DP=12;VDB=0.861911;SGB=-0.616816;RPB=0.931779;MQB=0.982603;MQSB=1;BQB=0.931779;MQ0F=0;ICB=1;HOB=0.5;AC=1;AN=2;DP4=4,2,4,2;MQ=20	GT:PL	0/1:66,0,66
Ref_Crab_Transcript_22280_430	248	C	T	180	DP=29;VDB=0.263784;SGB=-0.693079;RPB=-;MQB=-;MQSB=1;BQB=-;MQ0F=0;ICB=-;HOB=-;AC=2;AN=2;DP4=0,0,9,20;MQ=20	GT:PL	1/1:207,87,0
Ref_Crab_Transcript_22285_475	193	T	C	48.7785	DP=67;VDB=0.678075;SGB=-0.692352;RPB=0.999976;MQB=1;MQSB=1;BQB=0.915619;MQ0F=0;ICB=1;HOB=0.5;AC=1;AN=2;DP4=23,22,12,9;MQ=20	GT:PL	0/1:82,0,143
Ref_Crab_Transcript_22296_1120	286	G	C	40.5636	DP=11;VDB=0.401069;SGB=-0.651104;RPB=0.594025;MQB=1;MQSB=1;BQB=0.184981;MQ0F=0;ICB=1;HOB=0.5;AC=1;AN=2;DP4=3,0,7,1;MQ=20	GT:PL	0/1:74,0,20
Ref_Crab_Transcript_22315_316	284	C	G	41.2278	DP=10;VDB=0.036809;SGB=-0.616816;RPB=0.559863;MQB=1.00775;MQSB=1.00775;BQB=0.559863;MQ0F=0;ICB=1;HOB=0.5;AC=1;AN=2;DP4=1,3,3,3;MQ=20	GT:PL	0/1:74,0,43
Ref_Crab_Transcript_22319_492	229	C	T	32.3808	DP=14;VDB=0.730264;SGB=-0.616816;RPB=0.961166;MQB=0.961166;MQSB=1;BQB=0.777113;MQ0F=0;ICB=1;HOB=0.5;AC=1;AN=2;DP4=1,6,2,4;MQ=20	GT:PL	0/1:65,0,68
Ref_Crab_Transcript_22323_2183	1108	A	G	39.7913	DP=47;VDB=0.056073;SGB=-0.686358;RPB=0.437922;MQB=1;MQSB=1;BQB=0.0742677;MQ0F=0;ICB=1;HOB=0.5;AC=1;AN=2;DP4=19,11,9,5;MQ=20	GT:PL	0/1:73,0,136
Ref_Crab_Transcript_22354_1160	473	A	G	42.7647	DP=130;VDB=0.192017;SGB=-0.693145;RPB=0.632221;MQB=1;MQSB=1;BQB=0.912398;MQ0F=0;ICB=1;HOB=0.5;AC=1;AN=2;DP4=35,52,16,24;MQ=20	GT:PL	0/1:76,0,135
Ref_Crab_Transcript_22355_1742	2	C	A	42.1668	DP=15;VDB=1.33331e-05;SGB=-0.651104;RPB=0.50373;MQB=1;MQSB=1;BQB=0.679965;MQ0F=0;ICB=1;HOB=0.5;AC=1;AN=2;DP4=2,3,1,7;MQ=20	GT:PL	0/1:75,0,52
Ref_Crab_Transcript_22355_1742	3	T	A	35.2871	DP=16;VDB=1.33331e-05;SGB=-0.651104;RPB=0.50373;MQB=1;MQSB=1;BQB=0.765017;MQ0F=0;ICB=1;HOB=0.5;AC=1;AN=2;DP4=2,3,1,7;MQ=20	GT:PL	0/1:68,0,53
Ref_Crab_Transcript_22355_1742	4	C	A	34.0762	DP=17;VDB=5.52906e-06;SGB=-0.662043;RPB=0.785785;MQB=1;MQSB=1;BQB=0.341501;MQ0F=0;ICB=1;HOB=0.5;AC=1;AN=2;DP4=1,3,2,7;MQ=20	GT:PL	0/1:67,0,37
Ref_Crab_Transcript_22357_2576	382	A	G	42.907	DP=10;VDB=0.496552;SGB=-0.616816;RPB=0.346719;MQB=0.924584;MQSB=0.974597;BQB=0.924584;MQ0F=0;ICB=1;HOB=0.5;AC=1;AN=2;DP4=2,1,3,3;MQ=20	GT:PL	0/1:76,0,30
Ref_Crab_Transcript_22360_1105	1062	G	A	41.4045	DP=14;VDB=0.0243482;SGB=-0.636426;RPB=0.714506;MQB=0.966012;MQSB=1;BQB=0.885987;MQ0F=0;ICB=1;HOB=0.5;AC=1;AN=2;DP4=4,3,2,5;MQ=20	GT:PL	0/1:74,0,76
Ref_Crab_Transcript_22366_718	234	G	A	49.07	DP=11;VDB=0.93587;SGB=-0.636426;RPB=0.643095;MQB=0.964642;MQSB=0.950952;BQB=0.562708;MQ0F=0;ICB=1;HOB=0.5;AC=1;AN=2;DP4=1,3,4,3;MQ=20	GT:PL	0/1:82,0,40
Ref_Crab_Transcript_22385_431	250	G	T	55	DP=14;VDB=0.220756;SGB=-0.651104;RPB=0.399018;MQB=1;MQSB=0.966012;BQB=0.509156;MQ0F=0;ICB=1;HOB=0.5;AC=1;AN=2;DP4=3,3,4,4;MQ=20	GT:PL	0/1:88,0,64
Ref_Crab_Transcript_22410_612	254	A	G	42.772	DP=10;VDB=0.200896;SGB=-0.636426;RPB=0.641538;MQB=0.916482;MQSB=0.952347;BQB=0.366593;MQ0F=0;ICB=1;HOB=0.5;AC=1;AN=2;DP4=0,3,5,2;MQ=20	GT:PL	0/1:76,0,23
Ref_Crab_Transcript_22458_616	190	T	C	84	DP=69;VDB=0.839392;SGB=-0.693097;RPB=0.681896;MQB=1;MQSB=1;BQB=0.99894;MQ0F=0;ICB=1;HOB=0.5;AC=1;AN=2;DP4=17,18,20,10;MQ=20	GT:PL	0/1:117,0,144
Ref_Crab_Transcript_22462_1038	368	A	G	36.2677	DP=17;VDB=0.962524;SGB=-0.636426;RPB=0.958048;MQB=1;MQSB=1;BQB=0.970677;MQ0F=0;ICB=1;HOB=0.5;AC=1;AN=2;DP4=6,4,3,4;MQ=20	GT:PL	0/1:69,0,99
Ref_Crab_Transcript_22471_554	330	G	A	30.408	DP=14;VDB=0.171907;SGB=-0.636426;RPB=0.640197;MQB=0.966012;MQSB=1;BQB=0.777382;MQ0F=0;ICB=1;HOB=0.5;AC=1;AN=2;DP4=6,1,6,1;MQ=20	GT:PL	0/1:63,0,63
Ref_Crab_Transcript_22471_554	446	G	A	40.9402	DP=14;VDB=0.10512;SGB=-0.651104;RPB=0.646425;MQB=1;MQSB=1;BQB=0.98568;MQ0F=0;ICB=1;HOB=0.5;AC=1;AN=2;DP4=1,3,1,7;MQ=20	GT:PL	0/1:74,0,38
Ref_Crab_Transcript_22517_361	123	G	A	36.3857	DP=15;VDB=0.0307263;SGB=-0.636426;RPB=0.581345;MQB=1;MQSB=1;BQB=0.921243;MQ0F=0;ICB=1;HOB=0.5;AC=1;AN=2;DP4=6,2,5,2;MQ=20	GT:PL	0/1:69,0,77
Ref_Crab_Transcript_22527_522	62	T	C	38.2306	DP=11;VDB=0.0229453;SGB=-0.616816;RPB=0.335918;MQB=1.00775;MQSB=1;BQB=0.559863;MQ0F=0;ICB=1;HOB=0.5;AC=1;AN=2;DP4=4,0,4,2;MQ=20	GT:PL	0/1:71,0,36
Ref_Crab_Transcript_22527_522	63	C	G	38.2306	DP=11;VDB=0.0220214;SGB=-0.616816;RPB=0.335918;MQB=1.00775;MQSB=1;BQB=0.503877;MQ0F=0;ICB=1;HOB=0.5;AC=1;AN=2;DP4=4,0,4,2;MQ=20	GT:PL	0/1:71,0,36
Ref_Crab_Transcript_22527_522	64	T	A	35.3694	DP=11;VDB=0.0202676;SGB=-0.616816;RPB=0.742931;MQB=0.950952;MQSB=1;BQB=0.297172;MQ0F=0;ICB=1;HOB=0.5;AC=1;AN=2;DP4=4,1,4,2;MQ=20	GT:PL	0/1:68,0,52
Ref_Crab_Transcript_22532_1202	640	G	C	57	DP=28;VDB=0.902127;SGB=-0.676189;RPB=0.925036;MQB=1;MQSB=1;BQB=0.717865;MQ0F=0;ICB=1;HOB=0.5;AC=1;AN=2;DP4=8,8,5,6;MQ=20	GT:PL	0/1:90,0,127
Ref_Crab_Transcript_22544_362	25	G	A	31.23	DP=24;VDB=4.60213e-06;SGB=-0.680642;RPB=0.697593;MQB=1;MQSB=1;BQB=0.720273;MQ0F=0;ICB=1;HOB=0.5;AC=1;AN=2;DP4=7,1,12,0;MQ=20	GT:PL	0/1:64,0,58
Ref_Crab_Transcript_22546_2190	77	A	G	93	DP=157;VDB=0.0800302;SGB=-0.693147;RPB=0.576625;MQB=1;MQSB=1;BQB=0.910037;MQ0F=0;ICB=1;HOB=0.5;AC=1;AN=2;DP4=51,22,58,23;MQ=20	GT:PL	0/1:126,0,121
Ref_Crab_Transcript_22551_636	517	G	T	137	DP=39;VDB=2.63601e-05;SGB=-0.692717;RPB=-;MQB=-;MQSB=1;BQB=-;MQ0F=0;ICB=-;HOB=-;AC=2;AN=2;DP4=0,0,5,18;MQ=20	GT:PL	1/1:164,69,0
Ref_Crab_Transcript_22551_636	531	C	A	103	DP=47;VDB=2.38635e-06;SGB=-0.69312;RPB=0.992192;MQB=1;MQSB=1;BQB=0.361061;MQ0F=0;ICB=1;HOB=0.5;AC=1;AN=2;DP4=5,8,8,24;MQ=20	GT:PL	0/1:136,0,68
Ref_Crab_Transcript_22560_1977	844	C	G	60	DP=12;VDB=0.875232;SGB=-0.651104;RPB=0.774755;MQB=1;MQSB=0.950952;BQB=0.994805;MQ0F=0;ICB=1;HOB=0.5;AC=1;AN=2;DP4=1,2,4,4;MQ=20	GT:PL	0/1:94,0,25
Ref_Crab_Transcript_22575_510	201	C	T	37.6917	DP=91;VDB=0.189414;SGB=-0.692976;RPB=0.700321;MQB=1;MQSB=1;BQB=0.96619;MQ0F=0;ICB=1;HOB=0.5;AC=1;AN=2;DP4=29,30,16,10;MQ=20	GT:PL	0/1:71,0,136
Ref_Crab_Transcript_22582_418	24	T	C	32.3866	DP=192;VDB=0;SGB=-0.693147;RPB=0.000474757;MQB=1;MQSB=1;BQB=0.000144812;MQ0F=0;ICB=1;HOB=0.5;AC=1;AN=2;DP4=31,58,100,2;MQ=20	GT:PL	0/1:65,0,142
Ref_Crab_Transcript_22582_418	52	T	C	74	DP=238;VDB=0;SGB=-0.693147;RPB=1.00111e-07;MQB=1;MQSB=1;BQB=0.0930007;MQ0F=0;ICB=1;HOB=0.5;AC=1;AN=2;DP4=35,69,110,13;MQ=20	GT:PL	0/1:107,0,140
Ref_Crab_Transcript_22582_418	71	T	G	81	DP=275;VDB=6.40261e-32;SGB=-0.693147;RPB=2.09904e-11;MQB=1;MQSB=1;BQB=0.00203805;MQ0F=0;ICB=1;HOB=0.5;AC=1;AN=2;DP4=44,89,119,19;MQ=20	GT:PL	0/1:114,0,159
Ref_Crab_Transcript_22582_418	85	C	T	58	DP=286;VDB=4.48692e-20;SGB=-0.693147;RPB=2.47266e-08;MQB=1;MQSB=1;BQB=6.33567e-08;MQ0F=0;ICB=1;HOB=0.5;AC=1;AN=2;DP4=61,95,97,16;MQ=20	GT:PL	0/1:91,0,160
Ref_Crab_Transcript_22582_418	97	T	C	97	DP=304;VDB=0.99974;SGB=-0.693147;RPB=8.97128e-10;MQB=1;MQSB=1;BQB=0.00389904;MQ0F=0;ICB=1;HOB=0.5;AC=1;AN=2;DP4=57,90,109,39;MQ=20	GT:PL	0/1:130,0,155
Ref_Crab_Transcript_22587_605	213	G	A	44.7708	DP=77;VDB=0.390276;SGB=-0.692831;RPB=0.998736;MQB=1;MQSB=1;BQB=0.98106;MQ0F=0;ICB=1;HOB=0.5;AC=1;AN=2;DP4=30,22,15,9;MQ=20	GT:PL	0/1:78,0,135
Ref_Crab_Transcript_22608_567	411	A	G	70	DP=18;VDB=0.00611187;SGB=-0.670168;RPB=0.620971;MQB=1;MQSB=1;BQB=0.398871;MQ0F=0;ICB=1;HOB=0.5;AC=1;AN=2;DP4=1,5,4,6;MQ=20	GT:PL	0/1:103,0,52
Ref_Crab_Transcript_22608_567	425	T	C	34.1858	DP=18;VDB=0.00457774;SGB=-0.636426;RPB=0.743558;MQB=1;MQSB=1;BQB=0.717348;MQ0F=0;ICB=1;HOB=0.5;AC=1;AN=2;DP4=1,10,3,4;MQ=20	GT:PL	0/1:67,0,81
Ref_Crab_Transcript_22619_1185	295	A	G	89	DP=29;VDB=0.982733;SGB=-0.688148;RPB=0.964629;MQB=1;MQSB=1;BQB=0.547344;MQ0F=0;ICB=1;HOB=0.5;AC=1;AN=2;DP4=10,2,7,8;MQ=20	GT:PL	0/1:122,0,77
Ref_Crab_Transcript_22619_1185	379	T	C	41.2987	DP=35;VDB=0.5863;SGB=-0.686358;RPB=0.82553;MQB=1;MQSB=1;BQB=0.336829;MQ0F=0;ICB=1;HOB=0.5;AC=1;AN=2;DP4=7,12,12,2;MQ=20	GT:PL	0/1:74,0,130
Ref_Crab_Transcript_22652_1406	559	A	G	48.3893	DP=17;VDB=0.594311;SGB=-0.651104;RPB=0.971479;MQB=1;MQSB=1;BQB=0.600245;MQ0F=0;ICB=1;HOB=0.5;AC=1;AN=2;DP4=4,5,3,5;MQ=20	GT:PL	0/1:81,0,92
Ref_Crab_Transcript_22656_1613	624	A	C	53	DP=11;VDB=0.913442;SGB=-0.636426;RPB=0.824834;MQB=0.916482;MQSB=0.952347;BQB=0.733186;MQ0F=0;ICB=1;HOB=0.5;AC=1;AN=2;DP4=2,1,3,4;MQ=20	GT:PL	0/1:86,0,28
Ref_Crab_Transcript_22664_441	191	C	A	38.3687	DP=11;VDB=0.138089;SGB=-0.616816;RPB=0.564628;MQB=0.950952;MQSB=0.950952;BQB=0.8618;MQ0F=0;ICB=1;HOB=0.5;AC=1;AN=2;DP4=3,2,3,3;MQ=20	GT:PL	0/1:71,0,57
Ref_Crab_Transcript_22664_441	233	G	A	31.3177	DP=15;VDB=0.12166;SGB=-0.616816;RPB=0.153355;MQB=1;MQSB=1;BQB=0.135054;MQ0F=0;ICB=1;HOB=0.5;AC=1;AN=2;DP4=2,6,3,3;MQ=20	GT:PL	0/1:64,0,83
Ref_Crab_Transcript_22673_635	326	T	C	74	DP=14;VDB=0.656326;SGB=-0.670168;RPB=0.852144;MQB=1;MQSB=0.966012;BQB=0.816687;MQ0F=0;ICB=1;HOB=0.5;AC=1;AN=2;DP4=2,2,5,5;MQ=20	GT:PL	0/1:107,0,34
Ref_Crab_Transcript_22674_422	208	G	A	56	DP=38;VDB=0.0544704;SGB=-0.683931;RPB=0.973775;MQB=1;MQSB=1;BQB=0.230729;MQ0F=0;ICB=1;HOB=0.5;AC=1;AN=2;DP4=12,11,6,7;MQ=20	GT:PL	0/1:89,0,141
Ref_Crab_Transcript_22697_307	201	T	A	87	DP=70;VDB=0.231051;SGB=-0.693097;RPB=0.689201;MQB=1;MQSB=1;BQB=0.503259;MQ0F=0;ICB=1;HOB=0.5;AC=1;AN=2;DP4=7,29,7,23;MQ=20	GT:PL	0/1:120,0,133
Ref_Crab_Transcript_22709_1257	739	T	C	45.7534	DP=93;VDB=0.707718;SGB=-0.693079;RPB=0.603945;MQB=1;MQSB=1;BQB=0.982282;MQ0F=0;ICB=1;HOB=0.5;AC=1;AN=2;DP4=29,34,9,20;MQ=20	GT:PL	0/1:79,0,138
Ref_Crab_Transcript_22710_419	285	T	C	72	DP=30;VDB=0.0291876;SGB=-0.683931;RPB=0.425271;MQB=1;MQSB=1;BQB=0.814275;MQ0F=0;ICB=1;HOB=0.5;AC=1;AN=2;DP4=7,6,6,7;MQ=20	GT:PL	0/1:105,0,108
Ref_Crab_Transcript_22734_719	392	A	G	51	DP=11;VDB=0.0189358;SGB=-0.651104;RPB=0.360295;MQB=1;MQSB=1;BQB=0.979382;MQ0F=0;ICB=1;HOB=0.5;AC=1;AN=2;DP4=3,0,6,2;MQ=20	GT:PL	0/1:84,0,20
Ref_Crab_Transcript_22750_1095	663	G	A	35.268	DP=18;VDB=0.139238;SGB=-0.636426;RPB=0.0573643;MQB=1;MQSB=1;BQB=0.532719;MQ0F=0;ICB=1;HOB=0.5;AC=1;AN=2;DP4=7,3,4,3;MQ=20	GT:PL	0/1:68,0,93
Ref_Crab_Transcript_22750_1095	673	A	T	40.2672	DP=21;VDB=0.0357887;SGB=-0.651104;RPB=0.206831;MQB=1;MQSB=1;BQB=0.152183;MQ0F=0;ICB=1;HOB=0.5;AC=1;AN=2;DP4=8,3,4,4;MQ=20	GT:PL	0/1:73,0,95
Ref_Crab_Transcript_22768_453	259	A	C	64	DP=80;VDB=0.75748;SGB=-0.693054;RPB=0.571842;MQB=1;MQSB=1;BQB=0.685065;MQ0F=0;ICB=1;HOB=0.5;AC=1;AN=2;DP4=35,15,17,11;MQ=20	GT:PL	0/1:97,0,127
Ref_Crab_Transcript_22793_1007	66	T	C	31.2737	DP=17;VDB=0.0943152;SGB=-0.636426;RPB=0.943335;MQB=1;MQSB=1;BQB=0.650664;MQ0F=0;ICB=1;HOB=0.5;AC=1;AN=2;DP4=9,1,5,2;MQ=20	GT:PL	0/1:64,0,74
Ref_Crab_Transcript_22793_1007	230	G	C	36.5565	DP=59;VDB=0.794915;SGB=-0.690438;RPB=0.363526;MQB=1;MQSB=1;BQB=0.999685;MQ0F=0;ICB=1;HOB=0.5;AC=1;AN=2;DP4=20,22,9,8;MQ=20	GT:PL	0/1:70,0,144
Ref_Crab_Transcript_22798_567	187	A	G	93	DP=47;VDB=0.0286968;SGB=-0.692976;RPB=0.782218;MQB=1;MQSB=1;BQB=0.769517;MQ0F=0;ICB=1;HOB=0.5;AC=1;AN=2;DP4=16,3,18,8;MQ=20	GT:PL	0/1:126,0,81
Ref_Crab_Transcript_22802_407	91	C	A	30.3559	DP=12;VDB=0.265958;SGB=-0.590765;RPB=0.89338;MQB=0.974597;MQSB=0.924584;BQB=0.243649;MQ0F=0;ICB=1;HOB=0.5;AC=1;AN=2;DP4=4,0,2,3;MQ=20	GT:PL	0/1:63,0,38
Ref_Crab_Transcript_22802_407	101	C	T	31.3785	DP=13;VDB=0.407747;SGB=-0.616816;RPB=0.961166;MQB=0.961166;MQSB=0.961166;BQB=0.899815;MQ0F=0;ICB=1;HOB=0.5;AC=1;AN=2;DP4=5,2,2,4;MQ=20	GT:PL	0/1:64,0,73
Ref_Crab_Transcript_22814_443	205	T	G	35.3693	DP=11;VDB=0.0630446;SGB=-0.616816;RPB=0.564628;MQB=0.950952;MQSB=0.964642;BQB=0.891517;MQ0F=0;ICB=1;HOB=0.5;AC=1;AN=2;DP4=3,2,4,2;MQ=20	GT:PL	0/1:68,0,57
Ref_Crab_Transcript_22819_490	178	A	G	54	DP=123;VDB=0.0296151;SGB=-0.693147;RPB=0.73307;MQB=1;MQSB=1;BQB=0.927265;MQ0F=0;ICB=1;HOB=0.5;AC=1;AN=2;DP4=16,58,5,41;MQ=20	GT:PL	0/1:87,0,152
Ref_Crab_Transcript_22829_564	232	C	T	38.3854	DP=15;VDB=0.0168868;SGB=-0.636426;RPB=0.444739;MQB=1;MQSB=1;BQB=0.546428;MQ0F=0;ICB=1;HOB=0.5;AC=1;AN=2;DP4=3,5,2,5;MQ=20	GT:PL	0/1:71,0,85
Ref_Crab_Transcript_22832_1412	940	T	C	72	DP=89;VDB=0.946663;SGB=-0.69311;RPB=0.397613;MQB=1;MQSB=1;BQB=0.781851;MQ0F=0;ICB=1;HOB=0.5;AC=1;AN=2;DP4=24,31,14,17;MQ=20	GT:PL	0/1:105,0,147
Ref_Crab_Transcript_22837_404	280	T	G	66	DP=19;VDB=0.779437;SGB=-0.670168;RPB=0.206192;MQB=1;MQSB=1;BQB=0.991158;MQ0F=0;ICB=1;HOB=0.5;AC=1;AN=2;DP4=3,5,4,6;MQ=20	GT:PL	0/1:99,0,75
Ref_Crab_Transcript_22847_618	263	G	A	36.2879	DP=12;VDB=0.879935;SGB=-0.636426;RPB=0.584657;MQB=0.95494;MQSB=1;BQB=0.95494;MQ0F=0;ICB=1;HOB=0.5;AC=1;AN=2;DP4=2,3,1,6;MQ=20	GT:PL	0/1:69,0,55
Ref_Crab_Transcript_22862_907	269	A	C	120	DP=11;VDB=0.895021;SGB=-0.676189;RPB=-;MQB=-;MQSB=0.950952;BQB=-;MQ0F=0;ICB=-;HOB=-;AC=2;AN=2;DP4=0,0,5,6;MQ=20	GT:PL	1/1:147,33,0
Ref_Crab_Transcript_22882_564	331	A	T	38.3423	DP=16;VDB=0.000105247;SGB=-0.662043;RPB=0.00385331;MQB=1;MQSB=1;BQB=0.00459056;MQ0F=0;ICB=1;HOB=0.5;AC=1;AN=2;DP4=3,4,8,1;MQ=20	GT:PL	0/1:71,0,72
Ref_Crab_Transcript_22882_564	333	T	C	37.3926	DP=17;VDB=0.000105247;SGB=-0.662043;RPB=0.0342181;MQB=1;MQSB=1;BQB=0.00473937;MQ0F=0;ICB=1;HOB=0.5;AC=1;AN=2;DP4=3,5,8,1;MQ=20	GT:PL	0/1:70,0,81
Ref_Crab_Transcript_22882_564	335	C	G	46.3683	DP=18;VDB=0.000102413;SGB=-0.670168;RPB=0.0225184;MQB=1;MQSB=1;BQB=0.00180754;MQ0F=0;ICB=1;HOB=0.5;AC=1;AN=2;DP4=3,5,8,2;MQ=20	GT:PL	0/1:79,0,78
Ref_Crab_Transcript_22891_697	346	A	G	53	DP=12;VDB=0.918156;SGB=-0.662043;RPB=0.707404;MQB=1;MQSB=1;BQB=0.382304;MQ0F=0;ICB=1;HOB=0.5;AC=1;AN=2;DP4=1,2,7,2;MQ=20	GT:PL	0/1:87,0,20
Ref_Crab_Transcript_22903_1339	897	A	T	74	DP=14;VDB=0.032944;SGB=-0.670168;RPB=0.852144;MQB=1;MQSB=1;BQB=0.852144;MQ0F=0;ICB=1;HOB=0.5;AC=1;AN=2;DP4=2,2,4,6;MQ=20	GT:PL	0/1:107,0,34
Ref_Crab_Transcript_22925_659	382	A	G	42.7642	DP=45;VDB=0.252585;SGB=-0.688148;RPB=0.840309;MQB=1;MQSB=1;BQB=0.679662;MQ0F=0;ICB=1;HOB=0.5;AC=1;AN=2;DP4=6,24,6,9;MQ=20	GT:PL	0/1:76,0,132
Ref_Crab_Transcript_22926_413	247	T	A	50	DP=11;VDB=0.781662;SGB=-0.636426;RPB=0.924449;MQB=0.964642;MQSB=1;BQB=0.442128;MQ0F=0;ICB=1;HOB=0.5;AC=1;AN=2;DP4=0,4,3,4;MQ=20	GT:PL	0/1:83,0,33
Ref_Crab_Transcript_22926_413	263	G	A	37.3689	DP=11;VDB=0.641691;SGB=-0.616816;RPB=0.8618;MQB=0.950952;MQSB=1;BQB=0.950952;MQ0F=0;ICB=1;HOB=0.5;AC=1;AN=2;DP4=1,4,2,4;MQ=20	GT:PL	0/1:70,0,53
Ref_Crab_Transcript_22940_786	388	A	G	84	DP=145;VDB=0.907219;SGB=-0.693147;RPB=0.894721;MQB=1;MQSB=1;BQB=0.71367;MQ0F=0;ICB=1;HOB=0.5;AC=1;AN=2;DP4=50,30,41,22;MQ=20	GT:PL	0/1:117,0,135
Ref_Crab_Transcript_22958_602	196	C	T	46.3504	DP=18;VDB=0.237012;SGB=-0.651104;RPB=0.846389;MQB=1;MQSB=1;BQB=0.298531;MQ0F=0;ICB=1;HOB=0.5;AC=1;AN=2;DP4=6,4,4,4;MQ=20	GT:PL	0/1:79,0,97
Ref_Crab_Transcript_22975_1246	41	A	C	50	DP=37;VDB=0.00032762;SGB=-0.680642;RPB=0.273948;MQB=1;MQSB=1;BQB=0.186118;MQ0F=0;ICB=1;HOB=0.5;AC=1;AN=2;DP4=8,13,7,5;MQ=20	GT:PL	0/1:83,0,138
Ref_Crab_Transcript_22975_1246	652	C	A	62	DP=48;VDB=0.294356;SGB=-0.690438;RPB=0.670208;MQB=1;MQSB=1;BQB=0.98524;MQ0F=0;ICB=1;HOB=0.5;AC=1;AN=2;DP4=17,14,8,9;MQ=20	GT:PL	0/1:95,0,144
Ref_Crab_Transcript_22989_714	256	T	C	79	DP=13;VDB=0.522432;SGB=-0.670168;RPB=0.5;MQB=1;MQSB=0.95494;BQB=0.9;MQ0F=0;ICB=1;HOB=0.5;AC=1;AN=2;DP4=1,1,4,6;MQ=20	GT:PL	0/1:109,0,4
Ref_Crab_Transcript_22989_714	291	G	A	50	DP=12;VDB=0.827357;SGB=-0.636426;RPB=0.924449;MQB=0.964642;MQSB=0.964642;BQB=0.241161;MQ0F=0;ICB=1;HOB=0.5;AC=1;AN=2;DP4=1,3,3,4;MQ=20	GT:PL	0/1:83,0,40
Ref_Crab_Transcript_22994_787	594	A	G	49.3264	DP=14;VDB=0.0407425;SGB=-0.651104;RPB=0.195278;MQB=1;MQSB=1;BQB=0.927743;MQ0F=0;ICB=1;HOB=0.5;AC=1;AN=2;DP4=3,3,5,3;MQ=20	GT:PL	0/1:82,0,61
Ref_Crab_Transcript_22999_465	94	A	G	57	DP=13;VDB=0.259674;SGB=-0.651104;RPB=0.84246;MQB=1;MQSB=0.961166;BQB=0.765017;MQ0F=0;ICB=1;HOB=0.5;AC=1;AN=2;DP4=3,2,4,4;MQ=20	GT:PL	0/1:90,0,51
Ref_Crab_Transcript_23010_649	401	C	T	36.0228	DP=31;VDB=0.427987;SGB=-0.676189;RPB=0.865858;MQB=1;MQSB=1;BQB=0.406483;MQ0F=0;ICB=1;HOB=0.5;AC=1;AN=2;DP4=7,13,2,9;MQ=20	GT:PL	0/1:69,0,138
Ref_Crab_Transcript_23045_405	185	C	T	49.7708	DP=76;VDB=0.990689;SGB=-0.692831;RPB=0.24771;MQB=1;MQSB=1;BQB=0.985111;MQ0F=0;ICB=1;HOB=0.5;AC=1;AN=2;DP4=25,27,13,11;MQ=20	GT:PL	0/1:83,0,142
Ref_Crab_Transcript_23051_466	387	C	T	62	DP=28;VDB=0.148853;SGB=-0.688148;RPB=0.501616;MQB=1;MQSB=1;BQB=0.858314;MQ0F=0;ICB=1;HOB=0.5;AC=1;AN=2;DP4=5,8,2,13;MQ=20	GT:PL	0/1:95,0,105
Ref_Crab_Transcript_23053_747	409	G	T	38.3688	DP=11;VDB=0.906964;SGB=-0.616816;RPB=0.0891517;MQB=0.950952;MQSB=0.964642;BQB=0.742931;MQ0F=0;ICB=1;HOB=0.5;AC=1;AN=2;DP4=1,4,3,3;MQ=20	GT:PL	0/1:71,0,53
Ref_Crab_Transcript_23053_747	419	G	T	38.3688	DP=11;VDB=0.906964;SGB=-0.616816;RPB=0.564628;MQB=0.950952;MQSB=0.964642;BQB=0.0891517;MQ0F=0;ICB=1;HOB=0.5;AC=1;AN=2;DP4=1,4,3,3;MQ=20	GT:PL	0/1:71,0,53
Ref_Crab_Transcript_23053_747	425	A	G	38.3688	DP=11;VDB=0.906964;SGB=-0.616816;RPB=0.564628;MQB=0.950952;MQSB=0.964642;BQB=0.8618;MQ0F=0;ICB=1;HOB=0.5;AC=1;AN=2;DP4=1,4,3,3;MQ=20	GT:PL	0/1:71,0,53
Ref_Crab_Transcript_23075_342	147	T	C	57	DP=46;VDB=0.00578827;SGB=-0.692067;RPB=0.0179125;MQB=0.030915;MQSB=0.98679;BQB=0.60827;MQ0F=0;ICB=1;HOB=0.5;AC=1;AN=2;DP4=23,3,17,3;MQ=23	GT:PL	0/1:90,0,173
Ref_Crab_Transcript_23078_478	426	C	T	100	DP=60;VDB=0.00352362;SGB=-0.692976;RPB=0.124871;MQB=1;MQSB=1;BQB=0.558758;MQ0F=0;ICB=1;HOB=0.5;AC=1;AN=2;DP4=16,13,12,14;MQ=20	GT:PL	0/1:133,0,137
Ref_Crab_Transcript_23099_522	187	T	C	40.3788	DP=13;VDB=0.90274;SGB=-0.636426;RPB=0.828239;MQB=0.961166;MQSB=1;BQB=0.899815;MQ0F=0;ICB=1;HOB=0.5;AC=1;AN=2;DP4=3,3,5,2;MQ=20	GT:PL	0/1:73,0,66
Ref_Crab_Transcript_23114_586	177	C	A	42.4001	DP=18;VDB=0.993304;SGB=-0.662043;RPB=0.543806;MQB=1;MQSB=1;BQB=0.26334;MQ0F=0;ICB=1;HOB=0.5;AC=1;AN=2;DP4=3,6,2,7;MQ=20	GT:PL	0/1:75,0,88
Ref_Crab_Transcript_23123_634	234	G	T	89	DP=41;VDB=0.266457;SGB=-0.692562;RPB=0.997693;MQB=1;MQSB=1;BQB=0.984508;MQ0F=0;ICB=1;HOB=0.5;AC=1;AN=2;DP4=10,8,14,8;MQ=20	GT:PL	0/1:122,0,115
Ref_Crab_Transcript_23148_874	173	A	G	94	DP=102;VDB=0.811124;SGB=-0.693146;RPB=0.596469;MQB=1;MQSB=1;BQB=0.891334;MQ0F=0;ICB=1;HOB=0.5;AC=1;AN=2;DP4=34,21,23,20;MQ=20	GT:PL	0/1:127,0,137
Ref_Crab_Transcript_23148_874	757	G	A	105	DP=171;VDB=0.00152263;SGB=-0.693147;RPB=0.415184;MQB=1;MQSB=1;BQB=0.747905;MQ0F=0;ICB=1;HOB=0.5;AC=1;AN=2;DP4=6,82,10,70;MQ=20	GT:PL	0/1:138,0,129
Ref_Crab_Transcript_23154_491	91	G	C	90	DP=10;VDB=0.966939;SGB=-0.651104;RPB=-;MQB=-;MQSB=0.900802;BQB=-;MQ0F=0;ICB=-;HOB=-;AC=2;AN=2;DP4=0,0,5,3;MQ=20	GT:PL	1/1:117,24,0
Ref_Crab_Transcript_23169_620	528	A	C	32.6045	DP=51;VDB=0.0655855;SGB=-0.688148;RPB=0.722527;MQB=1;MQSB=1;BQB=0.974477;MQ0F=0;ICB=1;HOB=0.5;AC=1;AN=2;DP4=11,25,4,11;MQ=20	GT:PL	0/1:66,0,147
Ref_Crab_Transcript_23170_415	2	A	T	38.326	DP=10;VDB=9.50611e-05;SGB=-0.636426;RPB=0.857143;MQB=1;MQSB=0.974597;BQB=0.928571;MQ0F=0;ICB=1;HOB=0.5;AC=1;AN=2;DP4=0,2,4,3;MQ=20	GT:PL	0/1:71,0,11
Ref_Crab_Transcript_23214_1155	535	C	A	64	DP=96;VDB=0.270913;SGB=-0.69311;RPB=0.475942;MQB=1;MQSB=1;BQB=0.601117;MQ0F=0;ICB=1;HOB=0.5;AC=1;AN=2;DP4=29,28,16,15;MQ=20	GT:PL	0/1:97,0,142
Ref_Crab_Transcript_23233_972	414	A	G	45.9527	DP=39;VDB=0.646266;SGB=-0.680642;RPB=0.935592;MQB=1;MQSB=1;BQB=0.183369;MQ0F=0;ICB=1;HOB=0.5;AC=1;AN=2;DP4=6,17,4,8;MQ=20	GT:PL	0/1:79,0,136
Ref_Crab_Transcript_23258_456	222	G	A	37.1054	DP=10;VDB=0.794185;SGB=-0.616816;RPB=0.895781;MQB=1.00775;MQSB=1.00775;BQB=0.503877;MQ0F=0;ICB=1;HOB=0.5;AC=1;AN=2;DP4=1,3,3,3;MQ=20	GT:PL	0/1:70,0,33
Ref_Crab_Transcript_23264_429	339	A	T	59	DP=11;VDB=0.621812;SGB=-0.651104;RPB=0.954207;MQB=1;MQSB=0.964642;BQB=0.920044;MQ0F=0;ICB=1;HOB=0.5;AC=1;AN=2;DP4=1,2,3,5;MQ=20	GT:PL	0/1:93,0,25
Ref_Crab_Transcript_23297_323	300	G	C	84	DP=12;VDB=0.000604457;SGB=-0.662043;RPB=1;MQB=1;MQSB=0.916482;BQB=1;MQ0F=0;ICB=-;HOB=-;AC=2;AN=2;DP4=1,0,6,3;MQ=20	GT:PL	1/1:111,14,0
Ref_Crab_Transcript_23319_1554	70	C	T	51	DP=43;VDB=3.87532e-05;SGB=-0.69168;RPB=0.575261;MQB=1;MQSB=1;BQB=0.55312;MQ0F=0;ICB=1;HOB=0.5;AC=1;AN=2;DP4=16,8,16,3;MQ=20	GT:PL	0/1:84,0,126
Ref_Crab_Transcript_23324_338	166	A	G	61	DP=154;VDB=4.61648e-18;SGB=-0.693147;RPB=0.614023;MQB=1;MQSB=1;BQB=0.822062;MQ0F=0;ICB=1;HOB=0.5;AC=1;AN=2;DP4=33,11,80,23;MQ=20	GT:PL	0/1:94,0,35
Ref_Crab_Transcript_23355_870	517	C	A	97	DP=254;VDB=0.881521;SGB=-0.693147;RPB=0.168852;MQB=1;MQSB=1;BQB=0.00251535;MQ0F=0;ICB=1;HOB=0.5;AC=1;AN=2;DP4=77,56,59,52;MQ=20	GT:PL	0/1:130,0,147
Ref_Crab_Transcript_23378_606	133	G	A	56	DP=34;VDB=0.684519;SGB=-0.686358;RPB=0.544711;MQB=1;MQSB=1;BQB=0.879216;MQ0F=0;ICB=1;HOB=0.5;AC=1;AN=2;DP4=12,8,10,4;MQ=20	GT:PL	0/1:89,0,130
Ref_Crab_Transcript_23379_466	139	T	C	49.0839	DP=31;VDB=0.167715;SGB=-0.676189;RPB=0.195228;MQB=1;MQSB=1;BQB=0.36477;MQ0F=0;ICB=1;HOB=0.5;AC=1;AN=2;DP4=7,12,6,5;MQ=20	GT:PL	0/1:82,0,136
Ref_Crab_Transcript_23398_506	205	C	A	69	DP=12;VDB=0.637391;SGB=-0.662043;RPB=0.888889;MQB=1;MQSB=0.964642;BQB=0;MQ0F=0;ICB=1;HOB=0.5;AC=1;AN=2;DP4=1,1,3,6;MQ=20	GT:PL	0/1:101,0,7
Ref_Crab_Transcript_23403_1163	744	A	G	40.2345	DP=20;VDB=0.874002;SGB=-0.651104;RPB=0.628116;MQB=1;MQSB=1;BQB=0.0627497;MQ0F=0;ICB=1;HOB=0.5;AC=1;AN=2;DP4=8,4,3,5;MQ=20	GT:PL	0/1:73,0,104
Ref_Crab_Transcript_23403_1163	777	C	T	63	DP=21;VDB=0.865097;SGB=-0.670168;RPB=0.300979;MQB=1;MQSB=1;BQB=0.707715;MQ0F=0;ICB=1;HOB=0.5;AC=1;AN=2;DP4=5,5,5,5;MQ=20	GT:PL	0/1:96,0,96
Ref_Crab_Transcript_23410_516	181	A	T	58	DP=16;VDB=0.167636;SGB=-0.662043;RPB=0.840624;MQB=1;MQSB=1;BQB=0.984496;MQ0F=0;ICB=1;HOB=0.5;AC=1;AN=2;DP4=3,3,6,3;MQ=20	GT:PL	0/1:91,0,61
Ref_Crab_Transcript_23411_1189	473	T	C	66	DP=23;VDB=0.511287;SGB=-0.680642;RPB=0.38335;MQB=1;MQSB=1;BQB=0.983099;MQ0F=0;ICB=1;HOB=0.5;AC=1;AN=2;DP4=2,9,3,9;MQ=20	GT:PL	0/1:99,0,86
Ref_Crab_Transcript_23450_951	414	A	G	39.9071	DP=10;VDB=0.779105;SGB=-0.616816;RPB=0.809011;MQB=0.924584;MQSB=0.924584;BQB=0.462292;MQ0F=0;ICB=1;HOB=0.5;AC=1;AN=2;DP4=2,1,4,2;MQ=20	GT:PL	0/1:73,0,30
Ref_Crab_Transcript_23464_307	131	A	G	51	DP=16;VDB=0.428974;SGB=-0.651104;RPB=0.639741;MQB=1;MQSB=1;BQB=1;MQ0F=0;ICB=1;HOB=0.5;AC=1;AN=2;DP4=6,2,4,4;MQ=20	GT:PL	0/1:84,0,75
Ref_Crab_Transcript_23474_2729	2439	C	T	36.6833	DP=50;VDB=0.202899;SGB=-0.686358;RPB=0.409173;MQB=1;MQSB=1;BQB=0.760453;MQ0F=0;ICB=1;HOB=0.5;AC=1;AN=2;DP4=11,21,4,10;MQ=20	GT:PL	0/1:70,0,149
Ref_Crab_Transcript_23482_657	450	C	T	38.2283	DP=10;VDB=0.758048;SGB=-0.616816;RPB=0.279932;MQB=1.00775;MQSB=0.916482;BQB=0.559863;MQ0F=0;ICB=1;HOB=0.5;AC=1;AN=2;DP4=3,1,4,2;MQ=20	GT:PL	0/1:71,0,42
Ref_Crab_Transcript_23499_504	438	G	A	54	DP=24;VDB=0.0141163;SGB=-0.670168;RPB=0.731668;MQB=1;MQSB=1;BQB=0.328009;MQ0F=0;ICB=1;HOB=0.5;AC=1;AN=2;DP4=3,11,5,5;MQ=20	GT:PL	0/1:87,0,104
Ref_Crab_Transcript_23510_321	78	T	C	39.2304	DP=10;VDB=0.162254;SGB=-0.616816;RPB=0.895781;MQB=1.00775;MQSB=1;BQB=0.559863;MQ0F=0;ICB=1;HOB=0.5;AC=1;AN=2;DP4=0,4,2,4;MQ=20	GT:PL	0/1:72,0,36
Ref_Crab_Transcript_23510_321	134	G	T	48.3893	DP=17;VDB=0.857229;SGB=-0.651104;RPB=0.743567;MQB=1;MQSB=1;BQB=0.283536;MQ0F=0;ICB=1;HOB=0.5;AC=1;AN=2;DP4=3,6,3,5;MQ=20	GT:PL	0/1:81,0,90
Ref_Crab_Transcript_23510_321	147	A	G	48.282	DP=14;VDB=0.781662;SGB=-0.636426;RPB=0.95494;MQB=0.95494;MQSB=0.95494;BQB=0.95494;MQ0F=0;ICB=1;HOB=0.5;AC=1;AN=2;DP4=2,3,3,4;MQ=20	GT:PL	0/1:81,0,55
Ref_Crab_Transcript_23523_1140	778	T	G	33.3803	DP=13;VDB=0.5413;SGB=-0.616816;RPB=0.961166;MQB=0.961166;MQSB=1;BQB=0.899815;MQ0F=0;ICB=1;HOB=0.5;AC=1;AN=2;DP4=2,5,3,3;MQ=20	GT:PL	0/1:66,0,76
Ref_Crab_Transcript_23584_938	549	C	T	53	DP=20;VDB=0.222697;SGB=-0.662043;RPB=0.885207;MQB=1;MQSB=1;BQB=0.988522;MQ0F=0;ICB=1;HOB=0.5;AC=1;AN=2;DP4=7,4,4,5;MQ=20	GT:PL	0/1:86,0,100
Ref_Crab_Transcript_23593_732	340	C	T	38.2425	DP=11;VDB=0.679639;SGB=-0.616816;RPB=0.503877;MQB=1.00775;MQSB=1.00775;BQB=0.895781;MQ0F=0;ICB=1;HOB=0.5;AC=1;AN=2;DP4=3,1,3,3;MQ=20	GT:PL	0/1:71,0,42
Ref_Crab_Transcript_23643_633	61	A	G	66	DP=11;VDB=0.0149639;SGB=-0.662043;RPB=0.166667;MQB=1;MQSB=1;BQB=0.222222;MQ0F=0;ICB=1;HOB=0.5;AC=1;AN=2;DP4=2,0,6,3;MQ=20	GT:PL	0/1:96,0,5
Ref_Crab_Transcript_23700_608	524	C	T	34.4053	DP=12;VDB=0.191363;SGB=-0.616816;RPB=0.982603;MQB=0.982603;MQSB=0.95494;BQB=0.931779;MQ0F=0;ICB=1;HOB=0.5;AC=1;AN=2;DP4=4,2,3,3;MQ=20	GT:PL	0/1:67,0,66
Ref_Crab_Transcript_23700_608	525	T	C	37.3753	DP=12;VDB=0.191363;SGB=-0.616816;RPB=0.8618;MQB=0.950952;MQSB=0.964642;BQB=0.742931;MQ0F=0;ICB=1;HOB=0.5;AC=1;AN=2;DP4=4,1,3,3;MQ=20	GT:PL	0/1:70,0,52
Ref_Crab_Transcript_23703_1543	194	G	T	44.8117	DP=115;VDB=0.356786;SGB=-0.693139;RPB=0.451218;MQB=1;MQSB=1;BQB=0.994074;MQ0F=0;ICB=1;HOB=0.5;AC=1;AN=2;DP4=35,41,20,16;MQ=20	GT:PL	0/1:78,0,135
Ref_Crab_Transcript_23704_344	36	C	T	43.1737	DP=28;VDB=0.0361612;SGB=-0.676189;RPB=0.369443;MQB=1;MQSB=1;BQB=0.766583;MQ0F=0;ICB=1;HOB=0.5;AC=1;AN=2;DP4=11,6,8,3;MQ=20	GT:PL	0/1:76,0,121
Ref_Crab_Transcript_23704_344	123	A	C	55	DP=69;VDB=0.30161;SGB=-0.692562;RPB=0.910672;MQB=1;MQSB=1;BQB=0.999807;MQ0F=0;ICB=1;HOB=0.5;AC=1;AN=2;DP4=24,22,11,11;MQ=20	GT:PL	0/1:88,0,141
Ref_Crab_Transcript_23712_494	470	T	C	52	DP=14;VDB=0.00746206;SGB=-0.651104;RPB=0.94925;MQB=1;MQSB=1;BQB=0.811936;MQ0F=0;ICB=1;HOB=0.5;AC=1;AN=2;DP4=4,2,5,3;MQ=20	GT:PL	0/1:85,0,61
Ref_Crab_Transcript_23714_307	169	A	G	38.2275	DP=21;VDB=0.342481;SGB=-0.651104;RPB=0.236815;MQB=1;MQSB=1;BQB=0.304076;MQ0F=0;ICB=1;HOB=0.5;AC=1;AN=2;DP4=8,4,5,3;MQ=20	GT:PL	0/1:71,0,105
Ref_Crab_Transcript_23714_307	207	C	A	63	DP=21;VDB=0.957832;SGB=-0.680642;RPB=0.328363;MQB=1;MQSB=1;BQB=0.736714;MQ0F=0;ICB=1;HOB=0.5;AC=1;AN=2;DP4=6,3,9,3;MQ=20	GT:PL	0/1:96,0,78
Ref_Crab_Transcript_23716_995	113	T	C	98	DP=93;VDB=6.87955e-05;SGB=-0.693147;RPB=0.908133;MQB=1;MQSB=1;BQB=0.822709;MQ0F=0;ICB=1;HOB=0.5;AC=1;AN=2;DP4=18,12,37,24;MQ=20	GT:PL	0/1:131,0,82
Ref_Crab_Transcript_23736_573	411	G	A	55	DP=45;VDB=0.102351;SGB=-0.688148;RPB=0.140621;MQB=1;MQSB=1;BQB=0.963591;MQ0F=0;ICB=1;HOB=0.5;AC=1;AN=2;DP4=16,13,6,9;MQ=20	GT:PL	0/1:88,0,144
Ref_Crab_Transcript_23738_709	252	C	T	68	DP=12;VDB=0.525142;SGB=-0.662043;RPB=0.707404;MQB=1;MQSB=0.95494;BQB=0.652235;MQ0F=0;ICB=1;HOB=0.5;AC=1;AN=2;DP4=3,0,4,5;MQ=20	GT:PL	0/1:102,0,18
Ref_Crab_Transcript_23738_709	257	A	G	61	DP=12;VDB=0.21899;SGB=-0.651104;RPB=0.829029;MQB=1;MQSB=0.964642;BQB=0.774755;MQ0F=0;ICB=1;HOB=0.5;AC=1;AN=2;DP4=3,0,4,4;MQ=20	GT:PL	0/1:94,0,20
Ref_Crab_Transcript_23746_572	362	T	C	86	DP=13;VDB=0.896471;SGB=-0.676189;RPB=0.772727;MQB=1;MQSB=0.961166;BQB=1;MQ0F=0;ICB=-;HOB=-;AC=2;AN=2;DP4=1,1,6,5;MQ=20	GT:PL	1/1:113,0,1
Ref_Crab_Transcript_23753_432	224	C	T	55	DP=14;VDB=0.878874;SGB=-0.651104;RPB=1;MQB=1;MQSB=1;BQB=0.135054;MQ0F=0;ICB=1;HOB=0.5;AC=1;AN=2;DP4=4,2,4,4;MQ=20	GT:PL	0/1:88,0,61
Ref_Crab_Transcript_23766_1287	1151	G	A	67	DP=11;VDB=0.662733;SGB=-0.662043;RPB=0.333333;MQB=1;MQSB=0.950952;BQB=0.888889;MQ0F=0;ICB=1;HOB=0.5;AC=1;AN=2;DP4=1,1,5,4;MQ=20	GT:PL	0/1:99,0,7
Ref_Crab_Transcript_23767_773	73	A	G	53	DP=10;VDB=0.29154;SGB=-0.651104;RPB=0.375;MQB=1;MQSB=1;BQB=0.8125;MQ0F=0;ICB=1;HOB=0.5;AC=1;AN=2;DP4=2,0,6,2;MQ=20	GT:PL	0/1:85,0,8
Ref_Crab_Transcript_23770_491	382	A	G	39.228	DP=11;VDB=0.510343;SGB=-0.616816;RPB=0.279932;MQB=1.00775;MQSB=0.916482;BQB=0.895781;MQ0F=0;ICB=1;HOB=0.5;AC=1;AN=2;DP4=1,3,2,4;MQ=20	GT:PL	0/1:72,0,43
Ref_Crab_Transcript_23806_451	271	T	C	48.1227	DP=44;VDB=0.179491;SGB=-0.689466;RPB=0.986752;MQB=1;MQSB=1;BQB=0.977452;MQ0F=0;ICB=1;HOB=0.5;AC=1;AN=2;DP4=15,12,12,4;MQ=20	GT:PL	0/1:81,0,140
Ref_Crab_Transcript_23811_1099	628	C	A	57	DP=63;VDB=0.00773382;SGB=-0.692717;RPB=0.486096;MQB=1;MQSB=1;BQB=0.58599;MQ0F=0;ICB=1;HOB=0.5;AC=1;AN=2;DP4=24,13,17,6;MQ=20	GT:PL	0/1:90,0,135
Ref_Crab_Transcript_23821_358	66	T	A	82	DP=32;VDB=0.271954;SGB=-0.690438;RPB=0.651821;MQB=1;MQSB=1;BQB=0.156524;MQ0F=0;ICB=1;HOB=0.5;AC=1;AN=2;DP4=8,7,11,6;MQ=20	GT:PL	0/1:115,0,112
Ref_Crab_Transcript_23887_1432	360	C	A	86	DP=88;VDB=0.0100966;SGB=-0.693136;RPB=0.237117;MQB=1;MQSB=1;BQB=0.99996;MQ0F=0;ICB=1;HOB=0.5;AC=1;AN=2;DP4=30,20,19,16;MQ=20	GT:PL	0/1:119,0,139
Ref_Crab_Transcript_23898_1100	854	T	C	41.2276	DP=10;VDB=0.118204;SGB=-0.616816;RPB=0.895781;MQB=1.00775;MQSB=0.952347;BQB=0.727822;MQ0F=0;ICB=1;HOB=0.5;AC=1;AN=2;DP4=2,2,3,3;MQ=20	GT:PL	0/1:74,0,45
Ref_Crab_Transcript_23902_1115	310	C	T	97	DP=31;VDB=0.983438;SGB=-0.69168;RPB=0.281453;MQB=1;MQSB=1;BQB=0.844698;MQ0F=0;ICB=1;HOB=0.5;AC=1;AN=2;DP4=9,2,10,9;MQ=20	GT:PL	0/1:130,0,66
Ref_Crab_Transcript_23922_1265	838	C	G	68	DP=12;VDB=0.729265;SGB=-0.662043;RPB=0.432745;MQB=1;MQSB=0.982603;BQB=0.596251;MQ0F=0;ICB=1;HOB=0.5;AC=1;AN=2;DP4=2,1,4,5;MQ=20	GT:PL	0/1:102,0,22
Ref_Crab_Transcript_23943_857	137	T	C	79	DP=11;VDB=0.397591;SGB=-0.662043;RPB=1;MQB=1;MQSB=0.916482;BQB=1;MQ0F=0;ICB=-;HOB=-;AC=2;AN=2;DP4=1,0,6,3;MQ=20	GT:PL	1/1:106,10,0
Ref_Crab_Transcript_23947_1124	270	G	A	30.3185	DP=21;VDB=0.0421576;SGB=-0.662043;RPB=0.158673;MQB=1;MQSB=1;BQB=0.0175904;MQ0F=0;ICB=1;HOB=0.5;AC=1;AN=2;DP4=8,4,8,1;MQ=20	GT:PL	0/1:63,0,103
Ref_Crab_Transcript_23947_1124	450	C	G	97	DP=173;VDB=0.876977;SGB=-0.693147;RPB=0.141683;MQB=1;MQSB=1;BQB=0.882322;MQ0F=0;ICB=1;HOB=0.5;AC=1;AN=2;DP4=59,36,38,39;MQ=20	GT:PL	0/1:130,0,138
Ref_Crab_Transcript_23952_782	584	C	T	88	DP=80;VDB=0.705483;SGB=-0.693132;RPB=0.823198;MQB=1;MQSB=1;BQB=0.986743;MQ0F=0;ICB=1;HOB=0.5;AC=1;AN=2;DP4=19,26,14,20;MQ=20	GT:PL	0/1:121,0,149
Ref_Crab_Transcript_23962_1030	428	T	C	106	DP=77;VDB=0.746663;SGB=-0.693139;RPB=0.878815;MQB=1;MQSB=1;BQB=0.0589887;MQ0F=0;ICB=1;HOB=0.5;AC=1;AN=2;DP4=14,24,13,23;MQ=20	GT:PL	0/1:139,0,145
Ref_Crab_Transcript_23985_1405	1098	G	A	64	DP=379;VDB=0.26361;SGB=-0.693147;RPB=0.959307;MQB=1;MQSB=1;BQB=0.0097218;MQ0F=0;ICB=1;HOB=0.5;AC=1;AN=2;DP4=133,96,65,76;MQ=20	GT:PL	0/1:97,0,137
Ref_Crab_Transcript_24015_529	178	C	G	70	DP=22;VDB=0.144698;SGB=-0.676189;RPB=0.72044;MQB=1;MQSB=1;BQB=0.175325;MQ0F=0;ICB=1;HOB=0.5;AC=1;AN=2;DP4=8,2,5,6;MQ=20	GT:PL	0/1:103,0,78
Ref_Crab_Transcript_24015_529	345	C	T	36.6695	DP=48;VDB=0.96562;SGB=-0.688148;RPB=0.751291;MQB=1;MQSB=1;BQB=0.626198;MQ0F=0;ICB=1;HOB=0.5;AC=1;AN=2;DP4=10,23,5,10;MQ=20	GT:PL	0/1:70,0,146
Ref_Crab_Transcript_24017_1318	559	T	G	49.227	DP=25;VDB=0.963746;SGB=-0.670168;RPB=0.44315;MQB=1;MQSB=1;BQB=0.557106;MQ0F=0;ICB=1;HOB=0.5;AC=1;AN=2;DP4=6,9,6,4;MQ=20	GT:PL	0/1:82,0,124
Ref_Crab_Transcript_24039_1376	1031	C	A	50	DP=25;VDB=0.665828;SGB=-0.670168;RPB=0.89609;MQB=1;MQSB=1;BQB=0.403791;MQ0F=0;ICB=1;HOB=0.5;AC=1;AN=2;DP4=5,9,3,7;MQ=20	GT:PL	0/1:83,0,118
Ref_Crab_Transcript_24046_3273	278	G	A	45.3369	DP=14;VDB=0.327269;SGB=-0.651104;RPB=0.195278;MQB=1;MQSB=1;BQB=0.84472;MQ0F=0;ICB=1;HOB=0.5;AC=1;AN=2;DP4=4,2,2,6;MQ=20	GT:PL	0/1:78,0,61
Ref_Crab_Transcript_24055_2286	1384	A	G	93	DP=170;VDB=1.20831e-06;SGB=-0.693147;RPB=0.83606;MQB=1;MQSB=1;BQB=0.975497;MQ0F=0;ICB=1;HOB=0.5;AC=1;AN=2;DP4=48,46,30,40;MQ=20	GT:PL	0/1:126,0,143
Ref_Crab_Transcript_24061_754	120	C	T	39.4017	DP=33;VDB=0.0011267;SGB=-0.690438;RPB=0.903596;MQB=1;MQSB=1;BQB=0.00973026;MQ0F=0;ICB=1;HOB=0.5;AC=1;AN=2;DP4=13,3,16,1;MQ=20	GT:PL	0/1:72,0,91
Ref_Crab_Transcript_24061_754	121	T	G	39.4006	DP=33;VDB=0.00106071;SGB=-0.690438;RPB=0.903596;MQB=1;MQSB=1;BQB=0.910806;MQ0F=0;ICB=1;HOB=0.5;AC=1;AN=2;DP4=13,3,16,1;MQ=20	GT:PL	0/1:72,0,91
Ref_Crab_Transcript_24061_754	324	G	A	108	DP=55;VDB=0.00956328;SGB=-0.693136;RPB=0.48302;MQB=1;MQSB=1;BQB=0.765648;MQ0F=0;ICB=1;HOB=0.5;AC=1;AN=2;DP4=4,9,17,18;MQ=20	GT:PL	0/1:142,0,57
Ref_Crab_Transcript_24071_684	103	C	T	66	DP=166;VDB=3.21573e-06;SGB=-0.693147;RPB=0.976668;MQB=1;MQSB=1;BQB=0.830848;MQ0F=0;ICB=1;HOB=0.5;AC=1;AN=2;DP4=51,6,87,15;MQ=20	GT:PL	0/1:99,0,43
Ref_Crab_Transcript_24074_641	470	A	G	67	DP=13;VDB=0.426121;SGB=-0.662043;RPB=0.381255;MQB=1;MQSB=0.961166;BQB=0.826565;MQ0F=0;ICB=1;HOB=0.5;AC=1;AN=2;DP4=2,2,4,5;MQ=20	GT:PL	0/1:100,0,37
Ref_Crab_Transcript_24077_728	148	T	A	61	DP=17;VDB=0.851014;SGB=-0.662043;RPB=0.965592;MQB=1;MQSB=1;BQB=0.571081;MQ0F=0;ICB=1;HOB=0.5;AC=1;AN=2;DP4=2,5,4,5;MQ=20	GT:PL	0/1:94,0,69
Ref_Crab_Transcript_24089_300	100	T	C	47.3893	DP=17;VDB=0.525142;SGB=-0.662043;RPB=1;MQB=1;MQSB=1;BQB=0.998843;MQ0F=0;ICB=1;HOB=0.5;AC=1;AN=2;DP4=4,4,7,2;MQ=20	GT:PL	0/1:80,0,81
Ref_Crab_Transcript_24089_300	104	T	C	49.2413	DP=15;VDB=0.525142;SGB=-0.662043;RPB=0.569783;MQB=1;MQSB=1;BQB=0.810528;MQ0F=0;ICB=1;HOB=0.5;AC=1;AN=2;DP4=2,4,7,2;MQ=20	GT:PL	0/1:82,0,60
Ref_Crab_Transcript_24100_828	656	A	G	114	DP=44;VDB=0.0252769;SGB=-0.69311;RPB=0.99908;MQB=1;MQSB=1;BQB=0.309991;MQ0F=0;ICB=1;HOB=0.5;AC=1;AN=2;DP4=1,10,11,20;MQ=20	GT:PL	0/1:148,0,34
Ref_Crab_Transcript_24101_948	247	A	C	101	DP=119;VDB=0.00038251;SGB=-0.693147;RPB=0.241652;MQB=1;MQSB=1;BQB=0.664649;MQ0F=0;ICB=1;HOB=0.5;AC=1;AN=2;DP4=18,47,16,35;MQ=20	GT:PL	0/1:134,0,153
Ref_Crab_Transcript_24105_376	290	T	C	32.9841	DP=23;VDB=0.0504289;SGB=-0.651104;RPB=0.664757;MQB=1;MQSB=1;BQB=0.509156;MQ0F=0;ICB=1;HOB=0.5;AC=1;AN=2;DP4=4,11,3,5;MQ=20	GT:PL	0/1:66,0,119
Ref_Crab_Transcript_24116_391	196	C	T	54	DP=22;VDB=0.294276;SGB=-0.670168;RPB=0.266945;MQB=1;MQSB=1;BQB=0.851535;MQ0F=0;ICB=1;HOB=0.5;AC=1;AN=2;DP4=8,2,7,3;MQ=20	GT:PL	0/1:87,0,80
Ref_Crab_Transcript_24116_391	198	C	T	55	DP=23;VDB=0.294276;SGB=-0.670168;RPB=0.772706;MQB=1;MQSB=1;BQB=0.337419;MQ0F=0;ICB=1;HOB=0.5;AC=1;AN=2;DP4=9,1,7,3;MQ=20	GT:PL	0/1:88,0,70
Ref_Crab_Transcript_24125_2013	149	G	A	40.3831	DP=15;VDB=0.490789;SGB=-0.636426;RPB=0.985046;MQB=1;MQSB=1;BQB=0.101079;MQ0F=0;ICB=1;HOB=0.5;AC=1;AN=2;DP4=4,4,3,4;MQ=20	GT:PL	0/1:73,0,86
Ref_Crab_Transcript_24154_2220	1137	G	A	56	DP=151;VDB=0.795706;SGB=-0.693147;RPB=0.784375;MQB=1;MQSB=1;BQB=0.583357;MQ0F=0;ICB=1;HOB=0.5;AC=1;AN=2;DP4=47,42,39,16;MQ=20	GT:PL	0/1:89,0,139
Ref_Crab_Transcript_24170_515	180	C	T	38.2279	DP=10;VDB=0.284203;SGB=-0.616816;RPB=0.783809;MQB=1.00775;MQSB=1.00775;BQB=0.783809;MQ0F=0;ICB=1;HOB=0.5;AC=1;AN=2;DP4=2,2,4,2;MQ=20	GT:PL	0/1:71,0,45
Ref_Crab_Transcript_24186_402	263	C	A	31.8347	DP=28;VDB=0.560035;SGB=-0.662043;RPB=0.87512;MQB=1;MQSB=1;BQB=0.957378;MQ0F=0;ICB=1;HOB=0.5;AC=1;AN=2;DP4=15,4,5,4;MQ=20	GT:PL	0/1:65,0,107
Ref_Crab_Transcript_24214_479	130	G	A	80	DP=20;VDB=0.316684;SGB=-0.680642;RPB=0.423112;MQB=1;MQSB=1;BQB=0.964198;MQ0F=0;ICB=1;HOB=0.5;AC=1;AN=2;DP4=6,2,5,7;MQ=20	GT:PL	0/1:113,0,66
Ref_Crab_Transcript_24215_320	268	G	T	50	DP=15;VDB=0.0057371;SGB=-0.662043;RPB=0.984496;MQB=1;MQSB=1;BQB=0.868815;MQ0F=0;ICB=1;HOB=0.5;AC=1;AN=2;DP4=5,1,7,2;MQ=20	GT:PL	0/1:83,0,52
Ref_Crab_Transcript_24225_516	311	G	C	30.0684	DP=19;VDB=0.299782;SGB=-0.651104;RPB=0.0377739;MQB=0.140347;MQSB=0.263597;BQB=0.711124;MQ0F=0;ICB=1;HOB=0.5;AC=1;AN=2;DP4=8,3,1,7;MQ=23	GT:PL	0/1:63,0,148
Ref_Crab_Transcript_24237_1980	1192	C	T	104	DP=65;VDB=0.945347;SGB=-0.693132;RPB=0.77553;MQB=1;MQSB=1;BQB=0.77553;MQ0F=0;ICB=1;HOB=0.5;AC=1;AN=2;DP4=22,8,20,14;MQ=20	GT:PL	0/1:137,0,112
Ref_Crab_Transcript_24246_352	135	C	T	30.9853	DP=23;VDB=0.14143;SGB=-0.651104;RPB=0.567118;MQB=1;MQSB=1;BQB=0.2069;MQ0F=0;ICB=1;HOB=0.5;AC=1;AN=2;DP4=8,7,5,3;MQ=20	GT:PL	0/1:64,0,125
Ref_Crab_Transcript_24246_352	184	G	A	38.3688	DP=12;VDB=0.0568748;SGB=-0.616816;RPB=0.208021;MQB=0.950952;MQSB=0.964642;BQB=0.891517;MQ0F=0;ICB=1;HOB=0.5;AC=1;AN=2;DP4=1,4,3,3;MQ=20	GT:PL	0/1:71,0,53
Ref_Crab_Transcript_24249_1180	507	T	C	33.3803	DP=13;VDB=0.741566;SGB=-0.616816;RPB=0.961166;MQB=0.961166;MQSB=1;BQB=0.245404;MQ0F=0;ICB=1;HOB=0.5;AC=1;AN=2;DP4=6,1,3,3;MQ=20	GT:PL	0/1:66,0,65
Ref_Crab_Transcript_24279_347	186	G	A	95	DP=12;VDB=0.563606;SGB=-0.670168;RPB=1;MQB=1;MQSB=0.950952;BQB=1;MQ0F=0;ICB=-;HOB=-;AC=2;AN=2;DP4=0,1,5,5;MQ=20	GT:PL	1/1:122,13,0
Ref_Crab_Transcript_24311_542	345	T	C	94	DP=10;VDB=0.14143;SGB=-0.651104;RPB=-;MQB=-;MQSB=0.992367;BQB=-;MQ0F=0;ICB=-;HOB=-;AC=2;AN=2;DP4=0,0,4,4;MQ=20	GT:PL	1/1:121,24,0
Ref_Crab_Transcript_24332_904	641	A	G	84	DP=73;VDB=0.66158;SGB=-0.693079;RPB=0.902273;MQB=1;MQSB=1;BQB=0.791881;MQ0F=0;ICB=1;HOB=0.5;AC=1;AN=2;DP4=14,29,13,16;MQ=20	GT:PL	0/1:117,0,152
Ref_Crab_Transcript_24344_302	238	A	T	30.3544	DP=10;VDB=0.332598;SGB=-0.590765;RPB=0.649731;MQB=0.974597;MQSB=0.974597;BQB=0.730948;MQ0F=0;ICB=1;HOB=0.5;AC=1;AN=2;DP4=3,1,2,3;MQ=20	GT:PL	0/1:63,0,45
Ref_Crab_Transcript_24354_407	4	A	G	67	DP=20;VDB=2.8314e-08;SGB=-0.676189;RPB=0.356561;MQB=1;MQSB=1;BQB=0.426445;MQ0F=0;ICB=1;HOB=0.5;AC=1;AN=2;DP4=0,4,7,4;MQ=20	GT:PL	0/1:100,0,25
Ref_Crab_Transcript_24354_407	197	G	A	79	DP=30;VDB=0.888366;SGB=-0.686358;RPB=0.365696;MQB=1;MQSB=1;BQB=0.0799821;MQ0F=0;ICB=1;HOB=0.5;AC=1;AN=2;DP4=3,12,6,8;MQ=20	GT:PL	0/1:112,0,104
Ref_Crab_Transcript_24360_346	245	G	A	93	DP=115;VDB=8.1062e-15;SGB=-0.693147;RPB=0.160548;MQB=1;MQSB=1;BQB=0.961603;MQ0F=0;ICB=1;HOB=0.5;AC=1;AN=2;DP4=3,59,9,42;MQ=20	GT:PL	0/1:126,0,100
Ref_Crab_Transcript_24367_605	196	A	G	113	DP=20;VDB=0.754011;SGB=-0.690438;RPB=0.789232;MQB=1;MQSB=1;BQB=0.933674;MQ0F=0;ICB=-;HOB=-;AC=2;AN=2;DP4=0,3,7,10;MQ=20	GT:PL	1/1:140,5,0
Ref_Crab_Transcript_24394_529	133	C	T	140	DP=34;VDB=0.625639;SGB=-0.693127;RPB=-;MQB=-;MQSB=1;BQB=-;MQ0F=0;ICB=-;HOB=-;AC=2;AN=2;DP4=0,0,25,8;MQ=20	GT:PL	1/1:167,99,0
Ref_Crab_Transcript_24394_529	144	A	G	138	DP=39;VDB=0.672535;SGB=-0.693136;RPB=-;MQB=-;MQSB=1;BQB=-;MQ0F=0;ICB=-;HOB=-;AC=2;AN=2;DP4=0,0,27,8;MQ=20	GT:PL	1/1:165,105,0
Ref_Crab_Transcript_24394_529	154	G	A	145	DP=53;VDB=0.921187;SGB=-0.693147;RPB=-;MQB=-;MQSB=1;BQB=-;MQ0F=0;ICB=-;HOB=-;AC=2;AN=2;DP4=0,0,35,11;MQ=20	GT:PL	1/1:172,138,0
Ref_Crab_Transcript_24394_529	163	A	G	164	DP=56;VDB=0.93823;SGB=-0.693147;RPB=-;MQB=-;MQSB=1;BQB=-;MQ0F=0;ICB=-;HOB=-;AC=2;AN=2;DP4=0,0,36,19;MQ=20	GT:PL	1/1:191,166,0
Ref_Crab_Transcript_24418_303	25	T	C	112	DP=19;VDB=2.47373e-05;SGB=-0.676189;RPB=-;MQB=-;MQSB=0.964642;BQB=-;MQ0F=0;ICB=-;HOB=-;AC=2;AN=2;DP4=0,0,7,4;MQ=20	GT:PL	1/1:139,33,0
Ref_Crab_Transcript_24418_303	26	G	A	53	DP=19;VDB=0.000625496;SGB=-0.662043;RPB=0.096972;MQB=1;MQSB=0.961166;BQB=0.0211283;MQ0F=0;ICB=1;HOB=0.5;AC=1;AN=2;DP4=0,4,7,2;MQ=20	GT:PL	0/1:86,0,27
Ref_Crab_Transcript_24418_303	29	A	C	110	DP=24;VDB=0.000178937;SGB=-0.680642;RPB=1;MQB=1;MQSB=0.961166;BQB=1;MQ0F=0;ICB=-;HOB=-;AC=2;AN=2;DP4=1,0,6,6;MQ=20	GT:PL	1/1:137,19,0
Ref_Crab_Transcript_24418_303	41	A	G	166	DP=26;VDB=7.13544e-06;SGB=-0.692717;RPB=-;MQB=-;MQSB=1;BQB=-;MQ0F=0;ICB=-;HOB=-;AC=2;AN=2;DP4=0,0,10,13;MQ=20	GT:PL	1/1:193,69,0
Ref_Crab_Transcript_24418_303	42	A	G	171	DP=26;VDB=2.20392e-06;SGB=-0.692717;RPB=-;MQB=-;MQSB=1;BQB=-;MQ0F=0;ICB=-;HOB=-;AC=2;AN=2;DP4=0,0,9,14;MQ=20	GT:PL	1/1:198,69,0
Ref_Crab_Transcript_24418_303	47	C	T	177	DP=28;VDB=9.81093e-06;SGB=-0.692976;RPB=-;MQB=-;MQSB=1;BQB=-;MQ0F=0;ICB=-;HOB=-;AC=2;AN=2;DP4=0,0,10,16;MQ=20	GT:PL	1/1:204,78,0
Ref_Crab_Transcript_24418_303	71	G	A	171	DP=40;VDB=0.0276178;SGB=-0.693143;RPB=-;MQB=-;MQSB=1;BQB=-;MQ0F=0;ICB=-;HOB=-;AC=2;AN=2;DP4=0,0,21,17;MQ=20	GT:PL	1/1:198,114,0
Ref_Crab_Transcript_24425_711	403	C	G	35.3693	DP=11;VDB=0.355086;SGB=-0.616816;RPB=0.891517;MQB=0.950952;MQSB=0.950952;BQB=0.208021;MQ0F=0;ICB=1;HOB=0.5;AC=1;AN=2;DP4=2,3,4,2;MQ=20	GT:PL	0/1:68,0,57
Ref_Crab_Transcript_24429_621	109	T	G	58	DP=43;VDB=0.00117883;SGB=-0.692717;RPB=0.805858;MQB=1;MQSB=1;BQB=0.0690258;MQ0F=0;ICB=1;HOB=0.5;AC=1;AN=2;DP4=17,2,20,3;MQ=20	GT:PL	0/1:91,0,76
Ref_Crab_Transcript_24429_621	121	G	A	69	DP=53;VDB=0.0468329;SGB=-0.692976;RPB=0.573105;MQB=1;MQSB=1;BQB=0.11004;MQ0F=0;ICB=1;HOB=0.5;AC=1;AN=2;DP4=21,4,21,5;MQ=20	GT:PL	0/1:102,0,94
Ref_Crab_Transcript_24458_785	659	G	A	118	DP=75;VDB=0.0134118;SGB=-0.693146;RPB=0.599949;MQB=1;MQSB=1;BQB=0.551602;MQ0F=0;ICB=1;HOB=0.5;AC=1;AN=2;DP4=8,22,16,26;MQ=20	GT:PL	0/1:151,0,119
Ref_Crab_Transcript_24459_417	245	C	T	51	DP=10;VDB=0.946037;SGB=-0.636426;RPB=0.916482;MQB=0.916482;MQSB=1.00775;BQB=0.733186;MQ0F=0;ICB=1;HOB=0.5;AC=1;AN=2;DP4=2,1,4,3;MQ=20	GT:PL	0/1:84,0,28
Ref_Crab_Transcript_24467_332	234	C	T	72	DP=16;VDB=0.0257451;SGB=-0.670168;RPB=0.0497871;MQB=1;MQSB=1;BQB=0.544711;MQ0F=0;ICB=1;HOB=0.5;AC=1;AN=2;DP4=3,2,4,6;MQ=20	GT:PL	0/1:105,0,46
Ref_Crab_Transcript_24470_437	24	G	A	91	DP=20;VDB=1.8693e-05;SGB=-0.683931;RPB=0.805456;MQB=0.870697;MQSB=0.803979;BQB=0.049027;MQ0F=0;ICB=1;HOB=0.5;AC=1;AN=2;DP4=3,3,8,5;MQ=20	GT:PL	0/1:124,0,50
Ref_Crab_Transcript_24470_437	325	T	C	80	DP=55;VDB=0.0428214;SGB=-0.693146;RPB=0.0220988;MQB=1;MQSB=1;BQB=0.153108;MQ0F=0;ICB=1;HOB=0.5;AC=1;AN=2;DP4=5,5,29,15;MQ=20	GT:PL	0/1:112,0,9
Ref_Crab_Transcript_24470_437	337	G	A	107	DP=54;VDB=0.0255313;SGB=-0.693143;RPB=0.0693617;MQB=1;MQSB=1;BQB=0.913833;MQ0F=0;ICB=1;HOB=0.5;AC=1;AN=2;DP4=10,5,21,17;MQ=20	GT:PL	0/1:141,0,59
Ref_Crab_Transcript_24470_437	360	G	A	83	DP=44;VDB=0.000134228;SGB=-0.693139;RPB=0.194173;MQB=1;MQSB=1;BQB=0.99815;MQ0F=0;ICB=1;HOB=0.5;AC=1;AN=2;DP4=5,3,25,11;MQ=20	GT:PL	0/1:115,0,8
Ref_Crab_Transcript_24470_437	373	T	C	80	DP=36;VDB=0.000697976;SGB=-0.693054;RPB=0.297797;MQB=1;MQSB=1;BQB=0.940104;MQ0F=0;ICB=-;HOB=-;AC=2;AN=2;DP4=1,4,22,6;MQ=20	GT:PL	1/1:107,7,0
Ref_Crab_Transcript_24470_437	375	C	A	47.3963	DP=35;VDB=4.59699e-07;SGB=-0.689466;RPB=0.0300492;MQB=1;MQSB=1;BQB=0.411399;MQ0F=0;ICB=1;HOB=0.5;AC=1;AN=2;DP4=9,8,14,2;MQ=20	GT:PL	0/1:80,0,122
Ref_Crab_Transcript_24470_437	380	C	A	46.4079	DP=31;VDB=0.00128851;SGB=-0.686358;RPB=0.0279673;MQB=1;MQSB=1;BQB=0.928296;MQ0F=0;ICB=1;HOB=0.5;AC=1;AN=2;DP4=7,5,11,3;MQ=20	GT:PL	0/1:79,0,96
Ref_Crab_Transcript_24470_437	397	A	G	63	DP=15;VDB=0.000184352;SGB=-0.670168;RPB=0.0189207;MQB=1;MQSB=1;BQB=0.508203;MQ0F=0;ICB=1;HOB=0.5;AC=1;AN=2;DP4=3,2,7,3;MQ=20	GT:PL	0/1:96,0,46
Ref_Crab_Transcript_24470_437	411	G	A	43.0862	DP=11;VDB=0.0175817;SGB=-0.556411;RPB=-;MQB=-;MQSB=1;BQB=-;MQ0F=0;ICB=-;HOB=-;AC=2;AN=2;DP4=0,0,1,3;MQ=20	GT:PL	1/1:70,12,0
Ref_Crab_Transcript_24473_308	99	C	T	81	DP=41;VDB=0.475741;SGB=-0.691153;RPB=0.358821;MQB=1;MQSB=1;BQB=0.826494;MQ0F=0;ICB=1;HOB=0.5;AC=1;AN=2;DP4=7,16,9,9;MQ=20	GT:PL	0/1:114,0,135
Ref_Crab_Transcript_24501_383	272	A	G	54	DP=13;VDB=0.847599;SGB=-0.651104;RPB=0.635922;MQB=1;MQSB=0.961166;BQB=0.958048;MQ0F=0;ICB=1;HOB=0.5;AC=1;AN=2;DP4=2,3,5,3;MQ=20	GT:PL	0/1:87,0,52
Ref_Crab_Transcript_24519_615	207	A	G	30.3542	DP=11;VDB=0.644504;SGB=-0.590765;RPB=0.649731;MQB=0.974597;MQSB=0.974597;BQB=0.487298;MQ0F=0;ICB=1;HOB=0.5;AC=1;AN=2;DP4=2,2,2,3;MQ=20	GT:PL	0/1:63,0,48
Ref_Crab_Transcript_24572_1039	755	A	T	40.3788	DP=13;VDB=0.402545;SGB=-0.636426;RPB=0.531709;MQB=0.961166;MQSB=1;BQB=0.777113;MQ0F=0;ICB=1;HOB=0.5;AC=1;AN=2;DP4=3,3,5,2;MQ=20	GT:PL	0/1:73,0,66
Ref_Crab_Transcript_24573_951	358	G	A	48.282	DP=12;VDB=0.453474;SGB=-0.636426;RPB=0.896474;MQB=0.95494;MQSB=0.982603;BQB=0.896474;MQ0F=0;ICB=1;HOB=0.5;AC=1;AN=2;DP4=3,2,3,4;MQ=20	GT:PL	0/1:81,0,54
Ref_Crab_Transcript_24574_637	171	A	G	33.3803	DP=14;VDB=0.258434;SGB=-0.616816;RPB=0.899815;MQB=0.961166;MQSB=1;BQB=0.31698;MQ0F=0;ICB=1;HOB=0.5;AC=1;AN=2;DP4=5,2,3,3;MQ=20	GT:PL	0/1:66,0,73
Ref_Crab_Transcript_24645_787	259	A	G	57	DP=13;VDB=0.00286929;SGB=-0.651104;RPB=0.0137638;MQB=1;MQSB=0.961166;BQB=0.306895;MQ0F=0;ICB=1;HOB=0.5;AC=1;AN=2;DP4=3,2,4,4;MQ=20	GT:PL	0/1:90,0,47
Ref_Crab_Transcript_24645_787	329	C	A	42.1668	DP=13;VDB=0.00600627;SGB=-0.651104;RPB=1;MQB=1;MQSB=1;BQB=0.84246;MQ0F=0;ICB=1;HOB=0.5;AC=1;AN=2;DP4=2,3,1,7;MQ=20	GT:PL	0/1:75,0,52
Ref_Crab_Transcript_24645_787	342	A	G	37.6578	DP=14;VDB=0.00653337;SGB=-0.651104;RPB=0.263597;MQB=1;MQSB=1;BQB=0.532481;MQ0F=0;ICB=1;HOB=0.5;AC=1;AN=2;DP4=0,3,1,7;MQ=20	GT:PL	0/1:71,0,20
Ref_Crab_Transcript_24669_1908	1048	A	T	73	DP=89;VDB=0.418039;SGB=-0.69312;RPB=0.999915;MQB=1;MQSB=1;BQB=0.552926;MQ0F=0;ICB=1;HOB=0.5;AC=1;AN=2;DP4=42,14,12,20;MQ=20	GT:PL	0/1:106,0,120
Ref_Crab_Transcript_24709_779	401	G	T	47.2827	DP=12;VDB=0.656385;SGB=-0.636426;RPB=0.40926;MQB=0.95494;MQSB=1;BQB=0.6821;MQ0F=0;ICB=1;HOB=0.5;AC=1;AN=2;DP4=0,5,4,3;MQ=20	GT:PL	0/1:80,0,42
Ref_Crab_Transcript_24710_852	379	G	A	71	DP=42;VDB=0.210319;SGB=-0.691153;RPB=0.961671;MQB=1;MQSB=1;BQB=0.997097;MQ0F=0;ICB=1;HOB=0.5;AC=1;AN=2;DP4=11,13,12,6;MQ=20	GT:PL	0/1:104,0,139
Ref_Crab_Transcript_24710_852	562	T	C	71	DP=33;VDB=0.202461;SGB=-0.692976;RPB=0.0342098;MQB=1;MQSB=1;BQB=0.971095;MQ0F=0;ICB=1;HOB=0.5;AC=1;AN=2;DP4=2,5,3,23;MQ=20	GT:PL	0/1:105,0,26
Ref_Crab_Transcript_24726_451	3	C	G	36.0763	DP=13;VDB=0.000481013;SGB=-0.616816;RPB=-;MQB=-;MQSB=-;BQB=-;MQ0F=0;ICB=-;HOB=-;AC=2;AN=2;DP4=0,0,6,0;MQ=20	GT:PL	1/1:65,17,2
Ref_Crab_Transcript_24743_311	155	T	A	44.6826	DP=71;VDB=0.0277893;SGB=-0.692352;RPB=0.682688;MQB=1;MQSB=1;BQB=0.471724;MQ0F=0;ICB=1;HOB=0.5;AC=1;AN=2;DP4=19,29,11,10;MQ=20	GT:PL	0/1:78,0,147
Ref_Crab_Transcript_24753_415	155	G	T	48.4882	DP=11;VDB=0.424295;SGB=-0.651104;RPB=0.309786;MQB=1;MQSB=1;BQB=0.124514;MQ0F=0;ICB=1;HOB=0.5;AC=1;AN=2;DP4=2,1,6,2;MQ=20	GT:PL	0/1:82,0,25
Ref_Crab_Transcript_24756_651	516	G	A	58	DP=12;VDB=0.755557;SGB=-0.651104;RPB=0.493254;MQB=1;MQSB=0.95494;BQB=1;MQ0F=0;ICB=1;HOB=0.5;AC=1;AN=2;DP4=2,2,3,5;MQ=20	GT:PL	0/1:91,0,39
Ref_Crab_Transcript_24769_328	1	T	G	38.0679	DP=21;VDB=1.63308e-11;SGB=-0.689466;RPB=0.902014;MQB=1;MQSB=1;BQB=0.587035;MQ0F=0;ICB=1;HOB=0.5;AC=1;AN=2;DP4=1,4,12,4;MQ=20	GT:PL	0/1:74,3,40
Ref_Crab_Transcript_24769_328	3	T	A	38.4081	DP=42;VDB=1.65834e-11;SGB=-0.689466;RPB=0.924849;MQB=1;MQSB=1;BQB=0.449329;MQ0F=0;ICB=1;HOB=0.5;AC=1;AN=2;DP4=2,8,14,2;MQ=20	GT:PL	0/1:71,0,76
Ref_Crab_Transcript_24772_365	159	A	G	31.3177	DP=14;VDB=0.40105;SGB=-0.616816;RPB=0.967216;MQB=1;MQSB=1;BQB=0.703221;MQ0F=0;ICB=1;HOB=0.5;AC=1;AN=2;DP4=3,5,3,3;MQ=20	GT:PL	0/1:64,0,87
Ref_Crab_Transcript_24828_569	230	A	T	54	DP=21;VDB=0.465515;SGB=-0.670168;RPB=0.214203;MQB=1;MQSB=1;BQB=0.0962474;MQ0F=0;ICB=1;HOB=0.5;AC=1;AN=2;DP4=4,5,7,3;MQ=20	GT:PL	0/1:87,0,88
Ref_Crab_Transcript_24830_729	477	C	A	83	DP=23;VDB=0.746499;SGB=-0.686358;RPB=0.828064;MQB=1;MQSB=1;BQB=0.412436;MQ0F=0;ICB=1;HOB=0.5;AC=1;AN=2;DP4=1,7,8,6;MQ=20	GT:PL	0/1:116,0,54
Ref_Crab_Transcript_24830_729	491	C	T	64	DP=21;VDB=0.758178;SGB=-0.676189;RPB=0.853271;MQB=1;MQSB=1;BQB=0.19945;MQ0F=0;ICB=1;HOB=0.5;AC=1;AN=2;DP4=1,9,3,8;MQ=20	GT:PL	0/1:97,0,73
Ref_Crab_Transcript_24842_427	356	C	T	57	DP=25;VDB=0.122277;SGB=-0.676189;RPB=0.248086;MQB=1;MQSB=1;BQB=0.947483;MQ0F=0;ICB=1;HOB=0.5;AC=1;AN=2;DP4=8,6,7,4;MQ=20	GT:PL	0/1:90,0,116
Ref_Crab_Transcript_24842_427	372	G	C	65	DP=21;VDB=0.0662348;SGB=-0.676189;RPB=0.428034;MQB=1;MQSB=1;BQB=0.961107;MQ0F=0;ICB=1;HOB=0.5;AC=1;AN=2;DP4=5,5,7,4;MQ=20	GT:PL	0/1:98,0,93
Ref_Crab_Transcript_24852_430	206	A	G	53	DP=34;VDB=0.750182;SGB=-0.680642;RPB=0.179809;MQB=1;MQSB=1;BQB=0.455714;MQ0F=0;ICB=1;HOB=0.5;AC=1;AN=2;DP4=6,15,5,7;MQ=20	GT:PL	0/1:86,0,135
Ref_Crab_Transcript_24887_750	294	C	T	38.2275	DP=31;VDB=0.00525213;SGB=-0.680642;RPB=0.957043;MQB=1;MQSB=1;BQB=0.150159;MQ0F=0;ICB=1;HOB=0.5;AC=1;AN=2;DP4=14,4,10,2;MQ=20	GT:PL	0/1:71,0,106
Ref_Crab_Transcript_24887_750	296	C	A	40.2735	DP=32;VDB=0.00525213;SGB=-0.680642;RPB=0.99902;MQB=1;MQSB=1;BQB=0.980343;MQ0F=0;ICB=1;HOB=0.5;AC=1;AN=2;DP4=13,4,10,2;MQ=20	GT:PL	0/1:73,0,106
Ref_Crab_Transcript_24903_2578	2409	T	G	36.4051	DP=13;VDB=0.0769344;SGB=-0.616816;RPB=0.372712;MQB=0.982603;MQSB=0.982603;BQB=0.660716;MQ0F=0;ICB=1;HOB=0.5;AC=1;AN=2;DP4=3,3,3,3;MQ=20	GT:PL	0/1:69,0,69
Ref_Crab_Transcript_24923_1368	866	C	T	48.2986	DP=23;VDB=0.73483;SGB=-0.670168;RPB=0.233558;MQB=1;MQSB=1;BQB=0.246123;MQ0F=0;ICB=1;HOB=0.5;AC=1;AN=2;DP4=6,7,5,5;MQ=20	GT:PL	0/1:81,0,113
Ref_Crab_Transcript_24926_956	76	A	C	40.3789	DP=13;VDB=0.62127;SGB=-0.636426;RPB=0.920266;MQB=0.961166;MQSB=1;BQB=0.961166;MQ0F=0;ICB=1;HOB=0.5;AC=1;AN=2;DP4=6,0,5,2;MQ=20	GT:PL	0/1:73,0,48
Ref_Crab_Transcript_24946_393	152	C	T	57	DP=13;VDB=0.0946644;SGB=-0.651104;RPB=0.958048;MQB=1;MQSB=0.961166;BQB=0.306895;MQ0F=0;ICB=1;HOB=0.5;AC=1;AN=2;DP4=3,2,4,4;MQ=20	GT:PL	0/1:90,0,51
Ref_Crab_Transcript_24955_596	367	T	C	82	DP=15;VDB=0.216658;SGB=-0.680642;RPB=0.997399;MQB=1;MQSB=1;BQB=0.997399;MQ0F=0;ICB=1;HOB=0.5;AC=1;AN=2;DP4=1,2,4,8;MQ=20	GT:PL	0/1:116,0,13
Ref_Crab_Transcript_24972_1475	416	G	A	52	DP=52;VDB=0.238467;SGB=-0.690438;RPB=0.873761;MQB=1;MQSB=1;BQB=0.661478;MQ0F=0;ICB=1;HOB=0.5;AC=1;AN=2;DP4=18,16,10,7;MQ=20	GT:PL	0/1:85,0,146
Ref_Crab_Transcript_24976_1261	174	A	T	56	DP=16;VDB=0.0510515;SGB=-0.651104;RPB=0.958048;MQB=1;MQSB=0.961166;BQB=0.723173;MQ0F=0;ICB=1;HOB=0.5;AC=1;AN=2;DP4=4,1,3,5;MQ=20	GT:PL	0/1:89,0,47
Ref_Crab_Transcript_24976_1261	192	G	T	47.3113	DP=21;VDB=0.509555;SGB=-0.662043;RPB=0.776837;MQB=1;MQSB=1;BQB=1;MQ0F=0;ICB=1;HOB=0.5;AC=1;AN=2;DP4=5,7,3,6;MQ=20	GT:PL	0/1:80,0,111
Ref_Crab_Transcript_24976_1261	261	T	C	76	DP=11;VDB=0.44307;SGB=-0.651104;RPB=1;MQB=1;MQSB=0.924584;BQB=1;MQ0F=0;ICB=-;HOB=-;AC=2;AN=2;DP4=0,1,3,5;MQ=20	GT:PL	1/1:103,7,0
Ref_Crab_Transcript_24985_400	261	A	G	45.3504	DP=18;VDB=0.195133;SGB=-0.651104;RPB=0.86753;MQB=1;MQSB=1;BQB=0.952795;MQ0F=0;ICB=1;HOB=0.5;AC=1;AN=2;DP4=6,4,3,5;MQ=20	GT:PL	0/1:78,0,97
Ref_Crab_Transcript_24985_400	269	G	A	59	DP=17;VDB=0.560035;SGB=-0.662043;RPB=0.981652;MQB=1;MQSB=1;BQB=0.797039;MQ0F=0;ICB=1;HOB=0.5;AC=1;AN=2;DP4=5,3,4,5;MQ=20	GT:PL	0/1:92,0,79
Ref_Crab_Transcript_24991_573	159	C	T	168	DP=31;VDB=0.570689;SGB=-0.693097;RPB=1;MQB=1;MQSB=1;BQB=1;MQ0F=0;ICB=-;HOB=-;AC=2;AN=2;DP4=1,0,14,16;MQ=20	GT:PL	1/1:195,73,0
Ref_Crab_Transcript_24991_573	169	G	A	165	DP=27;VDB=0.161206;SGB=-0.692976;RPB=1;MQB=1;MQSB=1;BQB=1;MQ0F=0;ICB=-;HOB=-;AC=2;AN=2;DP4=1,0,11,15;MQ=20	GT:PL	1/1:192,61,0
Ref_Crab_Transcript_24993_585	78	G	C	64	DP=21;VDB=0.00195366;SGB=-0.689466;RPB=0.0205469;MQB=1;MQSB=1;BQB=0.972484;MQ0F=0;ICB=1;HOB=0.5;AC=1;AN=2;DP4=3,1,13,3;MQ=20	GT:PL	0/1:98,0,14
Ref_Crab_Transcript_25006_877	220	T	C	67	DP=52;VDB=9.65176e-08;SGB=-0.693146;RPB=0.684071;MQB=1;MQSB=1;BQB=0.606531;MQ0F=0;ICB=-;HOB=-;AC=2;AN=2;DP4=6,1,36,6;MQ=20	GT:PL	1/1:94,27,0
Ref_Crab_Transcript_25009_712	606	C	T	36.2278	DP=20;VDB=0.696057;SGB=-0.651104;RPB=0.581345;MQB=1;MQSB=1;BQB=0.581345;MQ0F=0;ICB=1;HOB=0.5;AC=1;AN=2;DP4=3,9,2,6;MQ=20	GT:PL	0/1:69,0,104
Ref_Crab_Transcript_25015_738	596	A	G	34.9293	DP=10;VDB=0.822449;SGB=-0.616816;RPB=0.346719;MQB=0.924584;MQSB=1;BQB=0.577865;MQ0F=0;ICB=1;HOB=0.5;AC=1;AN=2;DP4=0,3,1,5;MQ=20	GT:PL	0/1:68,0,26
Ref_Crab_Transcript_25045_1221	1129	C	T	87	DP=11;VDB=0.00446273;SGB=-0.676189;RPB=-;MQB=-;MQSB=1;BQB=-;MQ0F=0;ICB=-;HOB=-;AC=2;AN=2;DP4=0,0,1,10;MQ=20	GT:PL	1/1:114,33,0
Ref_Crab_Transcript_25052_394	72	C	T	50	DP=11;VDB=0.414968;SGB=-0.651104;RPB=0.829029;MQB=1;MQSB=1;BQB=0.829029;MQ0F=0;ICB=1;HOB=0.5;AC=1;AN=2;DP4=2,1,6,2;MQ=20	GT:PL	0/1:84,0,25
Ref_Crab_Transcript_25052_394	75	C	T	49.4639	DP=11;VDB=0.414968;SGB=-0.651104;RPB=0.829029;MQB=1;MQSB=1;BQB=1;MQ0F=0;ICB=1;HOB=0.5;AC=1;AN=2;DP4=2,1,6,2;MQ=20	GT:PL	0/1:83,0,25
Ref_Crab_Transcript_25098_764	633	T	C	39.2168	DP=12;VDB=0.551573;SGB=-0.616816;RPB=0.335918;MQB=1.00775;MQSB=1.00775;BQB=0.335918;MQ0F=0;ICB=1;HOB=0.5;AC=1;AN=2;DP4=2,2,2,4;MQ=20	GT:PL	0/1:72,0,44
Ref_Crab_Transcript_25116_452	181	T	G	40.452	DP=12;VDB=0.421959;SGB=-0.651104;RPB=0.472367;MQB=1;MQSB=1;BQB=0.954207;MQ0F=0;ICB=1;HOB=0.5;AC=1;AN=2;DP4=1,2,7,1;MQ=20	GT:PL	0/1:74,0,25
Ref_Crab_Transcript_25116_452	241	G	A	43.4044	DP=14;VDB=0.525314;SGB=-0.636426;RPB=0.777382;MQB=0.966012;MQSB=1;BQB=0.948864;MQ0F=0;ICB=1;HOB=0.5;AC=1;AN=2;DP4=6,1,4,3;MQ=20	GT:PL	0/1:76,0,63
Ref_Crab_Transcript_25116_452	290	T	C	51	DP=24;VDB=0.594064;SGB=-0.670168;RPB=0.870352;MQB=1;MQSB=1;BQB=0.469541;MQ0F=0;ICB=1;HOB=0.5;AC=1;AN=2;DP4=7,7,6,4;MQ=20	GT:PL	0/1:84,0,120
Ref_Crab_Transcript_25116_452	311	T	C	42.2991	DP=23;VDB=0.0623279;SGB=-0.662043;RPB=0.705248;MQB=1;MQSB=1;BQB=0.850154;MQ0F=0;ICB=1;HOB=0.5;AC=1;AN=2;DP4=4,7,4,5;MQ=20	GT:PL	0/1:75,0,103
Ref_Crab_Transcript_25126_331	99	A	G	46.2044	DP=34;VDB=0.310283;SGB=-0.683931;RPB=0.598522;MQB=1;MQSB=1;BQB=0.983175;MQ0F=0;ICB=1;HOB=0.5;AC=1;AN=2;DP4=15,5,10,3;MQ=20	GT:PL	0/1:79,0,113
Ref_Crab_Transcript_25168_471	326	T	C	65	DP=13;VDB=0.268796;SGB=-0.662043;RPB=0.898672;MQB=1;MQSB=1;BQB=0.811069;MQ0F=0;ICB=1;HOB=0.5;AC=1;AN=2;DP4=1,2,3,6;MQ=20	GT:PL	0/1:99,0,22
Ref_Crab_Transcript_25169_436	136	C	G	53	DP=10;VDB=0.405339;SGB=-0.636426;RPB=0.5;MQB=1;MQSB=0.924584;BQB=0.785714;MQ0F=0;ICB=1;HOB=0.5;AC=1;AN=2;DP4=2,0,4,3;MQ=20	GT:PL	0/1:86,0,11
Ref_Crab_Transcript_25222_314	254	G	C	111	DP=44;VDB=0.000128497;SGB=-0.693127;RPB=0.997421;MQB=1;MQSB=1;BQB=0.994951;MQ0F=0;ICB=1;HOB=0.5;AC=1;AN=2;DP4=2,8,10,23;MQ=20	GT:PL	0/1:145,0,31
Ref_Crab_Transcript_25223_802	515	G	C	44.4044	DP=14;VDB=0.301201;SGB=-0.636426;RPB=0.194346;MQB=0.966012;MQSB=1;BQB=0.925999;MQ0F=0;ICB=1;HOB=0.5;AC=1;AN=2;DP4=5,2,3,4;MQ=20	GT:PL	0/1:77,0,71
Ref_Crab_Transcript_25239_324	252	T	C	73	DP=14;VDB=0.0478483;SGB=-0.670168;RPB=0.105399;MQB=1;MQSB=1;BQB=0.236928;MQ0F=0;ICB=1;HOB=0.5;AC=1;AN=2;DP4=1,3,4,6;MQ=20	GT:PL	0/1:107,0,28
Ref_Crab_Transcript_25257_922	3	A	T	32.0218	DP=48;VDB=1.84999e-15;SGB=-0.693079;RPB=0.552791;MQB=1;MQSB=1;BQB=0.167265;MQ0F=0;ICB=1;HOB=0.5;AC=1;AN=2;DP4=7,5,27,2;MQ=20	GT:PL	0/1:65,0,74
Ref_Crab_Transcript_25276_911	204	C	T	50	DP=15;VDB=0.646494;SGB=-0.651104;RPB=0.753577;MQB=1;MQSB=1;BQB=0.0891522;MQ0F=0;ICB=1;HOB=0.5;AC=1;AN=2;DP4=4,3,5,3;MQ=20	GT:PL	0/1:83,0,73
Ref_Crab_Transcript_25283_2068	1855	C	G	112	DP=137;VDB=0.00266556;SGB=-0.693147;RPB=0.646516;MQB=1;MQSB=1;BQB=0.593758;MQ0F=0;ICB=1;HOB=0.5;AC=1;AN=2;DP4=33,33,31,39;MQ=20	GT:PL	0/1:145,0,137
Ref_Crab_Transcript_25283_2068	1869	A	G	114	DP=131;VDB=0.0196137;SGB=-0.693147;RPB=0.591278;MQB=1;MQSB=1;BQB=0.470685;MQ0F=0;ICB=1;HOB=0.5;AC=1;AN=2;DP4=27,32,27,37;MQ=20	GT:PL	0/1:147,0,139
Ref_Crab_Transcript_25283_2068	1875	A	G	112	DP=121;VDB=0.0193521;SGB=-0.693147;RPB=0.990623;MQB=1;MQSB=1;BQB=0.0504727;MQ0F=0;ICB=1;HOB=0.5;AC=1;AN=2;DP4=26,34,22,36;MQ=20	GT:PL	0/1:145,0,144
Ref_Crab_Transcript_25283_2068	1885	T	C	110	DP=120;VDB=0.809414;SGB=-0.693147;RPB=0.63326;MQB=1;MQSB=1;BQB=0.204181;MQ0F=0;ICB=1;HOB=0.5;AC=1;AN=2;DP4=25,36,19,38;MQ=20	GT:PL	0/1:143,0,147
Ref_Crab_Transcript_25288_715	109	C	T	50	DP=10;VDB=0.052315;SGB=-0.651104;RPB=0.625;MQB=1;MQSB=0.916482;BQB=0.8125;MQ0F=0;ICB=1;HOB=0.5;AC=1;AN=2;DP4=1,1,6,2;MQ=20	GT:PL	0/1:83,0,10
Ref_Crab_Transcript_25288_715	115	T	C	52	DP=10;VDB=0.052315;SGB=-0.651104;RPB=0.625;MQB=1;MQSB=0.916482;BQB=0.9375;MQ0F=0;ICB=1;HOB=0.5;AC=1;AN=2;DP4=1,1,6,2;MQ=20	GT:PL	0/1:85,0,10
Ref_Crab_Transcript_25288_715	124	C	A	52	DP=10;VDB=0.0407425;SGB=-0.651104;RPB=0.625;MQB=1;MQSB=0.916482;BQB=0.9375;MQ0F=0;ICB=1;HOB=0.5;AC=1;AN=2;DP4=1,1,6,2;MQ=20	GT:PL	0/1:85,0,10
Ref_Crab_Transcript_25290_687	677	G	A	95	DP=44;VDB=4.12866e-13;SGB=-0.693079;RPB=0.963591;MQB=1;MQSB=1;BQB=0.313702;MQ0F=0;ICB=1;HOB=0.5;AC=1;AN=2;DP4=1,14,5,24;MQ=20	GT:PL	0/1:128,0,55
Ref_Crab_Transcript_25292_341	94	G	A	66	DP=17;VDB=0.984591;SGB=-0.670168;RPB=0.490777;MQB=1;MQSB=1;BQB=0.809155;MQ0F=0;ICB=1;HOB=0.5;AC=1;AN=2;DP4=3,3,4,6;MQ=20	GT:PL	0/1:99,0,58
Ref_Crab_Transcript_25292_341	107	T	A	30.3822	DP=13;VDB=0.0794599;SGB=-0.616816;RPB=0.695312;MQB=0.961166;MQSB=1;BQB=0.31698;MQ0F=0;ICB=1;HOB=0.5;AC=1;AN=2;DP4=4,3,4,2;MQ=20	GT:PL	0/1:63,0,78
Ref_Crab_Transcript_25292_341	108	G	A	30.3868	DP=13;VDB=0.0794599;SGB=-0.616816;RPB=0.695312;MQB=0.961166;MQSB=1;BQB=0.194278;MQ0F=0;ICB=1;HOB=0.5;AC=1;AN=2;DP4=4,3,4,2;MQ=20	GT:PL	0/1:63,0,77
Ref_Crab_Transcript_25312_373	156	T	C	59	DP=11;VDB=0.0946644;SGB=-0.651104;RPB=0.716531;MQB=1;MQSB=0.964642;BQB=0.774755;MQ0F=0;ICB=1;HOB=0.5;AC=1;AN=2;DP4=1,2,3,5;MQ=20	GT:PL	0/1:93,0,25
Ref_Crab_Transcript_25312_373	157	G	C	59	DP=11;VDB=0.0946644;SGB=-0.651104;RPB=0.716531;MQB=1;MQSB=0.964642;BQB=0.920044;MQ0F=0;ICB=1;HOB=0.5;AC=1;AN=2;DP4=1,2,3,5;MQ=20	GT:PL	0/1:93,0,25
Ref_Crab_Transcript_25312_373	158	C	T	58	DP=11;VDB=0.0946644;SGB=-0.651104;RPB=0.716531;MQB=1;MQSB=0.964642;BQB=0.472367;MQ0F=0;ICB=1;HOB=0.5;AC=1;AN=2;DP4=1,2,3,5;MQ=20	GT:PL	0/1:92,0,25
Ref_Crab_Transcript_25312_373	165	A	G	92	DP=11;VDB=0.117011;SGB=-0.670168;RPB=1;MQB=1;MQSB=0.964642;BQB=1;MQ0F=0;ICB=-;HOB=-;AC=2;AN=2;DP4=1,0,3,7;MQ=20	GT:PL	1/1:119,13,0
Ref_Crab_Transcript_25312_373	166	T	C	59	DP=12;VDB=0.0946644;SGB=-0.651104;RPB=0.716531;MQB=1;MQSB=0.964642;BQB=0.655816;MQ0F=0;ICB=1;HOB=0.5;AC=1;AN=2;DP4=1,2,3,5;MQ=20	GT:PL	0/1:93,0,25
Ref_Crab_Transcript_25316_385	227	C	T	31.6894	DP=34;VDB=0.0504901;SGB=-0.670168;RPB=0.918888;MQB=1;MQSB=1;BQB=0.746954;MQ0F=0;ICB=1;HOB=0.5;AC=1;AN=2;DP4=6,17,4,6;MQ=20	GT:PL	0/1:65,0,134
Ref_Crab_Transcript_25329_520	490	A	G	47.8685	DP=122;VDB=1.72726e-08;SGB=-0.693144;RPB=0.162003;MQB=1;MQSB=1;BQB=0.904074;MQ0F=0;ICB=1;HOB=0.5;AC=1;AN=2;DP4=42,37,22,17;MQ=20	GT:PL	0/1:81,0,131
Ref_Crab_Transcript_25343_1007	101	G	A	53	DP=27;VDB=0.246406;SGB=-0.680642;RPB=0.84246;MQB=1;MQSB=1;BQB=0.708895;MQ0F=0;ICB=1;HOB=0.5;AC=1;AN=2;DP4=8,7,9,3;MQ=20	GT:PL	0/1:86,0,120
Ref_Crab_Transcript_25359_542	229	C	T	84	DP=5919;VDB=0.975907;SGB=-0.693147;RPB=0.159485;MQB=1;MQSB=1;BQB=3.88966e-08;MQ0F=0;ICB=1;HOB=0.5;AC=1;AN=2;DP4=1850,1525,1304,1126;MQ=20	GT:PL	0/1:117,0,156
Ref_Crab_Transcript_25366_734	500	C	T	50	DP=12;VDB=0.930257;SGB=-0.636426;RPB=0.964642;MQB=0.964642;MQSB=0.950952;BQB=0.803868;MQ0F=0;ICB=1;HOB=0.5;AC=1;AN=2;DP4=2,2,3,4;MQ=20	GT:PL	0/1:83,0,42
Ref_Crab_Transcript_25369_343	199	A	G	53	DP=23;VDB=0.244899;SGB=-0.676189;RPB=0.934091;MQB=1;MQSB=1;BQB=0.953755;MQ0F=0;ICB=1;HOB=0.5;AC=1;AN=2;DP4=5,7,2,9;MQ=20	GT:PL	0/1:86,0,107
Ref_Crab_Transcript_25369_343	214	A	G	50	DP=13;VDB=0.00947686;SGB=-0.636426;RPB=0.361741;MQB=0.964642;MQSB=0.964642;BQB=0.241161;MQ0F=0;ICB=1;HOB=0.5;AC=1;AN=2;DP4=1,3,3,4;MQ=20	GT:PL	0/1:83,0,40
Ref_Crab_Transcript_25375_697	372	G	A	56	DP=11;VDB=0.981064;SGB=-0.651104;RPB=0.716531;MQB=1;MQSB=0.950952;BQB=0.877913;MQ0F=0;ICB=1;HOB=0.5;AC=1;AN=2;DP4=1,2,4,4;MQ=20	GT:PL	0/1:89,0,25
Ref_Crab_Transcript_25413_458	259	T	A	43.3571	DP=19;VDB=0.254481;SGB=-0.662043;RPB=0.868634;MQB=1;MQSB=1;BQB=0.999167;MQ0F=0;ICB=1;HOB=0.5;AC=1;AN=2;DP4=2,8,4,5;MQ=20	GT:PL	0/1:76,0,85
Ref_Crab_Transcript_25417_663	159	G	T	50	DP=368;VDB=0.143531;SGB=-0.693147;RPB=0.970935;MQB=1;MQSB=1;BQB=0.635966;MQ0F=0;ICB=1;HOB=0.5;AC=1;AN=2;DP4=102,121,53,71;MQ=20	GT:PL	0/1:83,0,138
Ref_Crab_Transcript_25479_349	142	T	C	39.5988	DP=11;VDB=0.0178597;SGB=-0.651104;RPB=0.877913;MQB=1;MQSB=1;BQB=0.221971;MQ0F=0;ICB=1;HOB=0.5;AC=1;AN=2;DP4=3,0,7,1;MQ=20	GT:PL	0/1:73,0,20
Ref_Crab_Transcript_25483_745	148	T	C	91	DP=31;VDB=0.126824;SGB=-0.689466;RPB=0.984733;MQB=1;MQSB=1;BQB=0.693763;MQ0F=0;ICB=1;HOB=0.5;AC=1;AN=2;DP4=8,5,6,10;MQ=20	GT:PL	0/1:124,0,99
Ref_Crab_Transcript_25487_668	501	G	A	83	DP=26;VDB=0.0790377;SGB=-0.688148;RPB=0.978682;MQB=1;MQSB=1;BQB=0.907278;MQ0F=0;ICB=1;HOB=0.5;AC=1;AN=2;DP4=5,6,7,8;MQ=20	GT:PL	0/1:116,0,90
Ref_Crab_Transcript_25487_668	526	T	C	76	DP=18;VDB=1.78146e-06;SGB=-0.676189;RPB=0.0368832;MQB=1;MQSB=1;BQB=0.0368832;MQ0F=0;ICB=1;HOB=0.5;AC=1;AN=2;DP4=3,0,5,6;MQ=20	GT:PL	0/1:109,0,12
Ref_Crab_Transcript_25488_590	490	C	T	31.5257	DP=101;VDB=0.712152;SGB=-0.693054;RPB=0.581081;MQB=1;MQSB=1;BQB=0.789195;MQ0F=0;ICB=1;HOB=0.5;AC=1;AN=2;DP4=31,39,13,15;MQ=20	GT:PL	0/1:65,0,132
Ref_Crab_Transcript_25488_590	515	A	T	96	DP=82;VDB=6.74787e-07;SGB=-0.693139;RPB=0.562042;MQB=1;MQSB=1;BQB=0.00896796;MQ0F=0;ICB=1;HOB=0.5;AC=1;AN=2;DP4=14,30,17,19;MQ=20	GT:PL	0/1:129,0,149
Ref_Crab_Transcript_25499_318	113	C	T	63	DP=11;VDB=0.279378;SGB=-0.651104;RPB=0;MQB=1;MQSB=1.00775;BQB=0;MQ0F=0;ICB=1;HOB=0.5;AC=1;AN=2;DP4=2,0,4,4;MQ=20	GT:PL	0/1:95,0,8
Ref_Crab_Transcript_25514_350	202	C	T	54	DP=20;VDB=0.0152419;SGB=-0.670168;RPB=0.040501;MQB=1;MQSB=1;BQB=0.988636;MQ0F=0;ICB=1;HOB=0.5;AC=1;AN=2;DP4=3,7,7,3;MQ=20	GT:PL	0/1:87,0,91
Ref_Crab_Transcript_25514_350	204	A	G	48.3977	DP=20;VDB=0.0152419;SGB=-0.670168;RPB=0.040501;MQB=1;MQSB=1;BQB=0.594096;MQ0F=0;ICB=1;HOB=0.5;AC=1;AN=2;DP4=3,7,7,3;MQ=20	GT:PL	0/1:81,0,91
Ref_Crab_Transcript_25514_350	260	C	T	78	DP=16;VDB=0.227606;SGB=-0.676189;RPB=0.129046;MQB=1;MQSB=1;BQB=0.991513;MQ0F=0;ICB=1;HOB=0.5;AC=1;AN=2;DP4=2,2,5,6;MQ=20	GT:PL	0/1:112,0,31
Ref_Crab_Transcript_25527_388	184	C	T	32.4063	DP=13;VDB=0.766069;SGB=-0.616816;RPB=0.931779;MQB=0.982603;MQSB=1;BQB=0.47436;MQ0F=0;ICB=1;HOB=0.5;AC=1;AN=2;DP4=0,6,2,4;MQ=20	GT:PL	0/1:65,0,50
Ref_Crab_Transcript_25527_388	188	C	T	56	DP=13;VDB=0.861228;SGB=-0.651104;RPB=0.41985;MQB=1;MQSB=1;BQB=0.0897512;MQ0F=0;ICB=1;HOB=0.5;AC=1;AN=2;DP4=0,5,3,5;MQ=20	GT:PL	0/1:89,0,39
Ref_Crab_Transcript_25530_309	199	C	A	98	DP=23;VDB=0.527988;SGB=-0.689466;RPB=0.980111;MQB=1;MQSB=1;BQB=0.23423;MQ0F=0;ICB=1;HOB=0.5;AC=1;AN=2;DP4=5,2,8,8;MQ=20	GT:PL	0/1:131,0,49
Ref_Crab_Transcript_25530_309	219	T	C	99	DP=31;VDB=0.938759;SGB=-0.692352;RPB=0.999108;MQB=1;MQSB=1;BQB=1;MQ0F=0;ICB=1;HOB=0.5;AC=1;AN=2;DP4=6,4,13,8;MQ=20	GT:PL	0/1:132,0,67
Ref_Crab_Transcript_25530_309	251	T	C	38.2275	DP=20;VDB=0.116387;SGB=-0.651104;RPB=0.511891;MQB=1;MQSB=1;BQB=0.913904;MQ0F=0;ICB=1;HOB=0.5;AC=1;AN=2;DP4=5,7,5,3;MQ=20	GT:PL	0/1:71,0,113
Ref_Crab_Transcript_25539_459	194	A	G	68	DP=12;VDB=0.1044;SGB=-0.662043;RPB=0.652235;MQB=1;MQSB=0.95494;BQB=0.933909;MQ0F=0;ICB=1;HOB=0.5;AC=1;AN=2;DP4=1,2,4,5;MQ=20	GT:PL	0/1:102,0,22
Ref_Crab_Transcript_25546_489	16	G	A	42.6051	DP=132;VDB=1.70333e-31;SGB=-0.693147;RPB=0.416069;MQB=1;MQSB=1;BQB=0.0697788;MQ0F=0;ICB=1;HOB=0.5;AC=1;AN=2;DP4=38,0,68,6;MQ=20	GT:PL	0/1:75,0,13
Ref_Crab_Transcript_25550_754	1	T	G	71	DP=82;VDB=1.4013e-45;SGB=-0.693147;RPB=0.999853;MQB=1;MQSB=1;BQB=0.965985;MQ0F=0;ICB=1;HOB=0.5;AC=1;AN=2;DP4=5,12,12,53;MQ=20	GT:PL	0/1:105,0,40
Ref_Crab_Transcript_25562_379	128	T	C	58	DP=12;VDB=0.123545;SGB=-0.651104;RPB=0.94394;MQB=1;MQSB=0.982603;BQB=0.493254;MQ0F=0;ICB=1;HOB=0.5;AC=1;AN=2;DP4=3,1,3,5;MQ=20	GT:PL	0/1:91,0,37
Ref_Crab_Transcript_25600_490	208	C	T	37.3605	DP=13;VDB=0.469001;SGB=-0.616816;RPB=0.475476;MQB=0.950952;MQSB=0.964642;BQB=0.683497;MQ0F=0;ICB=1;HOB=0.5;AC=1;AN=2;DP4=2,3,2,4;MQ=20	GT:PL	0/1:70,0,55
Ref_Crab_Transcript_25604_559	432	C	T	40.452	DP=11;VDB=0.516656;SGB=-0.651104;RPB=0.829029;MQB=1;MQSB=1;BQB=0.309786;MQ0F=0;ICB=1;HOB=0.5;AC=1;AN=2;DP4=2,1,7,1;MQ=20	GT:PL	0/1:74,0,25
Ref_Crab_Transcript_25625_3242	1858	C	T	34.8273	DP=7579;VDB=0.909211;SGB=-0.693147;RPB=0.0288173;MQB=1;MQSB=1;BQB=0.254064;MQ0F=0;ICB=1;HOB=0.5;AC=1;AN=2;DP4=3008,1931,1467,895;MQ=20	GT:PL	0/1:68,0,132
Ref_Crab_Transcript_25625_3242	2182	C	T	68	DP=7918;VDB=0.99977;SGB=-0.693147;RPB=0.119506;MQB=1;MQSB=1;BQB=4.0935e-09;MQ0F=0;ICB=1;HOB=0.5;AC=1;AN=2;DP4=2506,2397,1533,1309;MQ=20	GT:PL	0/1:101,0,140
Ref_Crab_Transcript_25626_855	848	T	A	42.5346	DP=44;VDB=3.45393e-07;SGB=-0.680642;RPB=0.031048;MQB=1;MQSB=1;BQB=0.637628;MQ0F=0;ICB=1;HOB=0.5;AC=1;AN=2;DP4=2,3,1,11;MQ=20	GT:PL	0/1:76,0,29
Ref_Crab_Transcript_25641_926	357	T	C	36.4051	DP=13;VDB=0.387746;SGB=-0.616816;RPB=0.660716;MQB=0.982603;MQSB=0.982603;BQB=0.864013;MQ0F=0;ICB=1;HOB=0.5;AC=1;AN=2;DP4=3,3,3,3;MQ=20	GT:PL	0/1:69,0,69
Ref_Crab_Transcript_25660_701	132	T	G	114	DP=53;VDB=0.50652;SGB=-0.693097;RPB=0.929359;MQB=1;MQSB=1;BQB=0.964739;MQ0F=0;ICB=1;HOB=0.5;AC=1;AN=2;DP4=9,12,10,20;MQ=20	GT:PL	0/1:147,0,116
Ref_Crab_Transcript_25663_663	255	C	T	53	DP=15;VDB=0.984834;SGB=-0.651104;RPB=0.941512;MQB=1;MQSB=1;BQB=0.720273;MQ0F=0;ICB=1;HOB=0.5;AC=1;AN=2;DP4=3,4,4,4;MQ=20	GT:PL	0/1:86,0,74
Ref_Crab_Transcript_25666_379	210	C	T	43.4044	DP=15;VDB=0.93404;SGB=-0.636426;RPB=0.948864;MQB=0.966012;MQSB=0.966012;BQB=0.240074;MQ0F=0;ICB=1;HOB=0.5;AC=1;AN=2;DP4=3,4,4,3;MQ=20	GT:PL	0/1:76,0,77
Ref_Crab_Transcript_25666_379	223	G	A	46.3785	DP=13;VDB=0.0119151;SGB=-0.636426;RPB=0.961166;MQB=0.961166;MQSB=1;BQB=0.470358;MQ0F=0;ICB=1;HOB=0.5;AC=1;AN=2;DP4=2,4,3,4;MQ=20	GT:PL	0/1:79,0,65
Ref_Crab_Transcript_25666_379	226	C	T	48.282	DP=13;VDB=0.0119151;SGB=-0.636426;RPB=0.838008;MQB=0.95494;MQSB=0.95494;BQB=0.253351;MQ0F=0;ICB=1;HOB=0.5;AC=1;AN=2;DP4=2,3,3,4;MQ=20	GT:PL	0/1:81,0,55
Ref_Crab_Transcript_25666_379	240	T	C	44.4041	DP=14;VDB=0.0544391;SGB=-0.636426;RPB=0.966012;MQB=0.966012;MQSB=1;BQB=0.966012;MQ0F=0;ICB=1;HOB=0.5;AC=1;AN=2;DP4=2,5,3,4;MQ=20	GT:PL	0/1:77,0,72
Ref_Crab_Transcript_25672_1137	541	A	G	65	DP=10;VDB=0.999967;SGB=-0.662043;RPB=1;MQB=1;MQSB=1;BQB=1;MQ0F=0;ICB=-;HOB=-;AC=2;AN=2;DP4=0,1,1,8;MQ=20	GT:PL	1/1:92,10,0
Ref_Crab_Transcript_25685_940	6	T	A	36.0772	DP=13;VDB=0.00402178;SGB=-0.590765;RPB=-;MQB=-;MQSB=1;BQB=-;MQ0F=0;ICB=-;HOB=-;AC=2;AN=2;DP4=0,0,4,1;MQ=20	GT:PL	1/1:68,17,5
Ref_Crab_Transcript_25691_698	421	C	T	53	DP=36;VDB=0.0131444;SGB=-0.689466;RPB=0.426621;MQB=1;MQSB=1;BQB=0.808185;MQ0F=0;ICB=1;HOB=0.5;AC=1;AN=2;DP4=4,16,2,14;MQ=20	GT:PL	0/1:86,0,118
Ref_Crab_Transcript_25700_423	343	C	G	58	DP=12;VDB=0.195133;SGB=-0.651104;RPB=0.5;MQB=1;MQSB=1;BQB=0.25;MQ0F=0;ICB=1;HOB=0.5;AC=1;AN=2;DP4=0,2,2,6;MQ=20	GT:PL	0/1:90,0,8
Ref_Crab_Transcript_25706_300	218	C	T	32.3808	DP=13;VDB=0.168702;SGB=-0.616816;RPB=0.777113;MQB=0.961166;MQSB=1;BQB=0.828239;MQ0F=0;ICB=1;HOB=0.5;AC=1;AN=2;DP4=3,4,2,4;MQ=20	GT:PL	0/1:65,0,79
Ref_Crab_Transcript_25707_428	217	A	T	56	DP=23;VDB=0.237602;SGB=-0.670168;RPB=0.361567;MQB=1;MQSB=1;BQB=0.943487;MQ0F=0;ICB=1;HOB=0.5;AC=1;AN=2;DP4=5,8,5,5;MQ=20	GT:PL	0/1:89,0,114
Ref_Crab_Transcript_25709_1246	680	G	A	84	DP=11;VDB=0.865097;SGB=-0.670168;RPB=1;MQB=1;MQSB=0.964642;BQB=1;MQ0F=0;ICB=-;HOB=-;AC=2;AN=2;DP4=0,1,7,3;MQ=20	GT:PL	1/1:111,13,0
Ref_Crab_Transcript_25725_377	255	A	G	63	DP=13;VDB=0.259208;SGB=-0.662043;RPB=0.995736;MQB=1;MQSB=1;BQB=0.983051;MQ0F=0;ICB=1;HOB=0.5;AC=1;AN=2;DP4=1,2,3,6;MQ=20	GT:PL	0/1:97,0,22
Ref_Crab_Transcript_25732_2110	1	T	G	80	DP=25;VDB=1.30483e-15;SGB=-0.692831;RPB=1;MQB=1;MQSB=1;BQB=1;MQ0F=0;ICB=-;HOB=-;AC=2;AN=2;DP4=0,1,22,2;MQ=20	GT:PL	1/1:107,52,0
Ref_Crab_Transcript_25738_2695	592	A	G	93	DP=67;VDB=2.107e-13;SGB=-0.693097;RPB=1.40608e-05;MQB=1;MQSB=1;BQB=0.000189555;MQ0F=0;ICB=1;HOB=0.5;AC=1;AN=2;DP4=8,9,21,9;MQ=20	GT:PL	0/1:126,0,96
Ref_Crab_Transcript_25742_1112	845	C	A	52	DP=27;VDB=0.175884;SGB=-0.676189;RPB=0.839185;MQB=1;MQSB=1;BQB=0.885367;MQ0F=0;ICB=1;HOB=0.5;AC=1;AN=2;DP4=7,9,7,4;MQ=20	GT:PL	0/1:85,0,127
Ref_Crab_Transcript_25755_502	245	A	G	53	DP=16;VDB=0.421959;SGB=-0.651104;RPB=0.985046;MQB=1;MQSB=1;BQB=0.921243;MQ0F=0;ICB=1;HOB=0.5;AC=1;AN=2;DP4=3,4,4,4;MQ=20	GT:PL	0/1:86,0,74
Ref_Crab_Transcript_25756_425	99	A	T	54	DP=10;VDB=0.821768;SGB=-0.636426;RPB=0.857143;MQB=1;MQSB=0.924584;BQB=0.142857;MQ0F=0;ICB=1;HOB=0.5;AC=1;AN=2;DP4=0,2,3,4;MQ=20	GT:PL	0/1:87,0,11
Ref_Crab_Transcript_25783_1541	103	C	T	52	DP=55;VDB=5.59994e-08;SGB=-0.69311;RPB=0.714147;MQB=1;MQSB=1;BQB=0.982761;MQ0F=0;ICB=1;HOB=0.5;AC=1;AN=2;DP4=19,2,28,3;MQ=20	GT:PL	0/1:85,0,67
Ref_Crab_Transcript_25783_1541	156	G	A	54	DP=126;VDB=0.707833;SGB=-0.693147;RPB=0.62499;MQB=1;MQSB=1;BQB=0.452751;MQ0F=0;ICB=1;HOB=0.5;AC=1;AN=2;DP4=55,22,36,12;MQ=20	GT:PL	0/1:87,0,123
Ref_Crab_Transcript_25783_1541	183	G	A	34.8645	DP=135;VDB=0.0402513;SGB=-0.693144;RPB=0.219938;MQB=1;MQSB=1;BQB=0.317463;MQ0F=0;ICB=1;HOB=0.5;AC=1;AN=2;DP4=43,35,28,11;MQ=20	GT:PL	0/1:68,0,130
Ref_Crab_Transcript_25783_1541	186	G	C	48.851	DP=119;VDB=0.403632;SGB=-0.693143;RPB=0.74004;MQB=1;MQSB=1;BQB=0.980357;MQ0F=0;ICB=1;HOB=0.5;AC=1;AN=2;DP4=44,33,17,21;MQ=20	GT:PL	0/1:82,0,124
Ref_Crab_Transcript_25783_1541	231	G	A	92	DP=132;VDB=0.725375;SGB=-0.693147;RPB=0.99766;MQB=1;MQSB=1;BQB=0.749014;MQ0F=0;ICB=1;HOB=0.5;AC=1;AN=2;DP4=39,35,18,35;MQ=20	GT:PL	0/1:125,0,142
Ref_Crab_Transcript_25783_1541	391	A	G	116	DP=134;VDB=0.00189704;SGB=-0.693147;RPB=0.0130706;MQB=1;MQSB=1;BQB=0.0337931;MQ0F=0;ICB=1;HOB=0.5;AC=1;AN=2;DP4=26,24,28,45;MQ=20	GT:PL	0/1:149,0,117
Ref_Crab_Transcript_25783_1541	402	G	A	91	DP=131;VDB=0.00462169;SGB=-0.693147;RPB=0.995584;MQB=1;MQSB=1;BQB=0.0291944;MQ0F=0;ICB=1;HOB=0.5;AC=1;AN=2;DP4=32,42,24,30;MQ=20	GT:PL	0/1:124,0,149
Ref_Crab_Transcript_25783_1541	410	G	A	86	DP=128;VDB=2.92091e-05;SGB=-0.693147;RPB=0.155404;MQB=1;MQSB=1;BQB=0.69948;MQ0F=0;ICB=1;HOB=0.5;AC=1;AN=2;DP4=33,40,24,27;MQ=20	GT:PL	0/1:119,0,146
Ref_Crab_Transcript_25783_1541	473	A	G	61	DP=85;VDB=0.786791;SGB=-0.693079;RPB=0.48521;MQB=1;MQSB=1;BQB=0.548505;MQ0F=0;ICB=1;HOB=0.5;AC=1;AN=2;DP4=15,38,7,22;MQ=20	GT:PL	0/1:94,0,149
Ref_Crab_Transcript_25783_1541	549	C	G	44.3931	DP=30;VDB=0.333755;SGB=-0.651104;RPB=0.959011;MQB=1;MQSB=1;BQB=0.412466;MQ0F=0;ICB=1;HOB=0.5;AC=1;AN=2;DP4=3,4,2,6;MQ=20	GT:PL	0/1:77,0,74
Ref_Crab_Transcript_25783_1541	574	A	C	74	DP=207;VDB=1.25076e-11;SGB=-0.69312;RPB=0.000176382;MQB=1;MQSB=1;BQB=0.153184;MQ0F=0;ICB=1;HOB=0.5;AC=1;AN=2;DP4=6,3,24,8;MQ=20	GT:PL	0/1:108,0,25
Ref_Crab_Transcript_25783_1541	575	A	C	59	DP=227;VDB=4.6285e-10;SGB=-0.693097;RPB=0.00206325;MQB=1;MQSB=1;BQB=0.0956344;MQ0F=0;ICB=1;HOB=0.5;AC=1;AN=2;DP4=6,3,25,5;MQ=20	GT:PL	0/1:93,0,30
Ref_Crab_Transcript_25783_1541	579	G	A	33.9983	DP=327;VDB=4.13091e-36;SGB=-0.693147;RPB=0.00122712;MQB=1;MQSB=1;BQB=5.59647e-13;MQ0F=0;ICB=1;HOB=0.5;AC=1;AN=2;DP4=83,27,40,21;MQ=20	GT:PL	0/1:67,0,111
Ref_Crab_Transcript_25783_1541	638	G	A	99	DP=1584;VDB=8.79995e-09;SGB=-0.693147;RPB=0.185023;MQB=1;MQSB=1;BQB=0.00173285;MQ0F=0;ICB=1;HOB=0.5;AC=1;AN=2;DP4=493,315,381,363;MQ=20	GT:PL	0/1:132,0,149
Ref_Crab_Transcript_25790_301	148	C	T	44.0753	DP=11;VDB=0.898965;SGB=-0.636426;RPB=0.924449;MQB=0.964642;MQSB=1;BQB=0.643095;MQ0F=0;ICB=1;HOB=0.5;AC=1;AN=2;DP4=4,0,5,2;MQ=20	GT:PL	0/1:77,0,33
Ref_Crab_Transcript_25790_301	159	A	C	44.0753	DP=11;VDB=0.898965;SGB=-0.636426;RPB=0.924449;MQB=0.964642;MQSB=1;BQB=0.924449;MQ0F=0;ICB=1;HOB=0.5;AC=1;AN=2;DP4=4,0,5,2;MQ=20	GT:PL	0/1:77,0,33
Ref_Crab_Transcript_25796_317	125	C	T	47.282	DP=12;VDB=0.496546;SGB=-0.636426;RPB=0.896474;MQB=0.95494;MQSB=0.95494;BQB=0.760054;MQ0F=0;ICB=1;HOB=0.5;AC=1;AN=2;DP4=3,2,4,3;MQ=20	GT:PL	0/1:80,0,54
Ref_Crab_Transcript_25808_400	89	T	A	33.8862	DP=27;VDB=0.0033764;SGB=-0.662043;RPB=0.163516;MQB=1;MQSB=1;BQB=0.0866596;MQ0F=0;ICB=1;HOB=0.5;AC=1;AN=2;DP4=10,8,5,4;MQ=20	GT:PL	0/1:67,0,132
Ref_Crab_Transcript_25823_1045	1	A	C	43.2873	DP=13;VDB=1.82474e-05;SGB=-0.651104;RPB=0.989343;MQB=1;MQSB=1;BQB=0.187475;MQ0F=0;ICB=1;HOB=0.5;AC=1;AN=2;DP4=0,5,2,6;MQ=20	GT:PL	0/1:76,0,40
Ref_Crab_Transcript_25823_1045	2	G	T	38.3854	DP=20;VDB=7.99767e-05;SGB=-0.636426;RPB=0.941512;MQB=1;MQSB=1;BQB=0.993326;MQ0F=0;ICB=1;HOB=0.5;AC=1;AN=2;DP4=1,7,2,5;MQ=20	GT:PL	0/1:71,0,72
Ref_Crab_Transcript_25824_503	218	A	T	38.1513	DP=21;VDB=0.382733;SGB=-0.651104;RPB=0.249764;MQB=1;MQSB=1;BQB=0.8274;MQ0F=0;ICB=1;HOB=0.5;AC=1;AN=2;DP4=8,5,3,5;MQ=20	GT:PL	0/1:71,0,113
Ref_Crab_Transcript_25832_873	752	A	G	101	DP=10;VDB=0.821672;SGB=-0.670168;RPB=-;MQB=-;MQSB=1.00775;BQB=-;MQ0F=0;ICB=-;HOB=-;AC=2;AN=2;DP4=0,0,6,4;MQ=20	GT:PL	1/1:128,30,0
Ref_Crab_Transcript_25832_873	757	C	T	107	DP=10;VDB=0.821672;SGB=-0.670168;RPB=-;MQB=-;MQSB=1.00775;BQB=-;MQ0F=0;ICB=-;HOB=-;AC=2;AN=2;DP4=0,0,6,4;MQ=20	GT:PL	1/1:134,30,0
Ref_Crab_Transcript_25838_666	256	G	T	31.3712	DP=14;VDB=0.00324086;SGB=-0.616816;RPB=0.683497;MQB=0.950952;MQSB=0.950952;BQB=0.356607;MQ0F=0;ICB=1;HOB=0.5;AC=1;AN=2;DP4=4,1,1,5;MQ=20	GT:PL	0/1:64,0,52
Ref_Crab_Transcript_25839_487	291	C	T	33.2062	DP=21;VDB=0.0113307;SGB=-0.651104;RPB=0.720273;MQB=1;MQSB=1;BQB=0.3611;MQ0F=0;ICB=1;HOB=0.5;AC=1;AN=2;DP4=3,9,2,6;MQ=20	GT:PL	0/1:66,0,104
Ref_Crab_Transcript_25840_1773	737	T	C	49.7785	DP=105;VDB=0.104438;SGB=-0.69312;RPB=0.768163;MQB=1;MQSB=1;BQB=0.901165;MQ0F=0;ICB=1;HOB=0.5;AC=1;AN=2;DP4=37,32,13,19;MQ=20	GT:PL	0/1:83,0,132
Ref_Crab_Transcript_25885_765	163	T	C	59	DP=106;VDB=0.109442;SGB=-0.693139;RPB=0.848254;MQB=1;MQSB=1;BQB=0.279047;MQ0F=0;ICB=1;HOB=0.5;AC=1;AN=2;DP4=34,36,17,19;MQ=20	GT:PL	0/1:92,0,138
Ref_Crab_Transcript_25905_1020	752	C	T	38.2283	DP=10;VDB=0.105075;SGB=-0.616816;RPB=0.895781;MQB=1.00775;MQSB=0.916482;BQB=0.335918;MQ0F=0;ICB=1;HOB=0.5;AC=1;AN=2;DP4=3,1,4,2;MQ=20	GT:PL	0/1:71,0,42
Ref_Crab_Transcript_25914_426	155	G	T	46.3148	DP=14;VDB=0.257744;SGB=-0.651104;RPB=0.218985;MQB=1;MQSB=1;BQB=0.301194;MQ0F=0;ICB=1;HOB=0.5;AC=1;AN=2;DP4=5,1,6,2;MQ=20	GT:PL	0/1:79,0,55
Ref_Crab_Transcript_25926_549	281	C	T	47.1666	DP=26;VDB=0.340495;SGB=-0.670168;RPB=0.464398;MQB=1;MQSB=1;BQB=0.832202;MQ0F=0;ICB=1;HOB=0.5;AC=1;AN=2;DP4=5,11,6,4;MQ=20	GT:PL	0/1:80,0,124
Ref_Crab_Transcript_25937_1283	778	G	A	38.1184	DP=28;VDB=0.175096;SGB=-0.662043;RPB=0.248136;MQB=1;MQSB=1;BQB=0.865888;MQ0F=0;ICB=1;HOB=0.5;AC=1;AN=2;DP4=12,3,6,3;MQ=20	GT:PL	0/1:71,0,99
Ref_Crab_Transcript_25944_314	209	G	C	58	DP=22;VDB=0.110348;SGB=-0.670168;RPB=0.65306;MQB=1;MQSB=1;BQB=0.786884;MQ0F=0;ICB=1;HOB=0.5;AC=1;AN=2;DP4=10,2,4,6;MQ=20	GT:PL	0/1:91,0,85
Ref_Crab_Transcript_25944_314	254	T	C	43.2947	DP=19;VDB=0.00425545;SGB=-0.651104;RPB=0.0339567;MQB=1;MQSB=1;BQB=0.41781;MQ0F=0;ICB=1;HOB=0.5;AC=1;AN=2;DP4=9,2,3,5;MQ=20	GT:PL	0/1:76,0,86
Ref_Crab_Transcript_25953_1234	382	G	A	41.2276	DP=10;VDB=0.374572;SGB=-0.616816;RPB=0.503877;MQB=1.00775;MQSB=0.952347;BQB=0.895781;MQ0F=0;ICB=1;HOB=0.5;AC=1;AN=2;DP4=2,2,3,3;MQ=20	GT:PL	0/1:74,0,45
Ref_Crab_Transcript_25958_1204	1	T	A	53	DP=14;VDB=2.78366e-08;SGB=-0.680642;RPB=0.583333;MQB=1;MQSB=1;BQB=0.916667;MQ0F=0;ICB=1;HOB=0.5;AC=1;AN=2;DP4=1,1,7,5;MQ=20	GT:PL	0/1:109,27,34
Ref_Crab_Transcript_25985_655	511	A	G	97	DP=31;VDB=0.214055;SGB=-0.692831;RPB=0.913564;MQB=1;MQSB=1;BQB=1;MQ0F=0;ICB=1;HOB=0.5;AC=1;AN=2;DP4=1,6,6,18;MQ=20	GT:PL	0/1:131,0,26
Ref_Crab_Transcript_25989_331	272	A	G	53	DP=24;VDB=0.00430974;SGB=-0.670168;RPB=0.137833;MQB=1;MQSB=1;BQB=0.979219;MQ0F=0;ICB=1;HOB=0.5;AC=1;AN=2;DP4=3,11,4,6;MQ=20	GT:PL	0/1:86,0,107
Ref_Crab_Transcript_25991_1263	946	T	C	41.2278	DP=10;VDB=0.978429;SGB=-0.616816;RPB=0.895781;MQB=1.00775;MQSB=1.00775;BQB=0.895781;MQ0F=0;ICB=1;HOB=0.5;AC=1;AN=2;DP4=1,3,3,3;MQ=20	GT:PL	0/1:74,0,43
Ref_Crab_Transcript_25999_2263	214	A	T	79	DP=194;VDB=0.268334;SGB=-0.693147;RPB=0.811316;MQB=1;MQSB=1;BQB=0.903486;MQ0F=0;ICB=1;HOB=0.5;AC=1;AN=2;DP4=21,36,59,76;MQ=20	GT:PL	0/1:112,0,40
Ref_Crab_Transcript_26010_981	3	G	T	68	DP=69;VDB=4.03996e-22;SGB=-0.693145;RPB=0.0276046;MQB=1;MQSB=1;BQB=0.574133;MQ0F=0;ICB=1;HOB=0.5;AC=1;AN=2;DP4=3,8,25,15;MQ=20	GT:PL	0/1:102,0,37
Ref_Crab_Transcript_26031_419	187	A	T	70	DP=248;VDB=0.0604355;SGB=-0.693147;RPB=0.95087;MQB=1;MQSB=1;BQB=0.544294;MQ0F=0;ICB=1;HOB=0.5;AC=1;AN=2;DP4=64,23,131,27;MQ=20	GT:PL	0/1:103,0,56
Ref_Crab_Transcript_26037_1112	313	T	C	108	DP=182;VDB=0.475193;SGB=-0.693147;RPB=0.895333;MQB=1;MQSB=1;BQB=0.646346;MQ0F=0;ICB=1;HOB=0.5;AC=1;AN=2;DP4=45,27,57,43;MQ=20	GT:PL	0/1:141,0,111
Ref_Crab_Transcript_26047_2149	146	G	T	36.4051	DP=12;VDB=0.128784;SGB=-0.616816;RPB=0.931779;MQB=0.982603;MQSB=0.95494;BQB=0.71154;MQ0F=0;ICB=1;HOB=0.5;AC=1;AN=2;DP4=4,2,3,3;MQ=20	GT:PL	0/1:69,0,66
Ref_Crab_Transcript_26047_2149	408	C	G	40.8323	DP=37;VDB=0.194617;SGB=-0.680642;RPB=0.71018;MQB=1;MQSB=1;BQB=0.966877;MQ0F=0;ICB=1;HOB=0.5;AC=1;AN=2;DP4=14,11,7,5;MQ=20	GT:PL	0/1:74,0,141
Ref_Crab_Transcript_26049_3386	1598	G	C	80	DP=73;VDB=0.42867;SGB=-0.693097;RPB=0.759114;MQB=1;MQSB=1;BQB=0.79379;MQ0F=0;ICB=1;HOB=0.5;AC=1;AN=2;DP4=24,18,19,11;MQ=20	GT:PL	0/1:113,0,142
Ref_Crab_Transcript_26100_473	219	A	T	53	DP=14;VDB=0.648333;SGB=-0.662043;RPB=1;MQB=1;MQSB=1;BQB=0.039122;MQ0F=0;ICB=1;HOB=0.5;AC=1;AN=2;DP4=2,2,7,2;MQ=20	GT:PL	0/1:86,0,37
Ref_Crab_Transcript_26154_365	350	T	C	126	DP=26;VDB=2.68688e-05;SGB=-0.686358;RPB=-;MQB=-;MQSB=1;BQB=-;MQ0F=0;ICB=-;HOB=-;AC=2;AN=2;DP4=0,0,8,6;MQ=20	GT:PL	1/1:153,42,0
Ref_Crab_Transcript_26158_434	341	C	G	38.3688	DP=11;VDB=0.205815;SGB=-0.616816;RPB=0.950952;MQB=0.950952;MQSB=0.964642;BQB=0.683497;MQ0F=0;ICB=1;HOB=0.5;AC=1;AN=2;DP4=1,4,3,3;MQ=20	GT:PL	0/1:71,0,53
Ref_Crab_Transcript_26191_317	67	G	A	40.3506	DP=18;VDB=0.000839678;SGB=-0.670168;RPB=0.513192;MQB=1;MQSB=1;BQB=0.776754;MQ0F=0;ICB=1;HOB=0.5;AC=1;AN=2;DP4=7,1,9,1;MQ=20	GT:PL	0/1:73,0,62
Ref_Crab_Transcript_26191_317	85	G	A	50	DP=21;VDB=0.00083308;SGB=-0.676189;RPB=0.900548;MQB=1;MQSB=1;BQB=0.428034;MQ0F=0;ICB=1;HOB=0.5;AC=1;AN=2;DP4=7,3,9,2;MQ=20	GT:PL	0/1:83,0,86
Ref_Crab_Transcript_26192_1500	134	A	T	81	DP=24;VDB=0.120512;SGB=-0.683931;RPB=0.808949;MQB=1;MQSB=1;BQB=0.685969;MQ0F=0;ICB=1;HOB=0.5;AC=1;AN=2;DP4=7,3,7,6;MQ=20	GT:PL	0/1:114,0,81
Ref_Crab_Transcript_26203_391	191	C	T	60	DP=10;VDB=0.124768;SGB=-0.651104;RPB=0.375;MQB=1;MQSB=0.952347;BQB=1;MQ0F=0;ICB=1;HOB=0.5;AC=1;AN=2;DP4=0,2,5,3;MQ=20	GT:PL	0/1:92,0,8
Ref_Crab_Transcript_26205_343	48	T	C	58	DP=11;VDB=0.00350122;SGB=-0.651104;RPB=0.309786;MQB=1;MQSB=1;BQB=0.877913;MQ0F=0;ICB=1;HOB=0.5;AC=1;AN=2;DP4=3,0,5,3;MQ=20	GT:PL	0/1:91,0,20
Ref_Crab_Transcript_26205_343	70	A	C	77	DP=21;VDB=0.201406;SGB=-0.683931;RPB=0.685489;MQB=1;MQSB=1;BQB=0.95891;MQ0F=0;ICB=1;HOB=0.5;AC=1;AN=2;DP4=4,4,6,7;MQ=20	GT:PL	0/1:110,0,72
Ref_Crab_Transcript_26205_343	74	T	C	99	DP=21;VDB=0.239887;SGB=-0.689466;RPB=0.525788;MQB=1;MQSB=1;BQB=0.639909;MQ0F=0;ICB=1;HOB=0.5;AC=1;AN=2;DP4=2,2,8,8;MQ=20	GT:PL	0/1:132,0,12
Ref_Crab_Transcript_26205_343	76	G	C	98	DP=26;VDB=0.239887;SGB=-0.689466;RPB=0.255729;MQB=1;MQSB=1;BQB=0.803979;MQ0F=0;ICB=1;HOB=0.5;AC=1;AN=2;DP4=3,2,8,8;MQ=20	GT:PL	0/1:132,0,29
Ref_Crab_Transcript_26205_343	84	T	C	103	DP=33;VDB=0.46279;SGB=-0.692562;RPB=0.999608;MQB=1;MQSB=1;BQB=0.99375;MQ0F=0;ICB=1;HOB=0.5;AC=1;AN=2;DP4=4,2,7,15;MQ=20	GT:PL	0/1:137,0,23
Ref_Crab_Transcript_26205_343	106	T	C	107	DP=37;VDB=0.321672;SGB=-0.693079;RPB=0.463584;MQB=1;MQSB=1;BQB=0.578971;MQ0F=0;ICB=-;HOB=-;AC=2;AN=2;DP4=3,2,8,21;MQ=20	GT:PL	1/1:134,8,0
Ref_Crab_Transcript_26205_343	113	G	T	103	DP=42;VDB=0.0109145;SGB=-0.693021;RPB=0.292909;MQB=1;MQSB=1;BQB=0.0819995;MQ0F=0;ICB=1;HOB=0.5;AC=1;AN=2;DP4=6,6,7,20;MQ=20	GT:PL	0/1:136,0,71
Ref_Crab_Transcript_26205_343	139	C	T	151	DP=37;VDB=0.00631883;SGB=-0.693127;RPB=0.34469;MQB=1;MQSB=1;BQB=0.640218;MQ0F=0;ICB=-;HOB=-;AC=2;AN=2;DP4=1,2,10,23;MQ=20	GT:PL	1/1:178,49,0
Ref_Crab_Transcript_26205_343	160	G	A	129	DP=31;VDB=0.000798307;SGB=-0.692976;RPB=0.0202419;MQB=1;MQSB=1;BQB=0.626687;MQ0F=0;ICB=-;HOB=-;AC=2;AN=2;DP4=1,2,8,18;MQ=20	GT:PL	1/1:156,25,0
Ref_Crab_Transcript_26205_343	180	G	C	128	DP=19;VDB=6.11779e-05;SGB=-0.689466;RPB=1;MQB=1;MQSB=1;BQB=1;MQ0F=0;ICB=-;HOB=-;AC=2;AN=2;DP4=1,0,5,11;MQ=20	GT:PL	1/1:155,31,0
Ref_Crab_Transcript_26205_343	195	T	C	130	DP=14;VDB=9.25785e-05;SGB=-0.683931;RPB=-;MQB=-;MQSB=1;BQB=-;MQ0F=0;ICB=-;HOB=-;AC=2;AN=2;DP4=0,0,4,9;MQ=20	GT:PL	1/1:157,39,0
Ref_Crab_Transcript_26207_950	719	T	G	44.4044	DP=14;VDB=0.533926;SGB=-0.636426;RPB=0.966012;MQB=0.966012;MQSB=0.966012;BQB=0.30295;MQ0F=0;ICB=1;HOB=0.5;AC=1;AN=2;DP4=4,3,3,4;MQ=20	GT:PL	0/1:77,0,76
Ref_Crab_Transcript_26207_950	727	T	C	33.3803	DP=13;VDB=0.625428;SGB=-0.616816;RPB=0.961166;MQB=0.961166;MQSB=0.961166;BQB=0.470358;MQ0F=0;ICB=1;HOB=0.5;AC=1;AN=2;DP4=3,4,3,3;MQ=20	GT:PL	0/1:66,0,79
Ref_Crab_Transcript_26207_950	732	A	G	46.3785	DP=13;VDB=0.528186;SGB=-0.636426;RPB=0.899815;MQB=0.961166;MQSB=0.961166;BQB=0.623736;MQ0F=0;ICB=1;HOB=0.5;AC=1;AN=2;DP4=3,3,3,4;MQ=20	GT:PL	0/1:79,0,66
Ref_Crab_Transcript_26207_950	746	A	G	65	DP=14;VDB=0.65376;SGB=-0.662043;RPB=0.945959;MQB=1;MQSB=1;BQB=0.923116;MQ0F=0;ICB=1;HOB=0.5;AC=1;AN=2;DP4=2,3,4,5;MQ=20	GT:PL	0/1:98,0,49
Ref_Crab_Transcript_26207_950	753	A	G	60	DP=15;VDB=0.605799;SGB=-0.662043;RPB=0.764228;MQB=1;MQSB=1;BQB=0.945959;MQ0F=0;ICB=1;HOB=0.5;AC=1;AN=2;DP4=2,3,3,6;MQ=20	GT:PL	0/1:93,0,49
Ref_Crab_Transcript_26207_950	798	T	C	33.2319	DP=10;VDB=0.697961;SGB=-0.616816;RPB=0.895781;MQB=1.00775;MQSB=1;BQB=0.895781;MQ0F=0;ICB=1;HOB=0.5;AC=1;AN=2;DP4=0,4,1,5;MQ=20	GT:PL	0/1:66,0,36
Ref_Crab_Transcript_26219_853	461	T	C	32.3808	DP=13;VDB=0.275478;SGB=-0.616816;RPB=0.695312;MQB=0.961166;MQSB=1;BQB=0.378331;MQ0F=0;ICB=1;HOB=0.5;AC=1;AN=2;DP4=3,4,2,4;MQ=20	GT:PL	0/1:65,0,79
Ref_Crab_Transcript_26238_907	305	C	T	115	DP=12;VDB=0.0258627;SGB=-0.676189;RPB=-;MQB=-;MQSB=0.950952;BQB=-;MQ0F=0;ICB=-;HOB=-;AC=2;AN=2;DP4=0,0,6,5;MQ=20	GT:PL	1/1:142,33,0
Ref_Crab_Transcript_26248_340	181	C	T	40.3788	DP=14;VDB=0.62127;SGB=-0.636426;RPB=0.899815;MQB=0.961166;MQSB=1;BQB=0.531709;MQ0F=0;ICB=1;HOB=0.5;AC=1;AN=2;DP4=3,3,5,2;MQ=20	GT:PL	0/1:73,0,66
Ref_Crab_Transcript_26248_340	182	C	T	40.3788	DP=14;VDB=0.62127;SGB=-0.636426;RPB=0.899815;MQB=0.961166;MQSB=1;BQB=0.695312;MQ0F=0;ICB=1;HOB=0.5;AC=1;AN=2;DP4=3,3,5,2;MQ=20	GT:PL	0/1:73,0,66
Ref_Crab_Transcript_26269_607	68	G	A	39.228	DP=10;VDB=0.101965;SGB=-0.616816;RPB=1.00775;MQB=1.00775;MQSB=0.916482;BQB=0.727822;MQ0F=0;ICB=1;HOB=0.5;AC=1;AN=2;DP4=1,3,2,4;MQ=20	GT:PL	0/1:72,0,43
Ref_Crab_Transcript_26270_929	443	G	A	61	DP=11;VDB=0.357952;SGB=-0.651104;RPB=0.0803926;MQB=1;MQSB=0.964642;BQB=0.0497871;MQ0F=0;ICB=1;HOB=0.5;AC=1;AN=2;DP4=0,3,4,4;MQ=20	GT:PL	0/1:94,0,20
Ref_Crab_Transcript_26270_929	465	C	T	63	DP=10;VDB=0.346875;SGB=-0.651104;RPB=0.125;MQB=1;MQSB=1.00775;BQB=0.5;MQ0F=0;ICB=1;HOB=0.5;AC=1;AN=2;DP4=0,2,4,4;MQ=20	GT:PL	0/1:95,0,8
Ref_Crab_Transcript_26270_929	682	C	G	41.2276	DP=10;VDB=0.258434;SGB=-0.616816;RPB=0.111973;MQB=1.00775;MQSB=0.952347;BQB=0.895781;MQ0F=0;ICB=1;HOB=0.5;AC=1;AN=2;DP4=2,2,3,3;MQ=20	GT:PL	0/1:74,0,45
Ref_Crab_Transcript_26275_1392	313	T	A	39.7699	DP=118;VDB=0.425965;SGB=-0.693141;RPB=0.7497;MQB=1;MQSB=1;BQB=0.696859;MQ0F=0;ICB=1;HOB=0.5;AC=1;AN=2;DP4=53,27,21,16;MQ=20	GT:PL	0/1:73,0,116
Ref_Crab_Transcript_26275_1392	547	T	C	82	DP=173;VDB=0.997877;SGB=-0.693147;RPB=0.924113;MQB=1;MQSB=1;BQB=0.943381;MQ0F=0;ICB=1;HOB=0.5;AC=1;AN=2;DP4=50,50,35,37;MQ=20	GT:PL	0/1:115,0,144
Ref_Crab_Transcript_26296_532	189	T	C	58	DP=33;VDB=0.147087;SGB=-0.683931;RPB=0.356168;MQB=1;MQSB=1;BQB=0.840502;MQ0F=0;ICB=1;HOB=0.5;AC=1;AN=2;DP4=7,13,8,5;MQ=20	GT:PL	0/1:91,0,136
Ref_Crab_Transcript_26319_831	505	C	T	92	DP=21;VDB=0.669416;SGB=-0.686358;RPB=0.866141;MQB=1;MQSB=1;BQB=0.0917576;MQ0F=0;ICB=1;HOB=0.5;AC=1;AN=2;DP4=2,4,6,8;MQ=20	GT:PL	0/1:125,0,47
Ref_Crab_Transcript_26319_831	507	G	T	92	DP=21;VDB=0.669416;SGB=-0.686358;RPB=0.866141;MQB=1;MQSB=1;BQB=0.00566488;MQ0F=0;ICB=1;HOB=0.5;AC=1;AN=2;DP4=2,4,6,8;MQ=20	GT:PL	0/1:125,0,47
Ref_Crab_Transcript_26320_973	286	C	T	36.3938	DP=16;VDB=0.49286;SGB=-0.651104;RPB=0.351229;MQB=1;MQSB=1;BQB=0.0289435;MQ0F=0;ICB=1;HOB=0.5;AC=1;AN=2;DP4=1,6,1,7;MQ=20	GT:PL	0/1:69,0,64
Ref_Crab_Transcript_26339_763	553	G	T	46.3619	DP=18;VDB=0.389581;SGB=-0.651104;RPB=0.86753;MQB=1;MQSB=1;BQB=0.965097;MQ0F=0;ICB=1;HOB=0.5;AC=1;AN=2;DP4=4,6,4,4;MQ=20	GT:PL	0/1:79,0,96
Ref_Crab_Transcript_26344_894	563	G	A	36.4044	DP=12;VDB=0.147842;SGB=-0.616816;RPB=0.813189;MQB=0.982603;MQSB=0.982603;BQB=0.931779;MQ0F=0;ICB=1;HOB=0.5;AC=1;AN=2;DP4=3,3,3,3;MQ=20	GT:PL	0/1:69,0,67
Ref_Crab_Transcript_26349_400	163	T	C	36.6938	DP=129;VDB=0.0339667;SGB=-0.693143;RPB=0.0953633;MQB=1;MQSB=1;BQB=0.0653214;MQ0F=0;ICB=1;HOB=0.5;AC=1;AN=2;DP4=43,43,17,21;MQ=20	GT:PL	0/1:70,0,126
Ref_Crab_Transcript_26349_400	279	C	T	77	DP=46;VDB=0.891037;SGB=-0.692067;RPB=0.997793;MQB=1;MQSB=1;BQB=0.246743;MQ0F=0;ICB=1;HOB=0.5;AC=1;AN=2;DP4=7,19,5,15;MQ=20	GT:PL	0/1:110,0,135
Ref_Crab_Transcript_26360_1215	1031	G	A	116	DP=688;VDB=0.000562184;SGB=-0.693147;RPB=0.916662;MQB=1;MQSB=1;BQB=0.0113377;MQ0F=0;ICB=1;HOB=0.5;AC=1;AN=2;DP4=144,173,171,178;MQ=20	GT:PL	0/1:149,0,146
Ref_Crab_Transcript_26366_3470	246	G	A	39.6405	DP=94;VDB=0.453611;SGB=-0.693054;RPB=0.574187;MQB=1;MQSB=1;BQB=0.713775;MQ0F=0;ICB=1;HOB=0.5;AC=1;AN=2;DP4=23,40,9,19;MQ=20	GT:PL	0/1:73,0,140
Ref_Crab_Transcript_26368_2160	1870	C	T	63	DP=22;VDB=0.975882;SGB=-0.676189;RPB=0.770381;MQB=1;MQSB=1;BQB=0.31966;MQ0F=0;ICB=1;HOB=0.5;AC=1;AN=2;DP4=7,4,7,4;MQ=20	GT:PL	0/1:96,0,96
Ref_Crab_Transcript_26390_882	362	T	A	92	DP=67;VDB=0.922532;SGB=-0.69311;RPB=0.361702;MQB=1;MQSB=1;BQB=0.979092;MQ0F=0;ICB=1;HOB=0.5;AC=1;AN=2;DP4=8,27,19,12;MQ=20	GT:PL	0/1:125,0,137
Ref_Crab_Transcript_26391_740	682	T	A	40.4003	DP=7528;VDB=0;SGB=-0.693147;RPB=0.0373315;MQB=1;MQSB=1;BQB=0;MQ0F=0;ICB=1;HOB=0.5;AC=1;AN=2;DP4=963,857,1711,103;MQ=20	GT:PL	0/1:73,0,148
Ref_Crab_Transcript_26391_740	685	T	A	46.0228	DP=7389;VDB=0;SGB=-0.693147;RPB=1.13838e-06;MQB=1;MQSB=1;BQB=3.64399e-25;MQ0F=0;ICB=1;HOB=0.5;AC=1;AN=2;DP4=676,270,1739,81;MQ=20	GT:PL	0/1:79,0,46
Ref_Crab_Transcript_26391_740	690	G	T	51	DP=6934;VDB=0;SGB=-0.693147;RPB=0.944327;MQB=1;MQSB=1;BQB=0.00362957;MQ0F=0;ICB=1;HOB=0.5;AC=1;AN=2;DP4=1037,60,1150,40;MQ=20	GT:PL	0/1:84,0,99
Ref_Crab_Transcript_26391_740	696	G	T	62	DP=4927;VDB=0;SGB=-0.693147;RPB=1.56609e-05;MQB=1;MQSB=1;BQB=0.726362;MQ0F=0;ICB=1;HOB=0.5;AC=1;AN=2;DP4=288,11,385,11;MQ=20	GT:PL	0/1:95,0,70
Ref_Crab_Transcript_26395_875	730	A	G	41.3851	DP=15;VDB=0.994767;SGB=-0.636426;RPB=0.985046;MQB=1;MQSB=1;BQB=0.959011;MQ0F=0;ICB=1;HOB=0.5;AC=1;AN=2;DP4=2,6,3,4;MQ=20	GT:PL	0/1:74,0,81
Ref_Crab_Transcript_26406_531	102	C	T	47.282	DP=12;VDB=0.525314;SGB=-0.636426;RPB=0.896474;MQB=0.95494;MQSB=0.95494;BQB=0.935451;MQ0F=0;ICB=1;HOB=0.5;AC=1;AN=2;DP4=3,2,4,3;MQ=20	GT:PL	0/1:80,0,54
Ref_Crab_Transcript_26407_677	412	T	C	45.3786	DP=13;VDB=0.084975;SGB=-0.636426;RPB=0.378331;MQB=0.961166;MQSB=0.961166;BQB=0.194278;MQ0F=0;ICB=1;HOB=0.5;AC=1;AN=2;DP4=3,3,4,3;MQ=20	GT:PL	0/1:78,0,66
Ref_Crab_Transcript_26447_394	297	A	G	42.321	DP=14;VDB=0.000709792;SGB=-0.636426;RPB=0.0194886;MQB=0.95494;MQSB=0.95494;BQB=0.331306;MQ0F=0;ICB=1;HOB=0.5;AC=1;AN=2;DP4=3,2,4,3;MQ=20	GT:PL	0/1:75,0,54
Ref_Crab_Transcript_26447_394	301	G	T	49.0695	DP=11;VDB=0.000709792;SGB=-0.636426;RPB=0.0401934;MQB=0.964642;MQSB=0.950952;BQB=0.643095;MQ0F=0;ICB=1;HOB=0.5;AC=1;AN=2;DP4=2,2,4,3;MQ=20	GT:PL	0/1:82,0,42
Ref_Crab_Transcript_26447_394	305	A	G	46.7452	DP=10;VDB=0.000709793;SGB=-0.636426;RPB=0.0916482;MQB=0.916482;MQSB=0.952347;BQB=0.183296;MQ0F=0;ICB=1;HOB=0.5;AC=1;AN=2;DP4=1,2,4,3;MQ=20	GT:PL	0/1:80,0,28
Ref_Crab_Transcript_26447_394	310	C	G	51	DP=10;VDB=0.000709793;SGB=-0.636426;RPB=0.0916482;MQB=0.916482;MQSB=0.952347;BQB=0.733186;MQ0F=0;ICB=1;HOB=0.5;AC=1;AN=2;DP4=1,2,4,3;MQ=20	GT:PL	0/1:84,0,28
Ref_Crab_Transcript_26447_394	311	A	G	51	DP=10;VDB=0.000709793;SGB=-0.636426;RPB=0.0916482;MQB=0.916482;MQSB=0.952347;BQB=0.274945;MQ0F=0;ICB=1;HOB=0.5;AC=1;AN=2;DP4=1,2,4,3;MQ=20	GT:PL	0/1:84,0,28
Ref_Crab_Transcript_26501_946	726	A	C	53	DP=19;VDB=0.581149;SGB=-0.662043;RPB=0.999167;MQB=1;MQSB=1;BQB=0.934728;MQ0F=0;ICB=1;HOB=0.5;AC=1;AN=2;DP4=3,7,4,5;MQ=20	GT:PL	0/1:86,0,94
Ref_Crab_Transcript_26505_379	250	T	C	51	DP=10;VDB=0.296193;SGB=-0.636426;RPB=0.366593;MQB=0.916482;MQSB=1.00775;BQB=0.366593;MQ0F=0;ICB=1;HOB=0.5;AC=1;AN=2;DP4=2,1,4,3;MQ=20	GT:PL	0/1:84,0,28
Ref_Crab_Transcript_26506_1963	776	A	G	81	DP=104;VDB=0.0500406;SGB=-0.693143;RPB=0.682419;MQB=1;MQSB=1;BQB=0.338751;MQ0F=0;ICB=1;HOB=0.5;AC=1;AN=2;DP4=30,31,13,25;MQ=20	GT:PL	0/1:114,0,145
Ref_Crab_Transcript_26513_1684	111	A	C	67	DP=103;VDB=0.397372;SGB=-0.693144;RPB=0.0276505;MQB=1;MQSB=1;BQB=0.999792;MQ0F=0;ICB=1;HOB=0.5;AC=1;AN=2;DP4=47,17,25,14;MQ=20	GT:PL	0/1:100,0,121
Ref_Crab_Transcript_26527_514	158	C	G	87	DP=65;VDB=0.97117;SGB=-0.693054;RPB=0.965509;MQB=1;MQSB=1;BQB=0.168322;MQ0F=0;ICB=1;HOB=0.5;AC=1;AN=2;DP4=17,20,16,12;MQ=20	GT:PL	0/1:120,0,148
Ref_Crab_Transcript_26560_653	273	C	T	60	DP=12;VDB=0.13615;SGB=-0.651104;RPB=0.979382;MQB=1;MQSB=0.950952;BQB=0.979382;MQ0F=0;ICB=1;HOB=0.5;AC=1;AN=2;DP4=2,1,4,4;MQ=20	GT:PL	0/1:94,0,25
Ref_Crab_Transcript_26564_1246	596	G	A	62	DP=17;VDB=0.907284;SGB=-0.670168;RPB=0.71829;MQB=1;MQSB=1;BQB=0.106803;MQ0F=0;ICB=1;HOB=0.5;AC=1;AN=2;DP4=2,4,7,3;MQ=20	GT:PL	0/1:95,0,57
Ref_Crab_Transcript_26567_1944	429	T	G	35.7156	DP=109;VDB=0.0129125;SGB=-0.693127;RPB=0.992244;MQB=1;MQSB=1;BQB=0.983552;MQ0F=0;ICB=1;HOB=0.5;AC=1;AN=2;DP4=53,21,20,13;MQ=20	GT:PL	0/1:69,0,112
Ref_Crab_Transcript_26583_1115	1076	A	G	49.2692	DP=10;VDB=0.0328229;SGB=-0.616816;RPB=0.503877;MQB=0.783809;MQSB=0.75;BQB=0.727822;MQ0F=0;ICB=1;HOB=0.5;AC=1;AN=2;DP4=1,3,1,5;MQ=24	GT:PL	0/1:82,0,62
Ref_Crab_Transcript_26607_372	199	A	G	72	DP=112;VDB=0.408776;SGB=-0.693145;RPB=0.658914;MQB=1;MQSB=1;BQB=0.404595;MQ0F=0;ICB=1;HOB=0.5;AC=1;AN=2;DP4=33,37,15,25;MQ=20	GT:PL	0/1:105,0,141
Ref_Crab_Transcript_26623_1877	1206	A	G	59	DP=13;VDB=0.961302;SGB=-0.651104;RPB=0.493254;MQB=1;MQSB=1;BQB=0.397295;MQ0F=0;ICB=1;HOB=0.5;AC=1;AN=2;DP4=4,0,4,4;MQ=20	GT:PL	0/1:92,0,31
Ref_Crab_Transcript_26626_723	309	T	G	79	DP=33;VDB=0.0542427;SGB=-0.688148;RPB=0.102682;MQB=1;MQSB=1;BQB=0.741082;MQ0F=0;ICB=1;HOB=0.5;AC=1;AN=2;DP4=8,9,8,7;MQ=20	GT:PL	0/1:112,0,126
Ref_Crab_Transcript_26630_3035	2382	G	A	41.1242	DP=25;VDB=0.2421;SGB=-0.662043;RPB=0.652391;MQB=1;MQSB=1;BQB=0.544197;MQ0F=0;ICB=1;HOB=0.5;AC=1;AN=2;DP4=6,9,3,6;MQ=20	GT:PL	0/1:74,0,126
Ref_Crab_Transcript_26662_694	100	C	T	36.6722	DP=10;VDB=0.921138;SGB=-0.636426;RPB=0.916482;MQB=0.916482;MQSB=0.916482;BQB=0.183296;MQ0F=0;ICB=1;HOB=0.5;AC=1;AN=2;DP4=1,2,6,1;MQ=20	GT:PL	0/1:70,0,28
Ref_Crab_Transcript_26665_1542	1226	T	A	95	DP=87;VDB=0.415985;SGB=-0.693143;RPB=0.972813;MQB=1;MQSB=1;BQB=0.733686;MQ0F=0;ICB=1;HOB=0.5;AC=1;AN=2;DP4=26,22,20,18;MQ=20	GT:PL	0/1:128,0,142
Ref_Crab_Transcript_26668_509	85	T	C	92	DP=14;VDB=0.137841;SGB=-0.680642;RPB=0.5;MQB=1;MQSB=0.966012;BQB=0.5;MQ0F=0;ICB=-;HOB=-;AC=2;AN=2;DP4=0,2,7,5;MQ=20	GT:PL	1/1:119,4,0
Ref_Crab_Transcript_26668_509	109	G	A	39.3362	DP=17;VDB=0.150745;SGB=-0.636426;RPB=0.95083;MQB=1;MQSB=1;BQB=0.987474;MQ0F=0;ICB=1;HOB=0.5;AC=1;AN=2;DP4=3,6,3,4;MQ=20	GT:PL	0/1:72,0,92
Ref_Crab_Transcript_26717_401	193	G	A	41.2272	DP=20;VDB=0.452509;SGB=-0.651104;RPB=0.953497;MQB=1;MQSB=1;BQB=0.785785;MQ0F=0;ICB=1;HOB=0.5;AC=1;AN=2;DP4=6,6,4,4;MQ=20	GT:PL	0/1:74,0,112
Ref_Crab_Transcript_26730_366	179	A	G	47.1666	DP=26;VDB=0.108725;SGB=-0.670168;RPB=0.541994;MQB=1;MQSB=1;BQB=0.972267;MQ0F=0;ICB=1;HOB=0.5;AC=1;AN=2;DP4=9,7,6,4;MQ=20	GT:PL	0/1:80,0,125
Ref_Crab_Transcript_26735_522	86	C	A	93	DP=10;VDB=0.0151657;SGB=-0.651104;RPB=-;MQB=-;MQSB=0.900802;BQB=-;MQ0F=0;ICB=-;HOB=-;AC=2;AN=2;DP4=0,0,3,5;MQ=20	GT:PL	1/1:120,24,0
Ref_Crab_Transcript_26735_522	170	T	C	38.2283	DP=10;VDB=0.651328;SGB=-0.616816;RPB=0.895781;MQB=1.00775;MQSB=0.916482;BQB=0.895781;MQ0F=0;ICB=1;HOB=0.5;AC=1;AN=2;DP4=3,1,4,2;MQ=20	GT:PL	0/1:71,0,42
Ref_Crab_Transcript_26754_603	179	G	T	35.7702	DP=105;VDB=0.0774766;SGB=-0.69312;RPB=0.723751;MQB=1;MQSB=1;BQB=0.52676;MQ0F=0;ICB=1;HOB=0.5;AC=1;AN=2;DP4=54,16,21,11;MQ=20	GT:PL	0/1:69,0,107
Ref_Crab_Transcript_26775_728	337	T	C	65	DP=71;VDB=0.691187;SGB=-0.692831;RPB=0.799948;MQB=1;MQSB=1;BQB=0.23276;MQ0F=0;ICB=1;HOB=0.5;AC=1;AN=2;DP4=32,14,10,14;MQ=20	GT:PL	0/1:98,0,127
Ref_Crab_Transcript_26775_728	506	T	C	53	DP=110;VDB=0.510607;SGB=-0.693136;RPB=0.922477;MQB=1;MQSB=1;BQB=0.950475;MQ0F=0;ICB=1;HOB=0.5;AC=1;AN=2;DP4=24,48,13,22;MQ=20	GT:PL	0/1:86,0,144
Ref_Crab_Transcript_26778_329	69	G	A	42.7803	DP=43;VDB=0.0198684;SGB=-0.683931;RPB=0.880594;MQB=1;MQSB=1;BQB=0.9652;MQ0F=0;ICB=1;HOB=0.5;AC=1;AN=2;DP4=20,8,7,6;MQ=20	GT:PL	0/1:76,0,125
Ref_Crab_Transcript_26796_473	302	G	A	45.4043	DP=17;VDB=0.000220624;SGB=-0.651104;RPB=0.00699028;MQB=1;MQSB=1;BQB=0.00352788;MQ0F=0;ICB=1;HOB=0.5;AC=1;AN=2;DP4=5,3,2,6;MQ=20	GT:PL	0/1:78,0,81
Ref_Crab_Transcript_26822_334	192	A	G	56	DP=95;VDB=0.688025;SGB=-0.693097;RPB=0.573016;MQB=1;MQSB=1;BQB=0.965256;MQ0F=0;ICB=1;HOB=0.5;AC=1;AN=2;DP4=26,35,13,17;MQ=20	GT:PL	0/1:89,0,144
Ref_Crab_Transcript_26823_1968	200	C	T	85	DP=330;VDB=0.0767442;SGB=-0.693147;RPB=0.87625;MQB=1;MQSB=1;BQB=0.879229;MQ0F=0;ICB=1;HOB=0.5;AC=1;AN=2;DP4=121,67,84,51;MQ=20	GT:PL	0/1:118,0,147
Ref_Crab_Transcript_26828_1252	359	A	G	46.9858	DP=198;VDB=0.0150248;SGB=-0.693147;RPB=0.883825;MQB=1;MQSB=1;BQB=0.619782;MQ0F=0;ICB=1;HOB=0.5;AC=1;AN=2;DP4=63,64,28,41;MQ=20	GT:PL	0/1:80,0,131
Ref_Crab_Transcript_26840_458	102	A	G	34.7111	DP=40;VDB=0.18368;SGB=-0.680642;RPB=0.959078;MQB=1;MQSB=1;BQB=0.986093;MQ0F=0;ICB=1;HOB=0.5;AC=1;AN=2;DP4=14,13,7,5;MQ=20	GT:PL	0/1:68,0,141
Ref_Crab_Transcript_26860_469	278	G	C	85	DP=10;VDB=0.0417199;SGB=-0.662043;RPB=1;MQB=1;MQSB=0.952347;BQB=1;MQ0F=0;ICB=-;HOB=-;AC=2;AN=2;DP4=0,1,5,4;MQ=20	GT:PL	1/1:112,10,0
Ref_Crab_Transcript_26888_2740	2290	C	T	40.3852	DP=15;VDB=0.596338;SGB=-0.636426;RPB=0.651439;MQB=1;MQSB=1;BQB=0.114218;MQ0F=0;ICB=1;HOB=0.5;AC=1;AN=2;DP4=4,4,4,3;MQ=20	GT:PL	0/1:73,0,86
Ref_Crab_Transcript_26900_1995	1729	G	T	60	DP=32;VDB=0.66732;SGB=-0.680642;RPB=0.888249;MQB=1;MQSB=1;BQB=0.760015;MQ0F=0;ICB=1;HOB=0.5;AC=1;AN=2;DP4=11,7,5,7;MQ=20	GT:PL	0/1:93,0,126
Ref_Crab_Transcript_26900_1995	1739	T	C	87	DP=29;VDB=0.682714;SGB=-0.688148;RPB=0.681797;MQB=1;MQSB=1;BQB=0.800053;MQ0F=0;ICB=1;HOB=0.5;AC=1;AN=2;DP4=8,5,7,8;MQ=20	GT:PL	0/1:120,0,101
Ref_Crab_Transcript_26903_652	481	A	T	32.8137	DP=32;VDB=0.412749;SGB=-0.662043;RPB=0.646113;MQB=1;MQSB=1;BQB=0.934206;MQ0F=0;ICB=1;HOB=0.5;AC=1;AN=2;DP4=14,5,4,5;MQ=20	GT:PL	0/1:66,0,116
Ref_Crab_Transcript_26907_333	108	C	T	35.3693	DP=11;VDB=0.264054;SGB=-0.616816;RPB=0.891517;MQB=0.950952;MQSB=0.964642;BQB=0.8618;MQ0F=0;ICB=1;HOB=0.5;AC=1;AN=2;DP4=3,2,4,2;MQ=20	GT:PL	0/1:68,0,57
Ref_Crab_Transcript_26909_652	485	T	C	52	DP=84;VDB=0.526736;SGB=-0.692914;RPB=0.941294;MQB=1;MQSB=1;BQB=0.9933;MQ0F=0;ICB=1;HOB=0.5;AC=1;AN=2;DP4=20,34,9,16;MQ=20	GT:PL	0/1:85,0,147
Ref_Crab_Transcript_26910_3080	1796	G	C	43.2584	DP=22;VDB=0.437652;SGB=-0.662043;RPB=0.744627;MQB=1;MQSB=1;BQB=0.291905;MQ0F=0;ICB=1;HOB=0.5;AC=1;AN=2;DP4=8,5,6,3;MQ=20	GT:PL	0/1:76,0,111
Ref_Crab_Transcript_26916_604	264	G	A	36.0845	DP=12;VDB=0.0907276;SGB=-0.636426;RPB=0.924449;MQB=0.964642;MQSB=1;BQB=0.803868;MQ0F=0;ICB=1;HOB=0.5;AC=1;AN=2;DP4=1,3,1,6;MQ=20	GT:PL	0/1:69,0,38
Ref_Crab_Transcript_26924_695	212	A	T	42.2822	DP=15;VDB=0.0674539;SGB=-0.636426;RPB=0.331306;MQB=0.95494;MQSB=0.95494;BQB=0.838008;MQ0F=0;ICB=1;HOB=0.5;AC=1;AN=2;DP4=3,2,4,3;MQ=20	GT:PL	0/1:75,0,50
Ref_Crab_Transcript_26930_3364	2531	C	T	112	DP=237;VDB=0.0125405;SGB=-0.693147;RPB=0.784648;MQB=1;MQSB=1;BQB=0.142574;MQ0F=0;ICB=1;HOB=0.5;AC=1;AN=2;DP4=46,63,66,53;MQ=20	GT:PL	0/1:145,0,145
Ref_Crab_Transcript_26937_303	61	A	C	110	DP=77;VDB=2.3331e-14;SGB=-0.693147;RPB=-;MQB=-;MQSB=1;BQB=-;MQ0F=0;ICB=-;HOB=-;AC=2;AN=2;DP4=0,0,67,6;MQ=20	GT:PL	1/1:137,220,0
Ref_Crab_Transcript_26937_303	79	T	A	56	DP=93;VDB=1.82116e-10;SGB=-0.693147;RPB=0.80037;MQB=1;MQSB=1;BQB=0.0317424;MQ0F=0;ICB=-;HOB=-;AC=2;AN=2;DP4=19,1,63,9;MQ=20	GT:PL	1/1:84,26,0
Ref_Crab_Transcript_26941_551	301	C	T	89	DP=48;VDB=0.0256175;SGB=-0.692976;RPB=0.999786;MQB=1;MQSB=1;BQB=0.43916;MQ0F=0;ICB=1;HOB=0.5;AC=1;AN=2;DP4=19,3,18,8;MQ=20	GT:PL	0/1:122,0,84
Ref_Crab_Transcript_26945_965	21	C	T	31.7006	DP=34;VDB=0.000193683;SGB=-0.670168;RPB=0.536221;MQB=1;MQSB=1;BQB=0.422713;MQ0F=0;ICB=1;HOB=0.5;AC=1;AN=2;DP4=9,14,4,6;MQ=20	GT:PL	0/1:65,0,142
Ref_Crab_Transcript_26982_395	278	G	A	63	DP=10;VDB=0.233344;SGB=-0.651104;RPB=0.75;MQB=1;MQSB=0.952347;BQB=1;MQ0F=0;ICB=1;HOB=0.5;AC=1;AN=2;DP4=2,0,3,5;MQ=20	GT:PL	0/1:95,0,8
Ref_Crab_Transcript_26986_1145	516	A	G	59	DP=845;VDB=0.998639;SGB=-0.693147;RPB=0.837912;MQB=1;MQSB=1;BQB=0.0798029;MQ0F=0;ICB=1;HOB=0.5;AC=1;AN=2;DP4=190,312,123,208;MQ=20	GT:PL	0/1:92,0,150
Ref_Crab_Transcript_26986_1145	637	G	A	107	DP=686;VDB=0.943983;SGB=-0.693147;RPB=0.988967;MQB=1;MQSB=1;BQB=1.4396e-07;MQ0F=0;ICB=1;HOB=0.5;AC=1;AN=2;DP4=149,204,146,149;MQ=20	GT:PL	0/1:140,0,155
Ref_Crab_Transcript_26988_1438	940	G	A	44.385	DP=15;VDB=0.940991;SGB=-0.651104;RPB=0.993326;MQB=1;MQSB=1;BQB=0.753577;MQ0F=0;ICB=1;HOB=0.5;AC=1;AN=2;DP4=2,5,6,2;MQ=20	GT:PL	0/1:77,0,71
Ref_Crab_Transcript_27005_965	687	A	G	39.3362	DP=16;VDB=0.281405;SGB=-0.636426;RPB=1;MQB=1;MQSB=1;BQB=0.892753;MQ0F=0;ICB=1;HOB=0.5;AC=1;AN=2;DP4=4,5,3,4;MQ=20	GT:PL	0/1:72,0,94
Ref_Crab_Transcript_27020_1386	412	C	G	98	DP=10;VDB=0.588772;SGB=-0.662043;RPB=-;MQB=-;MQSB=0.974597;BQB=-;MQ0F=0;ICB=-;HOB=-;AC=2;AN=2;DP4=0,0,5,4;MQ=20	GT:PL	1/1:125,27,0
Ref_Crab_Transcript_27029_1181	878	C	T	35.4053	DP=13;VDB=0.969631;SGB=-0.616816;RPB=0.71154;MQB=0.982603;MQSB=0.95494;BQB=0.0338829;MQ0F=0;ICB=1;HOB=0.5;AC=1;AN=2;DP4=3,3,2,4;MQ=20	GT:PL	0/1:68,0,69
Ref_Crab_Transcript_27029_1181	900	C	T	32.3854	DP=17;VDB=0.0303686;SGB=-0.616816;RPB=0.0297172;MQB=0.950952;MQSB=0.964642;BQB=0.208021;MQ0F=0;ICB=1;HOB=0.5;AC=1;AN=2;DP4=3,2,4,2;MQ=20	GT:PL	0/1:65,0,57
Ref_Crab_Transcript_27029_1181	960	C	T	79	DP=19;VDB=0.26042;SGB=-0.680642;RPB=0.968368;MQB=1;MQSB=1;BQB=0.400803;MQ0F=0;ICB=1;HOB=0.5;AC=1;AN=2;DP4=4,3,5,7;MQ=20	GT:PL	0/1:112,0,63
Ref_Crab_Transcript_27029_1181	997	C	T	36.4012	DP=15;VDB=0.991468;SGB=-0.616816;RPB=0.864013;MQB=0.982603;MQSB=0.95494;BQB=0.372712;MQ0F=0;ICB=1;HOB=0.5;AC=1;AN=2;DP4=2,4,3,3;MQ=20	GT:PL	0/1:69,0,62
Ref_Crab_Transcript_27032_464	301	C	G	107	DP=152;VDB=0.99892;SGB=-0.693147;RPB=0.974109;MQB=1;MQSB=1;BQB=0.492459;MQ0F=0;ICB=1;HOB=0.5;AC=1;AN=2;DP4=15,61,23,43;MQ=20	GT:PL	0/1:140,0,154
Ref_Crab_Transcript_27058_958	461	T	C	84	DP=177;VDB=0.69693;SGB=-0.693147;RPB=0.114027;MQB=1;MQSB=1;BQB=0.999918;MQ0F=0;ICB=1;HOB=0.5;AC=1;AN=2;DP4=39,58,39,32;MQ=20	GT:PL	0/1:117,0,152
Ref_Crab_Transcript_27114_5234	1759	G	A	39.9619	DP=319;VDB=0.00233027;SGB=-0.693147;RPB=0.121923;MQB=1;MQSB=1;BQB=0.976724;MQ0F=0;ICB=1;HOB=0.5;AC=1;AN=2;DP4=90,114,44,63;MQ=20	GT:PL	0/1:73,0,136
Ref_Crab_Transcript_27124_314	197	A	G	48.4043	DP=16;VDB=0.49048;SGB=-0.651104;RPB=0.702619;MQB=1;MQSB=1;BQB=0.846352;MQ0F=0;ICB=1;HOB=0.5;AC=1;AN=2;DP4=5,3,5,3;MQ=20	GT:PL	0/1:81,0,81
Ref_Crab_Transcript_27134_316	148	T	C	35.9801	DP=36;VDB=0.00826316;SGB=-0.680642;RPB=0.0497195;MQB=1;MQSB=1;BQB=0.880767;MQ0F=0;ICB=1;HOB=0.5;AC=1;AN=2;DP4=17,6,9,3;MQ=20	GT:PL	0/1:69,0,116
Ref_Crab_Transcript_27134_316	155	T	C	67	DP=38;VDB=0.000936194;SGB=-0.688148;RPB=0.0186432;MQB=1;MQSB=1;BQB=1;MQ0F=0;ICB=1;HOB=0.5;AC=1;AN=2;DP4=18,5,8,7;MQ=20	GT:PL	0/1:100,0,111
Ref_Crab_Transcript_27134_316	171	A	G	74	DP=42;VDB=0.0034721;SGB=-0.690438;RPB=0.00708493;MQB=1;MQSB=1;BQB=0.00380779;MQ0F=0;ICB=1;HOB=0.5;AC=1;AN=2;DP4=16,7,10,7;MQ=20	GT:PL	0/1:107,0,122
Ref_Crab_Transcript_27158_471	331	C	T	73	DP=89;VDB=0.438907;SGB=-0.69312;RPB=0.304955;MQB=1;MQSB=1;BQB=0.557479;MQ0F=0;ICB=1;HOB=0.5;AC=1;AN=2;DP4=22,32,10,22;MQ=20	GT:PL	0/1:106,0,150
Ref_Crab_Transcript_27162_689	283	T	A	31.3712	DP=11;VDB=0.885182;SGB=-0.616816;RPB=0.950952;MQB=0.950952;MQSB=1;BQB=0.564628;MQ0F=0;ICB=1;HOB=0.5;AC=1;AN=2;DP4=2,3,1,5;MQ=20	GT:PL	0/1:64,0,57
Ref_Crab_Transcript_27188_495	31	T	C	30.0838	DP=10;VDB=0.107235;SGB=-0.511536;RPB=-;MQB=-;MQSB=1;BQB=-;MQ0F=0;ICB=-;HOB=-;AC=2;AN=2;DP4=0,0,1,2;MQ=20	GT:PL	1/1:57,9,0
Ref_Crab_Transcript_27189_535	308	A	G	48.8946	DP=12;VDB=0.979347;SGB=-0.651104;RPB=0.94394;MQB=1;MQSB=1;BQB=0.174611;MQ0F=0;ICB=1;HOB=0.5;AC=1;AN=2;DP4=2,2,6,2;MQ=20	GT:PL	0/1:82,0,39
Ref_Crab_Transcript_27189_535	314	T	C	48.8946	DP=12;VDB=0.979347;SGB=-0.651104;RPB=0.94394;MQB=1;MQSB=1;BQB=0.397295;MQ0F=0;ICB=1;HOB=0.5;AC=1;AN=2;DP4=2,2,6,2;MQ=20	GT:PL	0/1:82,0,39
Ref_Crab_Transcript_27198_477	81	A	G	66	DP=11;VDB=0.160383;SGB=-0.662043;RPB=0.222222;MQB=0;MQSB=0.950952;BQB=0.833333;MQ0F=0;ICB=1;HOB=0.5;AC=1;AN=2;DP4=1,1,5,4;MQ=22	GT:PL	0/1:100,0,35
Ref_Crab_Transcript_27201_2369	1391	G	A	100	DP=1419;VDB=0.241788;SGB=-0.693147;RPB=0.388684;MQB=1;MQSB=1;BQB=0.234964;MQ0F=0;ICB=1;HOB=0.5;AC=1;AN=2;DP4=519,374,296,212;MQ=20	GT:PL	0/1:133,0,151
Ref_Crab_Transcript_27213_721	349	A	G	206	DP=245;VDB=0.680403;SGB=-0.693147;RPB=0.238261;MQB=1;MQSB=1;BQB=0.639646;MQ0F=0;ICB=-;HOB=-;AC=2;AN=2;DP4=3,2,181,52;MQ=20	GT:PL	1/1:233,255,0
Ref_Crab_Transcript_27252_358	254	C	G	77	DP=26;VDB=0.494876;SGB=-0.683931;RPB=0.9941;MQB=1;MQSB=1;BQB=0.147024;MQ0F=0;ICB=1;HOB=0.5;AC=1;AN=2;DP4=2,10,5,8;MQ=20	GT:PL	0/1:110,0,85
Ref_Crab_Transcript_27272_824	303	A	T	81	DP=20;VDB=0.798635;SGB=-0.680642;RPB=0.334958;MQB=1;MQSB=1;BQB=0.597928;MQ0F=0;ICB=1;HOB=0.5;AC=1;AN=2;DP4=5,2,6,6;MQ=20	GT:PL	0/1:114,0,59
Ref_Crab_Transcript_27275_509	138	T	C	52	DP=11;VDB=0.387294;SGB=-0.651104;RPB=0.875;MQB=1;MQSB=0.916482;BQB=0.9375;MQ0F=0;ICB=1;HOB=0.5;AC=1;AN=2;DP4=1,1,6,2;MQ=20	GT:PL	0/1:85,0,10
Ref_Crab_Transcript_27280_536	42	G	A	34.8778	DP=63;VDB=3.10831e-05;SGB=-0.689466;RPB=0.184981;MQB=1;MQSB=1;BQB=0.404722;MQ0F=0;ICB=1;HOB=0.5;AC=1;AN=2;DP4=27,5,12,4;MQ=20	GT:PL	0/1:68,0,99
Ref_Crab_Transcript_27280_536	118	A	G	103	DP=144;VDB=0.227499;SGB=-0.693147;RPB=0.813903;MQB=1;MQSB=1;BQB=0.210529;MQ0F=0;ICB=1;HOB=0.5;AC=1;AN=2;DP4=42,17,48,36;MQ=20	GT:PL	0/1:136,0,103
Ref_Crab_Transcript_27286_886	356	C	G	37.7361	DP=46;VDB=0.34069;SGB=-0.686358;RPB=0.357533;MQB=1;MQSB=1;BQB=0.897183;MQ0F=0;ICB=1;HOB=0.5;AC=1;AN=2;DP4=12,19,9,5;MQ=20	GT:PL	0/1:71,0,150
Ref_Crab_Transcript_27298_381	191	C	T	31.3712	DP=11;VDB=0.0521054;SGB=-0.616816;RPB=0.0891517;MQB=0.950952;MQSB=1;BQB=0.742931;MQ0F=0;ICB=1;HOB=0.5;AC=1;AN=2;DP4=2,3,1,5;MQ=20	GT:PL	0/1:64,0,57
Ref_Crab_Transcript_27315_374	246	C	A	46.0556	DP=36;VDB=0.45831;SGB=-0.683931;RPB=0.250794;MQB=1;MQSB=1;BQB=0.877833;MQ0F=0;ICB=1;HOB=0.5;AC=1;AN=2;DP4=3,20,3,10;MQ=20	GT:PL	0/1:79,0,111
Ref_Crab_Transcript_27355_2231	236	C	T	51	DP=87;VDB=0.0297405;SGB=-0.693136;RPB=0.0595561;MQB=1;MQSB=1;BQB=0.486166;MQ0F=0;ICB=1;HOB=0.5;AC=1;AN=2;DP4=32,18,29,6;MQ=20	GT:PL	0/1:84,0,134
Ref_Crab_Transcript_27360_362	207	G	T	117	DP=92;VDB=0.040023;SGB=-0.693147;RPB=0.364095;MQB=1;MQSB=1;BQB=0.469875;MQ0F=0;ICB=1;HOB=0.5;AC=1;AN=2;DP4=14,19,15,39;MQ=20	GT:PL	0/1:150,0,113
Ref_Crab_Transcript_27364_1694	1578	C	T	38.3508	DP=18;VDB=0.0966918;SGB=-0.651104;RPB=0.620251;MQB=1;MQSB=1;BQB=0.258985;MQ0F=0;ICB=1;HOB=0.5;AC=1;AN=2;DP4=5,5,6,2;MQ=20	GT:PL	0/1:71,0,100
Ref_Crab_Transcript_27379_594	295	T	A	92	DP=11;VDB=0.0898754;SGB=-0.670168;RPB=1;MQB=1;MQSB=1;BQB=1;MQ0F=0;ICB=-;HOB=-;AC=2;AN=2;DP4=0,1,3,7;MQ=20	GT:PL	1/1:119,13,0
Ref_Crab_Transcript_27379_594	333	C	T	31.4043	DP=12;VDB=0.688859;SGB=-0.616816;RPB=0.0847072;MQB=0.982603;MQSB=0.95494;BQB=0.931779;MQ0F=0;ICB=1;HOB=0.5;AC=1;AN=2;DP4=4,2,3,3;MQ=20	GT:PL	0/1:64,0,66
Ref_Crab_Transcript_27387_1271	343	G	C	41.3851	DP=15;VDB=0.422204;SGB=-0.636426;RPB=0.616426;MQB=1;MQSB=1;BQB=0.381255;MQ0F=0;ICB=1;HOB=0.5;AC=1;AN=2;DP4=4,4,3,4;MQ=20	GT:PL	0/1:74,0,86
Ref_Crab_Transcript_27394_324	151	G	A	85	DP=14;VDB=0.666096;SGB=-0.680642;RPB=0.875;MQB=1;MQSB=1;BQB=1;MQ0F=0;ICB=-;HOB=-;AC=2;AN=2;DP4=1,1,4,8;MQ=20	GT:PL	1/1:112,2,0
Ref_Crab_Transcript_27409_952	420	G	A	39.2047	DP=20;VDB=0.44307;SGB=-0.651104;RPB=0.604728;MQB=1;MQSB=1;BQB=0.913904;MQ0F=0;ICB=1;HOB=0.5;AC=1;AN=2;DP4=6,6,4,4;MQ=20	GT:PL	0/1:72,0,112
Ref_Crab_Transcript_27422_707	213	C	T	41.2272	DP=20;VDB=0.325119;SGB=-0.651104;RPB=0.993326;MQB=1;MQSB=1;BQB=0.988166;MQ0F=0;ICB=1;HOB=0.5;AC=1;AN=2;DP4=8,4,4,4;MQ=20	GT:PL	0/1:74,0,105
Ref_Crab_Transcript_27430_502	163	C	T	30.3865	DP=16;VDB=0.144094;SGB=-0.636426;RPB=0.87319;MQB=1;MQSB=1;BQB=0.97357;MQ0F=0;ICB=1;HOB=0.5;AC=1;AN=2;DP4=7,1,6,1;MQ=20	GT:PL	0/1:63,0,68
Ref_Crab_Transcript_27431_365	268	C	A	41.2278	DP=11;VDB=0.582158;SGB=-0.616816;RPB=0.727822;MQB=1.00775;MQSB=1.00775;BQB=0.279932;MQ0F=0;ICB=1;HOB=0.5;AC=1;AN=2;DP4=1,3,3,3;MQ=20	GT:PL	0/1:74,0,43
Ref_Crab_Transcript_27453_1625	185	C	T	90	DP=191;VDB=0.0315042;SGB=-0.693147;RPB=0.307658;MQB=1;MQSB=1;BQB=0.153388;MQ0F=0;ICB=1;HOB=0.5;AC=1;AN=2;DP4=72,25,66,25;MQ=20	GT:PL	0/1:123,0,127
Ref_Crab_Transcript_27453_1625	1148	T	G	30.6001	DP=122;VDB=0.206225;SGB=-0.693139;RPB=0.987479;MQB=1;MQSB=1;BQB=0.443239;MQ0F=0;ICB=1;HOB=0.5;AC=1;AN=2;DP4=26,59,13,23;MQ=20	GT:PL	0/1:64,0,137
Ref_Crab_Transcript_27468_912	620	G	A	119	DP=230;VDB=0.0213895;SGB=-0.693147;RPB=0.146674;MQB=1;MQSB=1;BQB=0.451291;MQ0F=0;ICB=1;HOB=0.5;AC=1;AN=2;DP4=41,54,59,69;MQ=20	GT:PL	0/1:152,0,124
Ref_Crab_Transcript_27469_400	247	G	A	77	DP=39;VDB=0.561782;SGB=-0.690438;RPB=0.738371;MQB=1;MQSB=1;BQB=0.995099;MQ0F=0;ICB=1;HOB=0.5;AC=1;AN=2;DP4=10,12,8,9;MQ=20	GT:PL	0/1:110,0,138
Ref_Crab_Transcript_27489_884	116	C	G	79	DP=13;VDB=0.456924;SGB=-0.670168;RPB=0.8;MQB=1;MQSB=0.95494;BQB=0.65;MQ0F=0;ICB=1;HOB=0.5;AC=1;AN=2;DP4=1,1,4,6;MQ=20	GT:PL	0/1:109,0,4
Ref_Crab_Transcript_27495_486	1	T	C	38.2519	DP=10;VDB=0.000411984;SGB=-0.616816;RPB=0.783809;MQB=1.00775;MQSB=0.916482;BQB=0.335918;MQ0F=0;ICB=1;HOB=0.5;AC=1;AN=2;DP4=4,0,3,3;MQ=20	GT:PL	0/1:71,0,36
Ref_Crab_Transcript_27499_528	192	T	C	30.1155	DP=19;VDB=0.453474;SGB=-0.636426;RPB=0.257165;MQB=1;MQSB=1;BQB=0.772568;MQ0F=0;ICB=1;HOB=0.5;AC=1;AN=2;DP4=7,5,4,3;MQ=20	GT:PL	0/1:63,0,108
Ref_Crab_Transcript_27499_528	463	C	T	139	DP=20;VDB=0.0735894;SGB=-0.69168;RPB=1;MQB=1;MQSB=1;BQB=1;MQ0F=0;ICB=-;HOB=-;AC=2;AN=2;DP4=0,1,5,14;MQ=20	GT:PL	1/1:166,40,0
Ref_Crab_Transcript_27559_2691	1636	G	A	44.4044	DP=14;VDB=0.593542;SGB=-0.636426;RPB=0.777382;MQB=0.966012;MQSB=1;BQB=0.360111;MQ0F=0;ICB=1;HOB=0.5;AC=1;AN=2;DP4=3,4,3,4;MQ=20	GT:PL	0/1:77,0,77
Ref_Crab_Transcript_27562_431	28	C	T	72	DP=13;VDB=5.7509e-06;SGB=-0.676189;RPB=0.681818;MQB=1;MQSB=1;BQB=0.5;MQ0F=0;ICB=-;HOB=-;AC=2;AN=2;DP4=2,0,8,3;MQ=20	GT:PL	1/1:99,1,0
Ref_Crab_Transcript_27570_403	242	T	C	38.8932	DP=46;VDB=0.758724;SGB=-0.688148;RPB=0.293864;MQB=1;MQSB=1;BQB=0.577828;MQ0F=0;ICB=1;HOB=0.5;AC=1;AN=2;DP4=17,13,11,4;MQ=20	GT:PL	0/1:72,0,143
Ref_Crab_Transcript_27590_643	264	T	C	33.406	DP=15;VDB=0.316447;SGB=-0.636426;RPB=0.428703;MQB=0.966012;MQSB=1;BQB=0.885987;MQ0F=0;ICB=1;HOB=0.5;AC=1;AN=2;DP4=2,5,1,6;MQ=20	GT:PL	0/1:66,0,74
Ref_Crab_Transcript_27592_1496	971	G	A	37.3689	DP=11;VDB=0.59895;SGB=-0.616816;RPB=0.8618;MQB=0.950952;MQSB=0.964642;BQB=0.950952;MQ0F=0;ICB=1;HOB=0.5;AC=1;AN=2;DP4=2,3,2,4;MQ=20	GT:PL	0/1:70,0,57
Ref_Crab_Transcript_27603_390	2	T	G	70	DP=30;VDB=7.99077e-13;SGB=-0.692067;RPB=0.224287;MQB=1;MQSB=1;BQB=0.0477535;MQ0F=0;ICB=1;HOB=0.5;AC=1;AN=2;DP4=3,5,12,8;MQ=20	GT:PL	0/1:105,2,48
Ref_Crab_Transcript_27603_390	3	A	G	30.8387	DP=47;VDB=3.43389e-08;SGB=-0.683931;RPB=0.199441;MQB=1;MQSB=1;BQB=0.496408;MQ0F=0;ICB=1;HOB=0.5;AC=1;AN=2;DP4=18,11,5,8;MQ=20	GT:PL	0/1:64,0,115
Ref_Crab_Transcript_27603_390	4	G	A	74	DP=49;VDB=4.76197e-08;SGB=-0.686358;RPB=0.840657;MQB=1;MQSB=1;BQB=0.994065;MQ0F=0;ICB=1;HOB=0.5;AC=1;AN=2;DP4=9,6,8,6;MQ=20	GT:PL	0/1:107,0,108
Ref_Crab_Transcript_27618_1096	506	C	T	105	DP=111;VDB=0.625134;SGB=-0.693147;RPB=0.971425;MQB=1;MQSB=1;BQB=0.149809;MQ0F=0;ICB=1;HOB=0.5;AC=1;AN=2;DP4=22,35,19,30;MQ=20	GT:PL	0/1:138,0,149
Ref_Crab_Transcript_27619_822	452	A	G	75	DP=111;VDB=0.88285;SGB=-0.693145;RPB=0.900776;MQB=1;MQSB=1;BQB=0.283773;MQ0F=0;ICB=1;HOB=0.5;AC=1;AN=2;DP4=29,38,19,21;MQ=20	GT:PL	0/1:108,0,146
Ref_Crab_Transcript_27626_1257	689	T	C	37.2826	DP=12;VDB=0.308783;SGB=-0.636426;RPB=0.6821;MQB=0.95494;MQSB=1;BQB=0.6821;MQ0F=0;ICB=1;HOB=0.5;AC=1;AN=2;DP4=2,3,1,6;MQ=20	GT:PL	0/1:70,0,55
Ref_Crab_Transcript_27666_728	548	C	T	59	DP=17;VDB=0.935112;SGB=-0.662043;RPB=0.928603;MQB=1;MQSB=1;BQB=0.846482;MQ0F=0;ICB=1;HOB=0.5;AC=1;AN=2;DP4=6,2,4,5;MQ=20	GT:PL	0/1:92,0,73
Ref_Crab_Transcript_27721_722	382	G	T	58	DP=11;VDB=0.347684;SGB=-0.662043;RPB=0.222222;MQB=1;MQSB=1;BQB=0.333333;MQ0F=0;ICB=1;HOB=0.5;AC=1;AN=2;DP4=2,0,7,2;MQ=20	GT:PL	0/1:88,0,5
Ref_Crab_Transcript_27741_383	257	A	G	45.6715	DP=10;VDB=0.0674539;SGB=-0.636426;RPB=0.916482;MQB=0.916482;MQSB=0.916482;BQB=0.733186;MQ0F=0;ICB=1;HOB=0.5;AC=1;AN=2;DP4=2,1,5,2;MQ=20	GT:PL	0/1:79,0,28
Ref_Crab_Transcript_27741_383	276	G	T	69	DP=11;VDB=0.167636;SGB=-0.662043;RPB=0.888889;MQB=1;MQSB=0.950952;BQB=0.222222;MQ0F=0;ICB=1;HOB=0.5;AC=1;AN=2;DP4=1,1,5,4;MQ=20	GT:PL	0/1:101,0,7
Ref_Crab_Transcript_27742_444	330	A	G	34.4922	DP=46;VDB=0.753212;SGB=-0.683931;RPB=0.680004;MQB=0.973501;MQSB=0.99994;BQB=0.525486;MQ0F=0;ICB=1;HOB=0.5;AC=1;AN=2;DP4=16,17,7,6;MQ=20	GT:PL	0/1:68,0,165
Ref_Crab_Transcript_27744_463	364	T	C	59	DP=94;VDB=0.00435931;SGB=-0.693097;RPB=0.689283;MQB=1;MQSB=1;BQB=0.00892285;MQ0F=0;ICB=1;HOB=0.5;AC=1;AN=2;DP4=14,44,8,22;MQ=20	GT:PL	0/1:92,0,148
Ref_Crab_Transcript_27744_463	425	T	C	74	DP=27;VDB=0.00198685;SGB=-0.683931;RPB=0.48971;MQB=1;MQSB=1;BQB=0.936543;MQ0F=0;ICB=1;HOB=0.5;AC=1;AN=2;DP4=3,5,3,10;MQ=20	GT:PL	0/1:107,0,71
Ref_Crab_Transcript_27758_579	319	T	C	31.3177	DP=14;VDB=0.40105;SGB=-0.616816;RPB=0.997919;MQB=1;MQSB=1;BQB=0.332178;MQ0F=0;ICB=1;HOB=0.5;AC=1;AN=2;DP4=6,2,3,3;MQ=20	GT:PL	0/1:64,0,79
Ref_Crab_Transcript_27760_420	111	G	A	54	DP=19;VDB=0.896306;SGB=-0.662043;RPB=0.77918;MQB=1;MQSB=1;BQB=0.210251;MQ0F=0;ICB=1;HOB=0.5;AC=1;AN=2;DP4=6,3,5,4;MQ=20	GT:PL	0/1:87,0,85
Ref_Crab_Transcript_27766_478	278	G	A	86	DP=76;VDB=0.0455364;SGB=-0.693097;RPB=0.722834;MQB=1;MQSB=1;BQB=0.360975;MQ0F=0;ICB=1;HOB=0.5;AC=1;AN=2;DP4=22,23,14,16;MQ=20	GT:PL	0/1:119,0,148
Ref_Crab_Transcript_27783_527	82	C	T	45.5815	DP=11;VDB=0.154499;SGB=-0.662043;RPB=0.555556;MQB=1;MQSB=1;BQB=0.944444;MQ0F=0;ICB=1;HOB=0.5;AC=1;AN=2;DP4=2,0,8,1;MQ=20	GT:PL	0/1:76,0,5
Ref_Crab_Transcript_27801_644	458	C	T	65	DP=12;VDB=0.377003;SGB=-0.662043;RPB=0.857404;MQB=1;MQSB=1;BQB=0.180974;MQ0F=0;ICB=1;HOB=0.5;AC=1;AN=2;DP4=0,3,3,6;MQ=20	GT:PL	0/1:99,0,16
Ref_Crab_Transcript_27831_974	516	T	C	55	DP=14;VDB=0.939575;SGB=-0.651104;RPB=0.94925;MQB=1;MQSB=1;BQB=0.664757;MQ0F=0;ICB=1;HOB=0.5;AC=1;AN=2;DP4=2,4,4,4;MQ=20	GT:PL	0/1:88,0,62
Ref_Crab_Transcript_27850_393	247	T	C	39.0501	DP=25;VDB=0.176359;SGB=-0.662043;RPB=0.68044;MQB=1;MQSB=1;BQB=0.338465;MQ0F=0;ICB=1;HOB=0.5;AC=1;AN=2;DP4=8,8,5,4;MQ=20	GT:PL	0/1:72,0,129
Ref_Crab_Transcript_27866_738	228	A	G	35.1447	DP=29;VDB=0.0201996;SGB=-0.676189;RPB=0.987702;MQB=1;MQSB=1;BQB=0.772143;MQ0F=0;ICB=1;HOB=0.5;AC=1;AN=2;DP4=11,7,9,2;MQ=20	GT:PL	0/1:68,0,127
Ref_Crab_Transcript_27866_738	361	A	G	39.3161	DP=20;VDB=0.50952;SGB=-0.651104;RPB=0.464383;MQB=1;MQSB=1;BQB=0.129211;MQ0F=0;ICB=1;HOB=0.5;AC=1;AN=2;DP4=4,7,2,6;MQ=20	GT:PL	0/1:72,0,101
Ref_Crab_Transcript_27886_1314	3	G	C	34.3453	DP=21;VDB=8.68317e-07;SGB=-0.670168;RPB=0.124514;MQB=1;MQSB=1;BQB=0.829029;MQ0F=0;ICB=1;HOB=0.5;AC=1;AN=2;DP4=3,6,5,5;MQ=20	GT:PL	0/1:67,0,86
Ref_Crab_Transcript_27886_1314	4	T	A	42.359	DP=22;VDB=8.68317e-07;SGB=-0.670168;RPB=0.0832066;MQB=1;MQSB=1;BQB=0.571209;MQ0F=0;ICB=1;HOB=0.5;AC=1;AN=2;DP4=3,7,5,5;MQ=20	GT:PL	0/1:75,0,92
Ref_Crab_Transcript_27928_736	495	G	C	35.3694	DP=11;VDB=0.0549273;SGB=-0.616816;RPB=0.0297172;MQB=0.950952;MQSB=1;BQB=0.208021;MQ0F=0;ICB=1;HOB=0.5;AC=1;AN=2;DP4=4,1,4,2;MQ=20	GT:PL	0/1:68,0,52
Ref_Crab_Transcript_27928_736	503	A	G	35.3712	DP=15;VDB=0.345209;SGB=-0.636426;RPB=0.0521764;MQB=1;MQSB=1;BQB=0.161524;MQ0F=0;ICB=1;HOB=0.5;AC=1;AN=2;DP4=5,3,4,3;MQ=20	GT:PL	0/1:68,0,83
Ref_Crab_Transcript_27931_455	36	G	A	61	DP=19;VDB=7.55472e-05;SGB=-0.689466;RPB=0.67032;MQB=1;MQSB=1;BQB=0.998439;MQ0F=0;ICB=-;HOB=-;AC=2;AN=2;DP4=3,0,14,2;MQ=20	GT:PL	1/1:88,2,0
Ref_Crab_Transcript_27931_455	121	C	A	33.6487	DP=73;VDB=0.389889;SGB=-0.692352;RPB=0.0356332;MQB=1;MQSB=1;BQB=0.469134;MQ0F=0;ICB=1;HOB=0.5;AC=1;AN=2;DP4=28,21,14,7;MQ=20	GT:PL	0/1:67,0,135
Ref_Crab_Transcript_27937_672	305	G	A	86	DP=118;VDB=0.968801;SGB=-0.693147;RPB=0.854607;MQB=1;MQSB=1;BQB=0.933851;MQ0F=0;ICB=1;HOB=0.5;AC=1;AN=2;DP4=37,31,25,23;MQ=20	GT:PL	0/1:119,0,141
Ref_Crab_Transcript_27947_327	193	T	G	41.9282	DP=10;VDB=0.0511907;SGB=-0.616816;RPB=0.924584;MQB=0.924584;MQSB=1;BQB=0.924584;MQ0F=0;ICB=1;HOB=0.5;AC=1;AN=2;DP4=0,3,2,4;MQ=20	GT:PL	0/1:75,0,26
Ref_Crab_Transcript_27958_880	468	C	T	57	DP=20;VDB=0.690639;SGB=-0.670168;RPB=0.849308;MQB=1;MQSB=1;BQB=0.448955;MQ0F=0;ICB=1;HOB=0.5;AC=1;AN=2;DP4=4,5,3,7;MQ=20	GT:PL	0/1:90,0,88
Ref_Crab_Transcript_27976_442	206	C	T	41.9823	DP=47;VDB=0.0168132;SGB=-0.689466;RPB=0.995754;MQB=1;MQSB=1;BQB=0.921779;MQ0F=0;ICB=1;HOB=0.5;AC=1;AN=2;DP4=17,13,12,4;MQ=20	GT:PL	0/1:75,0,143
Ref_Crab_Transcript_28019_426	176	G	C	30.9853	DP=24;VDB=0.213741;SGB=-0.651104;RPB=0.567118;MQB=1;MQSB=1;BQB=0.0672055;MQ0F=0;ICB=1;HOB=0.5;AC=1;AN=2;DP4=4,11,5,3;MQ=20	GT:PL	0/1:64,0,119
Ref_Crab_Transcript_28028_1849	889	A	G	33.3803	DP=13;VDB=0.52412;SGB=-0.616816;RPB=0.112477;MQB=0.961166;MQSB=1;BQB=0.0204503;MQ0F=0;ICB=1;HOB=0.5;AC=1;AN=2;DP4=5,2,3,3;MQ=20	GT:PL	0/1:66,0,73
Ref_Crab_Transcript_28030_535	193	T	C	94	DP=34;VDB=0.0678885;SGB=-0.690438;RPB=0.989451;MQB=1;MQSB=1;BQB=0.717072;MQ0F=0;ICB=1;HOB=0.5;AC=1;AN=2;DP4=4,4,10,7;MQ=20	GT:PL	0/1:127,0,61
Ref_Crab_Transcript_28036_316	270	A	T	65	DP=27;VDB=0.000959156;SGB=-0.688148;RPB=0.81023;MQB=1;MQSB=1;BQB=0.2628;MQ0F=0;ICB=1;HOB=0.5;AC=1;AN=2;DP4=4,7,12,3;MQ=20	GT:PL	0/1:98,0,91
Ref_Crab_Transcript_28045_404	283	A	G	44.1941	DP=23;VDB=0.565813;SGB=-0.662043;RPB=0.289361;MQB=1;MQSB=1;BQB=0.167677;MQ0F=0;ICB=1;HOB=0.5;AC=1;AN=2;DP4=9,5,5,4;MQ=20	GT:PL	0/1:77,0,114
Ref_Crab_Transcript_28053_986	222	A	G	31.3712	DP=11;VDB=0.111502;SGB=-0.616816;RPB=0.891517;MQB=0.950952;MQSB=1;BQB=0.742931;MQ0F=0;ICB=1;HOB=0.5;AC=1;AN=2;DP4=1,4,1,5;MQ=20	GT:PL	0/1:64,0,53
Ref_Crab_Transcript_28060_424	171	C	T	86	DP=130;VDB=0.952978;SGB=-0.693147;RPB=0.924503;MQB=1;MQSB=1;BQB=0.138441;MQ0F=0;ICB=1;HOB=0.5;AC=1;AN=2;DP4=46,25,31,23;MQ=20	GT:PL	0/1:119,0,132
Ref_Crab_Transcript_28075_807	161	A	G	83	DP=26;VDB=0.94699;SGB=-0.686358;RPB=0.945647;MQB=1;MQSB=1;BQB=0.928296;MQ0F=0;ICB=1;HOB=0.5;AC=1;AN=2;DP4=5,7,7,7;MQ=20	GT:PL	0/1:116,0,101
Ref_Crab_Transcript_28082_1030	122	G	A	30.3822	DP=13;VDB=0.503448;SGB=-0.616816;RPB=0.920266;MQB=0.961166;MQSB=1;BQB=0.31698;MQ0F=0;ICB=1;HOB=0.5;AC=1;AN=2;DP4=5,2,4,2;MQ=20	GT:PL	0/1:63,0,73
Ref_Crab_Transcript_28088_1071	2	T	A	54	DP=28;VDB=4.36568e-08;SGB=-0.680642;RPB=0.0123529;MQB=1;MQSB=1;BQB=0.909669;MQ0F=0;ICB=1;HOB=0.5;AC=1;AN=2;DP4=3,10,2,10;MQ=20	GT:PL	0/1:87,0,101
Ref_Crab_Transcript_28125_879	285	C	T	89	DP=21;VDB=0.0398901;SGB=-0.686358;RPB=0.00433005;MQB=1;MQSB=1;BQB=0.0917576;MQ0F=0;ICB=1;HOB=0.5;AC=1;AN=2;DP4=0,6,8,6;MQ=20	GT:PL	0/1:122,0,32
Ref_Crab_Transcript_28125_879	286	C	T	77	DP=19;VDB=0.0510722;SGB=-0.683931;RPB=0.36729;MQB=1;MQSB=1;BQB=0.560724;MQ0F=0;ICB=1;HOB=0.5;AC=1;AN=2;DP4=1,3,7,6;MQ=20	GT:PL	0/1:111,0,25
Ref_Crab_Transcript_28125_879	290	T	C	53	DP=21;VDB=0.00127738;SGB=-0.662043;RPB=0.247381;MQB=1;MQSB=1;BQB=0.83135;MQ0F=0;ICB=1;HOB=0.5;AC=1;AN=2;DP4=6,5,4,5;MQ=20	GT:PL	0/1:86,0,104
Ref_Crab_Transcript_28125_879	341	T	C	73	DP=47;VDB=0.404482;SGB=-0.690438;RPB=0.591373;MQB=1;MQSB=1;BQB=0.87112;MQ0F=0;ICB=1;HOB=0.5;AC=1;AN=2;DP4=17,8,9,8;MQ=20	GT:PL	0/1:106,0,127
Ref_Crab_Transcript_28125_879	372	C	T	85	DP=50;VDB=0.0317134;SGB=-0.693079;RPB=0.989913;MQB=1;MQSB=1;BQB=0.651598;MQ0F=0;ICB=1;HOB=0.5;AC=1;AN=2;DP4=9,11,22,7;MQ=20	GT:PL	0/1:118,0,112
Ref_Crab_Transcript_28132_2786	175	C	T	35.4053	DP=13;VDB=0.923066;SGB=-0.616816;RPB=0.71154;MQB=0.982603;MQSB=0.982603;BQB=0.931779;MQ0F=0;ICB=1;HOB=0.5;AC=1;AN=2;DP4=4,2,2,4;MQ=20	GT:PL	0/1:68,0,66
Ref_Crab_Transcript_28133_521	404	C	T	41.2276	DP=10;VDB=0.0202676;SGB=-0.616816;RPB=0.167959;MQB=1.00775;MQSB=0.952347;BQB=0.503877;MQ0F=0;ICB=1;HOB=0.5;AC=1;AN=2;DP4=2,2,3,3;MQ=20	GT:PL	0/1:74,0,45
Ref_Crab_Transcript_28133_521	410	G	A	41.2276	DP=10;VDB=0.0202676;SGB=-0.616816;RPB=0.111973;MQB=1.00775;MQSB=0.952347;BQB=0.783809;MQ0F=0;ICB=1;HOB=0.5;AC=1;AN=2;DP4=2,2,3,3;MQ=20	GT:PL	0/1:74,0,45
Ref_Crab_Transcript_28133_521	423	T	C	41.8216	DP=10;VDB=0.00625083;SGB=-0.616816;RPB=0.25;MQB=1;MQSB=0.992367;BQB=0;MQ0F=0;ICB=1;HOB=0.5;AC=1;AN=2;DP4=0,2,4,2;MQ=20	GT:PL	0/1:75,0,14
Ref_Crab_Transcript_28136_371	83	C	T	75	DP=37;VDB=0.137695;SGB=-0.692914;RPB=0.992802;MQB=1;MQSB=1;BQB=0.426775;MQ0F=0;ICB=1;HOB=0.5;AC=1;AN=2;DP4=10,1,20,5;MQ=20	GT:PL	0/1:108,0,43
Ref_Crab_Transcript_28137_314	35	G	A	37.2826	DP=12;VDB=0.0044822;SGB=-0.636426;RPB=0.40926;MQB=0.95494;MQSB=1;BQB=0.584657;MQ0F=0;ICB=1;HOB=0.5;AC=1;AN=2;DP4=3,2,1,6;MQ=20	GT:PL	0/1:70,0,54
Ref_Crab_Transcript_28137_314	50	G	A	43.3923	DP=21;VDB=0.000917248;SGB=-0.670168;RPB=0.986755;MQB=1;MQSB=1;BQB=0.381619;MQ0F=0;ICB=1;HOB=0.5;AC=1;AN=2;DP4=5,4,1,9;MQ=20	GT:PL	0/1:76,0,87
Ref_Crab_Transcript_28137_314	59	G	A	91	DP=24;VDB=0.000203005;SGB=-0.690438;RPB=0.800633;MQB=1;MQSB=1;BQB=0.135176;MQ0F=0;ICB=1;HOB=0.5;AC=1;AN=2;DP4=4,3,5,12;MQ=20	GT:PL	0/1:124,0,50
Ref_Crab_Transcript_28147_407	54	A	T	85	DP=44;VDB=0.000338098;SGB=-0.692717;RPB=0.546524;MQB=1;MQSB=1;BQB=0.0169738;MQ0F=0;ICB=1;HOB=0.5;AC=1;AN=2;DP4=9,7,14,9;MQ=20	GT:PL	0/1:118,0,102
Ref_Crab_Transcript_28147_407	390	G	A	175	DP=86;VDB=2.64678e-31;SGB=-0.693147;RPB=-;MQB=-;MQSB=1;BQB=-;MQ0F=0;ICB=-;HOB=-;AC=2;AN=2;DP4=0,0,40,29;MQ=20	GT:PL	1/1:202,208,0
Ref_Crab_Transcript_28147_407	400	G	T	63	DP=65;VDB=1.22108e-12;SGB=-0.692067;RPB=9.69821e-07;MQB=1;MQSB=1;BQB=0.109112;MQ0F=0;ICB=1;HOB=0.5;AC=1;AN=2;DP4=6,12,17,3;MQ=20	GT:PL	0/1:96,0,119
Ref_Crab_Transcript_28147_407	401	A	G	124	DP=44;VDB=1.22108e-12;SGB=-0.692067;RPB=-;MQB=-;MQSB=1;BQB=-;MQ0F=0;ICB=-;HOB=-;AC=2;AN=2;DP4=0,0,17,3;MQ=20	GT:PL	1/1:151,60,0
Ref_Crab_Transcript_28148_1264	452	T	C	86	DP=70;VDB=0.00245722;SGB=-0.693147;RPB=0.803523;MQB=1;MQSB=1;BQB=0.275222;MQ0F=0;ICB=1;HOB=0.5;AC=1;AN=2;DP4=22,2,34,11;MQ=20	GT:PL	0/1:119,0,49
Ref_Crab_Transcript_28177_326	2	G	A	71	DP=289;VDB=1.4013e-45;SGB=-0.693147;RPB=0.390755;MQB=1;MQSB=1;BQB=0.794518;MQ0F=0;ICB=1;HOB=0.5;AC=1;AN=2;DP4=42,12,20,39;MQ=20	GT:PL	0/1:104,0,102
Ref_Crab_Transcript_28189_1629	320	A	G	58	DP=283;VDB=0.009727;SGB=-0.693147;RPB=0.796189;MQB=1;MQSB=1;BQB=0.827084;MQ0F=0;ICB=-;HOB=-;AC=2;AN=2;DP4=66,18,148,41;MQ=20	GT:PL	1/1:86,7,0
Ref_Crab_Transcript_28190_4498	7	C	G	79	DP=16;VDB=0.000287461;SGB=-0.636426;RPB=-;MQB=-;MQSB=1.01283;BQB=-;MQ0F=0;ICB=-;HOB=-;AC=2;AN=2;DP4=0,0,3,4;MQ=20	GT:PL	1/1:106,21,0
Ref_Crab_Transcript_28190_4498	9	A	G	72	DP=17;VDB=0.00143357;SGB=-0.616816;RPB=-;MQB=-;MQSB=0.861511;BQB=-;MQ0F=0;ICB=-;HOB=-;AC=2;AN=2;DP4=0,0,3,3;MQ=20	GT:PL	1/1:99,18,0
Ref_Crab_Transcript_28190_4498	12	T	A	53	DP=22;VDB=0.00459396;SGB=-0.590765;RPB=-;MQB=-;MQSB=1;BQB=-;MQ0F=0;ICB=-;HOB=-;AC=2;AN=2;DP4=0,0,3,2;MQ=20	GT:PL	1/1:80,15,0
Ref_Crab_Transcript_28200_2012	845	A	G	116	DP=130;VDB=0.570297;SGB=-0.693147;RPB=0.996017;MQB=1;MQSB=1;BQB=0.999927;MQ0F=0;ICB=1;HOB=0.5;AC=1;AN=2;DP4=22,38,24,43;MQ=20	GT:PL	0/1:149,0,142
Ref_Crab_Transcript_28200_2012	1613	T	G	111	DP=77;VDB=0.796765;SGB=-0.693143;RPB=0.389373;MQB=1;MQSB=1;BQB=0.992949;MQ0F=0;ICB=1;HOB=0.5;AC=1;AN=2;DP4=12,24,17,21;MQ=20	GT:PL	0/1:144,0,140
Ref_Crab_Transcript_28205_412	47	C	G	41.3851	DP=16;VDB=0.00477428;SGB=-0.636426;RPB=1;MQB=1;MQSB=1;BQB=0.477935;MQ0F=0;ICB=1;HOB=0.5;AC=1;AN=2;DP4=4,4,3,4;MQ=20	GT:PL	0/1:74,0,86
Ref_Crab_Transcript_28229_1059	129	C	G	48.8956	DP=13;VDB=0.0462387;SGB=-0.651104;RPB=0.746718;MQB=1;MQSB=1;BQB=0.697274;MQ0F=0;ICB=1;HOB=0.5;AC=1;AN=2;DP4=3,1,6,2;MQ=20	GT:PL	0/1:82,0,37
Ref_Crab_Transcript_28250_875	495	A	T	110	DP=412;VDB=0.620803;SGB=-0.693147;RPB=0.575252;MQB=1;MQSB=1;BQB=0.808939;MQ0F=0;ICB=1;HOB=0.5;AC=1;AN=2;DP4=124,89,96,96;MQ=20	GT:PL	0/1:143,0,151
Ref_Crab_Transcript_28250_875	714	G	A	37.6066	DP=309;VDB=2.17328e-18;SGB=-0.693147;RPB=0.00741405;MQB=7.76353e-07;MQSB=0.34884;BQB=0.120521;MQ0F=0;ICB=1;HOB=0.5;AC=1;AN=2;DP4=78,122,48,58;MQ=24	GT:PL	0/1:71,0,255
Ref_Crab_Transcript_28250_875	787	T	A	106	DP=31;VDB=1.5885e-12;SGB=-0.693021;RPB=0.996101;MQB=0.00632972;MQSB=0.737354;BQB=0.840624;MQ0F=0;ICB=1;HOB=0.5;AC=1;AN=2;DP4=3,1,10,17;MQ=21	GT:PL	0/1:141,0,19
Ref_Crab_Transcript_28250_875	792	T	C	105	DP=31;VDB=1.8752e-12;SGB=-0.692976;RPB=0.995821;MQB=0.00652406;MQSB=0.698777;BQB=0.676188;MQ0F=0;ICB=1;HOB=0.5;AC=1;AN=2;DP4=3,1,9,17;MQ=21	GT:PL	0/1:140,0,21
Ref_Crab_Transcript_28250_875	803	G	A	107	DP=31;VDB=1.71971e-12;SGB=-0.693021;RPB=0.996101;MQB=0.00632972;MQSB=0.737354;BQB=0.939413;MQ0F=0;ICB=1;HOB=0.5;AC=1;AN=2;DP4=3,1,10,17;MQ=21	GT:PL	0/1:141,0,17
Ref_Crab_Transcript_28250_875	808	T	C	107	DP=31;VDB=1.71971e-12;SGB=-0.693021;RPB=0.996101;MQB=0.00632972;MQSB=0.737354;BQB=0.499352;MQ0F=0;ICB=1;HOB=0.5;AC=1;AN=2;DP4=3,1,10,17;MQ=21	GT:PL	0/1:141,0,15
Ref_Crab_Transcript_28250_875	812	T	C	102	DP=31;VDB=1.69726e-12;SGB=-0.692976;RPB=0.995821;MQB=0.00652406;MQSB=0.698777;BQB=0.798368;MQ0F=0;ICB=1;HOB=0.5;AC=1;AN=2;DP4=3,1,9,17;MQ=21	GT:PL	0/1:137,0,22
Ref_Crab_Transcript_28273_1242	667	C	T	83	DP=1998;VDB=0.889701;SGB=-0.693147;RPB=0.794892;MQB=1;MQSB=1;BQB=0.537291;MQ0F=0;ICB=1;HOB=0.5;AC=1;AN=2;DP4=590,504,411,428;MQ=20	GT:PL	0/1:116,0,150
Ref_Crab_Transcript_28298_552	253	T	C	46.2922	DP=12;VDB=0.39697;SGB=-0.636426;RPB=0.506703;MQB=0.95494;MQSB=0.982603;BQB=0.95494;MQ0F=0;ICB=1;HOB=0.5;AC=1;AN=2;DP4=3,2,3,4;MQ=20	GT:PL	0/1:79,0,54
Ref_Crab_Transcript_28364_688	315	G	A	46.72	DP=56;VDB=0.234754;SGB=-0.690438;RPB=0.985143;MQB=1;MQSB=1;BQB=0.257072;MQ0F=0;ICB=1;HOB=0.5;AC=1;AN=2;DP4=18,20,8,9;MQ=20	GT:PL	0/1:80,0,147
Ref_Crab_Transcript_28365_466	126	C	T	45.3945	DP=22;VDB=0.164034;SGB=-0.670168;RPB=0.615112;MQB=1;MQSB=1;BQB=0.900548;MQ0F=0;ICB=1;HOB=0.5;AC=1;AN=2;DP4=8,3,8,2;MQ=20	GT:PL	0/1:78,0,91
Ref_Crab_Transcript_28367_834	683	C	T	43.4044	DP=15;VDB=0.819881;SGB=-0.636426;RPB=0.925999;MQB=0.966012;MQSB=1;BQB=0.0857407;MQ0F=0;ICB=1;HOB=0.5;AC=1;AN=2;DP4=2,5,4,3;MQ=20	GT:PL	0/1:76,0,74
Ref_Crab_Transcript_28387_1342	543	C	T	56	DP=16;VDB=0.122215;SGB=-0.662043;RPB=0.9986;MQB=1;MQSB=1;BQB=0.333524;MQ0F=0;ICB=1;HOB=0.5;AC=1;AN=2;DP4=6,1,6,3;MQ=20	GT:PL	0/1:89,0,59
Ref_Crab_Transcript_28390_1206	1130	C	T	32.3808	DP=13;VDB=0.00100205;SGB=-0.636426;RPB=0.0102252;MQB=0.961166;MQSB=1;BQB=0.470358;MQ0F=0;ICB=1;HOB=0.5;AC=1;AN=2;DP4=2,4,6,1;MQ=20	GT:PL	0/1:65,0,65
Ref_Crab_Transcript_28390_1206	1156	T	C	31.4017	DP=13;VDB=0.0215714;SGB=-0.616816;RPB=0.0169414;MQB=0.982603;MQSB=0.95494;BQB=0.931779;MQ0F=0;ICB=1;HOB=0.5;AC=1;AN=2;DP4=5,1,2,4;MQ=20	GT:PL	0/1:64,0,53
Ref_Crab_Transcript_28392_526	221	G	T	31.2737	DP=18;VDB=0.291224;SGB=-0.636426;RPB=0.817757;MQB=1;MQSB=1;BQB=0.737299;MQ0F=0;ICB=1;HOB=0.5;AC=1;AN=2;DP4=5,5,5,2;MQ=20	GT:PL	0/1:64,0,101
Ref_Crab_Transcript_28397_864	310	T	C	51	DP=38;VDB=0.069114;SGB=-0.683931;RPB=0.934106;MQB=1;MQSB=1;BQB=0.181928;MQ0F=0;ICB=1;HOB=0.5;AC=1;AN=2;DP4=15,10,6,7;MQ=20	GT:PL	0/1:84,0,138
Ref_Crab_Transcript_28406_602	312	A	G	36.1517	DP=23;VDB=0.700218;SGB=-0.651104;RPB=0.989565;MQB=1;MQSB=1;BQB=0.685489;MQ0F=0;ICB=1;HOB=0.5;AC=1;AN=2;DP4=4,9,5,3;MQ=20	GT:PL	0/1:69,0,114
Ref_Crab_Transcript_28422_566	212	G	C	33.3803	DP=13;VDB=0.0493998;SGB=-0.616816;RPB=0.623736;MQB=0.961166;MQSB=0.961166;BQB=0.695312;MQ0F=0;ICB=1;HOB=0.5;AC=1;AN=2;DP4=4,3,3,3;MQ=20	GT:PL	0/1:66,0,78
Ref_Crab_Transcript_28422_566	217	C	T	33.3803	DP=13;VDB=0.0493998;SGB=-0.616816;RPB=0.623736;MQB=0.961166;MQSB=0.961166;BQB=0.920266;MQ0F=0;ICB=1;HOB=0.5;AC=1;AN=2;DP4=4,3,3,3;MQ=20	GT:PL	0/1:66,0,78
Ref_Crab_Transcript_28433_1345	784	C	T	82	DP=16;VDB=0.698506;SGB=-0.680642;RPB=0.471138;MQB=1;MQSB=1;BQB=0.989637;MQ0F=0;ICB=1;HOB=0.5;AC=1;AN=2;DP4=2,1,7,5;MQ=20	GT:PL	0/1:115,0,10
Ref_Crab_Transcript_28462_459	304	T	A	119	DP=256;VDB=0.000110436;SGB=-0.693147;RPB=0.7053;MQB=1;MQSB=1;BQB=0.899534;MQ0F=0;ICB=1;HOB=0.5;AC=1;AN=2;DP4=61,56,64,66;MQ=20	GT:PL	0/1:152,0,141
Ref_Crab_Transcript_28468_1355	665	T	C	54	DP=14;VDB=0.115223;SGB=-0.651104;RPB=0.244551;MQB=1;MQSB=1;BQB=1;MQ0F=0;ICB=1;HOB=0.5;AC=1;AN=2;DP4=3,3,3,5;MQ=20	GT:PL	0/1:87,0,64
Ref_Crab_Transcript_28471_567	181	C	G	35.794	DP=69;VDB=0.178552;SGB=-0.692562;RPB=0.986088;MQB=1;MQSB=1;BQB=0.600001;MQ0F=0;ICB=1;HOB=0.5;AC=1;AN=2;DP4=35,12,16,6;MQ=20	GT:PL	0/1:69,0,118
Ref_Crab_Transcript_28471_567	391	C	T	70	DP=145;VDB=0.882361;SGB=-0.693147;RPB=0.332589;MQB=1;MQSB=1;BQB=0.504173;MQ0F=0;ICB=1;HOB=0.5;AC=1;AN=2;DP4=26,64,12,41;MQ=20	GT:PL	0/1:103,0,152
Ref_Crab_Transcript_28471_567	517	A	T	33.406	DP=14;VDB=0.0396485;SGB=-0.636426;RPB=0.966012;MQB=0.966012;MQSB=1;BQB=0.948864;MQ0F=0;ICB=1;HOB=0.5;AC=1;AN=2;DP4=2,5,1,6;MQ=20	GT:PL	0/1:66,0,74
Ref_Crab_Transcript_28475_583	526	T	C	58	DP=29;VDB=0.0206746;SGB=-0.680642;RPB=0.965321;MQB=1;MQSB=1;BQB=0.595337;MQ0F=0;ICB=1;HOB=0.5;AC=1;AN=2;DP4=8,9,5,7;MQ=20	GT:PL	0/1:91,0,130
Ref_Crab_Transcript_28493_874	62	C	T	42.2821	DP=12;VDB=0.293704;SGB=-0.636426;RPB=0.40926;MQB=0.95494;MQSB=0.95494;BQB=0.95494;MQ0F=0;ICB=1;HOB=0.5;AC=1;AN=2;DP4=2,3,5,2;MQ=20	GT:PL	0/1:75,0,55
Ref_Crab_Transcript_28493_874	64	T	G	42.2821	DP=12;VDB=0.274147;SGB=-0.636426;RPB=0.40926;MQB=0.95494;MQSB=0.95494;BQB=0.95494;MQ0F=0;ICB=1;HOB=0.5;AC=1;AN=2;DP4=2,3,5,2;MQ=20	GT:PL	0/1:75,0,55
Ref_Crab_Transcript_28513_368	266	T	C	65	DP=15;VDB=0.0195328;SGB=-0.662043;RPB=0.83527;MQB=1;MQSB=1;BQB=0.923116;MQ0F=0;ICB=1;HOB=0.5;AC=1;AN=2;DP4=2,3,4,5;MQ=20	GT:PL	0/1:98,0,49
Ref_Crab_Transcript_28513_368	286	C	T	57	DP=11;VDB=0.0330611;SGB=-0.651104;RPB=0.0497871;MQB=1;MQSB=0.964642;BQB=0.979382;MQ0F=0;ICB=1;HOB=0.5;AC=1;AN=2;DP4=0,3,4,4;MQ=20	GT:PL	0/1:90,0,20
Ref_Crab_Transcript_28531_607	304	A	G	59	DP=20;VDB=0.216733;SGB=-0.670168;RPB=0.832887;MQB=1;MQSB=1;BQB=0.685328;MQ0F=0;ICB=1;HOB=0.5;AC=1;AN=2;DP4=4,6,3,7;MQ=20	GT:PL	0/1:92,0,95
Ref_Crab_Transcript_28533_360	199	T	C	41.3851	DP=15;VDB=0.487912;SGB=-0.636426;RPB=0.546428;MQB=1;MQSB=1;BQB=0.444739;MQ0F=0;ICB=1;HOB=0.5;AC=1;AN=2;DP4=4,4,3,4;MQ=20	GT:PL	0/1:74,0,86
Ref_Crab_Transcript_28549_748	222	G	C	86	DP=72;VDB=0.961213;SGB=-0.693054;RPB=0.0854863;MQB=1;MQSB=1;BQB=0.941356;MQ0F=0;ICB=1;HOB=0.5;AC=1;AN=2;DP4=25,17,12,16;MQ=20	GT:PL	0/1:119,0,140
Ref_Crab_Transcript_28575_1173	617	C	A	56	DP=16;VDB=0.26558;SGB=-0.662043;RPB=0.965592;MQB=1;MQSB=1;BQB=0.729697;MQ0F=0;ICB=1;HOB=0.5;AC=1;AN=2;DP4=2,5,6,3;MQ=20	GT:PL	0/1:89,0,69
Ref_Crab_Transcript_28576_309	121	C	T	38.3688	DP=11;VDB=0.5;SGB=-0.616816;RPB=0.475476;MQB=0.950952;MQSB=0.964642;BQB=0.8618;MQ0F=0;ICB=1;HOB=0.5;AC=1;AN=2;DP4=4,1,3,3;MQ=20	GT:PL	0/1:71,0,52
Ref_Crab_Transcript_28579_1181	187	C	A	40.3913	DP=13;VDB=0.274147;SGB=-0.636426;RPB=0.920266;MQB=0.961166;MQSB=1;BQB=0.623736;MQ0F=0;ICB=1;HOB=0.5;AC=1;AN=2;DP4=4,2,4,3;MQ=20	GT:PL	0/1:73,0,63
Ref_Crab_Transcript_28595_353	275	G	T	47.9076	DP=260;VDB=0;SGB=-0.693147;RPB=0.0662811;MQB=1;MQSB=1;BQB=1.27857e-07;MQ0F=0;ICB=1;HOB=0.5;AC=1;AN=2;DP4=51,20,128,18;MQ=20	GT:PL	0/1:81,0,42
Ref_Crab_Transcript_28595_353	280	G	T	80	DP=259;VDB=0;SGB=-0.693147;RPB=0.0342922;MQB=1;MQSB=1;BQB=0.010374;MQ0F=0;ICB=1;HOB=0.5;AC=1;AN=2;DP4=65,14,97,22;MQ=20	GT:PL	0/1:113,0,79
Ref_Crab_Transcript_28595_353	300	G	T	59	DP=253;VDB=0;SGB=-0.693147;RPB=0.0395678;MQB=1;MQSB=1;BQB=2.20048e-15;MQ0F=0;ICB=1;HOB=0.5;AC=1;AN=2;DP4=48,11,97,24;MQ=20	GT:PL	0/1:92,0,36
Ref_Crab_Transcript_28595_353	305	G	T	54	DP=253;VDB=0;SGB=-0.693147;RPB=0.00193216;MQB=1;MQSB=1;BQB=1.41747e-06;MQ0F=0;ICB=1;HOB=0.5;AC=1;AN=2;DP4=39,9,86,21;MQ=20	GT:PL	0/1:87,0,32
Ref_Crab_Transcript_28595_353	325	G	T	69	DP=253;VDB=6.40123e-36;SGB=-0.693147;RPB=0.998684;MQB=1;MQSB=1;BQB=1.32014e-08;MQ0F=0;ICB=1;HOB=0.5;AC=1;AN=2;DP4=48,15,67,12;MQ=20	GT:PL	0/1:102,0,104
Ref_Crab_Transcript_28595_353	330	G	T	39.4555	DP=253;VDB=0;SGB=-0.693147;RPB=0.00450851;MQB=1;MQSB=1;BQB=7.45556e-06;MQ0F=0;ICB=-;HOB=-;AC=2;AN=2;DP4=21,8,88,18;MQ=20	GT:PL	1/1:67,29,0
Ref_Crab_Transcript_28607_1184	940	G	A	83	DP=35;VDB=0.028549;SGB=-0.689466;RPB=0.630132;MQB=1;MQSB=1;BQB=0.894963;MQ0F=0;ICB=1;HOB=0.5;AC=1;AN=2;DP4=6,10,5,11;MQ=20	GT:PL	0/1:116,0,119
Ref_Crab_Transcript_28654_1089	6	T	A	108	DP=16;VDB=2.0439e-06;SGB=-0.680642;RPB=-;MQB=-;MQSB=1;BQB=-;MQ0F=0;ICB=-;HOB=-;AC=2;AN=2;DP4=0,0,2,10;MQ=20	GT:PL	1/1:135,36,0
Ref_Crab_Transcript_28655_787	532	C	T	63	DP=14;VDB=0.369599;SGB=-0.662043;RPB=0.980199;MQB=1;MQSB=1;BQB=0.375311;MQ0F=0;ICB=1;HOB=0.5;AC=1;AN=2;DP4=2,3,3,6;MQ=20	GT:PL	0/1:96,0,49
Ref_Crab_Transcript_28661_347	94	C	T	49.3148	DP=23;VDB=0.443438;SGB=-0.662043;RPB=1;MQB=1;MQSB=1;BQB=0.523895;MQ0F=0;ICB=1;HOB=0.5;AC=1;AN=2;DP4=11,1,5,4;MQ=20	GT:PL	0/1:82,0,76
Ref_Crab_Transcript_28673_525	243	T	C	105	DP=36;VDB=0.329521;SGB=-0.692562;RPB=0.366542;MQB=1;MQSB=1;BQB=0.25391;MQ0F=0;ICB=1;HOB=0.5;AC=1;AN=2;DP4=7,6,12,10;MQ=20	GT:PL	0/1:138,0,90
Ref_Crab_Transcript_28691_422	293	C	T	47.07	DP=11;VDB=0.768686;SGB=-0.636426;RPB=0.803868;MQB=0.964642;MQSB=1;BQB=0.12058;MQ0F=0;ICB=1;HOB=0.5;AC=1;AN=2;DP4=1,3,2,5;MQ=20	GT:PL	0/1:80,0,40
Ref_Crab_Transcript_28704_549	323	A	G	58	DP=44;VDB=0.182506;SGB=-0.690438;RPB=0.995426;MQB=1;MQSB=1;BQB=0.259918;MQ0F=0;ICB=1;HOB=0.5;AC=1;AN=2;DP4=15,8,13,4;MQ=20	GT:PL	0/1:91,0,128
Ref_Crab_Transcript_28713_494	359	C	G	64	DP=15;VDB=0.178328;SGB=-0.670168;RPB=0.728422;MQB=1;MQSB=1;BQB=0.728422;MQ0F=0;ICB=1;HOB=0.5;AC=1;AN=2;DP4=2,3,4,6;MQ=20	GT:PL	0/1:97,0,46
Ref_Crab_Transcript_28724_505	3	G	A	31.3878	DP=21;VDB=6.71664e-05;SGB=-0.636426;RPB=0.921243;MQB=1;MQSB=1;BQB=0.816632;MQ0F=0;ICB=1;HOB=0.5;AC=1;AN=2;DP4=4,4,1,6;MQ=20	GT:PL	0/1:64,0,86
Ref_Crab_Transcript_28739_345	310	C	T	124	DP=24;VDB=8.76545e-08;SGB=-0.692352;RPB=0.547619;MQB=1;MQSB=1;BQB=0.904762;MQ0F=0;ICB=-;HOB=-;AC=2;AN=2;DP4=1,1,5,16;MQ=20	GT:PL	1/1:151,29,0
Ref_Crab_Transcript_28739_345	317	C	T	143	DP=24;VDB=1.09333e-07;SGB=-0.692717;RPB=1;MQB=1;MQSB=1;BQB=1;MQ0F=0;ICB=-;HOB=-;AC=2;AN=2;DP4=0,1,6,17;MQ=20	GT:PL	1/1:170,52,0
Ref_Crab_Transcript_28739_345	320	C	T	103	DP=21;VDB=1.28927e-06;SGB=-0.690438;RPB=0.844127;MQB=1;MQSB=1;BQB=0.991017;MQ0F=0;ICB=1;HOB=0.5;AC=1;AN=2;DP4=0,4,6,11;MQ=20	GT:PL	0/1:134,0,6
Ref_Crab_Transcript_28739_345	332	G	C	40.3662	DP=15;VDB=0.00150379;SGB=-0.636426;RPB=0.899815;MQB=0.961166;MQSB=0.961166;BQB=0.695312;MQ0F=0;ICB=1;HOB=0.5;AC=1;AN=2;DP4=1,5,5,2;MQ=20	GT:PL	0/1:73,0,57
Ref_Crab_Transcript_28766_516	163	G	T	40.2911	DP=26;VDB=0.869789;SGB=-0.676189;RPB=0.723562;MQB=1;MQSB=1;BQB=0.952672;MQ0F=0;ICB=1;HOB=0.5;AC=1;AN=2;DP4=9,6,9,2;MQ=20	GT:PL	0/1:73,0,118
Ref_Crab_Transcript_28768_317	171	T	C	37.3689	DP=12;VDB=0.0229453;SGB=-0.616816;RPB=0.950952;MQB=0.950952;MQSB=0.950952;BQB=0.683497;MQ0F=0;ICB=1;HOB=0.5;AC=1;AN=2;DP4=3,2,2,4;MQ=20	GT:PL	0/1:70,0,57
Ref_Crab_Transcript_28782_569	447	T	G	55	DP=32;VDB=0.637461;SGB=-0.680642;RPB=0.904666;MQB=1;MQSB=1;BQB=0.0890666;MQ0F=0;ICB=1;HOB=0.5;AC=1;AN=2;DP4=10,10,5,7;MQ=20	GT:PL	0/1:88,0,135
Ref_Crab_Transcript_28800_567	453	T	C	68	DP=16;VDB=2.7054e-06;SGB=-0.670168;RPB=0.00920968;MQB=0.472367;MQSB=0.569783;BQB=0.0767751;MQ0F=0;ICB=1;HOB=0.5;AC=1;AN=2;DP4=3,2,3,7;MQ=21	GT:PL	0/1:101,0,60
Ref_Crab_Transcript_28800_567	479	T	C	38.2596	DP=16;VDB=0.000823797;SGB=-0.636426;RPB=0.217575;MQB=0.539212;MQSB=0.749585;BQB=0.987474;MQ0F=0;ICB=1;HOB=0.5;AC=1;AN=2;DP4=2,7,4,3;MQ=21	GT:PL	0/1:71,0,102
Ref_Crab_Transcript_28806_314	47	A	G	67	DP=13;VDB=0.0538244;SGB=-0.662043;RPB=0.988166;MQB=1;MQSB=0.961166;BQB=0.423112;MQ0F=0;ICB=1;HOB=0.5;AC=1;AN=2;DP4=2,2,4,5;MQ=20	GT:PL	0/1:100,0,37
Ref_Crab_Transcript_28806_314	62	A	G	90	DP=16;VDB=0.0525953;SGB=-0.683931;RPB=0.760518;MQB=1;MQSB=1;BQB=0.19218;MQ0F=0;ICB=1;HOB=0.5;AC=1;AN=2;DP4=1,2,6,7;MQ=20	GT:PL	0/1:123,0,10
Ref_Crab_Transcript_28806_314	79	C	T	92	DP=24;VDB=0.350411;SGB=-0.690438;RPB=0.987474;MQB=1;MQSB=1;BQB=0.298022;MQ0F=0;ICB=1;HOB=0.5;AC=1;AN=2;DP4=4,3,10,7;MQ=20	GT:PL	0/1:125,0,50
Ref_Crab_Transcript_28806_314	104	A	G	100	DP=29;VDB=0.582226;SGB=-0.691153;RPB=0.998458;MQB=1;MQSB=1;BQB=0.352322;MQ0F=0;ICB=1;HOB=0.5;AC=1;AN=2;DP4=3,5,10,8;MQ=20	GT:PL	0/1:133,0,55
Ref_Crab_Transcript_28806_314	111	T	A	38.1319	DP=27;VDB=0.652509;SGB=-0.680642;RPB=0.380236;MQB=1;MQSB=1;BQB=0.917583;MQ0F=0;ICB=1;HOB=0.5;AC=1;AN=2;DP4=8,7,6,6;MQ=20	GT:PL	0/1:71,0,116
Ref_Crab_Transcript_28806_314	129	G	T	156	DP=23;VDB=0.0250585;SGB=-0.692352;RPB=-;MQB=-;MQSB=1;BQB=-;MQ0F=0;ICB=-;HOB=-;AC=2;AN=2;DP4=0,0,12,9;MQ=20	GT:PL	1/1:183,63,0
Ref_Crab_Transcript_28806_314	135	G	A	53	DP=25;VDB=0.205475;SGB=-0.670168;RPB=0.517796;MQB=1;MQSB=1;BQB=0.775438;MQ0F=0;ICB=1;HOB=0.5;AC=1;AN=2;DP4=8,5,6,4;MQ=20	GT:PL	0/1:86,0,108
Ref_Crab_Transcript_28806_314	144	G	A	51	DP=25;VDB=0.677213;SGB=-0.676189;RPB=0.0586869;MQB=1;MQSB=1;BQB=0.970111;MQ0F=0;ICB=1;HOB=0.5;AC=1;AN=2;DP4=8,6,8,3;MQ=20	GT:PL	0/1:84,0,116
Ref_Crab_Transcript_28827_569	289	A	G	59	DP=12;VDB=0.0576189;SGB=-0.651104;RPB=0.072179;MQB=1;MQSB=0.95494;BQB=0.493254;MQ0F=0;ICB=1;HOB=0.5;AC=1;AN=2;DP4=1,3,4,4;MQ=20	GT:PL	0/1:92,0,38
Ref_Crab_Transcript_28849_339	153	A	G	73	DP=222;VDB=0.0178298;SGB=-0.693147;RPB=0.89676;MQB=1;MQSB=1;BQB=0.998773;MQ0F=0;ICB=1;HOB=0.5;AC=1;AN=2;DP4=58,71,51,37;MQ=20	GT:PL	0/1:106,0,150
Ref_Crab_Transcript_28859_1251	146	T	A	90	DP=77;VDB=0.901384;SGB=-0.69312;RPB=0.975295;MQB=1;MQSB=1;BQB=0.433507;MQ0F=0;ICB=1;HOB=0.5;AC=1;AN=2;DP4=26,16,17,15;MQ=20	GT:PL	0/1:123,0,137
Ref_Crab_Transcript_28859_1251	147	A	C	95	DP=78;VDB=0.934055;SGB=-0.693127;RPB=0.999302;MQB=1;MQSB=1;BQB=0.669038;MQ0F=0;ICB=1;HOB=0.5;AC=1;AN=2;DP4=26,16,17,16;MQ=20	GT:PL	0/1:128,0,137
Ref_Crab_Transcript_28859_1251	280	T	A	39.58	DP=72;VDB=0.279998;SGB=-0.692352;RPB=0.998447;MQB=1;MQSB=1;BQB=0.915106;MQ0F=0;ICB=1;HOB=0.5;AC=1;AN=2;DP4=32,19,9,12;MQ=20	GT:PL	0/1:73,0,128
Ref_Crab_Transcript_28870_313	105	T	G	47.0752	DP=11;VDB=0.757552;SGB=-0.636426;RPB=0.562708;MQB=0.964642;MQSB=1;BQB=0.924449;MQ0F=0;ICB=1;HOB=0.5;AC=1;AN=2;DP4=0,4,2,5;MQ=20	GT:PL	0/1:80,0,33
Ref_Crab_Transcript_28876_339	293	G	A	63	DP=10;VDB=0.00524106;SGB=-0.651104;RPB=0.25;MQB=1;MQSB=1.00775;BQB=0.125;MQ0F=0;ICB=1;HOB=0.5;AC=1;AN=2;DP4=2,0,4,4;MQ=20	GT:PL	0/1:95,0,8
Ref_Crab_Transcript_28876_339	306	C	T	63	DP=10;VDB=0.00524106;SGB=-0.651104;RPB=0.25;MQB=1;MQSB=1.00775;BQB=0.5;MQ0F=0;ICB=1;HOB=0.5;AC=1;AN=2;DP4=2,0,4,4;MQ=20	GT:PL	0/1:95,0,8
Ref_Crab_Transcript_28882_565	153	T	A	98	DP=100;VDB=0.35425;SGB=-0.693147;RPB=0.841948;MQB=1;MQSB=1;BQB=0.639194;MQ0F=0;ICB=1;HOB=0.5;AC=1;AN=2;DP4=31,14,32,17;MQ=20	GT:PL	0/1:131,0,122
Ref_Crab_Transcript_28923_590	395	C	T	41.9282	DP=10;VDB=0.52412;SGB=-0.616816;RPB=0.924584;MQB=0.924584;MQSB=0.974597;BQB=0.809011;MQ0F=0;ICB=1;HOB=0.5;AC=1;AN=2;DP4=3,0,2,4;MQ=20	GT:PL	0/1:75,0,26
Ref_Crab_Transcript_28927_380	280	T	C	39.2975	DP=17;VDB=0.215372;SGB=-0.636426;RPB=0.252539;MQB=0.887766;MQSB=0.943335;BQB=0.621145;MQ0F=0;ICB=1;HOB=0.5;AC=1;AN=2;DP4=5,5,2,5;MQ=20	GT:PL	0/1:72,0,102
Ref_Crab_Transcript_28949_524	59	T	G	93	DP=47;VDB=0.00101901;SGB=-0.692831;RPB=0.0224243;MQB=1;MQSB=1;BQB=0.962453;MQ0F=0;ICB=1;HOB=0.5;AC=1;AN=2;DP4=15,8,15,9;MQ=20	GT:PL	0/1:126,0,119
Ref_Crab_Transcript_28960_844	797	T	C	47.1248	DP=16;VDB=0.0160923;SGB=-0.670168;RPB=0.37005;MQB=1;MQSB=1;BQB=0.522814;MQ0F=0;ICB=1;HOB=0.5;AC=1;AN=2;DP4=0,6,1,9;MQ=20	GT:PL	0/1:80,0,42
Ref_Crab_Transcript_28960_844	804	A	T	46.0372	DP=14;VDB=0.00299887;SGB=-0.662043;RPB=0.375311;MQB=1;MQSB=1;BQB=0.726149;MQ0F=0;ICB=1;HOB=0.5;AC=1;AN=2;DP4=0,5,1,8;MQ=20	GT:PL	0/1:79,0,37
Ref_Crab_Transcript_28969_330	84	T	C	40.3788	DP=14;VDB=0.604698;SGB=-0.636426;RPB=0.623736;MQB=0.961166;MQSB=1;BQB=0.899815;MQ0F=0;ICB=1;HOB=0.5;AC=1;AN=2;DP4=3,3,5,2;MQ=20	GT:PL	0/1:73,0,66
Ref_Crab_Transcript_28969_330	106	G	T	48.1667	DP=13;VDB=0.473837;SGB=-0.651104;RPB=0.187475;MQB=1;MQSB=1;BQB=0.976181;MQ0F=0;ICB=1;HOB=0.5;AC=1;AN=2;DP4=2,3,6,2;MQ=20	GT:PL	0/1:81,0,52
Ref_Crab_Transcript_28980_816	151	C	T	72	DP=126;VDB=0.0697737;SGB=-0.693147;RPB=0.82656;MQB=1;MQSB=1;BQB=0.799557;MQ0F=0;ICB=1;HOB=0.5;AC=1;AN=2;DP4=39,30,39,14;MQ=20	GT:PL	0/1:105,0,141
Ref_Crab_Transcript_29017_753	193	G	T	108	DP=209;VDB=0.353337;SGB=-0.693147;RPB=0.979885;MQB=1;MQSB=1;BQB=8.157e-05;MQ0F=0;ICB=1;HOB=0.5;AC=1;AN=2;DP4=59,36,62,44;MQ=20	GT:PL	0/1:141,0,130
Ref_Crab_Transcript_29042_305	24	A	G	36.8789	DP=46;VDB=4.31955e-15;SGB=-0.693127;RPB=0.923672;MQB=1;MQSB=1;BQB=0.851467;MQ0F=0;ICB=1;HOB=0.5;AC=1;AN=2;DP4=7,2,30,3;MQ=20	GT:PL	0/1:71,0,20
Ref_Crab_Transcript_29042_305	42	T	C	50	DP=53;VDB=3.75294e-06;SGB=-0.692831;RPB=0.0307153;MQB=1;MQSB=1;BQB=0.0433593;MQ0F=0;ICB=1;HOB=0.5;AC=1;AN=2;DP4=23,1,21,3;MQ=20	GT:PL	0/1:83,0,66
Ref_Crab_Transcript_29042_305	43	G	C	40.0713	DP=53;VDB=7.36701e-10;SGB=-0.693145;RPB=0.996234;MQB=1;MQSB=1;BQB=0.00321598;MQ0F=0;ICB=1;HOB=0.5;AC=1;AN=2;DP4=10,2,36,4;MQ=20	GT:PL	0/1:74,0,23
Ref_Crab_Transcript_29042_305	49	A	G	54	DP=55;VDB=1.642e-08;SGB=-0.693146;RPB=0.649686;MQB=1;MQSB=1;BQB=0.995697;MQ0F=0;ICB=-;HOB=-;AC=2;AN=2;DP4=9,1,36,6;MQ=20	GT:PL	1/1:81,3,0
Ref_Crab_Transcript_29042_305	76	T	C	40.4018	DP=64;VDB=4.5852e-09;SGB=-0.693054;RPB=5.64008e-06;MQB=1;MQSB=1;BQB=0.226279;MQ0F=0;ICB=1;HOB=0.5;AC=1;AN=2;DP4=19,10,26,2;MQ=20	GT:PL	0/1:73,0,127
Ref_Crab_Transcript_29042_305	80	T	C	47.3996	DP=65;VDB=8.77115e-13;SGB=-0.69311;RPB=2.3137e-07;MQB=1;MQSB=1;BQB=0.833001;MQ0F=0;ICB=1;HOB=0.5;AC=1;AN=2;DP4=23,10,28,3;MQ=20	GT:PL	0/1:80,0,124
Ref_Crab_Transcript_29045_487	393	C	T	95	DP=11;VDB=0.032944;SGB=-0.670168;RPB=1;MQB=1;MQSB=0.950952;BQB=1;MQ0F=0;ICB=-;HOB=-;AC=2;AN=2;DP4=0,1,5,5;MQ=20	GT:PL	1/1:122,13,0
Ref_Crab_Transcript_29051_499	355	T	C	121	DP=42;VDB=0.0442247;SGB=-0.693079;RPB=0.0379461;MQB=0.100005;MQSB=0.59982;BQB=0.942759;MQ0F=0;ICB=1;HOB=0.5;AC=1;AN=2;DP4=2,7,8,21;MQ=22	GT:PL	0/1:154,0,79
Ref_Crab_Transcript_29053_920	142	G	C	57	DP=28;VDB=0.479045;SGB=-0.680642;RPB=1;MQB=1;MQSB=1;BQB=0.163422;MQ0F=0;ICB=1;HOB=0.5;AC=1;AN=2;DP4=7,9,8,4;MQ=20	GT:PL	0/1:90,0,126
Ref_Crab_Transcript_29083_873	500	G	A	33.6204	DP=120;VDB=0.0124161;SGB=-0.693136;RPB=0.985509;MQB=1;MQSB=1;BQB=0.876893;MQ0F=0;ICB=1;HOB=0.5;AC=1;AN=2;DP4=42,41,14,21;MQ=20	GT:PL	0/1:67,0,124
Ref_Crab_Transcript_29089_1107	142	C	T	108	DP=146;VDB=0.501347;SGB=-0.693147;RPB=0.755414;MQB=1;MQSB=1;BQB=0.880689;MQ0F=0;ICB=1;HOB=0.5;AC=1;AN=2;DP4=42,27,37,36;MQ=20	GT:PL	0/1:141,0,130
Ref_Crab_Transcript_29098_1250	694	A	T	30.391	DP=13;VDB=0.12166;SGB=-0.616816;RPB=0.112477;MQB=0.961166;MQSB=1;BQB=0.920266;MQ0F=0;ICB=1;HOB=0.5;AC=1;AN=2;DP4=1,6,4,2;MQ=20	GT:PL	0/1:63,0,66
Ref_Crab_Transcript_29116_1329	407	C	T	83	DP=89;VDB=0.18254;SGB=-0.693132;RPB=0.82667;MQB=1;MQSB=1;BQB=0.907204;MQ0F=0;ICB=1;HOB=0.5;AC=1;AN=2;DP4=22,32,14,20;MQ=20	GT:PL	0/1:116,0,148
Ref_Crab_Transcript_29124_365	105	A	G	81	DP=13;VDB=0.00682076;SGB=-0.676189;RPB=0.136364;MQB=0.5;MQSB=0.828239;BQB=0.636364;MQ0F=0;ICB=1;HOB=0.5;AC=1;AN=2;DP4=1,1,6,5;MQ=20	GT:PL	0/1:113,0,8
Ref_Crab_Transcript_29124_365	106	G	A	81	DP=13;VDB=0.00682076;SGB=-0.676189;RPB=0.136364;MQB=0.5;MQSB=0.828239;BQB=1;MQ0F=0;ICB=1;HOB=0.5;AC=1;AN=2;DP4=1,1,6,5;MQ=20	GT:PL	0/1:113,0,8
Ref_Crab_Transcript_29136_385	253	C	T	69	DP=23;VDB=0.926609;SGB=-0.683931;RPB=0.825053;MQB=1;MQSB=1;BQB=0.0948205;MQ0F=0;ICB=1;HOB=0.5;AC=1;AN=2;DP4=6,4,3,10;MQ=20	GT:PL	0/1:102,0,86
Ref_Crab_Transcript_29175_1065	845	C	T	36.4051	DP=12;VDB=0.544728;SGB=-0.616816;RPB=0.931779;MQB=0.982603;MQSB=0.95494;BQB=0.372712;MQ0F=0;ICB=1;HOB=0.5;AC=1;AN=2;DP4=4,2,3,3;MQ=20	GT:PL	0/1:69,0,66
Ref_Crab_Transcript_29182_369	77	C	T	33.7625	DP=33;VDB=0.855481;SGB=-0.670168;RPB=0.682478;MQB=1;MQSB=1;BQB=0.965685;MQ0F=0;ICB=1;HOB=0.5;AC=1;AN=2;DP4=10,12,4,6;MQ=20	GT:PL	0/1:67,0,141
Ref_Crab_Transcript_29182_369	78	C	A	33.7477	DP=33;VDB=0.855481;SGB=-0.670168;RPB=0.682478;MQB=1;MQSB=1;BQB=0.830315;MQ0F=0;ICB=1;HOB=0.5;AC=1;AN=2;DP4=10,12,4,6;MQ=20	GT:PL	0/1:67,0,143
Ref_Crab_Transcript_29182_369	107	C	T	105	DP=28;VDB=0.0488886;SGB=-0.692352;RPB=0.856268;MQB=1;MQSB=1;BQB=0.358424;MQ0F=0;ICB=1;HOB=0.5;AC=1;AN=2;DP4=0,7,8,13;MQ=20	GT:PL	0/1:139,0,22
Ref_Crab_Transcript_29216_690	554	T	G	58	DP=46;VDB=0.0461546;SGB=-0.683931;RPB=0.980953;MQB=0.652206;MQSB=0.64735;BQB=0.910019;MQ0F=0;ICB=1;HOB=0.5;AC=1;AN=2;DP4=11,17,7,6;MQ=22	GT:PL	0/1:91,0,187
Ref_Crab_Transcript_29216_690	622	C	A	118	DP=37;VDB=0.00012537;SGB=-0.691153;RPB=0.522814;MQB=0.000910542;MQSB=0.986948;BQB=0.610009;MQ0F=0;ICB=1;HOB=0.5;AC=1;AN=2;DP4=10,5,7,11;MQ=24	GT:PL	0/1:151,0,176
Ref_Crab_Transcript_29216_690	623	G	T	117	DP=37;VDB=0.00012537;SGB=-0.691153;RPB=0.522814;MQB=0.000910542;MQSB=0.986948;BQB=0.642859;MQ0F=0;ICB=1;HOB=0.5;AC=1;AN=2;DP4=10,5,7,11;MQ=24	GT:PL	0/1:150,0,173
Ref_Crab_Transcript_29216_690	625	C	T	119	DP=34;VDB=0.000129822;SGB=-0.691153;RPB=0.297351;MQB=0.000735465;MQSB=0.970439;BQB=0.288631;MQ0F=0;ICB=1;HOB=0.5;AC=1;AN=2;DP4=9,5,7,11;MQ=24	GT:PL	0/1:152,0,169
Ref_Crab_Transcript_29219_472	55	G	C	34.3822	DP=14;VDB=0.0552398;SGB=-0.636426;RPB=0.777113;MQB=0.961166;MQSB=1;BQB=0.961166;MQ0F=0;ICB=1;HOB=0.5;AC=1;AN=2;DP4=5,1,6,1;MQ=20	GT:PL	0/1:67,0,57
Ref_Crab_Transcript_29230_332	77	G	A	41.782	DP=10;VDB=0.274147;SGB=-0.636426;RPB=0.916482;MQB=0.916482;MQSB=0.916482;BQB=0.0916482;MQ0F=0;ICB=1;HOB=0.5;AC=1;AN=2;DP4=1,2,2,5;MQ=20	GT:PL	0/1:75,0,28
Ref_Crab_Transcript_29230_332	95	G	A	51	DP=12;VDB=0.759801;SGB=-0.636426;RPB=0.733186;MQB=0.916482;MQSB=1.00775;BQB=0.458241;MQ0F=0;ICB=1;HOB=0.5;AC=1;AN=2;DP4=2,1,4,3;MQ=20	GT:PL	0/1:84,0,28
Ref_Crab_Transcript_29230_332	110	C	A	59	DP=12;VDB=0.948177;SGB=-0.662043;RPB=0.432745;MQB=1;MQSB=1;BQB=0.432745;MQ0F=0;ICB=1;HOB=0.5;AC=1;AN=2;DP4=2,1,6,3;MQ=20	GT:PL	0/1:93,0,22
Ref_Crab_Transcript_29244_629	540	C	T	30.5123	DP=77;VDB=0.888701;SGB=-0.692352;RPB=0.94895;MQB=1;MQSB=1;BQB=0.906286;MQ0F=0;ICB=1;HOB=0.5;AC=1;AN=2;DP4=21,32,6,15;MQ=20	GT:PL	0/1:64,0,143
Ref_Crab_Transcript_29252_441	295	C	T	46.3504	DP=20;VDB=0.327269;SGB=-0.651104;RPB=0.298531;MQB=1;MQSB=1;BQB=0.72634;MQ0F=0;ICB=1;HOB=0.5;AC=1;AN=2;DP4=0,10,4,4;MQ=20	GT:PL	0/1:79,0,61
Ref_Crab_Transcript_29271_423	301	C	A	49.07	DP=11;VDB=0.155866;SGB=-0.636426;RPB=0.763675;MQB=0.964642;MQSB=0.950952;BQB=0.964642;MQ0F=0;ICB=1;HOB=0.5;AC=1;AN=2;DP4=1,3,4,3;MQ=20	GT:PL	0/1:82,0,40
Ref_Crab_Transcript_29283_1529	1445	A	T	54	DP=87;VDB=0.158099;SGB=-0.693054;RPB=0.985211;MQB=1;MQSB=1;BQB=0.453076;MQ0F=0;ICB=1;HOB=0.5;AC=1;AN=2;DP4=12,47,10,18;MQ=20	GT:PL	0/1:87,0,145
Ref_Crab_Transcript_29321_430	124	T	A	54	DP=13;VDB=0.787992;SGB=-0.651104;RPB=0.679965;MQB=1;MQSB=1;BQB=0.591555;MQ0F=0;ICB=1;HOB=0.5;AC=1;AN=2;DP4=3,2,5,3;MQ=20	GT:PL	0/1:87,0,48
Ref_Crab_Transcript_29321_430	234	G	C	60	DP=11;VDB=0.29154;SGB=-0.651104;RPB=0.829029;MQB=1;MQSB=0.950952;BQB=0.994805;MQ0F=0;ICB=1;HOB=0.5;AC=1;AN=2;DP4=1,2,4,4;MQ=20	GT:PL	0/1:94,0,25
Ref_Crab_Transcript_29337_609	557	T	C	48.9553	DP=11;VDB=0.044843;SGB=-0.636426;RPB=0.442128;MQB=0.964642;MQSB=0.950952;BQB=0.924449;MQ0F=0;ICB=1;HOB=0.5;AC=1;AN=2;DP4=2,2,4,3;MQ=20	GT:PL	0/1:82,0,36
Ref_Crab_Transcript_29342_465	166	T	C	38.3687	DP=11;VDB=0.530999;SGB=-0.616816;RPB=0.564628;MQB=0.950952;MQSB=0.950952;BQB=0.148586;MQ0F=0;ICB=1;HOB=0.5;AC=1;AN=2;DP4=3,2,3,3;MQ=20	GT:PL	0/1:71,0,57
Ref_Crab_Transcript_29365_1157	827	C	T	43.9742	DP=32;VDB=0.915271;SGB=-0.676189;RPB=0.847482;MQB=1;MQSB=1;BQB=0.950874;MQ0F=0;ICB=1;HOB=0.5;AC=1;AN=2;DP4=7,14,6,5;MQ=20	GT:PL	0/1:77,0,135
Ref_Crab_Transcript_29369_1008	710	G	A	52	DP=15;VDB=0.862072;SGB=-0.662043;RPB=0.118179;MQB=1;MQSB=1;BQB=0.923116;MQ0F=0;ICB=1;HOB=0.5;AC=1;AN=2;DP4=1,4,7,2;MQ=20	GT:PL	0/1:85,0,46
Ref_Crab_Transcript_29378_533	89	T	C	41.7968	DP=10;VDB=0.822449;SGB=-0.616816;RPB=0.924584;MQB=0.924584;MQSB=0.924584;BQB=0.231146;MQ0F=0;ICB=1;HOB=0.5;AC=1;AN=2;DP4=1,2,2,4;MQ=20	GT:PL	0/1:75,0,26
Ref_Crab_Transcript_29410_363	269	A	G	123	DP=15;VDB=0.108008;SGB=-0.686358;RPB=1;MQB=1;MQSB=1;BQB=1;MQ0F=0;ICB=-;HOB=-;AC=2;AN=2;DP4=0,1,7,7;MQ=20	GT:PL	1/1:150,25,0
Ref_Crab_Transcript_29410_363	283	T	A	110	DP=13;VDB=0.00589533;SGB=-0.680642;RPB=1;MQB=1;MQSB=0.961166;BQB=1;MQ0F=0;ICB=-;HOB=-;AC=2;AN=2;DP4=0,1,6,6;MQ=20	GT:PL	1/1:137,19,0
Ref_Crab_Transcript_29459_803	167	G	C	55	DP=14;VDB=0.674881;SGB=-0.651104;RPB=0.967216;MQB=1;MQSB=0.966012;BQB=0.195278;MQ0F=0;ICB=1;HOB=0.5;AC=1;AN=2;DP4=3,3,4,4;MQ=20	GT:PL	0/1:88,0,64
Ref_Crab_Transcript_29463_386	68	A	G	35.4025	DP=12;VDB=0.448427;SGB=-0.616816;RPB=0.813189;MQB=0.982603;MQSB=1;BQB=0.931779;MQ0F=0;ICB=1;HOB=0.5;AC=1;AN=2;DP4=2,4,2,4;MQ=20	GT:PL	0/1:68,0,62
Ref_Crab_Transcript_29473_524	244	A	G	69	DP=11;VDB=0.30199;SGB=-0.662043;RPB=0.777778;MQB=1;MQSB=0.950952;BQB=0.0555556;MQ0F=0;ICB=1;HOB=0.5;AC=1;AN=2;DP4=1,1,5,4;MQ=20	GT:PL	0/1:101,0,7
Ref_Crab_Transcript_29473_524	246	C	T	82	DP=11;VDB=0.211686;SGB=-0.670168;RPB=-;MQB=-;MQSB=0.952347;BQB=-;MQ0F=0;ICB=-;HOB=-;AC=2;AN=2;DP4=0,0,5,5;MQ=20	GT:PL	1/1:119,34,10
Ref_Crab_Transcript_29473_524	250	G	A	42.0744	DP=12;VDB=0.436012;SGB=-0.651104;RPB=0.594978;MQB=1;MQSB=0.982603;BQB=0.272074;MQ0F=0;ICB=1;HOB=0.5;AC=1;AN=2;DP4=1,3,5,3;MQ=20	GT:PL	0/1:75,0,39
Ref_Crab_Transcript_29488_641	415	A	G	80	DP=58;VDB=0.0775486;SGB=-0.692831;RPB=0.556361;MQB=1;MQSB=1;BQB=0.236917;MQ0F=0;ICB=1;HOB=0.5;AC=1;AN=2;DP4=8,25,6,18;MQ=20	GT:PL	0/1:113,0,141
Ref_Crab_Transcript_29488_641	427	C	T	71	DP=47;VDB=0.0666822;SGB=-0.69168;RPB=0.549244;MQB=1;MQSB=1;BQB=0.012552;MQ0F=0;ICB=1;HOB=0.5;AC=1;AN=2;DP4=9,19,5,14;MQ=20	GT:PL	0/1:104,0,145
Ref_Crab_Transcript_29508_476	130	G	C	45.6715	DP=10;VDB=0.219617;SGB=-0.636426;RPB=0.0916482;MQB=0.916482;MQSB=0.916482;BQB=0.733186;MQ0F=0;ICB=1;HOB=0.5;AC=1;AN=2;DP4=2,1,5,2;MQ=20	GT:PL	0/1:79,0,28
Ref_Crab_Transcript_29521_1082	604	C	T	31.0957	DP=20;VDB=0.237068;SGB=-0.636426;RPB=0.400803;MQB=1;MQSB=1;BQB=0.879351;MQ0F=0;ICB=1;HOB=0.5;AC=1;AN=2;DP4=6,6,3,4;MQ=20	GT:PL	0/1:64,0,114
Ref_Crab_Transcript_29536_737	87	C	T	79	DP=17;VDB=0.0384452;SGB=-0.676189;RPB=0.697005;MQB=1;MQSB=1;BQB=0.902421;MQ0F=0;ICB=1;HOB=0.5;AC=1;AN=2;DP4=3,2,5,6;MQ=20	GT:PL	0/1:112,0,43
Ref_Crab_Transcript_29547_413	91	A	C	36.4051	DP=12;VDB=0.936955;SGB=-0.616816;RPB=0.982603;MQB=0.982603;MQSB=0.95494;BQB=0.813189;MQ0F=0;ICB=1;HOB=0.5;AC=1;AN=2;DP4=4,2,3,3;MQ=20	GT:PL	0/1:69,0,66
Ref_Crab_Transcript_29562_404	100	C	T	78	DP=33;VDB=0.893759;SGB=-0.688148;RPB=0.544435;MQB=1;MQSB=1;BQB=0.728812;MQ0F=0;ICB=1;HOB=0.5;AC=1;AN=2;DP4=9,9,7,8;MQ=20	GT:PL	0/1:111,0,129
Ref_Crab_Transcript_29569_423	273	A	G	36.2278	DP=21;VDB=0.405689;SGB=-0.651104;RPB=0.651439;MQB=1;MQSB=1;BQB=0.628116;MQ0F=0;ICB=1;HOB=0.5;AC=1;AN=2;DP4=4,8,2,6;MQ=20	GT:PL	0/1:69,0,110
Ref_Crab_Transcript_29575_421	179	T	C	55	DP=14;VDB=0.630851;SGB=-0.651104;RPB=0.271965;MQB=1;MQSB=0.966012;BQB=0.997919;MQ0F=0;ICB=1;HOB=0.5;AC=1;AN=2;DP4=3,3,4,4;MQ=20	GT:PL	0/1:88,0,64
Ref_Crab_Transcript_29584_436	3	G	C	47.3213	DP=73;VDB=1.02427e-19;SGB=-0.69311;RPB=0.321541;MQB=1;MQSB=1;BQB=0.937591;MQ0F=0;ICB=1;HOB=0.5;AC=1;AN=2;DP4=12,19,21,10;MQ=20	GT:PL	0/1:80,0,137
Ref_Crab_Transcript_29590_318	4	T	A	30.2595	DP=30;VDB=6.71664e-05;SGB=-0.636426;RPB=1;MQB=1;MQSB=1;BQB=0.908075;MQ0F=0;ICB=1;HOB=0.5;AC=1;AN=2;DP4=4,6,5,2;MQ=20	GT:PL	0/1:63,0,101
Ref_Crab_Transcript_29604_365	319	T	A	71	DP=48;VDB=0.0186218;SGB=-0.691153;RPB=0.79706;MQB=1;MQSB=1;BQB=0.657964;MQ0F=0;ICB=1;HOB=0.5;AC=1;AN=2;DP4=21,3,12,6;MQ=20	GT:PL	0/1:104,0,91
Ref_Crab_Transcript_29624_1534	114	T	C	87	DP=144;VDB=0.809942;SGB=-0.693147;RPB=0.803102;MQB=1;MQSB=1;BQB=0.880785;MQ0F=0;ICB=1;HOB=0.5;AC=1;AN=2;DP4=52,28,36,26;MQ=20	GT:PL	0/1:120,0,134
Ref_Crab_Transcript_29633_492	172	G	A	70	DP=10;VDB=0.171339;SGB=-0.662043;RPB=1;MQB=1;MQSB=1;BQB=1;MQ0F=0;ICB=-;HOB=-;AC=2;AN=2;DP4=1,0,7,2;MQ=20	GT:PL	1/1:97,10,0
Ref_Crab_Transcript_29633_492	187	C	T	77	DP=12;VDB=0.48031;SGB=-0.662043;RPB=1;MQB=1;MQSB=0.916482;BQB=1;MQ0F=0;ICB=-;HOB=-;AC=2;AN=2;DP4=1,0,6,3;MQ=20	GT:PL	1/1:104,10,0
Ref_Crab_Transcript_29641_365	283	T	C	31.3177	DP=14;VDB=0.974085;SGB=-0.616816;RPB=0.927743;MQB=1;MQSB=1;BQB=0.77718;MQ0F=0;ICB=1;HOB=0.5;AC=1;AN=2;DP4=5,3,3,3;MQ=20	GT:PL	0/1:64,0,85
Ref_Crab_Transcript_29707_3104	2199	C	A	40.9372	DP=218;VDB=0.145039;SGB=-0.693147;RPB=0.999867;MQB=1;MQSB=1;BQB=0.202486;MQ0F=0;ICB=1;HOB=0.5;AC=1;AN=2;DP4=61,80,24,49;MQ=20	GT:PL	0/1:74,0,133
Ref_Crab_Transcript_29719_1907	723	A	G	85	DP=28;VDB=0.812925;SGB=-0.686358;RPB=0.79125;MQB=1;MQSB=1;BQB=0.79125;MQ0F=0;ICB=1;HOB=0.5;AC=1;AN=2;DP4=6,5,7,7;MQ=20	GT:PL	0/1:118,0,92
Ref_Crab_Transcript_29723_494	250	C	T	75	DP=34;VDB=0.101528;SGB=-0.683931;RPB=0.699081;MQB=1;MQSB=1;BQB=0.999671;MQ0F=0;ICB=1;HOB=0.5;AC=1;AN=2;DP4=6,7,7,6;MQ=20	GT:PL	0/1:108,0,110
Ref_Crab_Transcript_29724_378	180	T	C	76	DP=46;VDB=0.795249;SGB=-0.69168;RPB=0.516846;MQB=1;MQSB=1;BQB=0.72433;MQ0F=0;ICB=1;HOB=0.5;AC=1;AN=2;DP4=13,14,11,8;MQ=20	GT:PL	0/1:109,0,145
Ref_Crab_Transcript_29731_1129	692	T	C	61	DP=17;VDB=0.039586;SGB=-0.662043;RPB=0.844114;MQB=1;MQSB=1;BQB=0.965592;MQ0F=0;ICB=1;HOB=0.5;AC=1;AN=2;DP4=3,4,4,5;MQ=20	GT:PL	0/1:94,0,72
Ref_Crab_Transcript_29731_1129	729	C	T	55	DP=14;VDB=0.666245;SGB=-0.651104;RPB=0.967216;MQB=1;MQSB=1;BQB=0.0672055;MQ0F=0;ICB=1;HOB=0.5;AC=1;AN=2;DP4=0,6,4,4;MQ=20	GT:PL	0/1:88,0,46
Ref_Crab_Transcript_29743_475	186	T	G	66	DP=26;VDB=0.470998;SGB=-0.680642;RPB=0.945647;MQB=1;MQSB=1;BQB=0.988166;MQ0F=0;ICB=1;HOB=0.5;AC=1;AN=2;DP4=8,6,7,5;MQ=20	GT:PL	0/1:99,0,114
Ref_Crab_Transcript_29743_475	269	G	A	35.1633	DP=15;VDB=0.0501588;SGB=-0.590765;RPB=-;MQB=-;MQSB=-;BQB=-;MQ0F=0;ICB=-;HOB=-;AC=2;AN=2;DP4=0,0,5,0;MQ=20	GT:PL	1/1:62,15,0
Ref_Crab_Transcript_29782_359	240	C	T	58	DP=10;VDB=0.750734;SGB=-0.636426;RPB=0.641538;MQB=0.916482;MQSB=0.783809;BQB=0.274945;MQ0F=0;ICB=1;HOB=0.5;AC=1;AN=2;DP4=1,2,3,4;MQ=20	GT:PL	0/1:91,0,28
Ref_Crab_Transcript_29840_311	269	G	A	32.2123	DP=20;VDB=0.0625989;SGB=-0.651104;RPB=0.997028;MQB=1;MQSB=1;BQB=0.00758414;MQ0F=0;ICB=1;HOB=0.5;AC=1;AN=2;DP4=1,11,2,6;MQ=20	GT:PL	0/1:65,0,79
Ref_Crab_Transcript_29847_398	342	T	G	96	DP=21;VDB=0.00122867;SGB=-0.690438;RPB=0.507729;MQB=1;MQSB=1;BQB=0.119833;MQ0F=0;ICB=1;HOB=0.5;AC=1;AN=2;DP4=2,2,5,12;MQ=20	GT:PL	0/1:130,0,13
Ref_Crab_Transcript_29848_648	204	G	T	71	DP=40;VDB=0.0179815;SGB=-0.689466;RPB=0.0837523;MQB=1;MQSB=1;BQB=0.050807;MQ0F=0;ICB=1;HOB=0.5;AC=1;AN=2;DP4=8,15,8,8;MQ=20	GT:PL	0/1:104,0,140
Ref_Crab_Transcript_29858_2540	1107	A	G	44.8424	DP=41;VDB=0.167798;SGB=-0.683931;RPB=0.994906;MQB=1;MQSB=1;BQB=0.941729;MQ0F=0;ICB=1;HOB=0.5;AC=1;AN=2;DP4=17,10,7,6;MQ=20	GT:PL	0/1:78,0,136
Ref_Crab_Transcript_29873_2199	1465	T	G	44.0345	DP=30;VDB=0.895256;SGB=-0.670168;RPB=1;MQB=1;MQSB=1;BQB=0.602362;MQ0F=0;ICB=1;HOB=0.5;AC=1;AN=2;DP4=7,11,4,6;MQ=20	GT:PL	0/1:77,0,135
Ref_Crab_Transcript_29874_1367	255	G	A	91	DP=271;VDB=0.571059;SGB=-0.693147;RPB=0.887012;MQB=1;MQSB=1;BQB=0.889131;MQ0F=0;ICB=1;HOB=0.5;AC=1;AN=2;DP4=77,60,89,36;MQ=20	GT:PL	0/1:124,0,149
Ref_Crab_Transcript_29878_533	260	A	G	117	DP=20;VDB=0.881266;SGB=-0.69168;RPB=1;MQB=1;MQSB=1;BQB=1;MQ0F=0;ICB=-;HOB=-;AC=2;AN=2;DP4=1,0,14,5;MQ=20	GT:PL	1/1:144,40,0
Ref_Crab_Transcript_29878_533	429	A	G	114	DP=50;VDB=0.118759;SGB=-0.693143;RPB=0.486895;MQB=1;MQSB=1;BQB=0.981582;MQ0F=0;ICB=-;HOB=-;AC=2;AN=2;DP4=0,4,4,34;MQ=20	GT:PL	1/1:141,53,0
Ref_Crab_Transcript_29878_533	441	C	A	78	DP=34;VDB=0.0279508;SGB=-0.692717;RPB=0.867221;MQB=1;MQSB=1;BQB=0.436032;MQ0F=0;ICB=1;HOB=0.5;AC=1;AN=2;DP4=0,11,3,20;MQ=20	GT:PL	0/1:111,0,38
Ref_Crab_Transcript_29878_533	463	A	G	91	DP=15;VDB=0.00749791;SGB=-0.683931;RPB=1;MQB=1;MQSB=1;BQB=1;MQ0F=0;ICB=-;HOB=-;AC=2;AN=2;DP4=0,1,2,11;MQ=20	GT:PL	1/1:118,22,0
Ref_Crab_Transcript_29910_558	401	G	A	64	DP=14;VDB=0.999135;SGB=-0.662043;RPB=0.526122;MQB=1;MQSB=1;BQB=0.726149;MQ0F=0;ICB=1;HOB=0.5;AC=1;AN=2;DP4=4,1,5,4;MQ=20	GT:PL	0/1:97,0,44
Ref_Crab_Transcript_29939_517	179	A	G	46.3785	DP=13;VDB=0.223909;SGB=-0.636426;RPB=0.899815;MQB=0.961166;MQSB=0.961166;BQB=0.245404;MQ0F=0;ICB=1;HOB=0.5;AC=1;AN=2;DP4=3,3,3,4;MQ=20	GT:PL	0/1:79,0,66
Ref_Crab_Transcript_29941_609	118	G	C	41.1862	DP=10;VDB=0.660869;SGB=-0.616816;RPB=0.895781;MQB=1.00775;MQSB=0.916482;BQB=0.895781;MQ0F=0;ICB=1;HOB=0.5;AC=1;AN=2;DP4=4,0,3,3;MQ=20	GT:PL	0/1:74,0,33
Ref_Crab_Transcript_29941_609	139	C	G	41.228	DP=10;VDB=0.670308;SGB=-0.616816;RPB=0.727822;MQB=1.00775;MQSB=1.00775;BQB=0.111973;MQ0F=0;ICB=1;HOB=0.5;AC=1;AN=2;DP4=3,1,3,3;MQ=20	GT:PL	0/1:74,0,42
Ref_Crab_Transcript_29944_715	465	A	G	36.4051	DP=12;VDB=0.758048;SGB=-0.616816;RPB=0.372712;MQB=0.982603;MQSB=0.95494;BQB=0.864013;MQ0F=0;ICB=1;HOB=0.5;AC=1;AN=2;DP4=2,4,3,3;MQ=20	GT:PL	0/1:69,0,68
Ref_Crab_Transcript_29944_715	487	T	A	38.3687	DP=11;VDB=0.530999;SGB=-0.616816;RPB=0.8618;MQB=0.950952;MQSB=0.950952;BQB=0.950952;MQ0F=0;ICB=1;HOB=0.5;AC=1;AN=2;DP4=2,3,3,3;MQ=20	GT:PL	0/1:71,0,57
Ref_Crab_Transcript_29964_332	156	C	T	95	DP=36;VDB=0.859734;SGB=-0.691153;RPB=0.637533;MQB=1;MQSB=1;BQB=0.315884;MQ0F=0;ICB=1;HOB=0.5;AC=1;AN=2;DP4=7,9,8,10;MQ=20	GT:PL	0/1:128,0,116
Ref_Crab_Transcript_30011_501	279	G	A	49.1666	DP=26;VDB=0.585652;SGB=-0.670168;RPB=0.32364;MQB=1;MQSB=1;BQB=0.79079;MQ0F=0;ICB=1;HOB=0.5;AC=1;AN=2;DP4=7,9,4,6;MQ=20	GT:PL	0/1:82,0,129
Ref_Crab_Transcript_30057_493	152	C	T	35.3693	DP=11;VDB=0.00513213;SGB=-0.616816;RPB=0.0297172;MQB=0.950952;MQSB=0.950952;BQB=0.891517;MQ0F=0;ICB=1;HOB=0.5;AC=1;AN=2;DP4=2,3,4,2;MQ=20	GT:PL	0/1:68,0,57
Ref_Crab_Transcript_30062_706	322	T	C	44.4044	DP=14;VDB=0.00105183;SGB=-0.636426;RPB=0.240074;MQB=0.966012;MQSB=1;BQB=0.571605;MQ0F=0;ICB=1;HOB=0.5;AC=1;AN=2;DP4=3,4,3,4;MQ=20	GT:PL	0/1:77,0,77
Ref_Crab_Transcript_30062_706	343	C	T	42.074	DP=15;VDB=0.472399;SGB=-0.670168;RPB=0.367879;MQB=1;MQSB=1;BQB=0.939413;MQ0F=0;ICB=1;HOB=0.5;AC=1;AN=2;DP4=2,2,4,6;MQ=20	GT:PL	0/1:75,0,38
Ref_Crab_Transcript_30062_706	347	G	A	50	DP=12;VDB=0.000823798;SGB=-0.636426;RPB=0.763675;MQB=0.964642;MQSB=0.950952;BQB=0.803868;MQ0F=0;ICB=1;HOB=0.5;AC=1;AN=2;DP4=2,2,3,4;MQ=20	GT:PL	0/1:83,0,42
Ref_Crab_Transcript_30062_706	371	T	C	46.3785	DP=14;VDB=0.00105183;SGB=-0.636426;RPB=0.470358;MQB=0.961166;MQSB=1;BQB=0.920266;MQ0F=0;ICB=1;HOB=0.5;AC=1;AN=2;DP4=2,4,3,4;MQ=20	GT:PL	0/1:79,0,65
Ref_Crab_Transcript_30062_706	394	G	A	33.406	DP=12;VDB=0.0389458;SGB=-0.616816;RPB=0.982603;MQB=0.982603;MQSB=0.982603;BQB=0.372712;MQ0F=0;ICB=1;HOB=0.5;AC=1;AN=2;DP4=2,4,4,2;MQ=20	GT:PL	0/1:66,0,68
Ref_Crab_Transcript_30063_457	306	G	A	32.9841	DP=23;VDB=0.685546;SGB=-0.651104;RPB=0.991701;MQB=1;MQSB=1;BQB=0.875173;MQ0F=0;ICB=1;HOB=0.5;AC=1;AN=2;DP4=10,5,3,5;MQ=20	GT:PL	0/1:66,0,116
Ref_Crab_Transcript_30068_304	115	C	T	31.9065	DP=14;VDB=0.489658;SGB=-0.616816;RPB=0.809011;MQB=0.924584;MQSB=0.924584;BQB=0.924584;MQ0F=0;ICB=1;HOB=0.5;AC=1;AN=2;DP4=1,2,5,1;MQ=20	GT:PL	0/1:65,0,31
Ref_Crab_Transcript_30072_1423	1058	G	T	109	DP=59;VDB=7.06293e-12;SGB=-0.693097;RPB=2.1676e-08;MQB=1;MQSB=1;BQB=1.3045e-05;MQ0F=0;ICB=1;HOB=0.5;AC=1;AN=2;DP4=4,16,16,14;MQ=20	GT:PL	0/1:142,0,97
Ref_Crab_Transcript_30085_748	573	T	G	39.2277	DP=11;VDB=0.0110037;SGB=-0.616816;RPB=0.0559863;MQB=1.00775;MQSB=1.00775;BQB=0.727822;MQ0F=0;ICB=1;HOB=0.5;AC=1;AN=2;DP4=2,2,2,4;MQ=20	GT:PL	0/1:72,0,45
Ref_Crab_Transcript_30088_1115	13	G	A	104	DP=79;VDB=1.39982e-12;SGB=-0.693144;RPB=0.0193911;MQB=1;MQSB=1;BQB=0.0455975;MQ0F=0;ICB=1;HOB=0.5;AC=1;AN=2;DP4=3,16,24,15;MQ=20	GT:PL	0/1:137,0,68
Ref_Crab_Transcript_30091_618	267	G	T	56	DP=17;VDB=0.791324;SGB=-0.662043;RPB=0.844114;MQB=1;MQSB=1;BQB=0.507697;MQ0F=0;ICB=1;HOB=0.5;AC=1;AN=2;DP4=4,3,6,3;MQ=20	GT:PL	0/1:89,0,71
Ref_Crab_Transcript_30091_618	410	A	G	45.0986	DP=37;VDB=0.018555;SGB=-0.590765;RPB=1;MQB=1;MQSB=1;BQB=1;MQ0F=0;ICB=-;HOB=-;AC=2;AN=2;DP4=1,0,3,2;MQ=20	GT:PL	1/1:72,4,0
Ref_Crab_Transcript_30091_618	415	A	T	35.1205	DP=42;VDB=0.92219;SGB=-0.651104;RPB=1;MQB=1;MQSB=0.974597;BQB=1;MQ0F=0;ICB=-;HOB=-;AC=2;AN=2;DP4=1,0,3,5;MQ=20	GT:PL	1/1:75,17,13
Ref_Crab_Transcript_30091_618	419	G	A	80	DP=33;VDB=0.000105247;SGB=-0.662043;RPB=-;MQB=-;MQSB=0.924584;BQB=-;MQ0F=0;ICB=-;HOB=-;AC=2;AN=2;DP4=0,0,3,6;MQ=20	GT:PL	1/1:107,27,0
Ref_Crab_Transcript_30091_618	422	G	A	139	DP=59;VDB=4.34559e-17;SGB=-0.693146;RPB=0.510106;MQB=1;MQSB=1;BQB=0.0212379;MQ0F=0;ICB=-;HOB=-;AC=2;AN=2;DP4=2,1,16,26;MQ=20	GT:PL	1/1:166,76,0
Ref_Crab_Transcript_30108_366	138	A	G	33.1862	DP=18;VDB=0.128343;SGB=-0.636426;RPB=0.554013;MQB=1;MQSB=1;BQB=0.963762;MQ0F=0;ICB=1;HOB=0.5;AC=1;AN=2;DP4=7,4,4,3;MQ=20	GT:PL	0/1:66,0,103
Ref_Crab_Transcript_30108_366	152	A	G	47.3881	DP=19;VDB=0.121227;SGB=-0.662043;RPB=0.360295;MQB=1;MQSB=1;BQB=0.992528;MQ0F=0;ICB=1;HOB=0.5;AC=1;AN=2;DP4=7,3,6,3;MQ=20	GT:PL	0/1:80,0,90
Ref_Crab_Transcript_30121_893	757	C	T	49.9626	DP=182;VDB=0.993808;SGB=-0.693147;RPB=0.138313;MQB=1;MQSB=1;BQB=0.0358706;MQ0F=0;ICB=1;HOB=0.5;AC=1;AN=2;DP4=40,76,24,38;MQ=20	GT:PL	0/1:83,0,140
Ref_Crab_Transcript_30131_1592	1517	C	A	123	DP=219;VDB=0.00400735;SGB=-0.693147;RPB=0.249937;MQB=1;MQSB=1;BQB=0.784327;MQ0F=0;ICB=1;HOB=0.5;AC=1;AN=2;DP4=23,88,19,86;MQ=20	GT:PL	0/1:156,0,162
Ref_Crab_Transcript_30133_658	355	A	C	53	DP=13;VDB=0.54263;SGB=-0.662043;RPB=0.423112;MQB=1;MQSB=1;BQB=0.341501;MQ0F=0;ICB=1;HOB=0.5;AC=1;AN=2;DP4=1,3,7,2;MQ=20	GT:PL	0/1:86,0,35
Ref_Crab_Transcript_30142_3452	1236	T	C	102	DP=97;VDB=0.748198;SGB=-0.693147;RPB=0.88285;MQB=1;MQSB=1;BQB=0.441772;MQ0F=0;ICB=1;HOB=0.5;AC=1;AN=2;DP4=27,21,26,20;MQ=20	GT:PL	0/1:135,0,138
Ref_Crab_Transcript_30149_465	131	A	G	77	DP=176;VDB=9.10414e-18;SGB=-0.693147;RPB=0.693727;MQB=1;MQSB=1;BQB=0.886641;MQ0F=0;ICB=-;HOB=-;AC=2;AN=2;DP4=20,8,110,27;MQ=20	GT:PL	1/1:104,106,0
Ref_Crab_Transcript_30149_465	146	T	C	94	DP=208;VDB=0.000400701;SGB=-0.693147;RPB=0.755508;MQB=1;MQSB=1;BQB=0.211729;MQ0F=0;ICB=1;HOB=0.5;AC=1;AN=2;DP4=60,25,87,28;MQ=20	GT:PL	0/1:127,0,106
Ref_Crab_Transcript_30153_1416	1	A	G	37.3331	DP=231;VDB=0;SGB=-0.693147;RPB=0.0304516;MQB=1;MQSB=1;BQB=0.00377794;MQ0F=0;ICB=1;HOB=0.5;AC=1;AN=2;DP4=2,46,40,143;MQ=20	GT:PL	0/1:70,0,44
Ref_Crab_Transcript_30153_1416	4	A	C	51	DP=494;VDB=0;SGB=-0.693147;RPB=0.495995;MQB=1;MQSB=1;BQB=0.834134;MQ0F=0;ICB=1;HOB=0.5;AC=1;AN=2;DP4=36,137,23,115;MQ=20	GT:PL	0/1:84,0,142
Ref_Crab_Transcript_30160_2790	754	G	A	38.4047	DP=15;VDB=0.479284;SGB=-0.636426;RPB=0.834543;MQB=0.966012;MQSB=1;BQB=0.966012;MQ0F=0;ICB=1;HOB=0.5;AC=1;AN=2;DP4=4,3,5,2;MQ=20	GT:PL	0/1:71,0,76
Ref_Crab_Transcript_30162_920	137	G	C	66	DP=13;VDB=0.495904;SGB=-0.662043;RPB=0.811069;MQB=1;MQSB=0.982603;BQB=0.933909;MQ0F=0;ICB=1;HOB=0.5;AC=1;AN=2;DP4=1,2,5,4;MQ=20	GT:PL	0/1:100,0,22
Ref_Crab_Transcript_30162_920	138	A	C	66	DP=13;VDB=0.495904;SGB=-0.662043;RPB=0.811069;MQB=1;MQSB=0.982603;BQB=0.857404;MQ0F=0;ICB=1;HOB=0.5;AC=1;AN=2;DP4=1,2,5,4;MQ=20	GT:PL	0/1:100,0,22
Ref_Crab_Transcript_30163_813	320	C	T	135	DP=6666;VDB=0.990927;SGB=-0.693147;RPB=0.968263;MQB=1;MQSB=1;BQB=8.20126e-05;MQ0F=0;ICB=-;HOB=-;AC=2;AN=2;DP4=286,237,3227,2587;MQ=20	GT:PL	1/1:162,255,0
Ref_Crab_Transcript_30163_813	325	A	G	177	DP=6891;VDB=0.941617;SGB=-0.693147;RPB=0.605968;MQB=1;MQSB=1;BQB=8.48395e-08;MQ0F=0;ICB=-;HOB=-;AC=2;AN=2;DP4=297,238,3464,2423;MQ=20	GT:PL	1/1:204,255,0
Ref_Crab_Transcript_30163_813	344	C	A	168	DP=6675;VDB=0.0310843;SGB=-0.693147;RPB=0.379738;MQB=1;MQSB=1;BQB=0.405622;MQ0F=0;ICB=-;HOB=-;AC=2;AN=2;DP4=299,252,3202,2704;MQ=20	GT:PL	1/1:195,255,0
Ref_Crab_Transcript_30163_813	359	C	T	211	DP=7429;VDB=0.0929805;SGB=-0.693147;RPB=0.861996;MQB=1;MQSB=1;BQB=0.0303697;MQ0F=0;ICB=-;HOB=-;AC=2;AN=2;DP4=307,275,3522,3033;MQ=20	GT:PL	1/1:238,255,0
Ref_Crab_Transcript_30163_813	361	G	A	175	DP=7625;VDB=0.112279;SGB=-0.693147;RPB=0.541618;MQB=1;MQSB=1;BQB=0.194342;MQ0F=0;ICB=-;HOB=-;AC=2;AN=2;DP4=303,286,3520,3077;MQ=20	GT:PL	1/1:202,255,0
Ref_Crab_Transcript_30173_663	262	T	C	76	DP=19;VDB=0.230033;SGB=-0.676189;RPB=0.0691334;MQB=1;MQSB=1;BQB=0.902783;MQ0F=0;ICB=1;HOB=0.5;AC=1;AN=2;DP4=4,2,6,5;MQ=20	GT:PL	0/1:109,0,53
Ref_Crab_Transcript_30184_1493	47	A	T	31.3253	DP=16;VDB=0.377852;SGB=-0.616816;RPB=1;MQB=1;MQSB=1;BQB=0.902954;MQ0F=0;ICB=1;HOB=0.5;AC=1;AN=2;DP4=5,3,3,3;MQ=20	GT:PL	0/1:64,0,84
Ref_Crab_Transcript_30187_601	525	A	G	50	DP=30;VDB=0.966159;SGB=-0.680642;RPB=0.997478;MQB=1;MQSB=1;BQB=0.756987;MQ0F=0;ICB=1;HOB=0.5;AC=1;AN=2;DP4=4,5,2,10;MQ=20	GT:PL	0/1:83,0,83
Ref_Crab_Transcript_30196_594	294	G	A	52	DP=19;VDB=0.722752;SGB=-0.662043;RPB=0.920044;MQB=1;MQSB=1;BQB=0.114463;MQ0F=0;ICB=1;HOB=0.5;AC=1;AN=2;DP4=4,6,5,4;MQ=20	GT:PL	0/1:85,0,97
Ref_Crab_Transcript_30201_392	151	G	A	41.2303	DP=10;VDB=0.00688729;SGB=-0.616816;RPB=0.335918;MQB=1.00775;MQSB=0.916482;BQB=0.559863;MQ0F=0;ICB=1;HOB=0.5;AC=1;AN=2;DP4=4,0,3,3;MQ=20	GT:PL	0/1:74,0,36
Ref_Crab_Transcript_30221_546	126	G	A	87	DP=48;VDB=0.0327391;SGB=-0.692352;RPB=0.489674;MQB=1;MQSB=1;BQB=0.251041;MQ0F=0;ICB=1;HOB=0.5;AC=1;AN=2;DP4=19,8,11,10;MQ=20	GT:PL	0/1:120,0,124
Ref_Crab_Transcript_30227_329	71	A	C	52	DP=63;VDB=0.000217865;SGB=-0.683931;RPB=0.179317;MQB=1;MQSB=1;BQB=0.493953;MQ0F=0;ICB=1;HOB=0.5;AC=1;AN=2;DP4=6,5,11,2;MQ=20	GT:PL	0/1:85,0,91
Ref_Crab_Transcript_30239_587	342	C	A	115	DP=70;VDB=0.806848;SGB=-0.693147;RPB=0.913734;MQB=1;MQSB=1;BQB=0.79877;MQ0F=0;ICB=1;HOB=0.5;AC=1;AN=2;DP4=11,10,17,30;MQ=20	GT:PL	0/1:148,0,82
Ref_Crab_Transcript_30244_686	471	T	C	33.1044	DP=22;VDB=0.603537;SGB=-0.651104;RPB=0.994117;MQB=1;MQSB=1;BQB=0.576169;MQ0F=0;ICB=1;HOB=0.5;AC=1;AN=2;DP4=3,10,4,4;MQ=20	GT:PL	0/1:66,0,107
Ref_Crab_Transcript_30247_461	1	G	A	147	DP=2065;VDB=0;SGB=-0.693147;RPB=0.00953013;MQB=1;MQSB=1;BQB=3.92954e-17;MQ0F=0;ICB=-;HOB=-;AC=2;AN=2;DP4=241,111,316,1394;MQ=20	GT:PL	1/1:174,155,0
Ref_Crab_Transcript_30247_461	2	C	A	122	DP=2553;VDB=0;SGB=-0.693147;RPB=0.0791679;MQB=1;MQSB=1;BQB=2.0787e-38;MQ0F=0;ICB=1;HOB=0.5;AC=1;AN=2;DP4=139,893,442,614;MQ=20	GT:PL	0/1:155,0,159
Ref_Crab_Transcript_30247_461	3	G	A	90	DP=2781;VDB=0;SGB=-0.693147;RPB=0.00687567;MQB=1;MQSB=1;BQB=5.55344e-16;MQ0F=0;ICB=-;HOB=-;AC=2;AN=2;DP4=205,105,398,1421;MQ=20	GT:PL	1/1:129,89,12
Ref_Crab_Transcript_30253_840	142	T	C	72	DP=78;VDB=0.000585151;SGB=-0.69312;RPB=0.600474;MQB=1;MQSB=1;BQB=0.00274048;MQ0F=0;ICB=1;HOB=0.5;AC=1;AN=2;DP4=26,18,23,9;MQ=20	GT:PL	0/1:105,0,140
Ref_Crab_Transcript_30257_1046	916	A	G	51	DP=11;VDB=0.27538;SGB=-0.651104;RPB=0.594025;MQB=1;MQSB=0.964642;BQB=0.954207;MQ0F=0;ICB=1;HOB=0.5;AC=1;AN=2;DP4=2,1,2,6;MQ=20	GT:PL	0/1:84,0,25
Ref_Crab_Transcript_30279_384	374	T	G	176	DP=31;VDB=2.76004e-10;SGB=-0.693079;RPB=-;MQB=-;MQSB=1;BQB=-;MQ0F=0;ICB=-;HOB=-;AC=2;AN=2;DP4=0,0,14,15;MQ=20	GT:PL	1/1:203,87,0
Ref_Crab_Transcript_30300_563	178	A	G	45.3821	DP=17;VDB=0.768478;SGB=-0.651104;RPB=0.846482;MQB=1;MQSB=1;BQB=0.928603;MQ0F=0;ICB=1;HOB=0.5;AC=1;AN=2;DP4=5,4,3,5;MQ=20	GT:PL	0/1:78,0,91
Ref_Crab_Transcript_30330_1250	753	G	A	43.3504	DP=19;VDB=0.108414;SGB=-0.651104;RPB=0.46131;MQB=1;MQSB=1;BQB=0.99606;MQ0F=0;ICB=1;HOB=0.5;AC=1;AN=2;DP4=4,6,5,3;MQ=20	GT:PL	0/1:76,0,99
Ref_Crab_Transcript_30343_1117	227	G	T	72	DP=6326;VDB=0.0848051;SGB=-0.693147;RPB=0.00365529;MQB=1;MQSB=1;BQB=0.27409;MQ0F=0;ICB=1;HOB=0.5;AC=1;AN=2;DP4=1961,1510,1399,1294;MQ=20	GT:PL	0/1:105,0,145
Ref_Crab_Transcript_30365_1607	1025	T	C	92	DP=923;VDB=0.729928;SGB=-0.693147;RPB=0.490833;MQB=1;MQSB=1;BQB=0.966623;MQ0F=0;ICB=1;HOB=0.5;AC=1;AN=2;DP4=201,319,157,220;MQ=20	GT:PL	0/1:125,0,158
Ref_Crab_Transcript_30383_728	152	C	T	97	DP=297;VDB=0.0153631;SGB=-0.693147;RPB=0.289988;MQB=1;MQSB=1;BQB=0.520803;MQ0F=0;ICB=1;HOB=0.5;AC=1;AN=2;DP4=103,52,89,48;MQ=20	GT:PL	0/1:130,0,142
Ref_Crab_Transcript_30410_435	405	C	T	100	DP=10;VDB=0.000585976;SGB=-0.670168;RPB=-;MQB=-;MQSB=0.916482;BQB=-;MQ0F=0;ICB=-;HOB=-;AC=2;AN=2;DP4=0,0,7,3;MQ=20	GT:PL	1/1:127,30,0
Ref_Crab_Transcript_30410_435	411	C	G	98	DP=10;VDB=0.000585976;SGB=-0.670168;RPB=-;MQB=-;MQSB=0.916482;BQB=-;MQ0F=0;ICB=-;HOB=-;AC=2;AN=2;DP4=0,0,7,3;MQ=20	GT:PL	1/1:125,30,0
Ref_Crab_Transcript_30411_756	524	T	C	38.2279	DP=10;VDB=0.773942;SGB=-0.616816;RPB=0.503877;MQB=1.00775;MQSB=1.00775;BQB=1.00775;MQ0F=0;ICB=1;HOB=0.5;AC=1;AN=2;DP4=2,2,4,2;MQ=20	GT:PL	0/1:71,0,45
Ref_Crab_Transcript_30411_756	527	G	A	35.3693	DP=11;VDB=0.76871;SGB=-0.616816;RPB=0.891517;MQB=0.950952;MQSB=0.950952;BQB=0.8618;MQ0F=0;ICB=1;HOB=0.5;AC=1;AN=2;DP4=2,3,4,2;MQ=20	GT:PL	0/1:68,0,57
Ref_Crab_Transcript_30411_756	530	C	T	36.2425	DP=11;VDB=0.76871;SGB=-0.616816;RPB=0.559863;MQB=1.00775;MQSB=1.00775;BQB=0.895781;MQ0F=0;ICB=1;HOB=0.5;AC=1;AN=2;DP4=2,2,4,2;MQ=20	GT:PL	0/1:69,0,45
Ref_Crab_Transcript_30411_756	538	T	C	35.3563	DP=12;VDB=0.763412;SGB=-0.616816;RPB=0.891517;MQB=0.950952;MQSB=0.950952;BQB=0.8618;MQ0F=0;ICB=1;HOB=0.5;AC=1;AN=2;DP4=2,3,4,2;MQ=20	GT:PL	0/1:68,0,54
Ref_Crab_Transcript_30418_775	584	G	A	48.3893	DP=17;VDB=0.612706;SGB=-0.651104;RPB=0.457304;MQB=1;MQSB=1;BQB=0.981652;MQ0F=0;ICB=1;HOB=0.5;AC=1;AN=2;DP4=3,6,3,5;MQ=20	GT:PL	0/1:81,0,90
Ref_Crab_Transcript_30418_775	693	A	G	31.3177	DP=14;VDB=0.670308;SGB=-0.616816;RPB=0.94925;MQB=1;MQSB=0.966012;BQB=0.94925;MQ0F=0;ICB=1;HOB=0.5;AC=1;AN=2;DP4=4,4,3,3;MQ=20	GT:PL	0/1:64,0,88
Ref_Crab_Transcript_30487_8715	7595	T	C	105	DP=93;VDB=0.388673;SGB=-0.693147;RPB=0.469318;MQB=1;MQSB=1;BQB=0.994258;MQ0F=0;ICB=1;HOB=0.5;AC=1;AN=2;DP4=15,18,32,26;MQ=20	GT:PL	0/1:138,0,107
Ref_Crab_Transcript_30494_1911	1	G	A	85	DP=42;VDB=1.30483e-15;SGB=-0.692914;RPB=0.949994;MQB=1;MQSB=1;BQB=0.919386;MQ0F=0;ICB=1;HOB=0.5;AC=1;AN=2;DP4=9,8,8,17;MQ=20	GT:PL	0/1:118,0,107
Ref_Crab_Transcript_30494_1911	3	G	A	61	DP=99;VDB=1.57796e-11;SGB=-0.69168;RPB=0.0388896;MQB=1;MQSB=1;BQB=0.349978;MQ0F=0;ICB=1;HOB=0.5;AC=1;AN=2;DP4=16,15,5,14;MQ=20	GT:PL	0/1:94,0,143
Ref_Crab_Transcript_30494_1911	1693	A	G	40.184	DP=61;VDB=0.00333858;SGB=-0.692717;RPB=0.205283;MQB=1;MQSB=1;BQB=0.0412064;MQ0F=0;ICB=1;HOB=0.5;AC=1;AN=2;DP4=5,31,2,21;MQ=20	GT:PL	0/1:73,0,123
Ref_Crab_Transcript_30495_713	172	G	A	67	DP=84;VDB=1.30059e-09;SGB=-0.692067;RPB=4.41033e-07;MQB=1;MQSB=1;BQB=6.3732e-05;MQ0F=0;ICB=1;HOB=0.5;AC=1;AN=2;DP4=20,0,10,10;MQ=20	GT:PL	0/1:100,0,58
Ref_Crab_Transcript_30496_2882	592	G	A	64	DP=18;VDB=0.737658;SGB=-0.670168;RPB=0.319567;MQB=1;MQSB=1;BQB=0.800884;MQ0F=0;ICB=1;HOB=0.5;AC=1;AN=2;DP4=7,1,6,4;MQ=20	GT:PL	0/1:97,0,62
Ref_Crab_Transcript_30508_914	640	G	A	44.6826	DP=93;VDB=0.295216;SGB=-0.693054;RPB=0.920398;MQB=1;MQSB=1;BQB=0.747053;MQ0F=0;ICB=1;HOB=0.5;AC=1;AN=2;DP4=21,43,11,17;MQ=20	GT:PL	0/1:78,0,144
Ref_Crab_Transcript_30537_509	199	G	C	51	DP=30;VDB=0.167715;SGB=-0.676189;RPB=0.141486;MQB=1;MQSB=1;BQB=0.390766;MQ0F=0;ICB=1;HOB=0.5;AC=1;AN=2;DP4=7,11,6,5;MQ=20	GT:PL	0/1:84,0,134
Ref_Crab_Transcript_30542_330	202	A	G	41.9041	DP=11;VDB=0.218338;SGB=-0.616816;RPB=0.924584;MQB=0.924584;MQSB=0.924584;BQB=0.115573;MQ0F=0;ICB=1;HOB=0.5;AC=1;AN=2;DP4=1,2,2,4;MQ=20	GT:PL	0/1:75,0,31
Ref_Crab_Transcript_30568_1423	1001	G	A	67	DP=1794;VDB=0.781542;SGB=-0.693147;RPB=0.968499;MQB=1;MQSB=1;BQB=6.37901e-11;MQ0F=0;ICB=1;HOB=0.5;AC=1;AN=2;DP4=182,232,585,711;MQ=20	GT:PL	0/1:97,0,5
Ref_Crab_Transcript_30590_304	116	T	G	97	DP=123;VDB=0.785185;SGB=-0.693147;RPB=0.659587;MQB=1;MQSB=1;BQB=0.968851;MQ0F=0;ICB=1;HOB=0.5;AC=1;AN=2;DP4=47,14,33,22;MQ=20	GT:PL	0/1:130,0,118
Ref_Crab_Transcript_30620_923	183	C	T	84	DP=12;VDB=0.77035;SGB=-0.670168;RPB=1;MQB=1;MQSB=1;BQB=1;MQ0F=0;ICB=-;HOB=-;AC=2;AN=2;DP4=1,0,7,3;MQ=20	GT:PL	1/1:111,13,0
Ref_Crab_Transcript_30653_335	213	A	G	41.2278	DP=10;VDB=0.789228;SGB=-0.616816;RPB=0.727822;MQB=1.00775;MQSB=1.00775;BQB=0.895781;MQ0F=0;ICB=1;HOB=0.5;AC=1;AN=2;DP4=1,3,3,3;MQ=20	GT:PL	0/1:74,0,43
Ref_Crab_Transcript_30669_1176	1063	G	C	87	DP=39;VDB=0.222921;SGB=-0.691153;RPB=0.165168;MQB=1;MQSB=1;BQB=0.999456;MQ0F=0;ICB=1;HOB=0.5;AC=1;AN=2;DP4=5,12,5,13;MQ=20	GT:PL	0/1:120,0,115
Ref_Crab_Transcript_30682_312	74	G	A	48.4043	DP=17;VDB=0.0357887;SGB=-0.651104;RPB=0.951579;MQB=1;MQSB=1;BQB=0.422455;MQ0F=0;ICB=1;HOB=0.5;AC=1;AN=2;DP4=6,2,5,3;MQ=20	GT:PL	0/1:81,0,75
Ref_Crab_Transcript_30706_727	507	C	T	170	DP=24;VDB=0.871941;SGB=-0.692831;RPB=-;MQB=-;MQSB=1;BQB=-;MQ0F=0;ICB=-;HOB=-;AC=2;AN=2;DP4=0,0,7,17;MQ=20	GT:PL	1/1:197,72,0
Ref_Crab_Transcript_30724_327	218	C	A	33.406	DP=12;VDB=0.688859;SGB=-0.616816;RPB=0.372712;MQB=0.982603;MQSB=0.95494;BQB=0.11859;MQ0F=0;ICB=1;HOB=0.5;AC=1;AN=2;DP4=3,3,4,2;MQ=20	GT:PL	0/1:66,0,69
Ref_Crab_Transcript_30737_555	117	T	C	71	DP=58;VDB=0.283669;SGB=-0.693054;RPB=0.999161;MQB=1;MQSB=1;BQB=0.581941;MQ0F=0;ICB=1;HOB=0.5;AC=1;AN=2;DP4=22,6,22,6;MQ=20	GT:PL	0/1:104,0,107
Ref_Crab_Transcript_30739_1317	35	T	A	36.1517	DP=23;VDB=0.00433074;SGB=-0.651104;RPB=0.976675;MQB=1;MQSB=1;BQB=0.64199;MQ0F=0;ICB=1;HOB=0.5;AC=1;AN=2;DP4=13,0,5,3;MQ=20	GT:PL	0/1:69,0,65
Ref_Crab_Transcript_30739_1317	1236	C	A	31.5899	DP=101;VDB=0.0877182;SGB=-0.693079;RPB=0.868733;MQB=1;MQSB=1;BQB=0.909962;MQ0F=0;ICB=1;HOB=0.5;AC=1;AN=2;DP4=19,51,8,21;MQ=20	GT:PL	0/1:65,0,142
Ref_Crab_Transcript_30745_676	60	A	G	48.1667	DP=13;VDB=0.00179842;SGB=-0.651104;RPB=0.958048;MQB=1;MQSB=1;BQB=0.342519;MQ0F=0;ICB=1;HOB=0.5;AC=1;AN=2;DP4=2,3,6,2;MQ=20	GT:PL	0/1:81,0,52
Ref_Crab_Transcript_30745_676	66	G	T	48.1667	DP=13;VDB=0.00169803;SGB=-0.651104;RPB=0.958048;MQB=1;MQSB=1;BQB=0.213769;MQ0F=0;ICB=1;HOB=0.5;AC=1;AN=2;DP4=2,3,6,2;MQ=20	GT:PL	0/1:81,0,52
Ref_Crab_Transcript_30745_676	67	T	C	48.1667	DP=13;VDB=0.00169803;SGB=-0.651104;RPB=0.958048;MQB=1;MQSB=1;BQB=0.908075;MQ0F=0;ICB=1;HOB=0.5;AC=1;AN=2;DP4=2,3,6,2;MQ=20	GT:PL	0/1:81,0,52
Ref_Crab_Transcript_30745_676	83	A	G	48.1667	DP=13;VDB=0.00154198;SGB=-0.651104;RPB=0.989343;MQB=1;MQSB=1;BQB=0.163537;MQ0F=0;ICB=1;HOB=0.5;AC=1;AN=2;DP4=2,3,6,2;MQ=20	GT:PL	0/1:81,0,52
Ref_Crab_Transcript_30752_315	157	G	A	121	DP=11;VDB=0.000263607;SGB=-0.662043;RPB=-;MQB=-;MQSB=0.5;BQB=-;MQ0F=0;ICB=-;HOB=-;AC=2;AN=2;DP4=0,0,7,2;MQ=25	GT:PL	1/1:148,27,0
Ref_Crab_Transcript_30752_315	221	T	C	217	DP=20;VDB=8.13432e-05;SGB=-0.692067;RPB=-;MQB=-;MQSB=0.962269;BQB=-;MQ0F=0;ICB=-;HOB=-;AC=2;AN=2;DP4=0,0,7,13;MQ=25	GT:PL	1/1:244,60,0
Ref_Crab_Transcript_30758_450	122	T	C	31.2699	DP=17;VDB=0.125342;SGB=-0.636426;RPB=0.79189;MQB=1;MQSB=1;BQB=0.989343;MQ0F=0;ICB=1;HOB=0.5;AC=1;AN=2;DP4=7,3,5,2;MQ=20	GT:PL	0/1:64,0,93
Ref_Crab_Transcript_30758_450	126	T	C	33.3377	DP=17;VDB=0.125342;SGB=-0.636426;RPB=0.892753;MQB=1;MQSB=1;BQB=0.9986;MQ0F=0;ICB=1;HOB=0.5;AC=1;AN=2;DP4=6,3,5,2;MQ=20	GT:PL	0/1:66,0,89
Ref_Crab_Transcript_30758_450	245	C	T	86	DP=40;VDB=0.304388;SGB=-0.691153;RPB=0.666078;MQB=1;MQSB=1;BQB=0.953119;MQ0F=0;ICB=1;HOB=0.5;AC=1;AN=2;DP4=11,10,7,11;MQ=20	GT:PL	0/1:119,0,132
Ref_Crab_Transcript_30764_447	95	C	G	92	DP=25;VDB=0.0169633;SGB=-0.688148;RPB=0.397142;MQB=1;MQSB=1;BQB=0.857404;MQ0F=0;ICB=1;HOB=0.5;AC=1;AN=2;DP4=7,3,7,8;MQ=20	GT:PL	0/1:125,0,77
Ref_Crab_Transcript_30766_911	498	G	T	122	DP=234;VDB=0.619657;SGB=-0.693147;RPB=0.95441;MQB=1;MQSB=1;BQB=0.95325;MQ0F=0;ICB=1;HOB=0.5;AC=1;AN=2;DP4=51,54,55,71;MQ=20	GT:PL	0/1:155,0,135
Ref_Crab_Transcript_30766_911	531	C	T	110	DP=232;VDB=0.887059;SGB=-0.693147;RPB=0.619071;MQB=1;MQSB=1;BQB=0.00114963;MQ0F=0;ICB=1;HOB=0.5;AC=1;AN=2;DP4=59,54,45,59;MQ=20	GT:PL	0/1:143,0,147
Ref_Crab_Transcript_30801_530	183	C	T	35.3694	DP=12;VDB=0.147842;SGB=-0.616816;RPB=0.208021;MQB=0.950952;MQSB=1;BQB=0.0297172;MQ0F=0;ICB=1;HOB=0.5;AC=1;AN=2;DP4=4,1,4,2;MQ=20	GT:PL	0/1:68,0,52
Ref_Crab_Transcript_30830_681	226	T	C	49.0695	DP=11;VDB=0.97935;SGB=-0.636426;RPB=0.924449;MQB=0.964642;MQSB=0.950952;BQB=0.924449;MQ0F=0;ICB=1;HOB=0.5;AC=1;AN=2;DP4=2,2,4,3;MQ=20	GT:PL	0/1:82,0,42
Ref_Crab_Transcript_30859_438	120	C	A	54	DP=13;VDB=0.452509;SGB=-0.651104;RPB=0.765017;MQB=1;MQSB=1;BQB=0.591555;MQ0F=0;ICB=1;HOB=0.5;AC=1;AN=2;DP4=5,0,5,3;MQ=20	GT:PL	0/1:87,0,39
Ref_Crab_Transcript_30867_381	66	G	T	75	DP=20;VDB=0.0167782;SGB=-0.683931;RPB=0.992961;MQB=1;MQSB=1;BQB=0.516786;MQ0F=0;ICB=1;HOB=0.5;AC=1;AN=2;DP4=6,1,9,4;MQ=20	GT:PL	0/1:108,0,50
Ref_Crab_Transcript_30896_592	149	T	C	72	DP=84;VDB=0.809872;SGB=-0.693136;RPB=0.969078;MQB=1;MQSB=1;BQB=0.712409;MQ0F=0;ICB=1;HOB=0.5;AC=1;AN=2;DP4=31,11,27,8;MQ=20	GT:PL	0/1:105,0,122
Ref_Crab_Transcript_30907_1329	1262	A	G	31.0892	DP=11;VDB=0.0149992;SGB=-0.556411;RPB=-;MQB=-;MQSB=-;BQB=-;MQ0F=0;ICB=-;HOB=-;AC=2;AN=2;DP4=0,0,4,0;MQ=20	GT:PL	1/1:58,12,0
Ref_Crab_Transcript_30909_1057	696	C	T	38.8269	DP=34;VDB=0.867225;SGB=-0.676189;RPB=0.967344;MQB=1;MQSB=1;BQB=0.405469;MQ0F=0;ICB=1;HOB=0.5;AC=1;AN=2;DP4=11,12,6,5;MQ=20	GT:PL	0/1:72,0,144
Ref_Crab_Transcript_30933_541	205	G	A	33.406	DP=12;VDB=0.397713;SGB=-0.616816;RPB=0.372712;MQB=0.982603;MQSB=0.95494;BQB=0.931779;MQ0F=0;ICB=1;HOB=0.5;AC=1;AN=2;DP4=3,3,4,2;MQ=20	GT:PL	0/1:66,0,69
Ref_Crab_Transcript_30935_3650	2641	A	G	86	DP=205;VDB=0.975601;SGB=-0.693147;RPB=0.726983;MQB=1;MQSB=1;BQB=0.827486;MQ0F=0;ICB=1;HOB=0.5;AC=1;AN=2;DP4=60,58,38,46;MQ=20	GT:PL	0/1:119,0,147
Ref_Crab_Transcript_30950_528	70	C	T	34.376	DP=11;VDB=0.186688;SGB=-0.616816;RPB=0.683497;MQB=0.950952;MQSB=0.964642;BQB=0.475476;MQ0F=0;ICB=1;HOB=0.5;AC=1;AN=2;DP4=3,2,4,2;MQ=20	GT:PL	0/1:67,0,57
Ref_Crab_Transcript_30967_324	62	C	T	42.82	DP=82;VDB=0.00349936;SGB=-0.692831;RPB=0.184017;MQB=1;MQSB=1;BQB=0.0682751;MQ0F=0;ICB=1;HOB=0.5;AC=1;AN=2;DP4=26,25,16,8;MQ=20	GT:PL	0/1:76,0,139
Ref_Crab_Transcript_30967_324	235	C	T	110	DP=105;VDB=0.00110516;SGB=-0.693147;RPB=0.812467;MQB=1;MQSB=1;BQB=0.241783;MQ0F=0;ICB=1;HOB=0.5;AC=1;AN=2;DP4=23,24,28,27;MQ=20	GT:PL	0/1:143,0,134
Ref_Crab_Transcript_30967_324	248	G	T	90	DP=96;VDB=0.0585311;SGB=-0.693079;RPB=0.928223;MQB=1;MQSB=1;BQB=0.656483;MQ0F=0;ICB=1;HOB=0.5;AC=1;AN=2;DP4=20,18,16,13;MQ=20	GT:PL	0/1:123,0,145
Ref_Crab_Transcript_30967_324	251	C	T	90	DP=64;VDB=0.0169975;SGB=-0.693021;RPB=0.964272;MQB=1;MQSB=1;BQB=0.796612;MQ0F=0;ICB=1;HOB=0.5;AC=1;AN=2;DP4=19,16,15,12;MQ=20	GT:PL	0/1:123,0,143
Ref_Crab_Transcript_30967_324	261	T	C	104	DP=82;VDB=0.00368583;SGB=-0.693146;RPB=0.0628227;MQB=1;MQSB=1;BQB=0.0393962;MQ0F=0;ICB=1;HOB=0.5;AC=1;AN=2;DP4=20,18,25,19;MQ=20	GT:PL	0/1:137,0,133
Ref_Crab_Transcript_30967_324	295	G	T	64	DP=36;VDB=0.000182922;SGB=-0.686358;RPB=0.908641;MQB=1;MQSB=1;BQB=0.964369;MQ0F=0;ICB=1;HOB=0.5;AC=1;AN=2;DP4=8,13,8,6;MQ=20	GT:PL	0/1:97,0,139
Ref_Crab_Transcript_30967_324	300	T	A	62	DP=31;VDB=6.52913e-05;SGB=-0.680642;RPB=0.997797;MQB=1;MQSB=1;BQB=0.20027;MQ0F=0;ICB=1;HOB=0.5;AC=1;AN=2;DP4=6,11,6,6;MQ=20	GT:PL	0/1:95,0,126
Ref_Crab_Transcript_30969_314	220	C	A	50	DP=12;VDB=0.0665174;SGB=-0.636426;RPB=0.442128;MQB=0.964642;MQSB=1;BQB=0.964642;MQ0F=0;ICB=1;HOB=0.5;AC=1;AN=2;DP4=0,4,3,4;MQ=20	GT:PL	0/1:83,0,33
Ref_Crab_Transcript_30973_402	310	T	A	42.4042	DP=14;VDB=0.473537;SGB=-0.636426;RPB=0.885987;MQB=0.966012;MQSB=1;BQB=0.948864;MQ0F=0;ICB=1;HOB=0.5;AC=1;AN=2;DP4=1,6,3,4;MQ=20	GT:PL	0/1:75,0,66
Ref_Crab_Transcript_30990_499	28	G	A	39.6699	DP=106;VDB=3.93011e-06;SGB=-0.69312;RPB=0.758657;MQB=1;MQSB=1;BQB=0.920875;MQ0F=0;ICB=1;HOB=0.5;AC=1;AN=2;DP4=41,33,14,18;MQ=20	GT:PL	0/1:73,0,124
Ref_Crab_Transcript_30990_499	151	A	C	53	DP=190;VDB=0.976929;SGB=-0.693147;RPB=0.717004;MQB=1;MQSB=1;BQB=0.0506616;MQ0F=0;ICB=1;HOB=0.5;AC=1;AN=2;DP4=42,72,23,38;MQ=20	GT:PL	0/1:86,0,141
Ref_Crab_Transcript_30990_499	185	A	C	109	DP=173;VDB=0.000446733;SGB=-0.693147;RPB=0.699488;MQB=1;MQSB=1;BQB=0.73929;MQ0F=0;ICB=1;HOB=0.5;AC=1;AN=2;DP4=33,52,37,46;MQ=20	GT:PL	0/1:142,0,147
Ref_Crab_Transcript_30990_499	212	A	G	73	DP=203;VDB=0.0735084;SGB=-0.693147;RPB=0.190328;MQB=1;MQSB=1;BQB=0.152363;MQ0F=0;ICB=1;HOB=0.5;AC=1;AN=2;DP4=52,69,33,44;MQ=20	GT:PL	0/1:106,0,147
Ref_Crab_Transcript_31008_1382	624	T	C	32.2653	DP=4340;VDB=0.90727;SGB=-0.693147;RPB=0.10107;MQB=1;MQSB=1;BQB=2.58738e-08;MQ0F=0;ICB=1;HOB=0.5;AC=1;AN=2;DP4=1460,1032,965,756;MQ=20	GT:PL	0/1:65,0,126
Ref_Crab_Transcript_31008_1382	962	T	G	86	DP=4840;VDB=0.667665;SGB=-0.693147;RPB=0.766334;MQB=1;MQSB=1;BQB=3.1427e-12;MQ0F=0;ICB=1;HOB=0.5;AC=1;AN=2;DP4=1317,1479,864,1048;MQ=20	GT:PL	0/1:119,0,154
Ref_Crab_Transcript_31011_2659	2001	G	C	96	DP=91;VDB=0.670376;SGB=-0.693144;RPB=0.975385;MQB=1;MQSB=1;BQB=0.914916;MQ0F=0;ICB=1;HOB=0.5;AC=1;AN=2;DP4=18,32,19,20;MQ=20	GT:PL	0/1:129,0,150
Ref_Crab_Transcript_31050_1019	104	T	A	76	DP=26;VDB=3.45801e-05;SGB=-0.688148;RPB=0.801285;MQB=1;MQSB=1;BQB=0.993865;MQ0F=0;ICB=1;HOB=0.5;AC=1;AN=2;DP4=4,6,3,12;MQ=20	GT:PL	0/1:109,0,84
Ref_Crab_Transcript_31050_1019	111	C	T	72	DP=22;VDB=1.97649e-05;SGB=-0.676189;RPB=0.793727;MQB=1;MQSB=1;BQB=0.823561;MQ0F=0;ICB=1;HOB=0.5;AC=1;AN=2;DP4=4,1,3,8;MQ=20	GT:PL	0/1:105,0,39
Ref_Crab_Transcript_31050_1019	117	A	C	48.3702	DP=35;VDB=0.000225631;SGB=-0.651104;RPB=0.0521764;MQB=1;MQSB=1;BQB=0.959011;MQ0F=0;ICB=1;HOB=0.5;AC=1;AN=2;DP4=6,1,2,6;MQ=20	GT:PL	0/1:81,0,59
Ref_Crab_Transcript_31075_445	340	G	C	81	DP=50;VDB=0.210173;SGB=-0.692067;RPB=0.0568879;MQB=1;MQSB=1;BQB=0.673712;MQ0F=0;ICB=1;HOB=0.5;AC=1;AN=2;DP4=9,19,7,13;MQ=20	GT:PL	0/1:114,0,144
Ref_Crab_Transcript_31084_589	150	C	T	41.9682	DP=29;VDB=0.0823973;SGB=-0.670168;RPB=0.909373;MQB=1;MQSB=1;BQB=0.962814;MQ0F=0;ICB=1;HOB=0.5;AC=1;AN=2;DP4=12,7,4,6;MQ=20	GT:PL	0/1:75,0,128
Ref_Crab_Transcript_31084_589	185	A	G	32.9841	DP=23;VDB=0.27141;SGB=-0.651104;RPB=0.84472;MQB=1;MQSB=1;BQB=0.722151;MQ0F=0;ICB=1;HOB=0.5;AC=1;AN=2;DP4=7,8,3,5;MQ=20	GT:PL	0/1:66,0,127
Ref_Crab_Transcript_31086_874	721	T	C	59	DP=27;VDB=0.674631;SGB=-0.680642;RPB=0.92664;MQB=1;MQSB=1;BQB=0.999702;MQ0F=0;ICB=1;HOB=0.5;AC=1;AN=2;DP4=6,9,3,9;MQ=20	GT:PL	0/1:92,0,121
Ref_Crab_Transcript_31087_483	164	A	G	96	DP=27;VDB=0.529791;SGB=-0.689466;RPB=0.495036;MQB=1;MQSB=1;BQB=0.700784;MQ0F=0;ICB=1;HOB=0.5;AC=1;AN=2;DP4=4,6,7,9;MQ=20	GT:PL	0/1:129,0,82
Ref_Crab_Transcript_31091_308	1	G	C	41.6091	DP=12;VDB=8.25997e-06;SGB=-0.662043;RPB=1;MQB=1;MQSB=1;BQB=0.151887;MQ0F=0;ICB=1;HOB=0.5;AC=1;AN=2;DP4=0,3,2,7;MQ=20	GT:PL	0/1:75,0,19
Ref_Crab_Transcript_31114_1750	823	A	T	75	DP=113;VDB=0.866131;SGB=-0.693147;RPB=0.898894;MQB=1;MQSB=1;BQB=0.853166;MQ0F=0;ICB=1;HOB=0.5;AC=1;AN=2;DP4=12,16,44,39;MQ=20	GT:PL	0/1:109,0,37
Ref_Crab_Transcript_31138_1333	477	G	A	100	DP=78;VDB=0.602733;SGB=-0.693145;RPB=0.670155;MQB=1;MQSB=1;BQB=0.367716;MQ0F=0;ICB=1;HOB=0.5;AC=1;AN=2;DP4=21,17,24,16;MQ=20	GT:PL	0/1:133,0,135
Ref_Crab_Transcript_31138_1333	500	G	A	88	DP=88;VDB=0.837744;SGB=-0.693146;RPB=0.206803;MQB=1;MQSB=1;BQB=1;MQ0F=0;ICB=1;HOB=0.5;AC=1;AN=2;DP4=26,16,32,12;MQ=20	GT:PL	0/1:121,0,131
Ref_Crab_Transcript_31154_586	410	C	G	46.3235	DP=23;VDB=0.171769;SGB=-0.676189;RPB=0.999527;MQB=1;MQSB=1;BQB=0.995748;MQ0F=0;ICB=1;HOB=0.5;AC=1;AN=2;DP4=8,4,7,4;MQ=20	GT:PL	0/1:79,0,99
Ref_Crab_Transcript_31158_346	66	A	G	44.0753	DP=11;VDB=0.556801;SGB=-0.636426;RPB=0.442128;MQB=0.964642;MQSB=1;BQB=0.924449;MQ0F=0;ICB=1;HOB=0.5;AC=1;AN=2;DP4=4,0,5,2;MQ=20	GT:PL	0/1:77,0,33
Ref_Crab_Transcript_31173_755	395	A	G	31.1322	DP=10;VDB=0.251321;SGB=-0.590765;RPB=0.600535;MQB=0.900802;MQSB=0.992367;BQB=0.450401;MQ0F=0;ICB=1;HOB=0.5;AC=1;AN=2;DP4=1,2,3,2;MQ=20	GT:PL	0/1:64,0,34
Ref_Crab_Transcript_31177_579	283	A	C	32.3872	DP=15;VDB=0.0269308;SGB=-0.636426;RPB=0.961166;MQB=0.961166;MQSB=1;BQB=0.961166;MQ0F=0;ICB=1;HOB=0.5;AC=1;AN=2;DP4=2,4,1,6;MQ=20	GT:PL	0/1:65,0,64
Ref_Crab_Transcript_31207_649	540	T	A	110	DP=128;VDB=1.94766e-10;SGB=-0.693147;RPB=0.976537;MQB=1;MQSB=1;BQB=0.56487;MQ0F=0;ICB=1;HOB=0.5;AC=1;AN=2;DP4=25,33,27,36;MQ=20	GT:PL	0/1:143,0,140
Ref_Crab_Transcript_31219_622	496	G	A	35.6881	DP=47;VDB=0.00840499;SGB=-0.688148;RPB=0.541959;MQB=1;MQSB=1;BQB=0.914729;MQ0F=0;ICB=1;HOB=0.5;AC=1;AN=2;DP4=14,18,4,11;MQ=20	GT:PL	0/1:69,0,148
Ref_Crab_Transcript_31235_629	193	A	G	59	DP=18;VDB=0.0336456;SGB=-0.683931;RPB=0.149163;MQB=1;MQSB=1;BQB=0.601066;MQ0F=0;ICB=1;HOB=0.5;AC=1;AN=2;DP4=3,0,11,2;MQ=20	GT:PL	0/1:90,0,6
Ref_Crab_Transcript_31240_409	244	G	T	79	DP=18;VDB=0.309523;SGB=-0.680642;RPB=0.982609;MQB=1;MQSB=1;BQB=0.559874;MQ0F=0;ICB=1;HOB=0.5;AC=1;AN=2;DP4=4,2,7,5;MQ=20	GT:PL	0/1:112,0,48
Ref_Crab_Transcript_31311_1504	959	T	C	60	DP=25;VDB=0.0387809;SGB=-0.676189;RPB=0.713793;MQB=1;MQSB=1;BQB=0.43712;MQ0F=0;ICB=1;HOB=0.5;AC=1;AN=2;DP4=7,7,6,5;MQ=20	GT:PL	0/1:93,0,118
Ref_Crab_Transcript_31330_407	135	C	T	46.282	DP=24;VDB=0.364597;SGB=-0.670168;RPB=0.748477;MQB=1;MQSB=1;BQB=0.591555;MQ0F=0;ICB=1;HOB=0.5;AC=1;AN=2;DP4=11,3,7,3;MQ=20	GT:PL	0/1:79,0,98
Ref_Crab_Transcript_31351_354	100	T	C	67	DP=16;VDB=0.244343;SGB=-0.670168;RPB=0.910176;MQB=1;MQSB=1;BQB=0.490777;MQ0F=0;ICB=1;HOB=0.5;AC=1;AN=2;DP4=5,1,6,4;MQ=20	GT:PL	0/1:100,0,50
Ref_Crab_Transcript_31353_369	281	G	A	51	DP=10;VDB=0.276556;SGB=-0.636426;RPB=0.274945;MQB=0.916482;MQSB=1.00775;BQB=0.916482;MQ0F=0;ICB=1;HOB=0.5;AC=1;AN=2;DP4=2,1,4,3;MQ=20	GT:PL	0/1:84,0,28
Ref_Crab_Transcript_31354_360	31	G	A	60	DP=10;VDB=8.95587e-05;SGB=-0.651104;RPB=0;MQB=1;MQSB=0.952347;BQB=0;MQ0F=0;ICB=1;HOB=0.5;AC=1;AN=2;DP4=0,2,5,3;MQ=20	GT:PL	0/1:92,0,8
Ref_Crab_Transcript_31354_360	33	G	A	60	DP=10;VDB=8.95587e-05;SGB=-0.651104;RPB=0;MQB=1;MQSB=0.952347;BQB=0.5;MQ0F=0;ICB=1;HOB=0.5;AC=1;AN=2;DP4=0,2,5,3;MQ=20	GT:PL	0/1:92,0,8
Ref_Crab_Transcript_31354_360	44	A	G	104	DP=12;VDB=0.001387;SGB=-0.676189;RPB=1;MQB=1;MQSB=0.95494;BQB=1;MQ0F=0;ICB=-;HOB=-;AC=2;AN=2;DP4=0,1,5,6;MQ=20	GT:PL	1/1:131,16,0
Ref_Crab_Transcript_31354_360	46	A	G	47.2821	DP=12;VDB=0.000415642;SGB=-0.636426;RPB=0.0389771;MQB=0.95494;MQSB=0.95494;BQB=0.40926;MQ0F=0;ICB=1;HOB=0.5;AC=1;AN=2;DP4=1,4,4,3;MQ=20	GT:PL	0/1:80,0,51
Ref_Crab_Transcript_31354_360	49	G	A	47.2821	DP=12;VDB=0.000415642;SGB=-0.636426;RPB=0.0389771;MQB=0.95494;MQSB=0.95494;BQB=0.584657;MQ0F=0;ICB=1;HOB=0.5;AC=1;AN=2;DP4=1,4,4,3;MQ=20	GT:PL	0/1:80,0,51
Ref_Crab_Transcript_31354_360	50	T	C	104	DP=12;VDB=0.001387;SGB=-0.676189;RPB=1;MQB=1;MQSB=0.95494;BQB=1;MQ0F=0;ICB=-;HOB=-;AC=2;AN=2;DP4=0,1,5,6;MQ=20	GT:PL	1/1:131,16,0
Ref_Crab_Transcript_31354_360	75	C	G	78	DP=20;VDB=0.0576113;SGB=-0.680642;RPB=0.00380165;MQB=1;MQSB=1;BQB=0.914584;MQ0F=0;ICB=1;HOB=0.5;AC=1;AN=2;DP4=4,3,7,5;MQ=20	GT:PL	0/1:111,0,63
Ref_Crab_Transcript_31354_360	84	T	C	79	DP=20;VDB=0.0122606;SGB=-0.680642;RPB=0.00105192;MQB=1;MQSB=1;BQB=0.720273;MQ0F=0;ICB=1;HOB=0.5;AC=1;AN=2;DP4=5,3,6,6;MQ=20	GT:PL	0/1:112,0,71
Ref_Crab_Transcript_31354_360	273	T	G	31.0717	DP=22;VDB=0.549853;SGB=-0.651104;RPB=0.892142;MQB=1;MQSB=1;BQB=0.307539;MQ0F=0;ICB=1;HOB=0.5;AC=1;AN=2;DP4=8,6,2,6;MQ=20	GT:PL	0/1:64,0,120
Ref_Crab_Transcript_31439_440	37	C	T	112	DP=10;VDB=0.000100675;SGB=-0.670168;RPB=-;MQB=-;MQSB=0.952347;BQB=-;MQ0F=0;ICB=-;HOB=-;AC=2;AN=2;DP4=0,0,5,5;MQ=20	GT:PL	1/1:139,30,0
Ref_Crab_Transcript_31439_440	47	C	G	85	DP=16;VDB=0.000100577;SGB=-0.680642;RPB=0.0342181;MQB=1;MQSB=1;BQB=0.352866;MQ0F=0;ICB=1;HOB=0.5;AC=1;AN=2;DP4=1,2,5,7;MQ=20	GT:PL	0/1:119,0,13
Ref_Crab_Transcript_31489_336	201	G	T	37.0869	DP=11;VDB=0.211175;SGB=-0.636426;RPB=0.924449;MQB=0.964642;MQSB=1;BQB=0.241161;MQ0F=0;ICB=1;HOB=0.5;AC=1;AN=2;DP4=2,2,6,1;MQ=20	GT:PL	0/1:70,0,42
Ref_Crab_Transcript_31505_500	249	T	A	104	DP=11;VDB=0.746772;SGB=-0.662043;RPB=-;MQB=-;MQSB=0.974597;BQB=-;MQ0F=0;ICB=-;HOB=-;AC=2;AN=2;DP4=0,0,4,5;MQ=20	GT:PL	1/1:131,27,0
Ref_Crab_Transcript_31527_698	562	G	A	50	DP=47;VDB=0.478;SGB=-0.690438;RPB=0.905813;MQB=1;MQSB=1;BQB=0.623794;MQ0F=0;ICB=1;HOB=0.5;AC=1;AN=2;DP4=6,22,3,14;MQ=20	GT:PL	0/1:83,0,134
Ref_Crab_Transcript_31536_980	788	A	T	57	DP=18;VDB=0.642877;SGB=-0.662043;RPB=0.77073;MQB=1;MQSB=1;BQB=0.995381;MQ0F=0;ICB=1;HOB=0.5;AC=1;AN=2;DP4=4,4,5,4;MQ=20	GT:PL	0/1:90,0,81
Ref_Crab_Transcript_31554_457	53	T	C	31.6889	DP=132;VDB=2.2849e-06;SGB=-0.693145;RPB=0.724929;MQB=1;MQSB=1;BQB=0.968655;MQ0F=0;ICB=1;HOB=0.5;AC=1;AN=2;DP4=56,35,20,20;MQ=20	GT:PL	0/1:65,0,115
Ref_Crab_Transcript_31554_457	169	G	C	60	DP=51;VDB=4.64257e-08;SGB=-0.693054;RPB=0.753453;MQB=1;MQSB=1;BQB=0.387033;MQ0F=0;ICB=1;HOB=0.5;AC=1;AN=2;DP4=3,19,2,26;MQ=20	GT:PL	0/1:93,0,96
Ref_Crab_Transcript_31630_478	391	C	G	46.24	DP=21;VDB=0.00701511;SGB=-0.556411;RPB=-;MQB=-;MQSB=1;BQB=-;MQ0F=0;ICB=-;HOB=-;AC=2;AN=2;DP4=0,0,2,2;MQ=20	GT:PL	1/1:73,12,0
Ref_Crab_Transcript_31638_392	278	G	A	38.6568	DP=51;VDB=0.754234;SGB=-0.688148;RPB=0.963903;MQB=1;MQSB=1;BQB=0.974392;MQ0F=0;ICB=1;HOB=0.5;AC=1;AN=2;DP4=5,29,5,10;MQ=20	GT:PL	0/1:72,0,124
Ref_Crab_Transcript_31676_1369	645	A	G	33.406	DP=12;VDB=0.335973;SGB=-0.616816;RPB=0.660716;MQB=0.982603;MQSB=0.982603;BQB=0.864013;MQ0F=0;ICB=1;HOB=0.5;AC=1;AN=2;DP4=2,4,4,2;MQ=20	GT:PL	0/1:66,0,66
Ref_Crab_Transcript_31679_397	308	T	C	41.4045	DP=16;VDB=0.907611;SGB=-0.636426;RPB=0.640197;MQB=0.966012;MQSB=1;BQB=0.885987;MQ0F=0;ICB=1;HOB=0.5;AC=1;AN=2;DP4=2,5,2,5;MQ=20	GT:PL	0/1:74,0,74
Ref_Crab_Transcript_31686_547	399	A	G	40.2273	DP=20;VDB=0.471462;SGB=-0.651104;RPB=0.720273;MQB=1;MQSB=1;BQB=0.581345;MQ0F=0;ICB=1;HOB=0.5;AC=1;AN=2;DP4=3,9,3,5;MQ=20	GT:PL	0/1:73,0,104
Ref_Crab_Transcript_31723_402	280	C	G	59	DP=36;VDB=0.0202336;SGB=-0.686358;RPB=0.320323;MQB=1;MQSB=1;BQB=0.632429;MQ0F=0;ICB=1;HOB=0.5;AC=1;AN=2;DP4=4,18,4,10;MQ=20	GT:PL	0/1:92,0,121
Ref_Crab_Transcript_31728_1151	1	T	A	33.1656	DP=15;VDB=2.7432e-08;SGB=-0.683931;RPB=0.923077;MQB=1;MQSB=1;BQB=0.730769;MQ0F=0;ICB=-;HOB=-;AC=2;AN=2;DP4=0,2,1,12;MQ=20	GT:PL	1/1:60,2,0
Ref_Crab_Transcript_31728_1151	2	G	C	63	DP=21;VDB=5.62631e-10;SGB=-0.688148;RPB=0.533333;MQB=1;MQSB=1;BQB=0.6;MQ0F=0;ICB=-;HOB=-;AC=2;AN=2;DP4=0,2,2,13;MQ=20	GT:PL	1/1:90,10,0
Ref_Crab_Transcript_31733_343	162	G	C	30.3415	DP=11;VDB=0.886426;SGB=-0.590765;RPB=0.89338;MQB=0.974597;MQSB=0.974597;BQB=0.162433;MQ0F=0;ICB=1;HOB=0.5;AC=1;AN=2;DP4=2,2,2,3;MQ=20	GT:PL	0/1:63,0,46
Ref_Crab_Transcript_31735_309	160	G	T	47.3893	DP=17;VDB=0.149896;SGB=-0.662043;RPB=0.971479;MQB=1;MQSB=1;BQB=0.944865;MQ0F=0;ICB=1;HOB=0.5;AC=1;AN=2;DP4=3,5,7,2;MQ=20	GT:PL	0/1:80,0,81
Ref_Crab_Transcript_31736_425	213	T	G	34.7972	DP=11;VDB=0.892439;SGB=-0.636426;RPB=0.916482;MQB=0.916482;MQSB=1;BQB=0.824834;MQ0F=0;ICB=1;HOB=0.5;AC=1;AN=2;DP4=3,0,6,1;MQ=20	GT:PL	0/1:68,0,23
Ref_Crab_Transcript_31737_318	264	G	C	62	DP=14;VDB=2.28892e-06;SGB=-0.676189;RPB=0.927041;MQB=1;MQSB=1;BQB=0.896649;MQ0F=0;ICB=1;HOB=0.5;AC=1;AN=2;DP4=2,1,2,9;MQ=20	GT:PL	0/1:96,0,16
Ref_Crab_Transcript_31742_1257	828	A	G	51	DP=74;VDB=0.296356;SGB=-0.692717;RPB=0.711373;MQB=1;MQSB=1;BQB=0.866951;MQ0F=0;ICB=1;HOB=0.5;AC=1;AN=2;DP4=29,21,11,12;MQ=20	GT:PL	0/1:84,0,136
Ref_Crab_Transcript_31754_650	171	G	T	64	DP=522;VDB=0.00352205;SGB=-0.693147;RPB=0.900973;MQB=1;MQSB=1;BQB=0.0173578;MQ0F=0;ICB=1;HOB=0.5;AC=1;AN=2;DP4=203,86,134,69;MQ=20	GT:PL	0/1:97,0,136
Ref_Crab_Transcript_31780_639	147	C	T	62	DP=361;VDB=0.258819;SGB=-0.693147;RPB=0.96386;MQB=1;MQSB=1;BQB=0.988195;MQ0F=0;ICB=1;HOB=0.5;AC=1;AN=2;DP4=113,109,64,66;MQ=20	GT:PL	0/1:95,0,145
Ref_Crab_Transcript_31801_525	288	C	T	62	DP=128;VDB=0.0773754;SGB=-0.693145;RPB=0.999996;MQB=1;MQSB=1;BQB=0.991035;MQ0F=0;ICB=1;HOB=0.5;AC=1;AN=2;DP4=28,50,16,25;MQ=20	GT:PL	0/1:95,0,145
Ref_Crab_Transcript_31801_525	405	G	T	103	DP=55;VDB=0.185222;SGB=-0.693021;RPB=0.982998;MQB=1;MQSB=1;BQB=0.979799;MQ0F=0;ICB=1;HOB=0.5;AC=1;AN=2;DP4=9,19,12,15;MQ=20	GT:PL	0/1:136,0,138
Ref_Crab_Transcript_31827_883	467	T	C	32.3808	DP=13;VDB=0.789228;SGB=-0.616816;RPB=0.695312;MQB=0.961166;MQSB=0.961166;BQB=0.920266;MQ0F=0;ICB=1;HOB=0.5;AC=1;AN=2;DP4=5,2,2,4;MQ=20	GT:PL	0/1:65,0,73
Ref_Crab_Transcript_31827_883	574	T	A	45.3786	DP=15;VDB=0.283845;SGB=-0.636426;RPB=0.112477;MQB=0.961166;MQSB=0.961166;BQB=0.777113;MQ0F=0;ICB=1;HOB=0.5;AC=1;AN=2;DP4=3,3,4,3;MQ=20	GT:PL	0/1:78,0,66
Ref_Crab_Transcript_31856_344	215	G	T	61	DP=11;VDB=0.985505;SGB=-0.651104;RPB=0.829029;MQB=1;MQSB=0.964642;BQB=0.594025;MQ0F=0;ICB=1;HOB=0.5;AC=1;AN=2;DP4=0,3,4,4;MQ=20	GT:PL	0/1:94,0,20
Ref_Crab_Transcript_31892_439	227	C	A	61	DP=16;VDB=0.166412;SGB=-0.662043;RPB=0.476686;MQB=1;MQSB=1;BQB=0.729697;MQ0F=0;ICB=1;HOB=0.5;AC=1;AN=2;DP4=1,6,4,5;MQ=20	GT:PL	0/1:94,0,62
Ref_Crab_Transcript_31895_682	479	A	T	62	DP=17;VDB=0.73483;SGB=-0.670168;RPB=0.655816;MQB=1;MQSB=1;BQB=1;MQ0F=0;ICB=1;HOB=0.5;AC=1;AN=2;DP4=5,0,7,3;MQ=20	GT:PL	0/1:95,0,34
Ref_Crab_Transcript_31896_510	331	A	G	98	DP=34;VDB=0.106656;SGB=-0.692067;RPB=0.477524;MQB=1;MQSB=1;BQB=0.858374;MQ0F=0;ICB=1;HOB=0.5;AC=1;AN=2;DP4=8,5,12,8;MQ=20	GT:PL	0/1:131,0,91
Ref_Crab_Transcript_31903_303	203	G	C	85	DP=11;VDB=0.380722;SGB=-0.662043;RPB=1;MQB=1;MQSB=0.952347;BQB=1;MQ0F=0;ICB=-;HOB=-;AC=2;AN=2;DP4=0,1,5,4;MQ=20	GT:PL	1/1:112,10,0
Ref_Crab_Transcript_31903_303	222	C	T	51	DP=10;VDB=0.682525;SGB=-0.636426;RPB=0.641538;MQB=0.916482;MQSB=0.952347;BQB=0.916482;MQ0F=0;ICB=1;HOB=0.5;AC=1;AN=2;DP4=1,2,4,3;MQ=20	GT:PL	0/1:84,0,28
Ref_Crab_Transcript_31913_2017	151	A	G	71	DP=72;VDB=0.856862;SGB=-0.693021;RPB=0.616917;MQB=1;MQSB=1;BQB=0.0520832;MQ0F=0;ICB=1;HOB=0.5;AC=1;AN=2;DP4=26,19,16,11;MQ=20	GT:PL	0/1:104,0,141
Ref_Crab_Transcript_31913_2017	1746	C	T	98	DP=36;VDB=0.252766;SGB=-0.692067;RPB=0.929626;MQB=1;MQSB=1;BQB=0.84077;MQ0F=0;ICB=1;HOB=0.5;AC=1;AN=2;DP4=7,9,11,9;MQ=20	GT:PL	0/1:131,0,112
Ref_Crab_Transcript_31923_854	454	T	C	38.3687	DP=11;VDB=0.980969;SGB=-0.616816;RPB=0.891517;MQB=0.950952;MQSB=0.950952;BQB=0.950952;MQ0F=0;ICB=1;HOB=0.5;AC=1;AN=2;DP4=3,2,3,3;MQ=20	GT:PL	0/1:71,0,57
Ref_Crab_Transcript_31933_594	342	G	A	49.0182	DP=50;VDB=0.0892738;SGB=-0.690438;RPB=0.0648749;MQB=1;MQSB=1;BQB=0.38036;MQ0F=0;ICB=1;HOB=0.5;AC=1;AN=2;DP4=18,13,12,5;MQ=20	GT:PL	0/1:82,0,142
Ref_Crab_Transcript_31970_449	376	G	A	53	DP=11;VDB=0.473537;SGB=-0.636426;RPB=0.824834;MQB=0.916482;MQSB=1.00775;BQB=0.183296;MQ0F=0;ICB=1;HOB=0.5;AC=1;AN=2;DP4=1,2,3,4;MQ=20	GT:PL	0/1:86,0,28
Ref_Crab_Transcript_31971_462	79	G	C	39.9071	DP=11;VDB=0.861911;SGB=-0.616816;RPB=0.809011;MQB=0.924584;MQSB=0.924584;BQB=0.462292;MQ0F=0;ICB=1;HOB=0.5;AC=1;AN=2;DP4=2,1,4,2;MQ=20	GT:PL	0/1:73,0,30
Ref_Crab_Transcript_32027_540	362	T	C	109	DP=62;VDB=0.65156;SGB=-0.69311;RPB=0.368109;MQB=1;MQSB=1;BQB=0.390969;MQ0F=0;ICB=1;HOB=0.5;AC=1;AN=2;DP4=13,17,12,19;MQ=20	GT:PL	0/1:142,0,139
Ref_Crab_Transcript_32028_421	90	T	C	49.0695	DP=12;VDB=0.052865;SGB=-0.636426;RPB=0.803868;MQB=0.964642;MQSB=0.950952;BQB=0.924449;MQ0F=0;ICB=1;HOB=0.5;AC=1;AN=2;DP4=2,2,4,3;MQ=20	GT:PL	0/1:82,0,42
Ref_Crab_Transcript_32028_421	219	A	T	48.6714	DP=10;VDB=0.766482;SGB=-0.636426;RPB=0.458241;MQB=0.916482;MQSB=1.00775;BQB=0.824834;MQ0F=0;ICB=1;HOB=0.5;AC=1;AN=2;DP4=2,1,2,5;MQ=20	GT:PL	0/1:82,0,28
Ref_Crab_Transcript_32028_421	220	C	G	48.6714	DP=10;VDB=0.766482;SGB=-0.636426;RPB=0.458241;MQB=0.916482;MQSB=1.00775;BQB=0.916482;MQ0F=0;ICB=1;HOB=0.5;AC=1;AN=2;DP4=2,1,2,5;MQ=20	GT:PL	0/1:82,0,28
Ref_Crab_Transcript_32028_421	222	C	A	48.6714	DP=10;VDB=0.766482;SGB=-0.636426;RPB=0.458241;MQB=0.916482;MQSB=1.00775;BQB=0.824834;MQ0F=0;ICB=1;HOB=0.5;AC=1;AN=2;DP4=2,1,2,5;MQ=20	GT:PL	0/1:82,0,28
Ref_Crab_Transcript_32028_421	223	C	T	48.6714	DP=10;VDB=0.766482;SGB=-0.636426;RPB=0.458241;MQB=0.916482;MQSB=1.00775;BQB=0.458241;MQ0F=0;ICB=1;HOB=0.5;AC=1;AN=2;DP4=2,1,2,5;MQ=20	GT:PL	0/1:82,0,28
Ref_Crab_Transcript_32052_1206	844	T	C	33.82	DP=12;VDB=0.388649;SGB=-0.636426;RPB=0.274945;MQB=0.916482;MQSB=1;BQB=0.916482;MQ0F=0;ICB=1;HOB=0.5;AC=1;AN=2;DP4=1,2,1,6;MQ=20	GT:PL	0/1:67,0,28
Ref_Crab_Transcript_32077_669	98	G	C	38.4047	DP=14;VDB=0.493667;SGB=-0.636426;RPB=0.571605;MQB=0.966012;MQSB=1;BQB=0.834543;MQ0F=0;ICB=1;HOB=0.5;AC=1;AN=2;DP4=4,3,5,2;MQ=20	GT:PL	0/1:71,0,76
Ref_Crab_Transcript_32084_581	338	A	G	40.0008	DP=22;VDB=0.000231971;SGB=-0.662043;RPB=1;MQB=1;MQSB=-;BQB=1;MQ0F=0;ICB=-;HOB=-;AC=2;AN=2;DP4=1,0,9,0;MQ=20	GT:PL	1/1:67,10,0
Ref_Crab_Transcript_32087_728	299	A	C	57	DP=121;VDB=0.14334;SGB=-0.693145;RPB=0.801393;MQB=1;MQSB=1;BQB=0.86189;MQ0F=0;ICB=1;HOB=0.5;AC=1;AN=2;DP4=42,36,22,19;MQ=20	GT:PL	0/1:90,0,134
Ref_Crab_Transcript_32107_480	172	T	C	38.3687	DP=11;VDB=0.700968;SGB=-0.616816;RPB=0.950952;MQB=0.950952;MQSB=0.950952;BQB=0.475476;MQ0F=0;ICB=1;HOB=0.5;AC=1;AN=2;DP4=2,3,3,3;MQ=20	GT:PL	0/1:71,0,57
Ref_Crab_Transcript_32109_556	139	A	T	45.1008	DP=11;VDB=0.266982;SGB=-0.636426;RPB=0.803868;MQB=0.964642;MQSB=0.950952;BQB=0.964642;MQ0F=0;ICB=1;HOB=0.5;AC=1;AN=2;DP4=3,1,3,4;MQ=20	GT:PL	0/1:78,0,38
Ref_Crab_Transcript_32137_611	131	T	C	76	DP=43;VDB=0.403873;SGB=-0.69168;RPB=0.0185677;MQB=1;MQSB=1;BQB=0.586703;MQ0F=0;ICB=1;HOB=0.5;AC=1;AN=2;DP4=18,4,13,6;MQ=20	GT:PL	0/1:109,0,100
Ref_Crab_Transcript_32163_348	100	A	G	30.896	DP=24;VDB=0.62634;SGB=-0.651104;RPB=0.062087;MQB=1;MQSB=1;BQB=0.999531;MQ0F=0;ICB=1;HOB=0.5;AC=1;AN=2;DP4=5,11,4,4;MQ=20	GT:PL	0/1:64,0,127
Ref_Crab_Transcript_32165_608	536	A	G	70	DP=22;VDB=0.13933;SGB=-0.680642;RPB=0.883612;MQB=1;MQSB=1;BQB=0.695144;MQ0F=0;ICB=1;HOB=0.5;AC=1;AN=2;DP4=2,7,3,9;MQ=20	GT:PL	0/1:103,0,76
Ref_Crab_Transcript_32185_628	519	G	A	33.3803	DP=13;VDB=0.724522;SGB=-0.616816;RPB=0.470358;MQB=0.961166;MQSB=0.961166;BQB=0.828239;MQ0F=0;ICB=1;HOB=0.5;AC=1;AN=2;DP4=3,4,3,3;MQ=20	GT:PL	0/1:66,0,79
Ref_Crab_Transcript_32209_306	239	C	T	39.3012	DP=20;VDB=0.0241445;SGB=-0.651104;RPB=0.118756;MQB=1;MQSB=1;BQB=0.711124;MQ0F=0;ICB=1;HOB=0.5;AC=1;AN=2;DP4=1,10,2,6;MQ=20	GT:PL	0/1:72,0,79
Ref_Crab_Transcript_32235_400	302	C	T	58	DP=142;VDB=0.00019308;SGB=-0.693147;RPB=0.0026372;MQB=1;MQSB=1;BQB=0.725136;MQ0F=0;ICB=1;HOB=0.5;AC=1;AN=2;DP4=21,67,10,40;MQ=20	GT:PL	0/1:91,0,151
Ref_Crab_Transcript_32235_400	306	C	T	56	DP=132;VDB=0.000343731;SGB=-0.693147;RPB=0.000780245;MQB=1;MQSB=1;BQB=0.994614;MQ0F=0;ICB=1;HOB=0.5;AC=1;AN=2;DP4=19,60,7,38;MQ=20	GT:PL	0/1:89,0,151
Ref_Crab_Transcript_32265_325	254	G	T	61	DP=20;VDB=0.292426;SGB=-0.676189;RPB=0.998975;MQB=1;MQSB=1;BQB=0.974693;MQ0F=0;ICB=1;HOB=0.5;AC=1;AN=2;DP4=1,6,2,9;MQ=20	GT:PL	0/1:94,0,57
Ref_Crab_Transcript_32287_543	272	A	G	46.3504	DP=18;VDB=0.0189358;SGB=-0.651104;RPB=0.99606;MQB=1;MQSB=1;BQB=0.965097;MQ0F=0;ICB=1;HOB=0.5;AC=1;AN=2;DP4=4,6,4,4;MQ=20	GT:PL	0/1:79,0,99
Ref_Crab_Transcript_32310_322	144	C	T	74	DP=15;VDB=0.00409544;SGB=-0.670168;RPB=0.960789;MQB=1;MQSB=1;BQB=0.298197;MQ0F=0;ICB=1;HOB=0.5;AC=1;AN=2;DP4=3,1,5,5;MQ=20	GT:PL	0/1:107,0,31
Ref_Crab_Transcript_32324_429	145	G	T	54	DP=24;VDB=0.891275;SGB=-0.670168;RPB=0.989343;MQB=1;MQSB=1;BQB=0.998287;MQ0F=0;ICB=1;HOB=0.5;AC=1;AN=2;DP4=9,5,5,5;MQ=20	GT:PL	0/1:87,0,112
Ref_Crab_Transcript_32333_364	151	G	T	57	DP=11;VDB=0.979934;SGB=-0.651104;RPB=0.979382;MQB=1;MQSB=0.964642;BQB=0.979382;MQ0F=0;ICB=1;HOB=0.5;AC=1;AN=2;DP4=2,1,5,3;MQ=20	GT:PL	0/1:91,0,25
Ref_Crab_Transcript_32334_2723	913	C	T	113	DP=194;VDB=0.528527;SGB=-0.693147;RPB=0.414191;MQB=1;MQSB=1;BQB=0.0468623;MQ0F=0;ICB=1;HOB=0.5;AC=1;AN=2;DP4=50,44,35,55;MQ=20	GT:PL	0/1:146,0,142
Ref_Crab_Transcript_32341_566	369	A	G	87	DP=10;VDB=0.561963;SGB=-0.662043;RPB=1;MQB=1;MQSB=0.952347;BQB=1;MQ0F=0;ICB=-;HOB=-;AC=2;AN=2;DP4=1,0,4,5;MQ=20	GT:PL	1/1:114,10,0
Ref_Crab_Transcript_32342_445	76	C	A	31.4069	DP=12;VDB=0.0341101;SGB=-0.616816;RPB=0.864013;MQB=0.982603;MQSB=1;BQB=0.931779;MQ0F=0;ICB=1;HOB=0.5;AC=1;AN=2;DP4=4,2,4,2;MQ=20	GT:PL	0/1:64,0,66
Ref_Crab_Transcript_32354_300	96	G	A	42.2822	DP=13;VDB=0.587934;SGB=-0.636426;RPB=0.6821;MQB=0.95494;MQSB=1;BQB=0.13642;MQ0F=0;ICB=1;HOB=0.5;AC=1;AN=2;DP4=4,1,5,2;MQ=20	GT:PL	0/1:75,0,49
Ref_Crab_Transcript_32399_408	236	A	G	33.3803	DP=13;VDB=0.551573;SGB=-0.616816;RPB=0.695312;MQB=0.961166;MQSB=1;BQB=0.695312;MQ0F=0;ICB=1;HOB=0.5;AC=1;AN=2;DP4=5,2,3,3;MQ=20	GT:PL	0/1:66,0,73
Ref_Crab_Transcript_32411_469	277	C	T	78	DP=81;VDB=0.456083;SGB=-0.693097;RPB=0.720354;MQB=1;MQSB=1;BQB=0.955101;MQ0F=0;ICB=1;HOB=0.5;AC=1;AN=2;DP4=30,20,14,16;MQ=20	GT:PL	0/1:111,0,138
Ref_Crab_Transcript_32413_697	371	G	C	34.4056	DP=12;VDB=0.358309;SGB=-0.616816;RPB=0.813189;MQB=0.931779;MQSB=0.968069;BQB=0.220239;MQ0F=0;ICB=1;HOB=0.5;AC=1;AN=2;DP4=4,2,4,2;MQ=20	GT:PL	0/1:67,0,67
Ref_Crab_Transcript_32429_677	193	C	T	38.3687	DP=11;VDB=0.203362;SGB=-0.616816;RPB=0.475476;MQB=0.950952;MQSB=0.950952;BQB=0.950952;MQ0F=0;ICB=1;HOB=0.5;AC=1;AN=2;DP4=2,3,3,3;MQ=20	GT:PL	0/1:71,0,57
Ref_Crab_Transcript_32429_677	226	T	C	41.2303	DP=10;VDB=0.329692;SGB=-0.616816;RPB=0.783809;MQB=1.00775;MQSB=0.916482;BQB=0.895781;MQ0F=0;ICB=1;HOB=0.5;AC=1;AN=2;DP4=0,4,3,3;MQ=20	GT:PL	0/1:74,0,36
Ref_Crab_Transcript_32437_752	698	C	T	49.9238	DP=62;VDB=0.000101488;SGB=-0.692352;RPB=0.719967;MQB=1;MQSB=1;BQB=0.00779052;MQ0F=0;ICB=1;HOB=0.5;AC=1;AN=2;DP4=6,35,5,16;MQ=20	GT:PL	0/1:83,0,129
Ref_Crab_Transcript_32495_368	222	T	C	57	DP=18;VDB=0.177628;SGB=-0.662043;RPB=0.77918;MQB=1;MQSB=1;BQB=0.984526;MQ0F=0;ICB=1;HOB=0.5;AC=1;AN=2;DP4=4,5,4,5;MQ=20	GT:PL	0/1:90,0,87
Ref_Crab_Transcript_32547_551	235	C	G	117	DP=13;VDB=0.0313511;SGB=-0.683931;RPB=-;MQB=-;MQSB=1;BQB=-;MQ0F=0;ICB=-;HOB=-;AC=2;AN=2;DP4=0,0,9,4;MQ=20	GT:PL	1/1:144,39,0
Ref_Crab_Transcript_32561_847	681	T	C	43.3786	DP=13;VDB=0.162869;SGB=-0.636426;RPB=0.695312;MQB=0.961166;MQSB=0.961166;BQB=0.143152;MQ0F=0;ICB=1;HOB=0.5;AC=1;AN=2;DP4=4,2,2,5;MQ=20	GT:PL	0/1:76,0,63
Ref_Crab_Transcript_32561_847	690	C	T	80	DP=14;VDB=0.00364774;SGB=-0.676189;RPB=0.952672;MQB=1;MQSB=1;BQB=0.230693;MQ0F=0;ICB=1;HOB=0.5;AC=1;AN=2;DP4=1,2,5,6;MQ=20	GT:PL	0/1:114,0,16
Ref_Crab_Transcript_32569_382	277	G	A	89	DP=23;VDB=0.758724;SGB=-0.688148;RPB=0.95869;MQB=1;MQSB=1;BQB=0.173412;MQ0F=0;ICB=1;HOB=0.5;AC=1;AN=2;DP4=3,5,9,6;MQ=20	GT:PL	0/1:122,0,66
Ref_Crab_Transcript_32571_505	346	C	T	46.3553	DP=22;VDB=0.543076;SGB=-0.670168;RPB=0.965815;MQB=1;MQSB=1;BQB=0.0236588;MQ0F=0;ICB=1;HOB=0.5;AC=1;AN=2;DP4=5,7,7,3;MQ=20	GT:PL	0/1:79,0,109
Ref_Crab_Transcript_32576_580	539	C	G	129	DP=46;VDB=3.98563e-05;SGB=-0.693139;RPB=0.82255;MQB=0.515366;MQSB=0.954349;BQB=0.515366;MQ0F=0;ICB=-;HOB=-;AC=2;AN=2;DP4=2,5,17,19;MQ=20	GT:PL	1/1:156,7,0
Ref_Crab_Transcript_32576_580	545	A	T	189	DP=37;VDB=6.67829e-08;SGB=-0.693132;RPB=-;MQB=-;MQSB=0.967072;BQB=-;MQ0F=0;ICB=-;HOB=-;AC=2;AN=2;DP4=0,0,16,18;MQ=20	GT:PL	1/1:216,102,0
Ref_Crab_Transcript_32576_580	557	C	T	175	DP=26;VDB=5.49704e-08;SGB=-0.692976;RPB=-;MQB=-;MQSB=1;BQB=-;MQ0F=0;ICB=-;HOB=-;AC=2;AN=2;DP4=0,0,11,15;MQ=20	GT:PL	1/1:202,78,0
Ref_Crab_Transcript_32576_580	570	T	A	31.1433	DP=15;VDB=0.00506967;SGB=-0.590765;RPB=0.450401;MQB=0.900802;MQSB=0.900802;BQB=0.150134;MQ0F=0;ICB=1;HOB=0.5;AC=1;AN=2;DP4=0,3,3,2;MQ=20	GT:PL	0/1:64,0,29
Ref_Crab_Transcript_32595_1302	487	A	C	47.0849	DP=60;VDB=0.121033;SGB=-0.692067;RPB=0.122059;MQB=1;MQSB=1;BQB=0.642635;MQ0F=0;ICB=1;HOB=0.5;AC=1;AN=2;DP4=15,19,3,17;MQ=20	GT:PL	0/1:80,0,150
Ref_Crab_Transcript_32613_1065	233	G	T	52	DP=15;VDB=0.951403;SGB=-0.651104;RPB=0.981425;MQB=1;MQSB=0.966012;BQB=0.967216;MQ0F=0;ICB=1;HOB=0.5;AC=1;AN=2;DP4=2,4,5,3;MQ=20	GT:PL	0/1:85,0,62
Ref_Crab_Transcript_32613_1065	553	G	T	88	DP=21;VDB=0.550846;SGB=-0.683931;RPB=0.991383;MQB=1;MQSB=1;BQB=0.908324;MQ0F=0;ICB=1;HOB=0.5;AC=1;AN=2;DP4=3,3,6,7;MQ=20	GT:PL	0/1:121,0,50
Ref_Crab_Transcript_32650_491	285	G	A	49.0695	DP=13;VDB=0.674771;SGB=-0.636426;RPB=0.803868;MQB=0.964642;MQSB=0.950952;BQB=0.241161;MQ0F=0;ICB=1;HOB=0.5;AC=1;AN=2;DP4=2,2,4,3;MQ=20	GT:PL	0/1:82,0,42
Ref_Crab_Transcript_32653_755	145	G	A	32.3753	DP=15;VDB=0.724891;SGB=-0.636426;RPB=0.845852;MQB=1;MQSB=1;BQB=0.87319;MQ0F=0;ICB=1;HOB=0.5;AC=1;AN=2;DP4=6,2,5,2;MQ=20	GT:PL	0/1:65,0,77
Ref_Crab_Transcript_32701_615	598	T	G	62	DP=14;VDB=2.32885e-05;SGB=-0.670168;RPB=0.649117;MQB=1;MQSB=1;BQB=0.177538;MQ0F=0;ICB=1;HOB=0.5;AC=1;AN=2;DP4=0,3,2,8;MQ=20	GT:PL	0/1:96,0,15
Ref_Crab_Transcript_32704_661	505	C	G	46.3504	DP=18;VDB=0.44307;SGB=-0.651104;RPB=0.776754;MQB=1;MQSB=1;BQB=0.46131;MQ0F=0;ICB=1;HOB=0.5;AC=1;AN=2;DP4=4,6,4,4;MQ=20	GT:PL	0/1:79,0,99
Ref_Crab_Transcript_32725_591	533	G	A	34.894	DP=28;VDB=0.00498595;SGB=-0.662043;RPB=0.381255;MQB=1;MQSB=1;BQB=0.589135;MQ0F=0;ICB=1;HOB=0.5;AC=1;AN=2;DP4=6,12,4,5;MQ=20	GT:PL	0/1:68,0,133
Ref_Crab_Transcript_32742_990	195	G	A	35.3712	DP=15;VDB=0.192892;SGB=-0.636426;RPB=0.144386;MQB=1;MQSB=1;BQB=0.511891;MQ0F=0;ICB=1;HOB=0.5;AC=1;AN=2;DP4=6,2,4,3;MQ=20	GT:PL	0/1:68,0,77
Ref_Crab_Transcript_32746_445	154	T	C	110	DP=48;VDB=0.851046;SGB=-0.692976;RPB=0.892294;MQB=1;MQSB=1;BQB=0.966114;MQ0F=0;ICB=1;HOB=0.5;AC=1;AN=2;DP4=10,8,13,13;MQ=20	GT:PL	0/1:143,0,108
Ref_Crab_Transcript_32758_755	177	A	G	111	DP=220;VDB=1.19277e-30;SGB=-0.693147;RPB=0.745205;MQB=1;MQSB=1;BQB=0.45485;MQ0F=0;ICB=1;HOB=0.5;AC=1;AN=2;DP4=7,60,16,119;MQ=20	GT:PL	0/1:144,0,53
Ref_Crab_Transcript_32761_325	32	C	G	43.199	DP=17;VDB=0.00911214;SGB=-0.556411;RPB=-;MQB=-;MQSB=1;BQB=-;MQ0F=0;ICB=-;HOB=-;AC=2;AN=2;DP4=0,0,2,2;MQ=20	GT:PL	1/1:70,12,0
Ref_Crab_Transcript_32761_325	33	C	A	30.2178	DP=17;VDB=0.0264014;SGB=-0.511536;RPB=-;MQB=-;MQSB=1;BQB=-;MQ0F=0;ICB=-;HOB=-;AC=2;AN=2;DP4=0,0,1,2;MQ=20	GT:PL	1/1:57,9,0
Ref_Crab_Transcript_32778_866	4	A	T	32.0786	DP=10;VDB=0.00215942;SGB=-0.590765;RPB=0.900802;MQB=0.900802;MQSB=0.900802;BQB=0.600535;MQ0F=0;ICB=1;HOB=0.5;AC=1;AN=2;DP4=1,2,2,3;MQ=20	GT:PL	0/1:65,0,31
Ref_Crab_Transcript_32806_1313	1040	T	A	86	DP=13;VDB=0.00378105;SGB=-0.676189;RPB=0.363636;MQB=1;MQSB=0.961166;BQB=0.545455;MQ0F=0;ICB=-;HOB=-;AC=2;AN=2;DP4=1,1,6,5;MQ=20	GT:PL	1/1:113,0,1
Ref_Crab_Transcript_32806_1313	1044	C	T	86	DP=13;VDB=0.00378105;SGB=-0.676189;RPB=0.363636;MQB=1;MQSB=0.961166;BQB=0.909091;MQ0F=0;ICB=-;HOB=-;AC=2;AN=2;DP4=1,1,6,5;MQ=20	GT:PL	1/1:113,0,1
Ref_Crab_Transcript_32806_1313	1046	C	T	86	DP=13;VDB=0.00451539;SGB=-0.676189;RPB=0.363636;MQB=1;MQSB=0.961166;BQB=0.363636;MQ0F=0;ICB=-;HOB=-;AC=2;AN=2;DP4=1,1,6,5;MQ=20	GT:PL	1/1:113,0,1
Ref_Crab_Transcript_32839_384	110	G	C	52	DP=14;VDB=0.942216;SGB=-0.662043;RPB=0.526122;MQB=1;MQSB=1;BQB=0.99115;MQ0F=0;ICB=1;HOB=0.5;AC=1;AN=2;DP4=3,2,7,2;MQ=20	GT:PL	0/1:85,0,49
Ref_Crab_Transcript_32880_551	155	A	T	43.2044	DP=29;VDB=0.148379;SGB=-0.676189;RPB=0.346609;MQB=1;MQSB=1;BQB=0.885367;MQ0F=0;ICB=1;HOB=0.5;AC=1;AN=2;DP4=12,4,8,3;MQ=20	GT:PL	0/1:76,0,107
Ref_Crab_Transcript_32905_459	109	A	C	52	DP=15;VDB=0.0893345;SGB=-0.662043;RPB=0.945959;MQB=1;MQSB=1;BQB=0.89683;MQ0F=0;ICB=1;HOB=0.5;AC=1;AN=2;DP4=5,0,7,2;MQ=20	GT:PL	0/1:85,0,37
Ref_Crab_Transcript_32910_928	576	T	C	45.1031	DP=10;VDB=0.517234;SGB=-0.616816;RPB=1;MQB=1;MQSB=0.900802;BQB=0.166667;MQ0F=0;ICB=1;HOB=0.5;AC=1;AN=2;DP4=0,2,3,3;MQ=20	GT:PL	0/1:76,0,6
Ref_Crab_Transcript_32910_928	579	A	G	30.1545	DP=10;VDB=0.750478;SGB=-0.590765;RPB=0.900802;MQB=0.900802;MQSB=0.900802;BQB=0.900802;MQ0F=0;ICB=1;HOB=0.5;AC=1;AN=2;DP4=1,2,2,3;MQ=20	GT:PL	0/1:63,0,34
Ref_Crab_Transcript_32931_524	434	T	C	59	DP=13;VDB=0.279378;SGB=-0.651104;RPB=0.878264;MQB=1;MQSB=0.982603;BQB=0.98568;MQ0F=0;ICB=1;HOB=0.5;AC=1;AN=2;DP4=2,2,4,4;MQ=20	GT:PL	0/1:92,0,39
Ref_Crab_Transcript_32955_752	657	T	C	33.3803	DP=13;VDB=0.158046;SGB=-0.616816;RPB=0.0715762;MQB=0.961166;MQSB=1;BQB=0.777113;MQ0F=0;ICB=1;HOB=0.5;AC=1;AN=2;DP4=1,6,3,3;MQ=20	GT:PL	0/1:66,0,68
Ref_Crab_Transcript_32957_566	141	A	G	53	DP=10;VDB=0.808291;SGB=-0.636426;RPB=0.857143;MQB=1;MQSB=0.924584;BQB=0.571429;MQ0F=0;ICB=1;HOB=0.5;AC=1;AN=2;DP4=2,0,4,3;MQ=20	GT:PL	0/1:86,0,11
Ref_Crab_Transcript_32982_659	100	C	G	39.9071	DP=11;VDB=0.9843;SGB=-0.616816;RPB=0.924584;MQB=0.924584;MQSB=0.924584;BQB=0.115573;MQ0F=0;ICB=1;HOB=0.5;AC=1;AN=2;DP4=2,1,4,2;MQ=20	GT:PL	0/1:73,0,30
Ref_Crab_Transcript_33055_513	197	T	C	59	DP=18;VDB=0.633718;SGB=-0.662043;RPB=0.26238;MQB=1;MQSB=1;BQB=0.869318;MQ0F=0;ICB=1;HOB=0.5;AC=1;AN=2;DP4=4,4,4,5;MQ=20	GT:PL	0/1:92,0,81
Ref_Crab_Transcript_33104_304	64	T	A	41.2276	DP=10;VDB=0.530999;SGB=-0.616816;RPB=0.895781;MQB=1.00775;MQSB=0.952347;BQB=0.895781;MQ0F=0;ICB=1;HOB=0.5;AC=1;AN=2;DP4=2,2,3,3;MQ=20	GT:PL	0/1:74,0,45
Ref_Crab_Transcript_33123_485	290	G	A	58	DP=10;VDB=0.994668;SGB=-0.651104;RPB=0.75;MQB=1;MQSB=0.952347;BQB=0.5;MQ0F=0;ICB=1;HOB=0.5;AC=1;AN=2;DP4=2,0,3,5;MQ=20	GT:PL	0/1:90,0,8
Ref_Crab_Transcript_33130_792	634	T	C	76	DP=42;VDB=0.490719;SGB=-0.691153;RPB=0.288921;MQB=1;MQSB=1;BQB=0.14014;MQ0F=0;ICB=1;HOB=0.5;AC=1;AN=2;DP4=7,17,7,11;MQ=20	GT:PL	0/1:109,0,137
Ref_Crab_Transcript_33149_327	8	G	A	30.315	DP=20;VDB=0.000181347;SGB=-0.636426;RPB=0.887766;MQB=1;MQSB=1;BQB=0.367442;MQ0F=0;ICB=1;HOB=0.5;AC=1;AN=2;DP4=7,3,3,4;MQ=20	GT:PL	0/1:63,0,81
Ref_Crab_Transcript_33149_327	19	A	G	64	DP=40;VDB=0.015032;SGB=-0.616816;RPB=-;MQB=-;MQSB=0.861511;BQB=-;MQ0F=0;ICB=-;HOB=-;AC=2;AN=2;DP4=0,0,3,3;MQ=20	GT:PL	1/1:91,18,0
Ref_Crab_Transcript_33149_327	22	A	G	115	DP=41;VDB=4.49939e-11;SGB=-0.693097;RPB=0.6;MQB=1;MQSB=1;BQB=0.0333333;MQ0F=0;ICB=-;HOB=-;AC=2;AN=2;DP4=0,2,23,7;MQ=20	GT:PL	1/1:142,57,0
Ref_Crab_Transcript_33149_327	257	A	T	100	DP=56;VDB=5.16816e-07;SGB=-0.693144;RPB=1.3623e-05;MQB=1;MQSB=1;BQB=0.314261;MQ0F=0;ICB=1;HOB=0.5;AC=1;AN=2;DP4=6,7,23,16;MQ=20	GT:PL	0/1:134,0,50
Ref_Crab_Transcript_33149_327	265	A	G	79	DP=53;VDB=1.84555e-07;SGB=-0.693141;RPB=0.00265539;MQB=1;MQSB=1;BQB=0.0002833;MQ0F=0;ICB=1;HOB=0.5;AC=1;AN=2;DP4=3,7,26,11;MQ=20	GT:PL	0/1:113,0,26
Ref_Crab_Transcript_33153_356	210	C	T	44.4044	DP=14;VDB=0.361296;SGB=-0.636426;RPB=0.834543;MQB=0.966012;MQSB=1;BQB=0.360111;MQ0F=0;ICB=1;HOB=0.5;AC=1;AN=2;DP4=3,4,3,4;MQ=20	GT:PL	0/1:77,0,77
Ref_Crab_Transcript_33170_389	67	T	C	51	DP=46;VDB=0.120921;SGB=-0.691153;RPB=0.925361;MQB=1;MQSB=1;BQB=0.619221;MQ0F=0;ICB=1;HOB=0.5;AC=1;AN=2;DP4=21,7,14,4;MQ=20	GT:PL	0/1:84,0,119
Ref_Crab_Transcript_33172_968	749	G	C	78	DP=16;VDB=0.0974925;SGB=-0.676189;RPB=0.697617;MQB=1;MQSB=1;BQB=0.948127;MQ0F=0;ICB=1;HOB=0.5;AC=1;AN=2;DP4=2,2,4,7;MQ=20	GT:PL	0/1:112,0,31
Ref_Crab_Transcript_33217_881	201	A	C	81	DP=211;VDB=0.632901;SGB=-0.693147;RPB=0.720911;MQB=0.991334;MQSB=0.996444;BQB=0.103061;MQ0F=0;ICB=1;HOB=0.5;AC=1;AN=2;DP4=75,39,64,30;MQ=20	GT:PL	0/1:114,0,137
Ref_Crab_Transcript_33217_881	532	T	C	81	DP=112;VDB=0.163016;SGB=-0.693146;RPB=0.772539;MQB=1;MQSB=1;BQB=0.934299;MQ0F=0;ICB=1;HOB=0.5;AC=1;AN=2;DP4=30,36,20,22;MQ=20	GT:PL	0/1:114,0,146
Ref_Crab_Transcript_33276_525	111	G	A	53	DP=10;VDB=0.308783;SGB=-0.636426;RPB=0.0916482;MQB=0.916482;MQSB=1.00775;BQB=0.824834;MQ0F=0;ICB=1;HOB=0.5;AC=1;AN=2;DP4=3,0,3,4;MQ=20	GT:PL	0/1:86,0,23
Ref_Crab_Transcript_33300_1259	607	A	C	106	DP=127;VDB=0.0282265;SGB=-0.693147;RPB=0.813773;MQB=1;MQSB=1;BQB=0.817832;MQ0F=0;ICB=1;HOB=0.5;AC=1;AN=2;DP4=39,17,37,28;MQ=20	GT:PL	0/1:139,0,118
Ref_Crab_Transcript_33310_328	90	G	T	64	DP=14;VDB=0.0571067;SGB=-0.670168;RPB=0.105399;MQB=1;MQSB=1;BQB=0.697676;MQ0F=0;ICB=1;HOB=0.5;AC=1;AN=2;DP4=2,2,7,3;MQ=20	GT:PL	0/1:97,0,34
Ref_Crab_Transcript_33335_452	366	G	A	58	DP=18;VDB=0.205475;SGB=-0.670168;RPB=1;MQB=1;MQSB=1;BQB=0.99881;MQ0F=0;ICB=1;HOB=0.5;AC=1;AN=2;DP4=2,5,2,8;MQ=20	GT:PL	0/1:91,0,66
Ref_Crab_Transcript_33362_440	346	A	C	59	DP=12;VDB=0.778467;SGB=-0.662043;RPB=0.596251;MQB=1;MQSB=1;BQB=0.707404;MQ0F=0;ICB=1;HOB=0.5;AC=1;AN=2;DP4=2,1,2,7;MQ=20	GT:PL	0/1:93,0,22
Ref_Crab_Transcript_33367_346	144	C	T	86	DP=13;VDB=0.147453;SGB=-0.676189;RPB=0.136364;MQB=1;MQSB=0.961166;BQB=0.863636;MQ0F=0;ICB=-;HOB=-;AC=2;AN=2;DP4=1,1,6,5;MQ=20	GT:PL	1/1:113,0,1
Ref_Crab_Transcript_33367_346	224	T	A	38.9754	DP=13;VDB=0.447786;SGB=-0.651104;RPB=0.838046;MQB=1;MQSB=1;BQB=0.594978;MQ0F=0;ICB=1;HOB=0.5;AC=1;AN=2;DP4=2,2,1,7;MQ=20	GT:PL	0/1:72,0,39
Ref_Crab_Transcript_33371_789	561	A	G	56	DP=23;VDB=0.15979;SGB=-0.670168;RPB=0.31527;MQB=1;MQSB=1;BQB=0.33032;MQ0F=0;ICB=1;HOB=0.5;AC=1;AN=2;DP4=7,6,5,5;MQ=20	GT:PL	0/1:89,0,114
Ref_Crab_Transcript_33385_374	25	A	G	37.0591	DP=29;VDB=0.000803199;SGB=-0.670168;RPB=0.558837;MQB=1;MQSB=1;BQB=0.981777;MQ0F=0;ICB=1;HOB=0.5;AC=1;AN=2;DP4=11,7,7,3;MQ=20	GT:PL	0/1:70,0,124
Ref_Crab_Transcript_33385_374	238	G	A	46.7013	DP=67;VDB=0.0381382;SGB=-0.692352;RPB=0.298799;MQB=1;MQSB=1;BQB=0.485046;MQ0F=0;ICB=1;HOB=0.5;AC=1;AN=2;DP4=29,17,9,12;MQ=20	GT:PL	0/1:80,0,132
Ref_Crab_Transcript_33415_344	97	G	A	49.2598	DP=17;VDB=0.0653842;SGB=-0.662043;RPB=0.105399;MQB=1;MQSB=1;BQB=0.0403538;MQ0F=0;ICB=1;HOB=0.5;AC=1;AN=2;DP4=2,4,2,7;MQ=20	GT:PL	0/1:82,0,60
Ref_Crab_Transcript_33426_329	91	C	T	79	DP=14;VDB=0.295187;SGB=-0.676189;RPB=0.416546;MQB=1;MQSB=1;BQB=0.996974;MQ0F=0;ICB=1;HOB=0.5;AC=1;AN=2;DP4=3,0,6,5;MQ=20	GT:PL	0/1:112,0,12
Ref_Crab_Transcript_33436_414	248	T	C	68	DP=10;VDB=0.3423;SGB=-0.616816;RPB=-;MQB=-;MQSB=1;BQB=-;MQ0F=0;ICB=-;HOB=-;AC=2;AN=2;DP4=0,0,4,2;MQ=20	GT:PL	1/1:95,18,0
Ref_Crab_Transcript_33450_927	95	G	T	39.3362	DP=17;VDB=0.111073;SGB=-0.636426;RPB=0.844114;MQB=1;MQSB=1;BQB=0.965592;MQ0F=0;ICB=1;HOB=0.5;AC=1;AN=2;DP4=6,3,3,4;MQ=20	GT:PL	0/1:72,0,89
Ref_Crab_Transcript_33451_355	189	T	G	38.3688	DP=12;VDB=0.766069;SGB=-0.616816;RPB=0.8618;MQB=0.950952;MQSB=0.964642;BQB=0.891517;MQ0F=0;ICB=1;HOB=0.5;AC=1;AN=2;DP4=4,1,3,3;MQ=20	GT:PL	0/1:71,0,52
Ref_Crab_Transcript_33451_355	219	A	G	48.2821	DP=12;VDB=0.7368;SGB=-0.636426;RPB=0.584657;MQB=0.95494;MQSB=1;BQB=0.584657;MQ0F=0;ICB=1;HOB=0.5;AC=1;AN=2;DP4=1,4,3,4;MQ=20	GT:PL	0/1:81,0,51
Ref_Crab_Transcript_33503_754	553	T	C	38.3687	DP=11;VDB=0.779105;SGB=-0.616816;RPB=0.564628;MQB=0.950952;MQSB=0.950952;BQB=0.891517;MQ0F=0;ICB=1;HOB=0.5;AC=1;AN=2;DP4=2,3,3,3;MQ=20	GT:PL	0/1:71,0,57
Ref_Crab_Transcript_33506_509	197	G	A	38.2412	DP=5485;VDB=0.000946546;SGB=-0.693147;RPB=0.00581862;MQB=1;MQSB=1;BQB=0.000552655;MQ0F=0;ICB=1;HOB=0.5;AC=1;AN=2;DP4=1894,1296,1285,859;MQ=20	GT:PL	0/1:71,0,128
Ref_Crab_Transcript_33523_651	131	G	A	37.3752	DP=13;VDB=0.831298;SGB=-0.616816;RPB=0.950952;MQB=0.950952;MQSB=0.950952;BQB=0.891517;MQ0F=0;ICB=1;HOB=0.5;AC=1;AN=2;DP4=3,2,3,3;MQ=20	GT:PL	0/1:70,0,57
Ref_Crab_Transcript_33523_651	322	C	G	37.9641	DP=10;VDB=0.631962;SGB=-0.616816;RPB=0.462292;MQB=0.924584;MQSB=0.974597;BQB=0.809011;MQ0F=0;ICB=1;HOB=0.5;AC=1;AN=2;DP4=0,3,4,2;MQ=20	GT:PL	0/1:71,0,26
Ref_Crab_Transcript_33572_1157	982	T	A	60	DP=28;VDB=7.33108e-08;SGB=-0.676189;RPB=0.000138503;MQB=1;MQSB=1;BQB=0.0626163;MQ0F=0;ICB=1;HOB=0.5;AC=1;AN=2;DP4=7,7,5,6;MQ=20	GT:PL	0/1:93,0,118
Ref_Crab_Transcript_33602_466	379	T	A	53	DP=10;VDB=0.473537;SGB=-0.636426;RPB=0.916482;MQB=0.916482;MQSB=0.916482;BQB=0.916482;MQ0F=0;ICB=1;HOB=0.5;AC=1;AN=2;DP4=0,3,3,4;MQ=20	GT:PL	0/1:86,0,23
Ref_Crab_Transcript_33603_435	287	C	T	33.1862	DP=18;VDB=0.679949;SGB=-0.636426;RPB=0.995907;MQB=1;MQSB=1;BQB=0.983729;MQ0F=0;ICB=1;HOB=0.5;AC=1;AN=2;DP4=5,6,4,3;MQ=20	GT:PL	0/1:66,0,109
Ref_Crab_Transcript_33610_321	89	T	G	51	DP=10;VDB=0.562494;SGB=-0.636426;RPB=0.916482;MQB=0.916482;MQSB=1.00775;BQB=0.458241;MQ0F=0;ICB=1;HOB=0.5;AC=1;AN=2;DP4=2,1,4,3;MQ=20	GT:PL	0/1:84,0,28
Ref_Crab_Transcript_33622_327	113	T	A	33.3377	DP=17;VDB=0.545382;SGB=-0.636426;RPB=0.86931;MQB=1;MQSB=1;BQB=0.9986;MQ0F=0;ICB=1;HOB=0.5;AC=1;AN=2;DP4=5,4,5,2;MQ=20	GT:PL	0/1:66,0,93
Ref_Crab_Transcript_33637_308	80	A	C	74	DP=41;VDB=0.0049127;SGB=-0.688148;RPB=0.619992;MQB=0.577654;MQSB=0.960467;BQB=0.155992;MQ0F=0;ICB=1;HOB=0.5;AC=1;AN=2;DP4=11,14,9,6;MQ=20	GT:PL	0/1:107,0,146
Ref_Crab_Transcript_33637_308	113	C	T	45.7134	DP=49;VDB=0.00628137;SGB=-0.688148;RPB=0.0268395;MQB=0.542265;MQSB=0.946485;BQB=0.992908;MQ0F=0;ICB=1;HOB=0.5;AC=1;AN=2;DP4=13,21,9,6;MQ=20	GT:PL	0/1:79,0,150
Ref_Crab_Transcript_33641_332	196	C	A	111	DP=71;VDB=0.182631;SGB=-0.693141;RPB=0.968447;MQB=1;MQSB=1;BQB=0.995225;MQ0F=0;ICB=1;HOB=0.5;AC=1;AN=2;DP4=15,19,17,20;MQ=20	GT:PL	0/1:144,0,138
Ref_Crab_Transcript_33641_332	277	C	G	45.8928	DP=43;VDB=0.0474308;SGB=-0.686358;RPB=0.243463;MQB=1;MQSB=1;BQB=0.918036;MQ0F=0;ICB=1;HOB=0.5;AC=1;AN=2;DP4=10,18,4,10;MQ=20	GT:PL	0/1:79,0,148
Ref_Crab_Transcript_33642_773	326	T	G	56	DP=16;VDB=0.0108899;SGB=-0.676189;RPB=0.878142;MQB=1;MQSB=1;BQB=0.594648;MQ0F=0;ICB=1;HOB=0.5;AC=1;AN=2;DP4=4,1,9,2;MQ=20	GT:PL	0/1:89,0,39
Ref_Crab_Transcript_33645_521	343	T	C	180	DP=29;VDB=0.0145382;SGB=-0.693054;RPB=-;MQB=-;MQSB=1;BQB=-;MQ0F=0;ICB=-;HOB=-;AC=2;AN=2;DP4=0,0,10,18;MQ=20	GT:PL	1/1:207,84,0
Ref_Crab_Transcript_33650_832	520	A	G	76	DP=31;VDB=0.0467012;SGB=-0.686358;RPB=0.939481;MQB=1;MQSB=1;BQB=0.812541;MQ0F=0;ICB=1;HOB=0.5;AC=1;AN=2;DP4=8,8,7,7;MQ=20	GT:PL	0/1:109,0,122
Ref_Crab_Transcript_33666_326	128	A	C	48.385	DP=20;VDB=0.158094;SGB=-0.651104;RPB=0.753577;MQB=1;MQSB=1;BQB=0.785785;MQ0F=0;ICB=1;HOB=0.5;AC=1;AN=2;DP4=4,3,2,6;MQ=20	GT:PL	0/1:81,0,73
Ref_Crab_Transcript_33667_454	234	T	C	39.2281	DP=10;VDB=0.856113;SGB=-0.616816;RPB=0.895781;MQB=1.00775;MQSB=0.952347;BQB=0.335918;MQ0F=0;ICB=1;HOB=0.5;AC=1;AN=2;DP4=3,1,2,4;MQ=20	GT:PL	0/1:72,0,42
Ref_Crab_Transcript_33668_434	183	T	C	58	DP=12;VDB=0.480966;SGB=-0.651104;RPB=0.94394;MQB=1;MQSB=1;BQB=0.543691;MQ0F=0;ICB=1;HOB=0.5;AC=1;AN=2;DP4=1,3,3,5;MQ=20	GT:PL	0/1:91,0,38
Ref_Crab_Transcript_33675_336	211	G	A	66	DP=27;VDB=6.44043e-05;SGB=-0.680642;RPB=6.48874e-05;MQB=1;MQSB=1;BQB=0.958048;MQ0F=0;ICB=1;HOB=0.5;AC=1;AN=2;DP4=7,8,6,6;MQ=20	GT:PL	0/1:99,0,122
Ref_Crab_Transcript_33675_336	216	A	G	91	DP=24;VDB=0.025084;SGB=-0.688148;RPB=0.00616761;MQB=1;MQSB=1;BQB=0.790483;MQ0F=0;ICB=1;HOB=0.5;AC=1;AN=2;DP4=4,5,8,7;MQ=20	GT:PL	0/1:124,0,76
Ref_Crab_Transcript_33675_336	219	G	A	97	DP=25;VDB=0.177766;SGB=-0.690438;RPB=0.0275846;MQB=1;MQSB=1;BQB=0.228397;MQ0F=0;ICB=1;HOB=0.5;AC=1;AN=2;DP4=4,4,8,9;MQ=20	GT:PL	0/1:130,0,61
Ref_Crab_Transcript_33704_1139	879	T	C	61	DP=44;VDB=0.265541;SGB=-0.691153;RPB=0.161482;MQB=1;MQSB=1;BQB=0.925368;MQ0F=0;ICB=1;HOB=0.5;AC=1;AN=2;DP4=13,13,13,5;MQ=20	GT:PL	0/1:94,0,143
Ref_Crab_Transcript_33704_1139	945	C	T	117	DP=13;VDB=5.96656e-06;SGB=-0.676189;RPB=-;MQB=-;MQSB=0.950952;BQB=-;MQ0F=0;ICB=-;HOB=-;AC=2;AN=2;DP4=0,0,6,5;MQ=20	GT:PL	1/1:144,33,0
Ref_Crab_Transcript_33705_316	37	T	A	110	DP=35;VDB=4.37658e-05;SGB=-0.691153;RPB=0.942213;MQB=0.917856;MQSB=0.385821;BQB=0.0664003;MQ0F=0;ICB=1;HOB=0.5;AC=1;AN=2;DP4=10,6,8,10;MQ=22	GT:PL	0/1:143,0,152
Ref_Crab_Transcript_33729_1125	299	A	T	73	DP=1123;VDB=0.822025;SGB=-0.693147;RPB=0.470978;MQB=1;MQSB=1;BQB=0.997818;MQ0F=0;ICB=1;HOB=0.5;AC=1;AN=2;DP4=250,125,495,239;MQ=20	GT:PL	0/1:106,0,33
Ref_Crab_Transcript_33759_486	322	T	C	122	DP=782;VDB=0;SGB=-0.693147;RPB=7.40159e-09;MQB=0.000194563;MQSB=2.88548e-07;BQB=0.000135753;MQ0F=0;ICB=1;HOB=0.5;AC=1;AN=2;DP4=282,178,163,102;MQ=26	GT:PL	0/1:155,0,255
Ref_Crab_Transcript_33772_2748	1604	C	T	75	DP=70;VDB=0.772379;SGB=-0.692976;RPB=0.941764;MQB=1;MQSB=1;BQB=0.593793;MQ0F=0;ICB=1;HOB=0.5;AC=1;AN=2;DP4=10,34,9,17;MQ=20	GT:PL	0/1:108,0,147
Ref_Crab_Transcript_33772_2748	1901	C	T	55	DP=61;VDB=0.0120456;SGB=-0.692067;RPB=0.969015;MQB=1;MQSB=1;BQB=0.996931;MQ0F=0;ICB=1;HOB=0.5;AC=1;AN=2;DP4=24,16,7,13;MQ=20	GT:PL	0/1:88,0,139
Ref_Crab_Transcript_33776_762	250	A	G	37.3873	DP=15;VDB=0.285428;SGB=-0.651104;RPB=0.180092;MQB=1;MQSB=1;BQB=0.68614;MQ0F=0;ICB=1;HOB=0.5;AC=1;AN=2;DP4=5,2,1,7;MQ=20	GT:PL	0/1:70,0,69
Ref_Crab_Transcript_33777_1115	1043	C	T	61	DP=87;VDB=9.27297e-05;SGB=-0.693127;RPB=0.427873;MQB=1;MQSB=1;BQB=0.82632;MQ0F=0;ICB=1;HOB=0.5;AC=1;AN=2;DP4=8,44,5,28;MQ=20	GT:PL	0/1:94,0,137
Ref_Crab_Transcript_33779_445	54	C	T	30.4079	DP=122;VDB=1.59912e-33;SGB=-0.693147;RPB=0.400732;MQB=1;MQSB=1;BQB=0.705345;MQ0F=0;ICB=1;HOB=0.5;AC=1;AN=2;DP4=52,5,54,2;MQ=20	GT:PL	0/1:63,0,83
Ref_Crab_Transcript_33779_445	74	C	G	77	DP=161;VDB=5.45793e-16;SGB=-0.693147;RPB=0.000547231;MQB=1;MQSB=1;BQB=0.00361895;MQ0F=0;ICB=1;HOB=0.5;AC=1;AN=2;DP4=55,7,80,17;MQ=20	GT:PL	0/1:110,0,62
Ref_Crab_Transcript_33779_445	77	A	G	81	DP=171;VDB=5.67779e-16;SGB=-0.693147;RPB=0.00324591;MQB=1;MQSB=1;BQB=0.503878;MQ0F=0;ICB=1;HOB=0.5;AC=1;AN=2;DP4=58,9,79,18;MQ=20	GT:PL	0/1:114,0,75
Ref_Crab_Transcript_33787_1718	1129	T	A	31.2699	DP=17;VDB=0.0227446;SGB=-0.636426;RPB=0.393241;MQB=1;MQSB=1;BQB=0.179237;MQ0F=0;ICB=1;HOB=0.5;AC=1;AN=2;DP4=3,7,5,2;MQ=20	GT:PL	0/1:64,0,98
Ref_Crab_Transcript_33813_404	105	C	T	70	DP=28;VDB=0.952454;SGB=-0.683931;RPB=0.935917;MQB=1;MQSB=1;BQB=0.334449;MQ0F=0;ICB=1;HOB=0.5;AC=1;AN=2;DP4=12,2,8,5;MQ=20	GT:PL	0/1:103,0,84
Ref_Crab_Transcript_33830_547	213	G	T	43.4044	DP=14;VDB=0.47641;SGB=-0.636426;RPB=0.30295;MQB=0.966012;MQSB=1;BQB=0.571605;MQ0F=0;ICB=1;HOB=0.5;AC=1;AN=2;DP4=7,0,4,3;MQ=20	GT:PL	0/1:76,0,53
Ref_Crab_Transcript_33834_472	166	C	T	63	DP=20;VDB=0.567998;SGB=-0.676189;RPB=0.999279;MQB=1;MQSB=1;BQB=0.727471;MQ0F=0;ICB=1;HOB=0.5;AC=1;AN=2;DP4=5,4,7,4;MQ=20	GT:PL	0/1:96,0,84
Ref_Crab_Transcript_33835_359	291	C	G	54	DP=14;VDB=0.589678;SGB=-0.651104;RPB=0.997919;MQB=1;MQSB=1;BQB=0.991701;MQ0F=0;ICB=1;HOB=0.5;AC=1;AN=2;DP4=1,5,3,5;MQ=20	GT:PL	0/1:87,0,57
Ref_Crab_Transcript_33843_992	55	C	G	112	DP=11;VDB=0.00603748;SGB=-0.670168;RPB=-;MQB=-;MQSB=1.00775;BQB=-;MQ0F=0;ICB=-;HOB=-;AC=2;AN=2;DP4=0,0,4,6;MQ=20	GT:PL	1/1:139,30,0
Ref_Crab_Transcript_33843_992	64	T	G	115	DP=12;VDB=0.0145571;SGB=-0.676189;RPB=-;MQB=-;MQSB=0.964642;BQB=-;MQ0F=0;ICB=-;HOB=-;AC=2;AN=2;DP4=0,0,4,7;MQ=20	GT:PL	1/1:142,33,0
Ref_Crab_Transcript_33865_483	468	G	T	64	DP=11;VDB=0.000288618;SGB=-0.662043;RPB=0.333333;MQB=1;MQSB=0.964642;BQB=0;MQ0F=0;ICB=1;HOB=0.5;AC=1;AN=2;DP4=2,0,2,7;MQ=20	GT:PL	0/1:94,0,5
Ref_Crab_Transcript_33957_1212	375	G	A	31.0844	DP=22;VDB=0.0106406;SGB=-0.651104;RPB=0.953929;MQB=1;MQSB=1;BQB=0.810414;MQ0F=0;ICB=1;HOB=0.5;AC=1;AN=2;DP4=2,12,2,6;MQ=20	GT:PL	0/1:64,0,97
Ref_Crab_Transcript_33973_840	794	G	A	217	DP=217;VDB=1.94648e-23;SGB=-0.693147;RPB=0.468944;MQB=1;MQSB=1;BQB=0.21118;MQ0F=0;ICB=-;HOB=-;AC=2;AN=2;DP4=2,0,65,96;MQ=20	GT:PL	1/1:244,255,0
Ref_Crab_Transcript_33973_840	806	G	T	184	DP=178;VDB=2.36438e-36;SGB=-0.693147;RPB=0.905087;MQB=1;MQSB=1;BQB=6.03134e-05;MQ0F=0;ICB=-;HOB=-;AC=2;AN=2;DP4=9,0,36,69;MQ=20	GT:PL	1/1:211,203,0
Ref_Crab_Transcript_33973_840	816	G	T	131	DP=136;VDB=2.69174e-23;SGB=-0.693147;RPB=0.0726581;MQB=1;MQSB=1;BQB=0.0370255;MQ0F=0;ICB=-;HOB=-;AC=2;AN=2;DP4=9,2,36,41;MQ=20	GT:PL	1/1:158,91,0
Ref_Crab_Transcript_33973_840	831	C	A	159	DP=59;VDB=3.01304e-18;SGB=-0.693147;RPB=-;MQB=-;MQSB=1;BQB=-;MQ0F=0;ICB=-;HOB=-;AC=2;AN=2;DP4=0,0,26,21;MQ=20	GT:PL	1/1:186,141,0
Ref_Crab_Transcript_33985_319	150	G	A	113	DP=327;VDB=0.998963;SGB=-0.693147;RPB=0.252534;MQB=1;MQSB=1;BQB=0.152233;MQ0F=0;ICB=1;HOB=0.5;AC=1;AN=2;DP4=85,41,113,71;MQ=20	GT:PL	0/1:146,0,115
Ref_Crab_Transcript_34003_480	350	C	A	58	DP=21;VDB=0.09489;SGB=-0.670168;RPB=0.0923061;MQB=1;MQSB=1;BQB=0.317882;MQ0F=0;ICB=1;HOB=0.5;AC=1;AN=2;DP4=3,8,5,5;MQ=20	GT:PL	0/1:91,0,97
Ref_Crab_Transcript_34004_804	566	C	T	82	DP=22;VDB=0.848275;SGB=-0.683931;RPB=0.763541;MQB=1;MQSB=1;BQB=0.997773;MQ0F=0;ICB=1;HOB=0.5;AC=1;AN=2;DP4=6,3,7,6;MQ=20	GT:PL	0/1:115,0,76
Ref_Crab_Transcript_34010_807	55	T	C	43.3923	DP=20;VDB=0.0326276;SGB=-0.662043;RPB=0.360295;MQB=1;MQSB=1;BQB=0.829029;MQ0F=0;ICB=1;HOB=0.5;AC=1;AN=2;DP4=8,2,7,2;MQ=20	GT:PL	0/1:76,0,82
Ref_Crab_Transcript_34010_807	541	T	G	61	DP=23;VDB=0.168722;SGB=-0.676189;RPB=0.995748;MQB=1;MQSB=1;BQB=0.995748;MQ0F=0;ICB=1;HOB=0.5;AC=1;AN=2;DP4=6,6,7,4;MQ=20	GT:PL	0/1:94,0,107
Ref_Crab_Transcript_34033_885	454	T	C	47.0695	DP=11;VDB=0.874061;SGB=-0.636426;RPB=0.803868;MQB=0.964642;MQSB=0.964642;BQB=0.562708;MQ0F=0;ICB=1;HOB=0.5;AC=1;AN=2;DP4=2,2,2,5;MQ=20	GT:PL	0/1:80,0,42
Ref_Crab_Transcript_34056_795	501	G	A	41.3894	DP=13;VDB=0.573839;SGB=-0.636426;RPB=0.828239;MQB=0.961166;MQSB=0.961166;BQB=0.695312;MQ0F=0;ICB=1;HOB=0.5;AC=1;AN=2;DP4=2,4,4,3;MQ=20	GT:PL	0/1:74,0,65
Ref_Crab_Transcript_34162_333	89	C	T	39.1934	DP=10;VDB=0.0243922;SGB=-0.616816;RPB=0.0559863;MQB=1.00775;MQSB=1.00775;BQB=0.503877;MQ0F=0;ICB=1;HOB=0.5;AC=1;AN=2;DP4=2,2,2,4;MQ=20	GT:PL	0/1:72,0,42
Ref_Crab_Transcript_34162_333	99	C	T	38.3687	DP=12;VDB=0.859996;SGB=-0.616816;RPB=0.0594345;MQB=0.950952;MQSB=0.950952;BQB=0.0891517;MQ0F=0;ICB=1;HOB=0.5;AC=1;AN=2;DP4=2,3,3,3;MQ=20	GT:PL	0/1:71,0,57
Ref_Crab_Transcript_34162_333	132	T	C	137	DP=29;VDB=0.00015827;SGB=-0.692976;RPB=0.0920654;MQB=1;MQSB=1;BQB=0.561624;MQ0F=0;ICB=-;HOB=-;AC=2;AN=2;DP4=2,1,13,13;MQ=20	GT:PL	1/1:164,28,0
Ref_Crab_Transcript_34162_333	133	T	C	79	DP=29;VDB=0.0452691;SGB=-0.686358;RPB=0.590992;MQB=1;MQSB=1;BQB=0.807118;MQ0F=0;ICB=1;HOB=0.5;AC=1;AN=2;DP4=9,6,6,8;MQ=20	GT:PL	0/1:112,0,114
Ref_Crab_Transcript_34162_333	176	C	T	81	DP=32;VDB=0.00604398;SGB=-0.689466;RPB=0.565791;MQB=1;MQSB=1;BQB=0.153235;MQ0F=0;ICB=1;HOB=0.5;AC=1;AN=2;DP4=7,8,10,6;MQ=20	GT:PL	0/1:114,0,115
Ref_Crab_Transcript_34162_333	201	C	T	84	DP=24;VDB=5.19646e-05;SGB=-0.688148;RPB=0.699238;MQB=1;MQSB=1;BQB=0.447102;MQ0F=0;ICB=1;HOB=0.5;AC=1;AN=2;DP4=2,5,10,5;MQ=20	GT:PL	0/1:117,0,54
Ref_Crab_Transcript_34162_333	222	G	A	52	DP=10;VDB=0.01209;SGB=-0.590765;RPB=-;MQB=-;MQSB=1;BQB=-;MQ0F=0;ICB=-;HOB=-;AC=2;AN=2;DP4=0,0,4,1;MQ=20	GT:PL	1/1:79,15,0
Ref_Crab_Transcript_34163_1316	406	T	C	52	DP=18;VDB=0.530978;SGB=-0.662043;RPB=0.975928;MQB=1;MQSB=1;BQB=0.0647115;MQ0F=0;ICB=1;HOB=0.5;AC=1;AN=2;DP4=5,4,6,3;MQ=20	GT:PL	0/1:85,0,89
Ref_Crab_Transcript_34194_522	167	C	T	70	DP=16;VDB=0.211686;SGB=-0.670168;RPB=0.243355;MQB=1;MQSB=1;BQB=0.986852;MQ0F=0;ICB=1;HOB=0.5;AC=1;AN=2;DP4=3,3,4,6;MQ=20	GT:PL	0/1:103,0,58
Ref_Crab_Transcript_34238_414	214	T	G	103	DP=44;VDB=0.418572;SGB=-0.692914;RPB=0.996791;MQB=1;MQSB=1;BQB=0.0649346;MQ0F=0;ICB=1;HOB=0.5;AC=1;AN=2;DP4=7,9,14,11;MQ=20	GT:PL	0/1:136,0,102
Ref_Crab_Transcript_34242_1154	412	C	T	66	DP=12;VDB=0.447301;SGB=-0.662043;RPB=0.707404;MQB=1;MQSB=0.982603;BQB=0.707404;MQ0F=0;ICB=1;HOB=0.5;AC=1;AN=2;DP4=1,2,5,4;MQ=20	GT:PL	0/1:100,0,22
Ref_Crab_Transcript_34242_1154	502	G	T	46.6838	DP=10;VDB=0.293704;SGB=-0.636426;RPB=0.824834;MQB=0.916482;MQSB=1.00775;BQB=0.916482;MQ0F=0;ICB=1;HOB=0.5;AC=1;AN=2;DP4=2,1,2,5;MQ=20	GT:PL	0/1:80,0,28
Ref_Crab_Transcript_34259_1712	296	G	A	37.6927	DP=117;VDB=0.0233;SGB=-0.693139;RPB=0.807751;MQB=1;MQSB=1;BQB=0.999128;MQ0F=0;ICB=1;HOB=0.5;AC=1;AN=2;DP4=49,31,18,18;MQ=20	GT:PL	0/1:71,0,120
Ref_Crab_Transcript_34263_585	216	C	T	88	DP=47;VDB=0.110477;SGB=-0.692717;RPB=0.90496;MQB=1;MQSB=1;BQB=0.793038;MQ0F=0;ICB=1;HOB=0.5;AC=1;AN=2;DP4=12,12,15,8;MQ=20	GT:PL	0/1:121,0,135
Ref_Crab_Transcript_34263_585	231	C	T	96	DP=50;VDB=0.124686;SGB=-0.692831;RPB=0.964711;MQB=1;MQSB=1;BQB=0.943767;MQ0F=0;ICB=1;HOB=0.5;AC=1;AN=2;DP4=12,12,14,10;MQ=20	GT:PL	0/1:129,0,134
Ref_Crab_Transcript_34263_585	240	C	T	109	DP=49;VDB=0.631563;SGB=-0.692976;RPB=0.87477;MQB=1;MQSB=1;BQB=0.579299;MQ0F=0;ICB=1;HOB=0.5;AC=1;AN=2;DP4=11,11,11,15;MQ=20	GT:PL	0/1:142,0,125
Ref_Crab_Transcript_34266_546	13	C	T	30.8371	DP=41;VDB=2.22766e-05;SGB=-0.662043;RPB=0.102478;MQB=1;MQSB=1;BQB=0.000234016;MQ0F=0;ICB=1;HOB=0.5;AC=1;AN=2;DP4=3,15,4,5;MQ=20	GT:PL	0/1:64,0,113
Ref_Crab_Transcript_34271_341	292	A	G	72	DP=30;VDB=0.000300311;SGB=-0.683931;RPB=0.4224;MQB=1;MQSB=1;BQB=0.762145;MQ0F=0;ICB=1;HOB=0.5;AC=1;AN=2;DP4=6,9,5,8;MQ=20	GT:PL	0/1:105,0,120
Ref_Crab_Transcript_34271_341	318	G	T	89	DP=11;VDB=0.000408389;SGB=-0.651104;RPB=-;MQB=-;MQSB=1;BQB=-;MQ0F=0;ICB=-;HOB=-;AC=2;AN=2;DP4=0,0,2,6;MQ=20	GT:PL	1/1:116,24,0
Ref_Crab_Transcript_34273_514	3	T	A	69	DP=16;VDB=9.87747e-07;SGB=-0.670168;RPB=-;MQB=-;MQSB=1.00775;BQB=-;MQ0F=0;ICB=-;HOB=-;AC=2;AN=2;DP4=0,0,6,4;MQ=20	GT:PL	1/1:104,32,8
Ref_Crab_Transcript_34274_828	351	A	G	43.0872	DP=11;VDB=0.35322;SGB=-0.636426;RPB=0.562708;MQB=0.964642;MQSB=1;BQB=0.200967;MQ0F=0;ICB=1;HOB=0.5;AC=1;AN=2;DP4=3,1,5,2;MQ=20	GT:PL	0/1:76,0,39
Ref_Crab_Transcript_34278_517	358	C	T	36.2677	DP=17;VDB=0.743816;SGB=-0.636426;RPB=0.887766;MQB=1;MQSB=1;BQB=0.650664;MQ0F=0;ICB=1;HOB=0.5;AC=1;AN=2;DP4=5,5,3,4;MQ=20	GT:PL	0/1:69,0,102
Ref_Crab_Transcript_34280_1060	453	A	C	196	DP=247;VDB=0.00653822;SGB=-0.693147;RPB=0.259506;MQB=1;MQSB=1;BQB=0.433794;MQ0F=0;ICB=-;HOB=-;AC=2;AN=2;DP4=7,7,103,121;MQ=20	GT:PL	1/1:223,255,0
Ref_Crab_Transcript_34289_755	246	G	A	82	DP=51;VDB=0.153061;SGB=-0.692914;RPB=0.244528;MQB=1;MQSB=1;BQB=0.734362;MQ0F=0;ICB=1;HOB=0.5;AC=1;AN=2;DP4=17,8,18,7;MQ=20	GT:PL	0/1:115,0,120
Ref_Crab_Transcript_34289_755	312	T	C	89	DP=61;VDB=0.0756391;SGB=-0.692914;RPB=0.964612;MQB=1;MQSB=1;BQB=0.753919;MQ0F=0;ICB=1;HOB=0.5;AC=1;AN=2;DP4=15,19,9,16;MQ=20	GT:PL	0/1:122,0,146
Ref_Crab_Transcript_34301_468	88	C	T	37.6782	DP=43;VDB=0.747745;SGB=-0.683931;RPB=0.881418;MQB=1;MQSB=1;BQB=0.796634;MQ0F=0;ICB=1;HOB=0.5;AC=1;AN=2;DP4=16,14,7,6;MQ=20	GT:PL	0/1:71,0,144
Ref_Crab_Transcript_34301_468	94	T	A	51	DP=42;VDB=0.669416;SGB=-0.686358;RPB=0.759185;MQB=1;MQSB=1;BQB=0.978966;MQ0F=0;ICB=1;HOB=0.5;AC=1;AN=2;DP4=15,12,8,6;MQ=20	GT:PL	0/1:84,0,143
Ref_Crab_Transcript_34301_468	253	C	T	61	DP=62;VDB=0.404131;SGB=-0.692352;RPB=0.559839;MQB=1;MQSB=1;BQB=0.99952;MQ0F=0;ICB=1;HOB=0.5;AC=1;AN=2;DP4=17,22,12,9;MQ=20	GT:PL	0/1:94,0,150
Ref_Crab_Transcript_34301_468	290	G	A	80	DP=62;VDB=0.604831;SGB=-0.692831;RPB=0.695297;MQB=1;MQSB=1;BQB=0.0928214;MQ0F=0;ICB=1;HOB=0.5;AC=1;AN=2;DP4=14,22,12,12;MQ=20	GT:PL	0/1:113,0,151
Ref_Crab_Transcript_34301_468	298	C	T	38.7095	DP=66;VDB=0.945799;SGB=-0.692067;RPB=0.96602;MQB=1;MQSB=1;BQB=0.969539;MQ0F=0;ICB=1;HOB=0.5;AC=1;AN=2;DP4=18,27,13,7;MQ=20	GT:PL	0/1:72,0,148
Ref_Crab_Transcript_34301_468	328	T	C	67	DP=48;VDB=0.000614632;SGB=-0.691153;RPB=0.361348;MQB=1;MQSB=1;BQB=0.509907;MQ0F=0;ICB=1;HOB=0.5;AC=1;AN=2;DP4=13,17,10,8;MQ=20	GT:PL	0/1:100,0,149
Ref_Crab_Transcript_34308_364	243	G	A	70	DP=17;VDB=0.0444992;SGB=-0.670168;RPB=0.809155;MQB=1;MQSB=1;BQB=0.315707;MQ0F=0;ICB=1;HOB=0.5;AC=1;AN=2;DP4=3,3,4,6;MQ=20	GT:PL	0/1:103,0,58
Ref_Crab_Transcript_34308_364	250	T	C	64	DP=18;VDB=0.229649;SGB=-0.670168;RPB=0.824135;MQB=1;MQSB=1;BQB=0.824135;MQ0F=0;ICB=1;HOB=0.5;AC=1;AN=2;DP4=3,5,5,5;MQ=20	GT:PL	0/1:97,0,78
Ref_Crab_Transcript_34310_1169	772	G	A	86	DP=131;VDB=0.698111;SGB=-0.693147;RPB=0.18835;MQB=1;MQSB=1;BQB=0.603427;MQ0F=0;ICB=1;HOB=0.5;AC=1;AN=2;DP4=39,39,20,32;MQ=20	GT:PL	0/1:119,0,143
Ref_Crab_Transcript_34312_1121	631	C	A	109	DP=36;VDB=0.610132;SGB=-0.692562;RPB=0.251613;MQB=1;MQSB=1;BQB=0.378515;MQ0F=0;ICB=1;HOB=0.5;AC=1;AN=2;DP4=7,4,11,11;MQ=20	GT:PL	0/1:142,0,72
Ref_Crab_Transcript_34320_654	384	T	A	44.4044	DP=14;VDB=0.173752;SGB=-0.636426;RPB=0.777382;MQB=0.966012;MQSB=1;BQB=0.714506;MQ0F=0;ICB=1;HOB=0.5;AC=1;AN=2;DP4=3,4,3,4;MQ=20	GT:PL	0/1:77,0,77
Ref_Crab_Transcript_34352_967	808	T	G	71	DP=41;VDB=0.148734;SGB=-0.689466;RPB=0.668623;MQB=1;MQSB=1;BQB=0.0747321;MQ0F=0;ICB=1;HOB=0.5;AC=1;AN=2;DP4=15,9,8,8;MQ=20	GT:PL	0/1:104,0,133
Ref_Crab_Transcript_34361_664	369	A	C	96	DP=11;VDB=0.651954;SGB=-0.662043;RPB=-;MQB=-;MQSB=0.924584;BQB=-;MQ0F=0;ICB=-;HOB=-;AC=2;AN=2;DP4=0,0,6,3;MQ=20	GT:PL	1/1:123,27,0
Ref_Crab_Transcript_34362_521	90	C	T	67	DP=19;VDB=0.379326;SGB=-0.670168;RPB=0.240508;MQB=1;MQSB=1;BQB=0.113049;MQ0F=0;ICB=1;HOB=0.5;AC=1;AN=2;DP4=3,5,5,5;MQ=20	GT:PL	0/1:100,0,78
Ref_Crab_Transcript_34363_917	52	T	C	54	DP=13;VDB=0.000408389;SGB=-0.651104;RPB=0.0249144;MQB=1;MQSB=0.95494;BQB=0.174611;MQ0F=0;ICB=1;HOB=0.5;AC=1;AN=2;DP4=3,1,2,6;MQ=20	GT:PL	0/1:87,0,37
Ref_Crab_Transcript_34363_917	54	T	A	56	DP=13;VDB=0.000203906;SGB=-0.662043;RPB=0.0211283;MQB=1;MQSB=1;BQB=0.207131;MQ0F=0;ICB=1;HOB=0.5;AC=1;AN=2;DP4=3,1,2,7;MQ=20	GT:PL	0/1:89,0,34
Ref_Crab_Transcript_34363_917	63	C	T	58	DP=14;VDB=0.000203906;SGB=-0.662043;RPB=0.0211283;MQB=1;MQSB=1;BQB=0.039122;MQ0F=0;ICB=1;HOB=0.5;AC=1;AN=2;DP4=3,1,2,7;MQ=20	GT:PL	0/1:91,0,34
Ref_Crab_Transcript_34363_917	64	A	C	58	DP=15;VDB=0.000203906;SGB=-0.662043;RPB=0.0211283;MQB=1;MQSB=1;BQB=0.0474718;MQ0F=0;ICB=1;HOB=0.5;AC=1;AN=2;DP4=3,1,2,7;MQ=20	GT:PL	0/1:91,0,34
Ref_Crab_Transcript_34363_917	66	G	T	58	DP=15;VDB=0.000203906;SGB=-0.662043;RPB=0.0211283;MQB=1;MQSB=1;BQB=0.0211283;MQ0F=0;ICB=1;HOB=0.5;AC=1;AN=2;DP4=3,1,2,7;MQ=20	GT:PL	0/1:91,0,34
Ref_Crab_Transcript_34373_2515	564	G	A	42.2821	DP=13;VDB=0.669559;SGB=-0.636426;RPB=0.95494;MQB=0.95494;MQSB=1;BQB=0.760054;MQ0F=0;ICB=1;HOB=0.5;AC=1;AN=2;DP4=3,2,5,2;MQ=20	GT:PL	0/1:75,0,54
Ref_Crab_Transcript_34373_2515	1359	G	A	57	DP=55;VDB=0.974739;SGB=-0.69168;RPB=0.95574;MQB=1;MQSB=1;BQB=0.982879;MQ0F=0;ICB=1;HOB=0.5;AC=1;AN=2;DP4=15,21,6,13;MQ=20	GT:PL	0/1:90,0,151
Ref_Crab_Transcript_34373_2515	1860	C	A	41.1242	DP=24;VDB=0.687358;SGB=-0.662043;RPB=0.971956;MQB=1;MQSB=1;BQB=0.422974;MQ0F=0;ICB=1;HOB=0.5;AC=1;AN=2;DP4=7,8,3,6;MQ=20	GT:PL	0/1:74,0,126
Ref_Crab_Transcript_34406_1125	3	G	A	40.3587	DP=13;VDB=1.17174e-06;SGB=-0.670168;RPB=1;MQB=1;MQSB=1;BQB=1;MQ0F=0;ICB=-;HOB=-;AC=2;AN=2;DP4=1,0,9,1;MQ=20	GT:PL	1/1:89,27,22
Ref_Crab_Transcript_34409_393	189	A	G	68	DP=12;VDB=0.870506;SGB=-0.662043;RPB=0.811069;MQB=1;MQSB=0.982603;BQB=0.760709;MQ0F=0;ICB=1;HOB=0.5;AC=1;AN=2;DP4=2,1,4,5;MQ=20	GT:PL	0/1:102,0,22
Ref_Crab_Transcript_34409_393	320	G	A	55	DP=14;VDB=0.14548;SGB=-0.651104;RPB=0.195278;MQB=1;MQSB=1;BQB=0.902954;MQ0F=0;ICB=1;HOB=0.5;AC=1;AN=2;DP4=4,2,4,4;MQ=20	GT:PL	0/1:88,0,61
Ref_Crab_Transcript_34409_393	337	A	G	60	DP=11;VDB=0.060425;SGB=-0.651104;RPB=0.594025;MQB=1;MQSB=0.950952;BQB=0.360295;MQ0F=0;ICB=1;HOB=0.5;AC=1;AN=2;DP4=2,1,4,4;MQ=20	GT:PL	0/1:94,0,25
Ref_Crab_Transcript_34413_1060	241	A	T	53	DP=10;VDB=0.838194;SGB=-0.636426;RPB=0.857143;MQB=1;MQSB=0.974597;BQB=0.571429;MQ0F=0;ICB=1;HOB=0.5;AC=1;AN=2;DP4=0,2,4,3;MQ=20	GT:PL	0/1:86,0,11
Ref_Crab_Transcript_34413_1060	506	G	A	102	DP=10;VDB=0.101769;SGB=-0.662043;RPB=-;MQB=-;MQSB=0.924584;BQB=-;MQ0F=0;ICB=-;HOB=-;AC=2;AN=2;DP4=0,0,3,6;MQ=20	GT:PL	1/1:129,27,0
Ref_Crab_Transcript_34421_304	221	A	G	181	DP=31;VDB=0.203683;SGB=-0.693097;RPB=-;MQB=-;MQSB=1;BQB=-;MQ0F=0;ICB=-;HOB=-;AC=2;AN=2;DP4=0,0,9,21;MQ=20	GT:PL	1/1:208,90,0
Ref_Crab_Transcript_34431_806	372	A	G	34.1858	DP=18;VDB=0.656385;SGB=-0.636426;RPB=0.608815;MQB=1;MQSB=1;BQB=0.349974;MQ0F=0;ICB=1;HOB=0.5;AC=1;AN=2;DP4=5,6,3,4;MQ=20	GT:PL	0/1:67,0,109
Ref_Crab_Transcript_34436_950	600	C	T	70	DP=15;VDB=0.551647;SGB=-0.670168;RPB=0.985816;MQB=1;MQSB=0.961166;BQB=0.597928;MQ0F=0;ICB=1;HOB=0.5;AC=1;AN=2;DP4=1,2,6,4;MQ=20	GT:PL	0/1:104,0,19
Ref_Crab_Transcript_34438_473	44	T	C	86	DP=331;VDB=3.09437e-20;SGB=-0.693147;RPB=0.968449;MQB=1;MQSB=1;BQB=0.00702788;MQ0F=0;ICB=1;HOB=0.5;AC=1;AN=2;DP4=47,56,97,113;MQ=20	GT:PL	0/1:119,0,37
Ref_Crab_Transcript_34438_473	215	C	A	83	DP=518;VDB=0.18754;SGB=-0.693147;RPB=0.753585;MQB=1;MQSB=1;BQB=0.990127;MQ0F=0;ICB=1;HOB=0.5;AC=1;AN=2;DP4=160,143,110,98;MQ=20	GT:PL	0/1:116,0,149
Ref_Crab_Transcript_34438_473	218	A	T	67	DP=517;VDB=0.082861;SGB=-0.693147;RPB=0.49334;MQB=1;MQSB=1;BQB=0.981032;MQ0F=0;ICB=1;HOB=0.5;AC=1;AN=2;DP4=158,141,103,98;MQ=20	GT:PL	0/1:100,0,146
Ref_Crab_Transcript_34446_2113	1711	T	G	156	DP=204;VDB=3.23754e-28;SGB=-0.693147;RPB=0.57812;MQB=0.135606;MQSB=0.917348;BQB=0.763354;MQ0F=0;ICB=-;HOB=-;AC=2;AN=2;DP4=3,14,55,118;MQ=20	GT:PL	1/1:183,255,0
Ref_Crab_Transcript_34446_2113	1735	G	A	151	DP=48;VDB=2.98162e-20;SGB=-0.693146;RPB=0.016293;MQB=0.016293;MQSB=0.893014;BQB=0.016293;MQ0F=0;ICB=-;HOB=-;AC=2;AN=2;DP4=0,3,13,30;MQ=20	GT:PL	1/1:178,78,0
Ref_Crab_Transcript_34446_2113	1747	G	C	149	DP=29;VDB=7.70554e-10;SGB=-0.69168;RPB=-;MQB=-;MQSB=1;BQB=-;MQ0F=0;ICB=-;HOB=-;AC=2;AN=2;DP4=0,0,11,8;MQ=20	GT:PL	1/1:176,57,0
Ref_Crab_Transcript_34447_497	4	G	T	48.3931	DP=104;VDB=0;SGB=-0.693147;RPB=0.254433;MQB=1;MQSB=1;BQB=0.943094;MQ0F=0;ICB=1;HOB=0.5;AC=1;AN=2;DP4=9,6,48,15;MQ=20	GT:PL	0/1:81,0,70
Ref_Crab_Transcript_34473_818	197	C	A	65	DP=12;VDB=0.123091;SGB=-0.676189;RPB=1;MQB=1;MQSB=0.982603;BQB=1;MQ0F=0;ICB=-;HOB=-;AC=2;AN=2;DP4=1,0,5,6;MQ=20	GT:PL	1/1:116,32,24
Ref_Crab_Transcript_34473_818	204	T	C	105	DP=13;VDB=0.350982;SGB=-0.680642;RPB=1;MQB=1;MQSB=0.961166;BQB=1;MQ0F=0;ICB=-;HOB=-;AC=2;AN=2;DP4=1,0,5,7;MQ=20	GT:PL	1/1:132,19,0
Ref_Crab_Transcript_34490_1247	694	G	A	51	DP=80;VDB=0.07488;SGB=-0.693021;RPB=0.948374;MQB=1;MQSB=1;BQB=0.623692;MQ0F=0;ICB=1;HOB=0.5;AC=1;AN=2;DP4=6,47,6,21;MQ=20	GT:PL	0/1:84,0,125
Ref_Crab_Transcript_34491_312	26	A	T	49.3359	DP=17;VDB=0.00108593;SGB=-0.662043;RPB=0.635221;MQB=1;MQSB=1;BQB=0.994413;MQ0F=0;ICB=1;HOB=0.5;AC=1;AN=2;DP4=5,2,7,2;MQ=20	GT:PL	0/1:82,0,66
Ref_Crab_Transcript_34491_312	38	T	C	65	DP=19;VDB=0.000111857;SGB=-0.680642;RPB=0.257165;MQB=1;MQSB=1;BQB=0.748798;MQ0F=0;ICB=1;HOB=0.5;AC=1;AN=2;DP4=5,2,9,3;MQ=20	GT:PL	0/1:98,0,59
[truncated: 57,241 more rows]

## Sheet: UMT_M_SNP_Calling
##INFO=<ID=DP,Number=1,Type=Integer,Description="Raw read depth">
##INFO=<ID=VDB,Number=1,Type=Float,Description="Variant Distance Bias for filtering splice-site artefacts in RNA-seq data (bigger is better)",Version="3">
##INFO=<ID=RPB,Number=1,Type=Float,Description="Mann-Whitney U test of Read Position Bias (bigger is better)">
##INFO=<ID=MQB,Number=1,Type=Float,Description="Mann-Whitney U test of Mapping Quality Bias (bigger is better)">
##INFO=<ID=BQB,Number=1,Type=Float,Description="Mann-Whitney U test of Base Quality Bias (bigger is better)">
##INFO=<ID=MQSB,Number=1,Type=Float,Description="Mann-Whitney U test of Mapping Quality vs Strand Bias (bigger is better)">
##INFO=<ID=SGB,Number=1,Type=Float,Description="Segregation based metric.">
##INFO=<ID=MQ0F,Number=1,Type=Float,Description="Fraction of MQ0 reads (smaller is better)">
##FORMAT=<ID=PL,Number=G,Type=Integer,Description="List of Phred-scaled genotype likelihoods">
##FORMAT=<ID=GT,Number=1,Type=String,Description="Genotype">
##INFO=<ID=ICB,Number=1,Type=Float,Description="Inbreeding Coefficient Binomial test (bigger is better)">
##INFO=<ID=HOB,Number=1,Type=Float,Description="Bias in the number of HOMs number (smaller is better)">
##INFO=<ID=AC,Number=A,Type=Integer,Description="Allele count in genotypes for each ALT allele, in the same order as listed">
##INFO=<ID=AN,Number=1,Type=Integer,Description="Total number of alleles in called genotypes">
##INFO=<ID=DP4,Number=4,Type=Integer,Description="Number of high-quality ref-forward , ref-reverse, alt-forward and alt-reverse bases">
##INFO=<ID=MQ,Number=1,Type=Integer,Description="Average mapping quality">
#CHROM	POS	REF	ALT	QUAL	INFO	FORMAT
Ref_Crab_Transcript_64_318	167	T	C	31.3712	DP=11;VDB=0.377852;SGB=-0.616816;RPB=0.0891517;MQB=0.950952;MQSB=1;BQB=0.564628;MQ0F=0;ICB=1;HOB=0.5;AC=1;AN=2;DP4=1,4,1,5;MQ=20	GT:PL	0/1:64,0,53
Ref_Crab_Transcript_106_484	384	G	A	33.3165	DP=21;VDB=0.320998;SGB=-0.662043;RPB=0.364182;MQB=1;MQSB=1;BQB=0.977529;MQ0F=0;ICB=1;HOB=0.5;AC=1;AN=2;DP4=0,12,1,8;MQ=20	GT:PL	0/1:66,0,63
Ref_Crab_Transcript_132_1171	1062	A	G	97	DP=69;VDB=0.546481;SGB=-0.69311;RPB=0.57182;MQB=1;MQSB=1;BQB=0.0734353;MQ0F=0;ICB=1;HOB=0.5;AC=1;AN=2;DP4=12,22,8,23;MQ=20	GT:PL	0/1:130,0,143
Ref_Crab_Transcript_146_648	351	T	A	67	DP=49;VDB=0.727965;SGB=-0.691153;RPB=0.790076;MQB=1;MQSB=1;BQB=0.964183;MQ0F=0;ICB=1;HOB=0.5;AC=1;AN=2;DP4=14,14,9,9;MQ=20	GT:PL	0/1:100,0,144
Ref_Crab_Transcript_154_572	275	A	G	43.4044	DP=14;VDB=0.250641;SGB=-0.636426;RPB=0.428703;MQB=0.966012;MQSB=1;BQB=0.777382;MQ0F=0;ICB=1;HOB=0.5;AC=1;AN=2;DP4=6,1,4,3;MQ=20	GT:PL	0/1:76,0,63
Ref_Crab_Transcript_163_795	25	G	C	115	DP=13;VDB=0.000103292;SGB=-0.680642;RPB=-;MQB=-;MQSB=1;BQB=-;MQ0F=0;ICB=-;HOB=-;AC=2;AN=2;DP4=0,0,8,4;MQ=20	GT:PL	1/1:142,36,0
Ref_Crab_Transcript_165_615	2	A	C	36.1287	DP=34;VDB=2.74636e-08;SGB=-0.686358;RPB=0.562801;MQB=1;MQSB=1;BQB=0.959189;MQ0F=0;ICB=1;HOB=0.5;AC=1;AN=2;DP4=3,3,12,2;MQ=20	GT:PL	0/1:69,0,53
Ref_Crab_Transcript_175_1845	76	A	G	86	DP=19;VDB=0.350819;SGB=-0.683931;RPB=0.863325;MQB=1;MQSB=1;BQB=0.957217;MQ0F=0;ICB=1;HOB=0.5;AC=1;AN=2;DP4=3,2,7,6;MQ=20	GT:PL	0/1:120,0,37
Ref_Crab_Transcript_221_395	211	G	A	32.4595	DP=61;VDB=0.385941;SGB=-0.690438;RPB=0.613033;MQB=1;MQSB=1;BQB=0.450564;MQ0F=0;ICB=1;HOB=0.5;AC=1;AN=2;DP4=16,28,7,10;MQ=20	GT:PL	0/1:66,0,147
Ref_Crab_Transcript_291_441	77	G	A	35.4053	DP=12;VDB=0.0389458;SGB=-0.616816;RPB=0.47436;MQB=0.982603;MQSB=1;BQB=0.71154;MQ0F=0;ICB=1;HOB=0.5;AC=1;AN=2;DP4=2,4,2,4;MQ=20	GT:PL	0/1:68,0,68
Ref_Crab_Transcript_292_412	95	G	A	73	DP=11;VDB=0.447302;SGB=-0.662043;RPB=0.777778;MQB=1;MQSB=0.964642;BQB=0.666667;MQ0F=0;ICB=1;HOB=0.5;AC=1;AN=2;DP4=0,2,4,5;MQ=20	GT:PL	0/1:103,0,5
Ref_Crab_Transcript_297_938	358	G	A	40.6281	DP=82;VDB=0.134356;SGB=-0.692562;RPB=0.833695;MQB=1;MQSB=1;BQB=0.830712;MQ0F=0;ICB=1;HOB=0.5;AC=1;AN=2;DP4=25,27,12,10;MQ=20	GT:PL	0/1:74,0,139
Ref_Crab_Transcript_297_938	360	A	G	105	DP=83;VDB=0.385863;SGB=-0.693147;RPB=0.930638;MQB=1;MQSB=1;BQB=0.420883;MQ0F=0;ICB=1;HOB=0.5;AC=1;AN=2;DP4=13,10,26,26;MQ=20	GT:PL	0/1:138,0,79
Ref_Crab_Transcript_340_930	789	G	A	87	DP=71;VDB=0.498502;SGB=-0.693079;RPB=0.943905;MQB=1;MQSB=1;BQB=0.764281;MQ0F=0;ICB=1;HOB=0.5;AC=1;AN=2;DP4=13,28,12,17;MQ=20	GT:PL	0/1:120,0,151
Ref_Crab_Transcript_387_429	150	C	A	58	DP=36;VDB=0.00999995;SGB=-0.688148;RPB=0.745359;MQB=1;MQSB=1;BQB=0.960656;MQ0F=0;ICB=1;HOB=0.5;AC=1;AN=2;DP4=13,7,11,4;MQ=20	GT:PL	0/1:91,0,124
Ref_Crab_Transcript_401_1434	478	T	C	89	DP=124;VDB=0.736237;SGB=-0.693147;RPB=0.841119;MQB=1;MQSB=1;BQB=0.893858;MQ0F=0;ICB=1;HOB=0.5;AC=1;AN=2;DP4=36,36,21,29;MQ=20	GT:PL	0/1:122,0,142
Ref_Crab_Transcript_556_515	252	T	G	33.3803	DP=13;VDB=0.329692;SGB=-0.616816;RPB=0.920266;MQB=0.961166;MQSB=1;BQB=0.961166;MQ0F=0;ICB=1;HOB=0.5;AC=1;AN=2;DP4=5,2,3,3;MQ=20	GT:PL	0/1:66,0,73
Ref_Crab_Transcript_601_352	227	A	T	49.7754	DP=11;VDB=0.687651;SGB=-0.636426;RPB=0.714286;MQB=1;MQSB=0.974597;BQB=0.714286;MQ0F=0;ICB=1;HOB=0.5;AC=1;AN=2;DP4=1,1,4,3;MQ=20	GT:PL	0/1:83,0,13
Ref_Crab_Transcript_601_352	235	A	T	36.2565	DP=11;VDB=0.902575;SGB=-0.616816;RPB=1.00775;MQB=1.00775;MQSB=1.00775;BQB=0.895781;MQ0F=0;ICB=1;HOB=0.5;AC=1;AN=2;DP4=2,2,2,4;MQ=20	GT:PL	0/1:69,0,45
Ref_Crab_Transcript_672_370	113	T	C	130	DP=15;VDB=0.460588;SGB=-0.683931;RPB=-;MQB=-;MQSB=0.961166;BQB=-;MQ0F=0;ICB=-;HOB=-;AC=2;AN=2;DP4=0,0,7,6;MQ=20	GT:PL	1/1:157,39,0
Ref_Crab_Transcript_675_1421	195	T	C	81	DP=91;VDB=0.056005;SGB=-0.693145;RPB=0.989376;MQB=1;MQSB=1;BQB=0.999967;MQ0F=0;ICB=1;HOB=0.5;AC=1;AN=2;DP4=35,15,28,12;MQ=20	GT:PL	0/1:114,0,128
Ref_Crab_Transcript_777_428	62	A	G	102	DP=10;VDB=0.0169122;SGB=-0.662043;RPB=-;MQB=-;MQSB=0.974597;BQB=-;MQ0F=0;ICB=-;HOB=-;AC=2;AN=2;DP4=0,0,5,4;MQ=20	GT:PL	1/1:129,27,0
Ref_Crab_Transcript_826_684	126	C	A	31.2886	DP=18;VDB=0.695272;SGB=-0.636426;RPB=0.981133;MQB=1;MQSB=1;BQB=1;MQ0F=0;ICB=1;HOB=0.5;AC=1;AN=2;DP4=6,4,5,2;MQ=20	GT:PL	0/1:64,0,95
Ref_Crab_Transcript_831_1219	195	G	A	33.1862	DP=18;VDB=0.661679;SGB=-0.636426;RPB=0.500025;MQB=1;MQSB=1;BQB=0.447612;MQ0F=0;ICB=1;HOB=0.5;AC=1;AN=2;DP4=5,6,4,3;MQ=20	GT:PL	0/1:66,0,109
Ref_Crab_Transcript_882_668	402	C	T	32.7227	DP=10;VDB=0.539429;SGB=-0.590765;RPB=0.9;MQB=1;MQSB=1.01283;BQB=0;MQ0F=0;ICB=1;HOB=0.5;AC=1;AN=2;DP4=1,1,3,2;MQ=20	GT:PL	0/1:66,0,19
Ref_Crab_Transcript_984_762	536	C	T	67	DP=77;VDB=0.315117;SGB=-0.692976;RPB=0.809014;MQB=1;MQSB=1;BQB=0.96375;MQ0F=0;ICB=1;HOB=0.5;AC=1;AN=2;DP4=22,26,13,13;MQ=20	GT:PL	0/1:100,0,144
Ref_Crab_Transcript_1136_564	313	A	G	97	DP=13;VDB=0.907553;SGB=-0.676189;RPB=1;MQB=1;MQSB=1;BQB=1;MQ0F=0;ICB=-;HOB=-;AC=2;AN=2;DP4=0,1,4,7;MQ=20	GT:PL	1/1:124,16,0
Ref_Crab_Transcript_1136_564	314	G	T	77	DP=13;VDB=0.89913;SGB=-0.670168;RPB=1;MQB=1;MQSB=1;BQB=1;MQ0F=0;ICB=-;HOB=-;AC=2;AN=2;DP4=0,1,3,7;MQ=20	GT:PL	1/1:104,10,0
Ref_Crab_Transcript_1318_519	68	C	A	41.3828	DP=16;VDB=0.29154;SGB=-0.651104;RPB=0.173412;MQB=1;MQSB=1;BQB=0.703221;MQ0F=0;ICB=1;HOB=0.5;AC=1;AN=2;DP4=2,4,2,6;MQ=20	GT:PL	0/1:74,0,63
Ref_Crab_Transcript_1318_519	71	T	C	60	DP=18;VDB=0.244344;SGB=-0.670168;RPB=0.33204;MQB=1;MQSB=1;BQB=0.527292;MQ0F=0;ICB=1;HOB=0.5;AC=1;AN=2;DP4=2,2,2,8;MQ=20	GT:PL	0/1:93,0,34
Ref_Crab_Transcript_1318_519	93	T	C	126	DP=21;VDB=0.46435;SGB=-0.691153;RPB=0.555556;MQB=1;MQSB=1;BQB=0.944444;MQ0F=0;ICB=-;HOB=-;AC=2;AN=2;DP4=1,1,6,12;MQ=20	GT:PL	1/1:153,20,0
Ref_Crab_Transcript_1318_519	95	A	T	60	DP=21;VDB=0.181735;SGB=-0.670168;RPB=0.984624;MQB=1;MQSB=1;BQB=0.900548;MQ0F=0;ICB=1;HOB=0.5;AC=1;AN=2;DP4=3,8,4,6;MQ=20	GT:PL	0/1:93,0,95
Ref_Crab_Transcript_1318_519	223	G	A	98	DP=27;VDB=0.965677;SGB=-0.690438;RPB=0.979428;MQB=1;MQSB=1;BQB=0.989451;MQ0F=0;ICB=1;HOB=0.5;AC=1;AN=2;DP4=5,3,9,8;MQ=20	GT:PL	0/1:131,0,56
Ref_Crab_Transcript_1318_519	251	A	G	53	DP=25;VDB=0.463795;SGB=-0.670168;RPB=0.699755;MQB=1;MQSB=1;BQB=0.269397;MQ0F=0;ICB=1;HOB=0.5;AC=1;AN=2;DP4=7,4,7,3;MQ=20	GT:PL	0/1:86,0,98
Ref_Crab_Transcript_1318_519	270	C	T	47.1021	DP=27;VDB=0.748814;SGB=-0.670168;RPB=0.992153;MQB=1;MQSB=1;BQB=0.426518;MQ0F=0;ICB=1;HOB=0.5;AC=1;AN=2;DP4=12,5,5,5;MQ=20	GT:PL	0/1:80,0,116
Ref_Crab_Transcript_1318_519	298	G	A	34.3353	DP=20;VDB=0.0266148;SGB=-0.651104;RPB=0.887446;MQB=1;MQSB=1;BQB=0.513192;MQ0F=0;ICB=1;HOB=0.5;AC=1;AN=2;DP4=8,2,6,2;MQ=20	GT:PL	0/1:67,0,83
Ref_Crab_Transcript_1318_519	317	C	T	58	DP=16;VDB=0.0257451;SGB=-0.670168;RPB=0.76338;MQB=1;MQSB=1;BQB=0.954207;MQ0F=0;ICB=1;HOB=0.5;AC=1;AN=2;DP4=4,1,6,4;MQ=20	GT:PL	0/1:91,0,43
Ref_Crab_Transcript_1318_519	320	A	C	54	DP=15;VDB=0.0177872;SGB=-0.676189;RPB=0.201286;MQB=1;MQSB=1;BQB=0.297565;MQ0F=0;ICB=1;HOB=0.5;AC=1;AN=2;DP4=2,1,8,3;MQ=20	GT:PL	0/1:87,0,15
Ref_Crab_Transcript_1456_398	207	T	C	119	DP=11;VDB=0.332122;SGB=-0.676189;RPB=-;MQB=-;MQSB=0.964642;BQB=-;MQ0F=0;ICB=-;HOB=-;AC=2;AN=2;DP4=0,0,4,7;MQ=20	GT:PL	1/1:146,33,0
Ref_Crab_Transcript_1558_397	188	A	T	86	DP=39;VDB=0.0480242;SGB=-0.691153;RPB=0.983659;MQB=1;MQSB=1;BQB=0.0178042;MQ0F=0;ICB=1;HOB=0.5;AC=1;AN=2;DP4=11,6,11,7;MQ=20	GT:PL	0/1:119,0,112
Ref_Crab_Transcript_1558_397	192	C	T	88	DP=38;VDB=0.0147072;SGB=-0.692067;RPB=0.828232;MQB=1;MQSB=1;BQB=0.997333;MQ0F=0;ICB=1;HOB=0.5;AC=1;AN=2;DP4=11,7,13,7;MQ=20	GT:PL	0/1:121,0,115
Ref_Crab_Transcript_1558_397	194	C	T	84	DP=41;VDB=0.0190225;SGB=-0.69168;RPB=0.684311;MQB=1;MQSB=1;BQB=0.999605;MQ0F=0;ICB=1;HOB=0.5;AC=1;AN=2;DP4=12,8,12,7;MQ=20	GT:PL	0/1:117,0,120
Ref_Crab_Transcript_1558_397	196	T	C	92	DP=40;VDB=0.109545;SGB=-0.692067;RPB=0.350711;MQB=1;MQSB=1;BQB=0.66755;MQ0F=0;ICB=1;HOB=0.5;AC=1;AN=2;DP4=9,8,12,8;MQ=20	GT:PL	0/1:125,0,111
Ref_Crab_Transcript_1697_1048	866	C	T	62	DP=264;VDB=0.0232261;SGB=-0.693147;RPB=0.923375;MQB=1;MQSB=1;BQB=0.0599271;MQ0F=0;ICB=1;HOB=0.5;AC=1;AN=2;DP4=49,114,27,69;MQ=20	GT:PL	0/1:95,0,154
Ref_Crab_Transcript_2090_606	247	A	G	105	DP=33;VDB=0.431814;SGB=-0.692717;RPB=0.488895;MQB=1;MQSB=1;BQB=0.818953;MQ0F=0;ICB=1;HOB=0.5;AC=1;AN=2;DP4=3,5,12,11;MQ=20	GT:PL	0/1:139,0,45
Ref_Crab_Transcript_2161_594	327	G	A	53	DP=10;VDB=0.0189358;SGB=-0.651104;RPB=0.75;MQB=1;MQSB=0.916482;BQB=0.625;MQ0F=0;ICB=1;HOB=0.5;AC=1;AN=2;DP4=1,1,2,6;MQ=20	GT:PL	0/1:86,0,10
Ref_Crab_Transcript_2352_306	89	A	G	92	DP=36;VDB=0.555672;SGB=-0.692067;RPB=0.00473678;MQB=1;MQSB=1;BQB=0.503037;MQ0F=0;ICB=1;HOB=0.5;AC=1;AN=2;DP4=9,5,13,7;MQ=20	GT:PL	0/1:125,0,94
Ref_Crab_Transcript_2352_306	190	A	T	32.9841	DP=24;VDB=0.639818;SGB=-0.651104;RPB=0.95869;MQB=1;MQSB=1;BQB=0.722151;MQ0F=0;ICB=1;HOB=0.5;AC=1;AN=2;DP4=3,12,3,5;MQ=20	GT:PL	0/1:66,0,111
Ref_Crab_Transcript_2477_943	450	A	G	127	DP=44;VDB=0.166476;SGB=-0.693127;RPB=0.985192;MQB=1;MQSB=1;BQB=0.961372;MQ0F=0;ICB=-;HOB=-;AC=2;AN=2;DP4=4,1,17,16;MQ=20	GT:PL	1/1:154,23,0
Ref_Crab_Transcript_2481_552	129	C	T	48.696	DP=10;VDB=0.790074;SGB=-0.636426;RPB=0.641538;MQB=0.916482;MQSB=1.00775;BQB=0.366593;MQ0F=0;ICB=1;HOB=0.5;AC=1;AN=2;DP4=2,1,4,3;MQ=20	GT:PL	0/1:82,0,28
Ref_Crab_Transcript_2633_761	262	T	C	89	DP=52;VDB=0.685533;SGB=-0.693143;RPB=0.999635;MQB=1;MQSB=1;BQB=0.995533;MQ0F=0;ICB=1;HOB=0.5;AC=1;AN=2;DP4=2,7,24,14;MQ=20	GT:PL	0/1:121,0,9
Ref_Crab_Transcript_3009_1032	333	C	T	43.2288	DP=23;VDB=0.5193;SGB=-0.662043;RPB=0.705828;MQB=1;MQSB=1;BQB=0.544971;MQ0F=0;ICB=1;HOB=0.5;AC=1;AN=2;DP4=5,8,5,4;MQ=20	GT:PL	0/1:76,0,115
Ref_Crab_Transcript_3093_584	267	C	G	52	DP=29;VDB=0.914019;SGB=-0.676189;RPB=0.703374;MQB=1;MQSB=1;BQB=0.717865;MQ0F=0;ICB=1;HOB=0.5;AC=1;AN=2;DP4=8,8,3,8;MQ=20	GT:PL	0/1:85,0,127
Ref_Crab_Transcript_3150_302	135	C	T	93	DP=32;VDB=0.155419;SGB=-0.692562;RPB=0.645849;MQB=1;MQSB=1;BQB=0.69457;MQ0F=0;ICB=1;HOB=0.5;AC=1;AN=2;DP4=7,3,15,7;MQ=20	GT:PL	0/1:126,0,59
Ref_Crab_Transcript_3485_487	86	C	T	115	DP=13;VDB=0.757612;SGB=-0.680642;RPB=-;MQB=-;MQSB=1;BQB=-;MQ0F=0;ICB=-;HOB=-;AC=2;AN=2;DP4=0,0,8,4;MQ=20	GT:PL	1/1:142,36,0
Ref_Crab_Transcript_3485_487	96	G	A	127	DP=14;VDB=0.795841;SGB=-0.686358;RPB=-;MQB=-;MQSB=1;BQB=-;MQ0F=0;ICB=-;HOB=-;AC=2;AN=2;DP4=0,0,9,5;MQ=20	GT:PL	1/1:154,42,0
Ref_Crab_Transcript_3485_487	107	A	G	47.3931	DP=16;VDB=0.718612;SGB=-0.651104;RPB=0.816632;MQB=1;MQSB=1;BQB=0.546428;MQ0F=0;ICB=1;HOB=0.5;AC=1;AN=2;DP4=3,4,5,3;MQ=20	GT:PL	0/1:80,0,74
Ref_Crab_Transcript_3485_487	214	G	A	58	DP=44;VDB=0.265944;SGB=-0.689466;RPB=0.738344;MQB=1;MQSB=1;BQB=0.573029;MQ0F=0;ICB=1;HOB=0.5;AC=1;AN=2;DP4=16,11,10,6;MQ=20	GT:PL	0/1:91,0,139
Ref_Crab_Transcript_3485_487	275	T	G	73	DP=30;VDB=0.920425;SGB=-0.683931;RPB=0.93435;MQB=1;MQSB=1;BQB=0.908686;MQ0F=0;ICB=1;HOB=0.5;AC=1;AN=2;DP4=7,8,6,7;MQ=20	GT:PL	0/1:106,0,120
Ref_Crab_Transcript_3485_487	336	C	T	68	DP=45;VDB=0.405132;SGB=-0.689466;RPB=0.237156;MQB=1;MQSB=1;BQB=0.62395;MQ0F=0;ICB=1;HOB=0.5;AC=1;AN=2;DP4=10,16,7,9;MQ=20	GT:PL	0/1:101,0,146
Ref_Crab_Transcript_3485_487	383	A	G	55	DP=29;VDB=0.00129114;SGB=-0.680642;RPB=0.21661;MQB=1;MQSB=1;BQB=0.996086;MQ0F=0;ICB=1;HOB=0.5;AC=1;AN=2;DP4=4,13,3,9;MQ=20	GT:PL	0/1:88,0,116
Ref_Crab_Transcript_3672_886	528	C	A	75	DP=56;VDB=0.425957;SGB=-0.692067;RPB=0.332191;MQB=1;MQSB=1;BQB=0.413211;MQ0F=0;ICB=1;HOB=0.5;AC=1;AN=2;DP4=15,11,12,8;MQ=20	GT:PL	0/1:108,0,137
Ref_Crab_Transcript_3945_789	421	A	G	41.2974	DP=17;VDB=0.456334;SGB=-0.636426;RPB=0.79189;MQB=0.887766;MQSB=0.818731;BQB=0.970677;MQ0F=0;ICB=1;HOB=0.5;AC=1;AN=2;DP4=8,2,4,3;MQ=20	GT:PL	0/1:74,0,85
Ref_Crab_Transcript_3973_1762	372	T	G	106	DP=32;VDB=0.818655;SGB=-0.692352;RPB=0.875449;MQB=1;MQSB=1;BQB=0.157011;MQ0F=0;ICB=1;HOB=0.5;AC=1;AN=2;DP4=7,4,11,10;MQ=20	GT:PL	0/1:139,0,74
Ref_Crab_Transcript_3975_3769	349	A	T	107	DP=103;VDB=0.0637077;SGB=-0.693147;RPB=0.429053;MQB=1;MQSB=1;BQB=0.831482;MQ0F=0;ICB=1;HOB=0.5;AC=1;AN=2;DP4=26,28,21,28;MQ=20	GT:PL	0/1:140,0,142
Ref_Crab_Transcript_3975_3769	1211	C	G	31.2304	DP=10;VDB=0.114818;SGB=-0.616816;RPB=0.503877;MQB=1.00775;MQSB=0.916482;BQB=0.0559863;MQ0F=0;ICB=1;HOB=0.5;AC=1;AN=2;DP4=2,2,5,1;MQ=20	GT:PL	0/1:64,0,45
Ref_Crab_Transcript_3990_1233	515	A	G	43.7075	DP=77;VDB=0.161919;SGB=-0.692717;RPB=0.585859;MQB=1;MQSB=1;BQB=0.988906;MQ0F=0;ICB=1;HOB=0.5;AC=1;AN=2;DP4=25,27,13,10;MQ=20	GT:PL	0/1:77,0,141
Ref_Crab_Transcript_3997_1995	458	G	A	59	DP=21;VDB=0.309361;SGB=-0.670168;RPB=1;MQB=1;MQSB=1;BQB=0.615112;MQ0F=0;ICB=1;HOB=0.5;AC=1;AN=2;DP4=4,7,4,6;MQ=20	GT:PL	0/1:92,0,102
Ref_Crab_Transcript_3997_1995	469	A	G	50	DP=21;VDB=0.2421;SGB=-0.662043;RPB=0.997478;MQB=1;MQSB=1;BQB=0.695144;MQ0F=0;ICB=1;HOB=0.5;AC=1;AN=2;DP4=5,7,4,5;MQ=20	GT:PL	0/1:83,0,111
Ref_Crab_Transcript_3997_1995	1266	G	A	123	DP=881;VDB=0.000132652;SGB=-0.693147;RPB=0.817441;MQB=1;MQSB=1;BQB=0.910255;MQ0F=0;ICB=1;HOB=0.5;AC=1;AN=2;DP4=218,198,216,227;MQ=20	GT:PL	0/1:156,0,137
Ref_Crab_Transcript_4000_1735	176	C	A	70	DP=27;VDB=0.15051;SGB=-0.686358;RPB=0.527181;MQB=1;MQSB=1;BQB=0.994723;MQ0F=0;ICB=1;HOB=0.5;AC=1;AN=2;DP4=9,3,10,4;MQ=20	GT:PL	0/1:103,0,87
Ref_Crab_Transcript_4064_2087	1385	C	A	40.8922	DP=148;VDB=0.0280173;SGB=-0.693147;RPB=0.462567;MQB=1;MQSB=1;BQB=0.929032;MQ0F=0;ICB=1;HOB=0.5;AC=1;AN=2;DP4=52,43,27,22;MQ=20	GT:PL	0/1:74,0,124
Ref_Crab_Transcript_4069_889	237	G	A	77	DP=12;VDB=0.746049;SGB=-0.670168;RPB=0.7;MQB=1;MQSB=1;BQB=0.5;MQ0F=0;ICB=-;HOB=-;AC=2;AN=2;DP4=0,2,3,7;MQ=20	GT:PL	1/1:105,0,2
Ref_Crab_Transcript_4069_889	238	A	G	77	DP=12;VDB=0.746049;SGB=-0.670168;RPB=0.7;MQB=1;MQSB=1;BQB=0.7;MQ0F=0;ICB=-;HOB=-;AC=2;AN=2;DP4=0,2,3,7;MQ=20	GT:PL	1/1:105,0,2
Ref_Crab_Transcript_4085_445	190	G	T	35.4053	DP=12;VDB=0.100435;SGB=-0.616816;RPB=0.542126;MQB=0.982603;MQSB=0.95494;BQB=0.864013;MQ0F=0;ICB=1;HOB=0.5;AC=1;AN=2;DP4=3,3,2,4;MQ=20	GT:PL	0/1:68,0,69
Ref_Crab_Transcript_4087_886	169	G	A	44.3914	DP=35;VDB=0.000293046;SGB=-0.680642;RPB=0.0265968;MQB=0.00751162;MQSB=0.734713;BQB=0.601788;MQ0F=0;ICB=1;HOB=0.5;AC=1;AN=2;DP4=11,12,2,10;MQ=27	GT:PL	0/1:78,0,255
Ref_Crab_Transcript_4094_509	65	C	T	70	DP=14;VDB=0.000430858;SGB=-0.670168;RPB=0.0773047;MQB=1;MQSB=1;BQB=0.997503;MQ0F=0;ICB=1;HOB=0.5;AC=1;AN=2;DP4=2,2,6,4;MQ=20	GT:PL	0/1:103,0,34
Ref_Crab_Transcript_4141_959	493	G	A	55	DP=328;VDB=0.976914;SGB=-0.693147;RPB=0.96393;MQB=1;MQSB=1;BQB=0.327275;MQ0F=0;ICB=1;HOB=0.5;AC=1;AN=2;DP4=81,114,53,68;MQ=20	GT:PL	0/1:88,0,144
Ref_Crab_Transcript_4159_809	602	C	T	119	DP=3272;VDB=0.00687224;SGB=-0.693147;RPB=0.976079;MQB=1;MQSB=1;BQB=7.13231e-32;MQ0F=0;ICB=1;HOB=0.5;AC=1;AN=2;DP4=674,620,840,898;MQ=20	GT:PL	0/1:152,0,126
Ref_Crab_Transcript_4178_413	130	T	A	38.3783	DP=16;VDB=0.753018;SGB=-0.636426;RPB=1;MQB=1;MQSB=1;BQB=0.97357;MQ0F=0;ICB=1;HOB=0.5;AC=1;AN=2;DP4=3,5,3,4;MQ=20	GT:PL	0/1:71,0,83
Ref_Crab_Transcript_4200_686	124	T	C	43.4044	DP=15;VDB=0.770878;SGB=-0.636426;RPB=0.966012;MQB=0.966012;MQSB=0.966012;BQB=0.834543;MQ0F=0;ICB=1;HOB=0.5;AC=1;AN=2;DP4=3,4,4,3;MQ=20	GT:PL	0/1:76,0,77
Ref_Crab_Transcript_4200_686	154	T	C	46.3893	DP=17;VDB=0.285428;SGB=-0.651104;RPB=0.989637;MQB=1;MQSB=1;BQB=0.629416;MQ0F=0;ICB=1;HOB=0.5;AC=1;AN=2;DP4=5,4,5,3;MQ=20	GT:PL	0/1:79,0,91
Ref_Crab_Transcript_4200_686	180	C	T	42.2821	DP=15;VDB=0.194874;SGB=-0.636426;RPB=0.95494;MQB=0.95494;MQSB=0.95494;BQB=0.838008;MQ0F=0;ICB=1;HOB=0.5;AC=1;AN=2;DP4=2,3,5,2;MQ=20	GT:PL	0/1:75,0,55
Ref_Crab_Transcript_4200_686	581	A	C	85	DP=11;VDB=0.0145983;SGB=-0.662043;RPB=1;MQB=1;MQSB=0.916482;BQB=1;MQ0F=0;ICB=-;HOB=-;AC=2;AN=2;DP4=0,1,3,6;MQ=20	GT:PL	1/1:112,10,0
Ref_Crab_Transcript_4200_686	584	C	T	85	DP=11;VDB=0.015527;SGB=-0.662043;RPB=1;MQB=1;MQSB=0.916482;BQB=1;MQ0F=0;ICB=-;HOB=-;AC=2;AN=2;DP4=0,1,3,6;MQ=20	GT:PL	1/1:112,10,0
Ref_Crab_Transcript_4200_686	596	T	C	85	DP=11;VDB=0.0175375;SGB=-0.662043;RPB=1;MQB=1;MQSB=0.916482;BQB=1;MQ0F=0;ICB=-;HOB=-;AC=2;AN=2;DP4=0,1,3,6;MQ=20	GT:PL	1/1:112,10,0
Ref_Crab_Transcript_4278_444	337	G	A	85	DP=11;VDB=0.21405;SGB=-0.662043;RPB=1;MQB=1;MQSB=1.00775;BQB=1;MQ0F=0;ICB=-;HOB=-;AC=2;AN=2;DP4=0,1,4,5;MQ=20	GT:PL	1/1:112,10,0
Ref_Crab_Transcript_4278_444	347	T	C	87	DP=10;VDB=0.397592;SGB=-0.662043;RPB=1;MQB=1;MQSB=1.00775;BQB=1;MQ0F=0;ICB=-;HOB=-;AC=2;AN=2;DP4=0,1,4,5;MQ=20	GT:PL	1/1:114,10,0
Ref_Crab_Transcript_4280_437	136	C	A	72	DP=23;VDB=0.819703;SGB=-0.680642;RPB=0.872112;MQB=1;MQSB=1;BQB=0.953755;MQ0F=0;ICB=1;HOB=0.5;AC=1;AN=2;DP4=7,4,7,5;MQ=20	GT:PL	0/1:105,0,92
Ref_Crab_Transcript_4337_1364	809	C	A	67	DP=71;VDB=0.386705;SGB=-0.69311;RPB=0.897696;MQB=1;MQSB=1;BQB=4.8573e-09;MQ0F=0;ICB=1;HOB=0.5;AC=1;AN=2;DP4=18,13,12,19;MQ=20	GT:PL	0/1:100,0,132
Ref_Crab_Transcript_4338_484	189	G	A	84	DP=64;VDB=0.155314;SGB=-0.693021;RPB=0.846286;MQB=1;MQSB=1;BQB=0.619401;MQ0F=0;ICB=1;HOB=0.5;AC=1;AN=2;DP4=23,14,16,11;MQ=20	GT:PL	0/1:117,0,137
Ref_Crab_Transcript_4387_1278	722	T	C	60	DP=18;VDB=0.32322;SGB=-0.670168;RPB=0.910176;MQB=1;MQSB=1;BQB=0.0950891;MQ0F=0;ICB=1;HOB=0.5;AC=1;AN=2;DP4=3,3,7,3;MQ=20	GT:PL	0/1:93,0,55
Ref_Crab_Transcript_4398_1172	345	T	C	67	DP=123;VDB=0.997849;SGB=-0.693147;RPB=0.973984;MQB=1;MQSB=1;BQB=0.0387893;MQ0F=0;ICB=1;HOB=0.5;AC=1;AN=2;DP4=16,10,44,44;MQ=20	GT:PL	0/1:97,0,5
Ref_Crab_Transcript_4398_1172	953	C	T	94	DP=88;VDB=0.0922604;SGB=-0.693141;RPB=0.990607;MQB=1;MQSB=1;BQB=0.0558538;MQ0F=0;ICB=1;HOB=0.5;AC=1;AN=2;DP4=24,24,16,21;MQ=20	GT:PL	0/1:127,0,146
Ref_Crab_Transcript_4399_714	183	A	G	90	DP=10;VDB=0.215483;SGB=-0.651104;RPB=-;MQB=-;MQSB=0.900802;BQB=-;MQ0F=0;ICB=-;HOB=-;AC=2;AN=2;DP4=0,0,5,3;MQ=20	GT:PL	1/1:117,24,0
Ref_Crab_Transcript_4404_702	322	C	T	31.9009	DP=42;VDB=0.777008;SGB=-0.683931;RPB=0.956592;MQB=1;MQSB=1;BQB=0.95225;MQ0F=0;ICB=1;HOB=0.5;AC=1;AN=2;DP4=13,13,2,11;MQ=20	GT:PL	0/1:65,0,143
Ref_Crab_Transcript_4404_702	558	T	C	72	DP=39;VDB=0.354724;SGB=-0.688148;RPB=0.328841;MQB=1;MQSB=1;BQB=0.550547;MQ0F=0;ICB=1;HOB=0.5;AC=1;AN=2;DP4=12,7,5,10;MQ=20	GT:PL	0/1:105,0,124
Ref_Crab_Transcript_4440_488	433	A	T	42.4044	DP=18;VDB=0.0132287;SGB=-0.651104;RPB=0.013253;MQB=1;MQSB=1;BQB=0.846352;MQ0F=0;ICB=1;HOB=0.5;AC=1;AN=2;DP4=4,4,6,2;MQ=20	GT:PL	0/1:75,0,84
Ref_Crab_Transcript_4487_545	235	T	A	34.7341	DP=10;VDB=0.181258;SGB=-0.636426;RPB=0.824834;MQB=0.916482;MQSB=1;BQB=0.733186;MQ0F=0;ICB=1;HOB=0.5;AC=1;AN=2;DP4=2,1,6,1;MQ=20	GT:PL	0/1:68,0,28
Ref_Crab_Transcript_4589_1545	1069	G	A	32.4065	DP=12;VDB=0.0769344;SGB=-0.616816;RPB=0.931779;MQB=0.982603;MQSB=0.95494;BQB=0.931779;MQ0F=0;ICB=1;HOB=0.5;AC=1;AN=2;DP4=3,3,4,2;MQ=20	GT:PL	0/1:65,0,69
Ref_Crab_Transcript_4713_4746	2593	C	T	56	DP=46;VDB=0.200442;SGB=-0.692067;RPB=0.469447;MQB=1;MQSB=1;BQB=0.534681;MQ0F=0;ICB=1;HOB=0.5;AC=1;AN=2;DP4=20,6,16,4;MQ=20	GT:PL	0/1:89,0,113
Ref_Crab_Transcript_4768_892	643	C	T	38.8932	DP=30;VDB=0.754296;SGB=-0.670168;RPB=0.869919;MQB=1;MQSB=1;BQB=1;MQ0F=0;ICB=1;HOB=0.5;AC=1;AN=2;DP4=6,14,4,6;MQ=20	GT:PL	0/1:72,0,135
Ref_Crab_Transcript_4790_408	275	T	C	60	DP=10;VDB=2.65123e-05;SGB=-0.670168;RPB=-;MQB=-;MQSB=-;BQB=-;MQ0F=0;ICB=-;HOB=-;AC=2;AN=2;DP4=0,0,0,10;MQ=20	GT:PL	1/1:87,30,0
Ref_Crab_Transcript_4790_408	280	G	A	56	DP=10;VDB=2.42239e-05;SGB=-0.651104;RPB=-;MQB=-;MQSB=-;BQB=-;MQ0F=0;ICB=-;HOB=-;AC=2;AN=2;DP4=0,0,0,8;MQ=20	GT:PL	1/1:83,24,0
Ref_Crab_Transcript_4790_408	284	C	T	61	DP=10;VDB=2.04387e-05;SGB=-0.670168;RPB=-;MQB=-;MQSB=-;BQB=-;MQ0F=0;ICB=-;HOB=-;AC=2;AN=2;DP4=0,0,0,10;MQ=20	GT:PL	1/1:88,30,0
Ref_Crab_Transcript_4790_408	297	C	T	48.0503	DP=11;VDB=1.05027e-05;SGB=-0.670168;RPB=1;MQB=1;MQSB=1;BQB=1;MQ0F=0;ICB=-;HOB=-;AC=2;AN=2;DP4=1,0,0,10;MQ=20	GT:PL	1/1:75,13,0
Ref_Crab_Transcript_4790_408	309	G	T	87	DP=12;VDB=0.00402789;SGB=-0.680642;RPB=-;MQB=-;MQSB=1;BQB=-;MQ0F=0;ICB=-;HOB=-;AC=2;AN=2;DP4=0,0,1,11;MQ=20	GT:PL	1/1:114,36,0
Ref_Crab_Transcript_4790_408	333	A	G	30.1596	DP=13;VDB=1.5756e-06;SGB=-0.670168;RPB=0.040184;MQB=1;MQSB=1;BQB=0.400803;MQ0F=0;ICB=1;HOB=0.5;AC=1;AN=2;DP4=1,2,0,10;MQ=20	GT:PL	0/1:64,0,19
Ref_Crab_Transcript_4790_408	339	C	T	30.1596	DP=13;VDB=1.33088e-06;SGB=-0.670168;RPB=0.040184;MQB=1;MQSB=1;BQB=0.944459;MQ0F=0;ICB=1;HOB=0.5;AC=1;AN=2;DP4=1,2,0,10;MQ=20	GT:PL	0/1:64,0,19
Ref_Crab_Transcript_4790_408	348	T	A	30.1596	DP=13;VDB=1.35935e-06;SGB=-0.670168;RPB=0.040184;MQB=1;MQSB=1;BQB=0.839457;MQ0F=0;ICB=1;HOB=0.5;AC=1;AN=2;DP4=1,2,0,10;MQ=20	GT:PL	0/1:64,0,19
Ref_Crab_Transcript_4826_3313	2029	C	T	70	DP=377;VDB=0.547171;SGB=-0.693147;RPB=0.460079;MQB=1;MQSB=1;BQB=0.882381;MQ0F=0;ICB=1;HOB=0.5;AC=1;AN=2;DP4=118,115,57,78;MQ=20	GT:PL	0/1:103,0,145
Ref_Crab_Transcript_4846_1037	381	C	T	47.3893	DP=17;VDB=0.135572;SGB=-0.662043;RPB=0.129812;MQB=1;MQSB=1;BQB=0.457304;MQ0F=0;ICB=1;HOB=0.5;AC=1;AN=2;DP4=7,1,7,2;MQ=20	GT:PL	0/1:80,0,64
Ref_Crab_Transcript_4872_2245	308	C	T	69	DP=108;VDB=0.864138;SGB=-0.693141;RPB=0.843082;MQB=1;MQSB=1;BQB=0.802517;MQ0F=0;ICB=1;HOB=0.5;AC=1;AN=2;DP4=36,30,18,19;MQ=20	GT:PL	0/1:102,0,137
Ref_Crab_Transcript_5112_598	463	C	T	85	DP=19;VDB=0.0742138;SGB=-0.683931;RPB=0.284674;MQB=1;MQSB=1;BQB=0.156835;MQ0F=0;ICB=1;HOB=0.5;AC=1;AN=2;DP4=1,3,7,6;MQ=20	GT:PL	0/1:119,0,18
Ref_Crab_Transcript_5341_329	212	C	A	66	DP=17;VDB=0.316684;SGB=-0.680642;RPB=0.989637;MQB=1;MQSB=1;BQB=0.643969;MQ0F=0;ICB=1;HOB=0.5;AC=1;AN=2;DP4=1,2,2,10;MQ=20	GT:PL	0/1:100,0,13
Ref_Crab_Transcript_6129_1117	968	A	T	79	DP=41;VDB=0.00453739;SGB=-0.691153;RPB=0.748114;MQB=1;MQSB=1;BQB=0.0802575;MQ0F=0;ICB=1;HOB=0.5;AC=1;AN=2;DP4=8,15,6,12;MQ=20	GT:PL	0/1:112,0,132
Ref_Crab_Transcript_6159_971	574	A	C	38.2347	DP=20;VDB=0.0926686;SGB=-0.651104;RPB=0.193283;MQB=1;MQSB=1;BQB=0.988166;MQ0F=0;ICB=1;HOB=0.5;AC=1;AN=2;DP4=7,5,5,3;MQ=20	GT:PL	0/1:71,0,108
Ref_Crab_Transcript_6313_522	102	C	T	45.3726	DP=13;VDB=0.901494;SGB=-0.636426;RPB=0.920266;MQB=0.961166;MQSB=0.961166;BQB=0.470358;MQ0F=0;ICB=1;HOB=0.5;AC=1;AN=2;DP4=3,3,4,3;MQ=20	GT:PL	0/1:78,0,64
Ref_Crab_Transcript_6484_317	217	T	A	90	DP=22;VDB=0.219351;SGB=-0.686358;RPB=0.431349;MQB=1;MQSB=1;BQB=0.592107;MQ0F=0;ICB=1;HOB=0.5;AC=1;AN=2;DP4=3,5,6,8;MQ=20	GT:PL	0/1:123,0,68
Ref_Crab_Transcript_6599_371	288	A	C	41.9041	DP=10;VDB=0.329692;SGB=-0.616816;RPB=0.231146;MQB=0.924584;MQSB=0.924584;BQB=0.346719;MQ0F=0;ICB=1;HOB=0.5;AC=1;AN=2;DP4=1,2,2,4;MQ=20	GT:PL	0/1:75,0,31
Ref_Crab_Transcript_6940_1375	250	T	C	31.1874	DP=18;VDB=0.0184582;SGB=-0.636426;RPB=0.227519;MQB=1;MQSB=1;BQB=0.995907;MQ0F=0;ICB=1;HOB=0.5;AC=1;AN=2;DP4=5,6,2,5;MQ=20	GT:PL	0/1:64,0,109
Ref_Crab_Transcript_7050_856	690	T	C	48.6714	DP=10;VDB=0.213268;SGB=-0.636426;RPB=0.824834;MQB=0.916482;MQSB=0.916482;BQB=0.366593;MQ0F=0;ICB=1;HOB=0.5;AC=1;AN=2;DP4=1,2,2,5;MQ=20	GT:PL	0/1:82,0,28
Ref_Crab_Transcript_7061_1011	214	C	T	90	DP=42;VDB=0.0662522;SGB=-0.692067;RPB=0.981049;MQB=1;MQSB=1;BQB=0.948241;MQ0F=0;ICB=1;HOB=0.5;AC=1;AN=2;DP4=14,7,11,9;MQ=20	GT:PL	0/1:123,0,118
[truncated: 38,728 more rows]

## Sheet: UMT_R_SNP_Calling
##INFO=<ID=DP,Number=1,Type=Integer,Description="Raw read depth">
[truncated: 58,122 more rows]
